# Supplementary material for: Tumor collagens predict genetic features and patient outcomes
Source: NPJ Genom Med. 2023 Jul 6;8:15. doi: 10.1038/s41525-023-00358-9 (PMC10326062; doi:10.1038/s41525-023-00358-9)
Supplement: Supplementary file 2 — Supplementary Table 2 [file 41525_2023_358_MOESM2_ESM.xlsx]

## Sheet: Sheet1
TCGA Cancer Type	TCGA Abbreviation	RNASeq (Total)	Overall Survival	Stromal Fraction	Aneuploidy Score	Mutation Rate	Ploidy	Mutation Status	Microsatellite Status	MSI-H	MSI-L	MSS	Gene Copy Number Status	1p Status	1q Status	2p Status	2q Status	3p Status	3q Status	4p Status	4q Status	5p Status	5q Status	6p Status	6q Status	7p Status	7q Status	8p Status	8q Status	9p Status	9q Status	10p Status	10q Status	11p Status	11q Status	12p Status	12q Status	13 (13q) Status	14 (14q) Status	15 (15q) Status	16p Status	16q Status	17p Status	17q Status	18p Status	18q Status	19p Status	19q Status	20p Status
Bladder Urothelial Carcinoma	BLCA	403	403	392	393	400	392	401					399	307	312	335	266	294	329	344	307	344	336	298	330	352	333	362	336	320	353	312	314	352	288	335	322	284	328	338	306	321	347	307	356	348	332	311	357
Breast invasive carcinoma	BRCA	1080	1080	1008	1024	1050	1032	1007					1052	764	872	892	864	803	860	951	857	934	892	837	835	901	885	895	825	919	889	902	838	863	702	893	846	862	842	818	942	871	923	694	950	899	840	848	915
Cervical squamous cell carcinoma and endocervical adenocarcinoma	CESC	296	296	283	283	156	283	280					282	226	261	259	202	243	229	276	243	264	266	234	252	272	256	264	250	254	269	265	251	252	206	266	261	207	251	235	251	255	268	237	267	239	236	241	264
Colon adenocarcinoma	COAD	271	271	260	265	256	265	261	269	50	45	174	269	224	253	254	249	250	254	254	247	257	236	245	248	259	253	245	251	259	251	255	238	257	251	239	254	247	252	243	249	245	258	250	253	251	257	249	237
Esophageal carcinoma	ESCA	173	173	152	152	164	152	172					170	117	117	128	117	128	110	134	120	128	115	115	123	134	99	112	121	112	125	130	117	127	124	129	116	122	119	126	140	130	133	108	130	132	129	123	133
Glioblastoma multiforme	GBM	141	141	132	133	139	133	136					136	127	129	136	136	131	131	135	133	136	130	135	126	128	130	133	132	96	131	130	134	128	135	130	129	115	119	125	131	129	131	129	130	133	133	119	135
Head and Neck squamous cell carcinoma	HNSC	513	513	479	496	491	500	493					503	415	462	453	369	443	370	438	403	445	428	428	436	450	389	444	433	405	431	450	447	426	391	452	443	388	429	424	450	445	461	417	453	422	419	445	449
Kidney renal clear cell carcinoma	KIRC	527	527	323	476	363	492	362					502	442	452	474	433	378	398	472	458	474	319	467	447	470	461	470	454	465	474	470	462	474	469	474	470	458	457	472	471	472	472	461	471	468	469	470	473
Kidney renal papillary cell carcinoma	KIRP	289	289	269	279	281	284	279					282	264	273	277	271	274	271	277	272	278	267	274	275	273	274	279	273	275	274	278	276	277	267	279	276	275	275	275	277	274	274	262	277	277	274	277	279
Brain Lower Grade Glioma	LGG	504	504	491	497	502	498	499					499	484	483	485	479	464	474	489	464	483	466	476	476	489	440	487	439	419	486	471	453	466	468	469	472	451	445	466	487	488	489	467	487	484	480	431	485
Liver hepatocellular carcinoma	LIHC	369	369	352	354	325	357	357					359	293	306	326	312	318	318	330	324	336	305	322	301	339	309	318	316	327	333	343	312	339	321	324	321	259	296	321	338	326	309	298	345	324	308	325	336
Lung adenocarcinoma	LUAD	508	508	482	490	500	495	503					500	350	442	428	406	439	407	434	414	432	418	412	425	448	409	436	381	429	440	448	438	422	384	387	388	423	381	407	428	425	438	406	446	417	419	380	432
Lung squamous cell carcinoma	LUSC	493	493	457	471	460	485	474					476	374	389	372	309	413	342	431	355	406	423	348	377	418	355	389	331	382	403	415	364	353	395	413	379	351	373	350	391	412	429	344	426	399	362	345	418
Ovarian serous cystadenocarcinoma	OV	252	252	164	237	173	242	169					244	130	158	163	150	160	161	179	145	190	145	152	138	156	146	187	143	176	172	180	135	156	151	179	155	166	151	145	171	162	204	134	212	160	62	121	188
Pancreatic adenocarcinoma	PAAD	178	178	158	158	176	158	168					176	145	148	146	142	145	150	149	148	154	142	129	154	156	142	139	137	128	149	146	150	149	149	147	140	144	152	141	151	153	148	121	148	134	147	139	145
Pheochromocytoma and Paraganglioma	PCPG	176	175	157	157	175	158	175					158	138	153	156	157	151	148	156	152	157	145	156	152	156	154	153	153	157	155	157	154	150	145	156	151	156	151	157	156	153	153	135	157	157	156	152	156
Prostate adenocarcinoma	PRAD	483	483	456	458	481	458	479					475	422	416	434	403	439	413	433	442	447	386	447	341	439	430	326	418	439	443	428	407	439	419	406	432	333	436	430	449	357	406	434	447	407	441	445	445
Rectum adenocarcinoma	READ	87	87	82	86	80	86	84	87	3	14	70	86	66	79	81	83	79	79	81	74	83	74	75	77	84	84	86	75	82	83	85	74	79	80	78	80	79	81	76	84	78	82	71	80	84	80	73	66
Sarcoma	SARC	258	258	241	241	246	241	233					250	173	165	203	185	197	205	211	191	200	199	193	191	217	193	221	197	188	217	213	200	193	173	204	174	157	179	192	204	212	156	177	205	203	184	178	207
Skin Cutaneous Melanoma	SKCM	103	103	103	103	103	103	103					2	64	69	73	74	70	67	71	68	68	70	70	68	77	69	71	73	68	68	70	73	73	56	71	69	68	70	62	74	68	74	63	72	76	69	72	73
Stomach adenocarcinoma	STAD	412	412	397	398	407	400	408	412	80	58	274	407	338	348	353	329	331	311	359	344	352	330	324	327	361	306	330	315	321	340	357	319	341	322	341	341	318	338	324	357	359	372	317	367	324	352	323	361
Testicular Germ Cell Tumors	TGCT	149	133	148	148	148	148	127					148	105	136	127	120	128	124	136	144	138	139	133	140	140	116	141	124	137	133	143	130	138	141	148	126	143	134	133	145	122	143	125	146	143	138	131	133
Thyroid carcinoma	THCA	496	496	440	456	483	457	480					490	457	457	457	457	453	457	457	456	455	456	457	457	457	455	457	456	455	457	456	451	457	457	456	457	453	457	457	457	457	456	457	456	456	450	456	457
Thymoma	THYM	120	119	104	103	119	103	119					119	102	102	103	101	102	102	103	103	101	101	100	102	103	101	100	102	100	99	101	100	103	103	103	103	97	100	101	103	102	101	101	103	102	101	103	101
Uterine Corpus Endometrial Carcinoma	UCEC	365	365	318	340	350	351	354	362	122	30	210	345	305	313	318	319	316	305	324	329	329	318	326	322	327	320	318	317	326	320	329	303	315	309	325	324	319	323	311	323	298	320	308	334	323	283	313	331
[truncated: 3 more columns]
