# Supplementary material for: Tumor collagens predict genetic features and patient outcomes
Source: NPJ Genom Med. 2023 Jul 6;8:15. doi: 10.1038/s41525-023-00358-9 (PMC10326062; doi:10.1038/s41525-023-00358-9)
Supplement: Supplementary file 3 — Supplementary Table 3 [file 41525_2023_358_MOESM3_ESM.xlsx]

## Sheet: Export Summary
	This document was exported from Numbers. Each table was converted to an Excel worksheet. All other objects on each Numbers sheet were placed on separate worksheets. Please be aware that formula calculations may differ in Excel.
	Numbers Sheet Name	Numbers Table Name	Excel Worksheet Name
	BLCA
		Table 1	BLCA
	BRCA
		Table 1	BRCA
	CESC
		Table 1	CESC
	COAD
		Table 1	COAD
	COADREAD
		Table 1	COADREAD
	ESCA
		Table 1	ESCA
	GBM
		Table 1	GBM
	HNSC
		Table 1	HNSC
	KIRC
		Table 1	KIRC
	KIRP
		Table 1	KIRP
	LGG
		Table 1	LGG
	LIHC
		Table 1	LIHC
	LUAD
		Table 1	LUAD
	LUSC
		Table 1	LUSC
	OV
		Table 1	OV
	PAAD
		Table 1	PAAD
	PCPG
		Table 1	PCPG
	PRAD
		Table 1	PRAD
	READ
		Table 1	READ
	SARC
		Table 1	SARC
	SKCM
		Table 1	SKCM
	STAD
		Table 1	STAD
	TGCT
		Table 1	TGCT
	THCA
		Table 1	THCA
	THYM
		Table 1	THYM
	UCEC
		Table 1	UCEC

## Sheet: BLCA
	colCluster	PanCan colCluster	PanCan mCluster	Hoadley iCluster	TCGA Subtype	High Aneuploidy
TCGA-FD-A43P	BLCA-C4	C4:Pan-GynwithSARC	C10	C20: Mixed (Stromal/Immune)		1
TCGA-XF-A9SZ	BLCA-C1	C4:Pan-GynwithSARC	C5	C20: Mixed (Stromal/Immune)		0
TCGA-FD-A3B8	BLCA-C1	C1:Pan-Squamous	C5	C20: Mixed (Stromal/Immune)	BLCA.4
TCGA-BT-A3PH	BLCA-C3	C10:M	C10	C25: Pan-SCC (Chr 11 amp)	BLCA.1	1
TCGA-FD-A6TB	BLCA-C1	C2:Pan-GI	C12	C20: Mixed (Stromal/Immune)		0
TCGA-GV-A6ZA	BLCA-C3	C10:M	C10	C7: Mixed (Chr 9 del)		1
TCGA-4Z-AA7Y	BLCA-C5	C1:Pan-Squamous	C10	C7: Mixed (Chr 9 del)		0
TCGA-XF-A8HD	BLCA-C2	C1:Pan-Squamous	C10	C27: PAN-SCC (HPV)		1
TCGA-FD-A3B7	BLCA-C1	C5:BRCA	C5	C20: Mixed (Stromal/Immune)	BLCA.4	0
TCGA-DK-A3WW	BLCA-C2	C1:Pan-Squamous	C10	C27: PAN-SCC (HPV)	BLCA.3	0
TCGA-G2-AA3F	BLCA-C1	C3:LUADwithLUSC/THCA	C10	C10: Pan-SCC		1
TCGA-GD-A76B	BLCA-C3	C10:M	C10	C20: Mixed (Stromal/Immune)		0
TCGA-XF-A9T3	BLCA-C1	C1:Pan-Squamous	C12	C20: Mixed (Stromal/Immune)		1
TCGA-DK-A2I1	BLCA-C1	C5:BRCA	C5	C10: Pan-SCC	BLCA.2	1
TCGA-GV-A3JV	BLCA-C3	C10:M	C10	C20: Mixed (Stromal/Immune)	BLCA.2	1
TCGA-YC-A89H	BLCA-C2	C1:Pan-Squamous	C10	C27: PAN-SCC (HPV)		0
TCGA-XF-A9T8	BLCA-C1	C4:Pan-GynwithSARC	C5	C27: PAN-SCC (HPV)		0
TCGA-DK-A6AW	BLCA-C3	C10:M	C10	C27: PAN-SCC (HPV)		0
TCGA-DK-AA6X	BLCA-C2	C1:Pan-Squamous	C10	C10: Pan-SCC		0
TCGA-DK-A3X1	BLCA-C2	C1:Pan-Squamous	C10	C10: Pan-SCC	BLCA.2	1
TCGA-2F-A9KR	BLCA-C5	C1:Pan-Squamous	C10	C7: Mixed (Chr 9 del)		1
TCGA-E7-A8O7	BLCA-C5	C10:M	C10	C7: Mixed (Chr 9 del)		0
TCGA-ZF-A9RN	BLCA-C5	C14:KIRP	C14	C7: Mixed (Chr 9 del)		1
TCGA-DK-A6B0	BLCA-C5	C10:M	C10	C27: PAN-SCC (HPV)		0
TCGA-FD-A6TK	BLCA-C2	C1:Pan-Squamous	C5	C20: Mixed (Stromal/Immune)		1
TCGA-GC-A3WC	BLCA-C2	C1:Pan-Squamous	C5	C27: PAN-SCC (HPV)	BLCA.3	0
TCGA-C4-A0EZ	BLCA-C4	C4:Pan-GynwithSARC	C14	C13: Mixed (Chr 8 del)		1
TCGA-FJ-A3ZF	BLCA-C3	C10:M	C14	C13: Mixed (Chr 8 del)	BLCA.1	1
TCGA-G2-A3IB	BLCA-C2	C1:Pan-Squamous	C10	C25: Pan-SCC (Chr 11 amp)	BLCA.3	0
TCGA-E7-A97Q	BLCA-C1	C2:Pan-GI	C5	C17: BRCA (Chr 8q amp)		1
TCGA-E7-A7XN	BLCA-C2	C1:Pan-Squamous	C10	C27: PAN-SCC (HPV)		0
TCGA-FD-A3SJ	BLCA-C1	C10:M	C1	C13: Mixed (Chr 8 del)	BLCA.2	1
TCGA-UY-A78M	BLCA-C1	C5:BRCA	C10	C25: Pan-SCC (Chr 11 amp)		0
TCGA-DK-A3X2	BLCA-C4	C10:M	C10	C27: PAN-SCC (HPV)	BLCA.1	1
TCGA-XF-AAN4	BLCA-C3	C10:M	C7	C3: Mesenchymal (Immune)		0
TCGA-E7-A4IJ	BLCA-C3	C10:M	C10	C10: Pan-SCC		1
TCGA-CU-A3KJ	BLCA-C1	C4:Pan-GynwithSARC	C10	C7: Mixed (Chr 9 del)	BLCA.3	1
TCGA-4Z-AA80	BLCA-C3	C10:M	C10	C10: Pan-SCC		1
TCGA-ZF-AA52	BLCA-C1	C5:BRCA	C5	C20: Mixed (Stromal/Immune)		1
TCGA-FD-A43N	BLCA-C1	C5:BRCA	C10	C13: Mixed (Chr 8 del)		1
TCGA-E7-A541	BLCA-C3	C10:M	C10	C14: LUAD		1
TCGA-C4-A0F1	BLCA-C1	C1:Pan-Squamous	C10		BLCA.3
TCGA-2F-A9KO	BLCA-C1	C1:Pan-Squamous	C5	C10: Pan-SCC		1
TCGA-E5-A4U1	BLCA-C5	C9:THYM/TGCT	C10	C25: Pan-SCC (Chr 11 amp)		1
TCGA-BT-A2LA	BLCA-C4	C11:Pan-Gyn	C2	C5: CNS/Endocrine		1
TCGA-GU-A42P	BLCA-C3	C10:M	C10	C13: Mixed (Chr 8 del)		1
TCGA-ZF-A9RL	BLCA-C5	C10:M	C10	C7: Mixed (Chr 9 del)		1
TCGA-ZF-A9R0	BLCA-C1	C1:Pan-Squamous	C10	C13: Mixed (Chr 8 del)		1
TCGA-GU-AATP	BLCA-C1	C4:Pan-GynwithSARC	C5	C2: BRCA (HER2 amp)		1
TCGA-XF-A8HC	BLCA-C5	C10:M	C10	C27: PAN-SCC (HPV)		1
TCGA-XF-A8HI	BLCA-C5	C10:M	C10	C7: Mixed (Chr 9 del)		0
TCGA-YF-AA3L	BLCA-C5	C10:M	C10	C27: PAN-SCC (HPV)		1
TCGA-SY-A9G0	BLCA-C1	C3:LUADwithLUSC/THCA	C12	C20: Mixed (Stromal/Immune)		1
TCGA-GC-A6I1	BLCA-C2	C1:Pan-Squamous	C10	C25: Pan-SCC (Chr 11 amp)		1
TCGA-GD-A6C6	BLCA-C3	C1:Pan-Squamous	C10	C7: Mixed (Chr 9 del)		1
TCGA-XF-A9SL	BLCA-C1	C10:M	C12	C20: Mixed (Stromal/Immune)
TCGA-GC-A4ZW	BLCA-C4	C11:Pan-Gyn	C10	C13: Mixed (Chr 8 del)		1
TCGA-ZF-A9R3	BLCA-C5	C1:Pan-Squamous	C10	C7: Mixed (Chr 9 del)		1
TCGA-FD-A6TG	BLCA-C1	C5:BRCA	C5	C20: Mixed (Stromal/Immune)		1
TCGA-K4-A6FZ	BLCA-C2	C1:Pan-Squamous	C10	C27: PAN-SCC (HPV)		1
TCGA-E5-A2PC	BLCA-C2	C1:Pan-Squamous	C10	C7: Mixed (Chr 9 del)	BLCA.1	1
TCGA-GU-A42Q	BLCA-C2	C1:Pan-Squamous	C10	C10: Pan-SCC		0
TCGA-CF-A1HR	BLCA-C3	C10:M	C10	C10: Pan-SCC	BLCA.2	1
TCGA-4Z-AA81	BLCA-C2	C1:Pan-Squamous	C10	C27: PAN-SCC (HPV)		1
TCGA-GD-A3OP	BLCA-C3	C10:M	C12	C20: Mixed (Stromal/Immune)	BLCA.2	1
TCGA-KQ-A41Q	BLCA-C2	C1:Pan-Squamous	C10	C27: PAN-SCC (HPV)		1
TCGA-4Z-AA7W	BLCA-C1	C4:Pan-GynwithSARC	C10	C27: PAN-SCC (HPV)		1
TCGA-FJ-A871	BLCA-C4	C11:Pan-Gyn	C7	C3: Mesenchymal (Immune)		0
TCGA-DK-AA6Q	BLCA-C5	C1:Pan-Squamous	C10	C10: Pan-SCC		0
TCGA-CF-A3MI	BLCA-C3	C10:M	C10	C27: PAN-SCC (HPV)	BLCA.1	1
TCGA-K4-A54R	BLCA-C1	C5:BRCA	C5	C27: PAN-SCC (HPV)		0
TCGA-CU-A72E	BLCA-C1	C5:BRCA	C5	C10: Pan-SCC		0
TCGA-KQ-A41P	BLCA-C1	C2:Pan-GI	C5	C13: Mixed (Chr 8 del)		1
TCGA-FD-A6TF	BLCA-C1	C4:Pan-GynwithSARC	C5	C20: Mixed (Stromal/Immune)		1
TCGA-UY-A8OD	BLCA-C1	C5:BRCA	C12	C2: BRCA (HER2 amp)		1
TCGA-CF-A3MF	BLCA-C5	C10:M	C10	C27: PAN-SCC (HPV)	BLCA.1	1
TCGA-E7-A6MD	BLCA-C1	C1:Pan-Squamous	C5	C25: Pan-SCC (Chr 11 amp)		1
TCGA-DK-A1AE	BLCA-C2	C1:Pan-Squamous	C10	C7: Mixed (Chr 9 del)	BLCA.3	0
TCGA-FD-A5BX	BLCA-C1	C5:BRCA	C7	C3: Mesenchymal (Immune)		0
TCGA-CF-A47Y	BLCA-C5	C10:M	C10	C12: THCA		0
TCGA-2F-A9KT	BLCA-C2	C1:Pan-Squamous	C10	C10: Pan-SCC		1
TCGA-DK-A1A6	BLCA-C1	C4:Pan-GynwithSARC	C10	C25: Pan-SCC (Chr 11 amp)	BLCA.1	1
TCGA-K4-A83P	BLCA-C1	C3:LUADwithLUSC/THCA	C12	C20: Mixed (Stromal/Immune)		1
TCGA-E7-A3X6	BLCA-C2	C1:Pan-Squamous	C10	C10: Pan-SCC	BLCA.1	1
TCGA-KQ-A41R	BLCA-C3	C10:M	C6	C27: PAN-SCC (HPV)		1
TCGA-K4-A5RJ	BLCA-C4	C4:Pan-GynwithSARC	C14	C3: Mesenchymal (Immune)		1
TCGA-E7-A97P	BLCA-C2	C1:Pan-Squamous	C5	C27: PAN-SCC (HPV)		0
TCGA-DK-A1AD	BLCA-C1	C5:BRCA	C10	C13: Mixed (Chr 8 del)	BLCA.2	1
TCGA-E7-A519	BLCA-C5	C10:M	C10	C27: PAN-SCC (HPV)		0
TCGA-XF-A9SH	BLCA-C5	C1:Pan-Squamous	C10	C27: PAN-SCC (HPV)		0
TCGA-BT-A0S7	BLCA-C1	C4:Pan-GynwithSARC	C10	C10: Pan-SCC	BLCA.3	1
TCGA-K4-A3WV	BLCA-C2	C1:Pan-Squamous	C10	C17: BRCA (Chr 8q amp)	BLCA.3	1
TCGA-FD-A62N	BLCA-C1	C1:Pan-Squamous	C5	C3: Mesenchymal (Immune)		1
TCGA-4Z-AA83	BLCA-C5	C10:M	C10	C27: PAN-SCC (HPV)		0
TCGA-XF-AAML	BLCA-C5	C8:PRAD	C10	C13: Mixed (Chr 8 del)		1
TCGA-CF-A3MG	BLCA-C5	C10:M	C10	C7: Mixed (Chr 9 del)	BLCA.1	1
TCGA-XF-AAMZ	BLCA-C3	C10:M	C10	C25: Pan-SCC (Chr 11 amp)		1
TCGA-K4-A5RH	BLCA-C1	C4:Pan-GynwithSARC	C7	C3: Mesenchymal (Immune)		1
TCGA-LC-A66R	BLCA-C2	C1:Pan-Squamous	C10	C27: PAN-SCC (HPV)		1
TCGA-CF-A47V	BLCA-C5	C10:M	C10	C25: Pan-SCC (Chr 11 amp)		0
TCGA-FD-A6TA	BLCA-C1	C5:BRCA	C5	C10: Pan-SCC		0
TCGA-GU-AATO	BLCA-C1	C4:Pan-GynwithSARC	C10	C27: PAN-SCC (HPV)		1
TCGA-DK-AA6P	BLCA-C3	C10:M	C10	C10: Pan-SCC		1
TCGA-E7-A85H	BLCA-C1	C2:Pan-GI	C10	C17: BRCA (Chr 8q amp)		0
TCGA-BT-A20R	BLCA-C1	C5:BRCA	C1	C20: Mixed (Stromal/Immune)	BLCA.2	1
TCGA-BT-A20X	BLCA-C1	C2:Pan-GI	C10	C27: PAN-SCC (HPV)		1
TCGA-UY-A78N	BLCA-C1	C7:PCPG/GBM(IDH1wt)	C10	C10: Pan-SCC		1
TCGA-CF-A3MH	BLCA-C5	C10:M	C10	C10: Pan-SCC	BLCA.1	0
TCGA-DK-A3IT	BLCA-C1	C1:Pan-Squamous	C5	C10: Pan-SCC	BLCA.2	1
TCGA-XF-A9SI	BLCA-C1	C4:Pan-GynwithSARC	C7	C20: Mixed (Stromal/Immune)		1
TCGA-CF-A9FL	BLCA-C1	C1:Pan-Squamous	C5	C7: Mixed (Chr 9 del)		0
TCGA-DK-A6B1	BLCA-C3	C10:M	C10	C27: PAN-SCC (HPV)		1
TCGA-FD-A3SP	BLCA-C1	C5:BRCA	C5	C20: Mixed (Stromal/Immune)	BLCA.4	0
TCGA-G2-A3VY	BLCA-C5	C10:M	C10	C17: BRCA (Chr 8q amp)	BLCA.1	1
TCGA-FD-A5BZ	BLCA-C1	C5:BRCA	C5	C10: Pan-SCC		1
TCGA-XF-AAN0	BLCA-C1	C3:LUADwithLUSC/THCA	C10	C20: Mixed (Stromal/Immune)		1
TCGA-FD-A3SL	BLCA-C1	C3:LUADwithLUSC/THCA	C1	C20: Mixed (Stromal/Immune)	BLCA.2	1
TCGA-YC-A8S6	BLCA-C3	C10:M	C5	C20: Mixed (Stromal/Immune)		0
TCGA-ZF-AA4X	BLCA-C5	C8:PRAD	C10	C27: PAN-SCC (HPV)		1
TCGA-XF-A9SK	BLCA-C1	C5:BRCA	C5	C10: Pan-SCC		1
TCGA-XF-A9SX	BLCA-C1	C5:BRCA	C5	C3: Mesenchymal (Immune)		0
TCGA-FD-A5BY	BLCA-C2	C1:Pan-Squamous	C5	C27: PAN-SCC (HPV)		1
TCGA-GC-A3RC	BLCA-C2	C1:Pan-Squamous	C10	C27: PAN-SCC (HPV)	BLCA.3	1
TCGA-UY-A78K	BLCA-C1	C3:LUADwithLUSC/THCA	C10	C20: Mixed (Stromal/Immune)		1
TCGA-DK-A1AC	BLCA-C1	C4:Pan-GynwithSARC	C3	C13: Mixed (Chr 8 del)	BLCA.2	1
TCGA-FJ-A3Z7	BLCA-C4	C4:Pan-GynwithSARC	C15	C20: Mixed (Stromal/Immune)	BLCA.2	1
TCGA-BT-A2LB	BLCA-C2	C1:Pan-Squamous	C5	C10: Pan-SCC	BLCA.2	1
TCGA-DK-A3IK	BLCA-C1	C1:Pan-Squamous	C5	C10: Pan-SCC	BLCA.2	1
TCGA-UY-A9PB	BLCA-C2	C1:Pan-Squamous	C5	C27: PAN-SCC (HPV)		1
TCGA-ZF-A9RC	BLCA-C1	C1:Pan-Squamous	C5	C10: Pan-SCC		1
TCGA-CF-A47T	BLCA-C3	C10:M	C10	C7: Mixed (Chr 9 del)		0
TCGA-XF-A8HF	BLCA-C1	C5:BRCA	C10	C7: Mixed (Chr 9 del)		1
TCGA-GD-A2C5	BLCA-C1	C5:BRCA	C10	C13: Mixed (Chr 8 del)	BLCA.2	1
TCGA-ZF-A9RD	BLCA-C2	C1:Pan-Squamous	C10	C27: PAN-SCC (HPV)		1
TCGA-XF-A9SV	BLCA-C1	C5:BRCA	C1	C25: Pan-SCC (Chr 11 amp)		1
TCGA-DK-A3IQ	BLCA-C1	C5:BRCA	C7	C20: Mixed (Stromal/Immune)		0
TCGA-XF-A9T4	BLCA-C2	C1:Pan-Squamous	C10	C25: Pan-SCC (Chr 11 amp)		0
TCGA-DK-AA6M	BLCA-C2	C1:Pan-Squamous	C10	C27: PAN-SCC (HPV)		0
TCGA-G2-AA3B	BLCA-C3	C10:M	C10	C27: PAN-SCC (HPV)		0
TCGA-FD-A3N5	BLCA-C2	C1:Pan-Squamous	C10	C27: PAN-SCC (HPV)	BLCA.3	0
TCGA-DK-A1A3	BLCA-C1	C3:LUADwithLUSC/THCA	C1	C10: Pan-SCC	BLCA.2	1
TCGA-PQ-A6FN	BLCA-C2	C1:Pan-Squamous	C10	C27: PAN-SCC (HPV)		1
TCGA-XF-AAMT	BLCA-C2	C1:Pan-Squamous	C5	C10: Pan-SCC		0
TCGA-BT-A20N	BLCA-C1	C1:Pan-Squamous	C10	C10: Pan-SCC	BLCA.1	1
TCGA-XF-AAMG	BLCA-C1	C4:Pan-GynwithSARC	C7	C8: UCEC		1
TCGA-ZF-AA54	BLCA-C1	C4:Pan-GynwithSARC	C7	C3: Mesenchymal (Immune)		1
TCGA-UY-A9PD	BLCA-C1	C4:Pan-GynwithSARC	C10	C10: Pan-SCC		1
TCGA-4Z-AA7Q	BLCA-C3	C10:M	C10	C27: PAN-SCC (HPV)		1
TCGA-ZF-A9R4	BLCA-C3	C10:M	C10	C13: Mixed (Chr 8 del)		1
TCGA-GU-A767	BLCA-C3	C10:M	C8	C20: Mixed (Stromal/Immune)		1
TCGA-G2-A2EO	BLCA-C1	C5:BRCA	C5	C27: PAN-SCC (HPV)	BLCA.2	1
TCGA-FD-A3B3	BLCA-C2	C1:Pan-Squamous	C5	C20: Mixed (Stromal/Immune)	BLCA.3	1
TCGA-UY-A9PH	BLCA-C1	C4:Pan-GynwithSARC	C10	C10: Pan-SCC		1
TCGA-DK-A3IM	BLCA-C2	C1:Pan-Squamous	C10	C27: PAN-SCC (HPV)	BLCA.3	1
TCGA-UY-A9PE	BLCA-C1	C5:BRCA	C6	C10: Pan-SCC		1
TCGA-HQ-A5ND	BLCA-C5	C1:Pan-Squamous	C10	C25: Pan-SCC (Chr 11 amp)		1
TCGA-4Z-AA7N	BLCA-C3	C10:M	C12	C20: Mixed (Stromal/Immune)
TCGA-K4-A4AC	BLCA-C2	C1:Pan-Squamous	C10	C27: PAN-SCC (HPV)		1
TCGA-ZF-AA51	BLCA-C1	C2:Pan-GI	C10	C17: BRCA (Chr 8q amp)		1
TCGA-DK-AA6R	BLCA-C2	C1:Pan-Squamous	C10	C27: PAN-SCC (HPV)		1
TCGA-FD-A3B4	BLCA-C2	C1:Pan-Squamous	C5	C27: PAN-SCC (HPV)		0
TCGA-XF-A8HB	BLCA-C5	C10:M	C10	C27: PAN-SCC (HPV)		0
TCGA-BT-A42F	BLCA-C1	C4:Pan-GynwithSARC	C10	C27: PAN-SCC (HPV)		1
TCGA-GV-A40G	BLCA-C4	C7:PCPG/GBM(IDH1wt)	C10	C13: Mixed (Chr 8 del)	BLCA.1	1
TCGA-FD-A5C0	BLCA-C1	C5:BRCA	C10	C13: Mixed (Chr 8 del)		1
TCGA-FD-A6TH	BLCA-C1	C1:Pan-Squamous	C5	C13: Mixed (Chr 8 del)		1
TCGA-DK-AA6W	BLCA-C4	C11:Pan-Gyn	C14	C10: Pan-SCC		1
TCGA-LT-A8JT	BLCA-C5	C10:M	C10	C17: BRCA (Chr 8q amp)		0
TCGA-DK-A3WX	BLCA-C2	C1:Pan-Squamous	C5	C10: Pan-SCC	BLCA.3	1
TCGA-FD-A43U	BLCA-C1	C4:Pan-GynwithSARC	C5	C20: Mixed (Stromal/Immune)		1
TCGA-ZF-AA4V	BLCA-C2	C1:Pan-Squamous	C10	C27: PAN-SCC (HPV)		1
TCGA-CF-A7I0	BLCA-C3	C10:M	C10	C20: Mixed (Stromal/Immune)		0
TCGA-CU-A3YL	BLCA-C3	C10:M	C10	C10: Pan-SCC	BLCA.1	0
TCGA-4Z-AA84	BLCA-C1	C1:Pan-Squamous	C10	C27: PAN-SCC (HPV)		1
TCGA-BL-A5ZZ	BLCA-C4	C10:M	C5			0
TCGA-DK-A2I2	BLCA-C2	C1:Pan-Squamous	C5	C27: PAN-SCC (HPV)	BLCA.3	1
TCGA-CF-A5UA	BLCA-C5	C10:M	C10	C7: Mixed (Chr 9 del)		0
TCGA-YF-AA3M	BLCA-C2	C1:Pan-Squamous	C10	C27: PAN-SCC (HPV)		1
TCGA-FD-A3NA	BLCA-C2	C1:Pan-Squamous	C10	C10: Pan-SCC		1
TCGA-GC-A3BM	BLCA-C5	C10:M	C10	C10: Pan-SCC	BLCA.1	1
TCGA-BT-A20T	BLCA-C1	C2:Pan-GI	C5	C10: Pan-SCC	BLCA.2	0
TCGA-UY-A8OC	BLCA-C2	C1:Pan-Squamous	C5	C7: Mixed (Chr 9 del)		1
TCGA-CU-A5W6	BLCA-C3	C10:M	C10	C10: Pan-SCC		1
TCGA-BT-A20Q	BLCA-C1	C5:BRCA	C5	C10: Pan-SCC	BLCA.2	0
TCGA-CF-A47W	BLCA-C5	C10:M	C10	C8: UCEC		0
TCGA-DK-A6B5	BLCA-C1	C4:Pan-GynwithSARC	C10	C7: Mixed (Chr 9 del)		1
TCGA-GV-A3QF	BLCA-C4	C10:M	C10	C10: Pan-SCC	BLCA.1	1
TCGA-LT-A5Z6	BLCA-C3	C10:M	C10	C27: PAN-SCC (HPV)		0
TCGA-HQ-A5NE	BLCA-C2	C1:Pan-Squamous	C5	C27: PAN-SCC (HPV)		1
TCGA-GD-A3OQ	BLCA-C2	C1:Pan-Squamous	C10	C7: Mixed (Chr 9 del)	BLCA.1	0
TCGA-KQ-A41N	BLCA-C3	C10:M	C10	C13: Mixed (Chr 8 del)		0
TCGA-4Z-AA86	BLCA-C2	C1:Pan-Squamous	C5	C27: PAN-SCC (HPV)		1
TCGA-XF-A9T6	BLCA-C2	C1:Pan-Squamous	C10	C27: PAN-SCC (HPV)		0
TCGA-ZF-AA5P	BLCA-C3	C10:M	C7	C20: Mixed (Stromal/Immune)
TCGA-GC-A3I6	BLCA-C2	C1:Pan-Squamous	C10	C27: PAN-SCC (HPV)	BLCA.3	1
TCGA-4Z-AA7S	BLCA-C3	C10:M	C10	C25: Pan-SCC (Chr 11 amp)		1
TCGA-FD-A3SM	BLCA-C1	C5:BRCA	C5	C10: Pan-SCC	BLCA.2	0
TCGA-G2-A2ES	BLCA-C2	C1:Pan-Squamous	C10	C25: Pan-SCC (Chr 11 amp)	BLCA.3	0
TCGA-GC-A3YS	BLCA-C2	C1:Pan-Squamous	C5	C10: Pan-SCC	BLCA.3	1
TCGA-UY-A78P	BLCA-C2	C1:Pan-Squamous	C5	C20: Mixed (Stromal/Immune)		0
TCGA-XF-A9SU	BLCA-C1	C1:Pan-Squamous	C5	C10: Pan-SCC		1
TCGA-GV-A40E	BLCA-C2	C1:Pan-Squamous	C10	C10: Pan-SCC	BLCA.3	1
TCGA-FD-A5BS	BLCA-C1	C4:Pan-GynwithSARC	C12	C20: Mixed (Stromal/Immune)		0
TCGA-C4-A0F7	BLCA-C3	C10:M	C10		BLCA.3
TCGA-E7-A5KE	BLCA-C3	C10:M	C10	C10: Pan-SCC		1
TCGA-FD-A5BV	BLCA-C2	C1:Pan-Squamous	C10	C10: Pan-SCC		0
TCGA-G2-AA3C	BLCA-C4	C6:LIHC	C14			0
TCGA-ZF-A9R7	BLCA-C5	C1:Pan-Squamous	C10	C25: Pan-SCC (Chr 11 amp)		1
TCGA-XF-AAN8	BLCA-C1	C4:Pan-GynwithSARC	C7	C3: Mesenchymal (Immune)		0
TCGA-E7-A5KF	BLCA-C5	C1:Pan-Squamous	C10	C25: Pan-SCC (Chr 11 amp)		0
TCGA-4Z-AA7O	BLCA-C2	C1:Pan-Squamous	C10	C7: Mixed (Chr 9 del)		0
TCGA-ZF-AA53	BLCA-C2	C1:Pan-Squamous	C5	C25: Pan-SCC (Chr 11 amp)		1
TCGA-GC-A3OO	BLCA-C2	C1:Pan-Squamous	C5	C20: Mixed (Stromal/Immune)	BLCA.2	1
TCGA-XF-AAN7	BLCA-C3	C10:M	C7	C3: Mesenchymal (Immune)		1
TCGA-CF-A9FH	BLCA-C5	C10:M	C10	C7: Mixed (Chr 9 del)		0
TCGA-H4-A2HO	BLCA-C3	C10:M	C3	C20: Mixed (Stromal/Immune)	BLCA.1	0
TCGA-DK-A3IV	BLCA-C3	C10:M	C10	C27: PAN-SCC (HPV)	BLCA.1	0
TCGA-CF-A8HY	BLCA-C5	C10:M	C10	C7: Mixed (Chr 9 del)		1
TCGA-E7-A7DV	BLCA-C1	C4:Pan-GynwithSARC	C10	C3: Mesenchymal (Immune)		1
TCGA-G2-A2EK	BLCA-C3	C10:M	C10	C20: Mixed (Stromal/Immune)	BLCA.2	0
TCGA-XF-AAN3	BLCA-C2	C1:Pan-Squamous	C5	C27: PAN-SCC (HPV)		1
TCGA-ZF-AA4R	BLCA-C1	C5:BRCA	C5	C17: BRCA (Chr 8q amp)		0
TCGA-DK-A6B6	BLCA-C3	C10:M	C10	C25: Pan-SCC (Chr 11 amp)		1
TCGA-XF-AAMX	BLCA-C1	C2:Pan-GI	C10	C13: Mixed (Chr 8 del)		0
TCGA-E7-A8O8	BLCA-C5	C10:M	C10
TCGA-5N-A9KM	BLCA-C1	C1:Pan-Squamous	C10	C7: Mixed (Chr 9 del)		0
TCGA-G2-A2EL	BLCA-C4	C7:PCPG/GBM(IDH1wt)	C14	C8: UCEC		0
TCGA-E7-A6MF	BLCA-C5	C8:PRAD	C10	C12: THCA		0
TCGA-FD-A62P	BLCA-C1	C1:Pan-Squamous	C5	C10: Pan-SCC		1
TCGA-GU-A762	BLCA-C2	C1:Pan-Squamous	C5	C27: PAN-SCC (HPV)		1
TCGA-FD-A43S	BLCA-C3	C10:M	C12	C20: Mixed (Stromal/Immune)		0
TCGA-BL-A13J	BLCA-C1	C5:BRCA	C5		BLCA.2	1
TCGA-FD-A5BR	BLCA-C3	C10:M	C5	C10: Pan-SCC		0
TCGA-BT-A20W	BLCA-C3	C10:M	C10	C10: Pan-SCC	BLCA.2	0
TCGA-FD-A3SQ	BLCA-C1	C1:Pan-Squamous	C12	C20: Mixed (Stromal/Immune)	BLCA.2	0
TCGA-DK-A6AV	BLCA-C3	C10:M	C10	C10: Pan-SCC		1
TCGA-BL-A0C8	BLCA-C3	C10:M	C15		BLCA.1	1
TCGA-BT-A42C	BLCA-C5	C1:Pan-Squamous	C10	C10: Pan-SCC	BLCA.1	1
TCGA-E7-A4XJ	BLCA-C5	C10:M	C10	C27: PAN-SCC (HPV)		0
TCGA-HQ-A2OE	BLCA-C5	C8:PRAD	C10	C22: TGCT	BLCA.1	1
TCGA-BT-A20V	BLCA-C5	C9:THYM/TGCT	C10	C27: PAN-SCC (HPV)		1
TCGA-XF-A9SJ	BLCA-C2	C1:Pan-Squamous	C5	C27: PAN-SCC (HPV)		1
TCGA-BT-A20U	BLCA-C1	C2:Pan-GI	C5	C27: PAN-SCC (HPV)	BLCA.3	0
TCGA-ZF-A9R5	BLCA-C5	C1:Pan-Squamous	C10	C27: PAN-SCC (HPV)		0
TCGA-CU-A0YN	BLCA-C2	C1:Pan-Squamous	C10	C27: PAN-SCC (HPV)	BLCA.3	1
TCGA-XF-A9SW	BLCA-C1	C5:BRCA	C7	C20: Mixed (Stromal/Immune)		1
TCGA-C4-A0F6	BLCA-C1	C5:BRCA	C10	C7: Mixed (Chr 9 del)	BLCA.2	1
TCGA-4Z-AA82	BLCA-C2	C1:Pan-Squamous	C5	C10: Pan-SCC		1
TCGA-XF-AAMR	BLCA-C1	C10:M	C12	C20: Mixed (Stromal/Immune)		1
TCGA-FD-A3B5	BLCA-C2	C1:Pan-Squamous	C10	C7: Mixed (Chr 9 del)	BLCA.3	1
TCGA-DK-AA74	BLCA-C2	C1:Pan-Squamous	C5	C20: Mixed (Stromal/Immune)		0
TCGA-G2-A2EJ	BLCA-C2	C1:Pan-Squamous	C10	C27: PAN-SCC (HPV)	BLCA.3	0
TCGA-GV-A3JW	BLCA-C3	C10:M	C10	C10: Pan-SCC	BLCA.1	1
TCGA-DK-AA76	BLCA-C3	C10:M	C10	C7: Mixed (Chr 9 del)		0
TCGA-BT-A3PK	BLCA-C2	C1:Pan-Squamous	C5	C10: Pan-SCC	BLCA.3	0
TCGA-DK-A1A5	BLCA-C1	C5:BRCA	C5	C25: Pan-SCC (Chr 11 amp)	BLCA.2	1
TCGA-FD-A5C1	BLCA-C2	C1:Pan-Squamous	C5	C27: PAN-SCC (HPV)		1
TCGA-CU-A3QU	BLCA-C4	C7:PCPG/GBM(IDH1wt)	C10	C27: PAN-SCC (HPV)	BLCA.1	1
TCGA-DK-A2I4	BLCA-C1	C5:BRCA	C5	C20: Mixed (Stromal/Immune)	BLCA.4	1
TCGA-FD-A43X	BLCA-C5	C10:M	C10	C7: Mixed (Chr 9 del)		0
TCGA-ZF-A9R1	BLCA-C5	C1:Pan-Squamous	C10	C10: Pan-SCC		1
TCGA-G2-A2EF	BLCA-C3	C1:Pan-Squamous	C10	C27: PAN-SCC (HPV)	BLCA.4	1
TCGA-GC-A6I3	BLCA-C1	C1:Pan-Squamous	C10	C10: Pan-SCC		1
TCGA-BL-A3JM	BLCA-C1	C5:BRCA	C7	C22: TGCT	BLCA.4	1
TCGA-2F-A9KP	BLCA-C3	C10:M	C10	C10: Pan-SCC		0
TCGA-GC-A3RD	BLCA-C2	C1:Pan-Squamous	C10	C10: Pan-SCC	BLCA.1	1
TCGA-R3-A69X	BLCA-C1	C1:Pan-Squamous	C12	C20: Mixed (Stromal/Immune)		1
TCGA-FD-A3SR	BLCA-C1	C3:LUADwithLUSC/THCA	C1	C10: Pan-SCC	BLCA.2	1
TCGA-FD-A62S	BLCA-C2	C5:BRCA	C5	C10: Pan-SCC		1
TCGA-DK-A1AF	BLCA-C1	C1:Pan-Squamous	C5	C20: Mixed (Stromal/Immune)	BLCA.2	0
TCGA-FD-A5BU	BLCA-C2	C1:Pan-Squamous	C5	C27: PAN-SCC (HPV)		0
TCGA-DK-A1AA	BLCA-C5	C1:Pan-Squamous	C10	C7: Mixed (Chr 9 del)	BLCA.1	0
TCGA-XF-A9T0	BLCA-C1	C2:Pan-GI	C10	C13: Mixed (Chr 8 del)		1
TCGA-ZF-AA5H	BLCA-C2	C1:Pan-Squamous	C5	C27: PAN-SCC (HPV)		1
TCGA-FD-A3SN	BLCA-C2	C1:Pan-Squamous	C10	C27: PAN-SCC (HPV)	BLCA.2	0
TCGA-ZF-AA58	BLCA-C2	C1:Pan-Squamous	C5	C3: Mesenchymal (Immune)		0
TCGA-KQ-A41O	BLCA-C5	C1:Pan-Squamous	C10	C7: Mixed (Chr 9 del)		1
TCGA-BT-A0YX	BLCA-C1	C2:Pan-GI	C10	C10: Pan-SCC	BLCA.3	0
TCGA-DK-AA6T	BLCA-C4	C10:M	C14	C3: Mesenchymal (Immune)		0
TCGA-ZF-A9R9	BLCA-C1	C5:BRCA	C1	C18: Pan-GI (MSI)		1
TCGA-E7-A677	BLCA-C5	C1:Pan-Squamous	C10	C10: Pan-SCC		0
TCGA-DK-A2I6	BLCA-C1	C1:Pan-Squamous	C10	C2: BRCA (HER2 amp)	BLCA.3	1
TCGA-UY-A78O	BLCA-C4	C8:PRAD	C10	C25: Pan-SCC (Chr 11 amp)		1
TCGA-XF-A8HH	BLCA-C1	C5:BRCA	C1	C20: Mixed (Stromal/Immune)		1
TCGA-GV-A3QH	BLCA-C3	C10:M	C10	C2: BRCA (HER2 amp)	BLCA.1	1
TCGA-FJ-A3Z9	BLCA-C5	C1:Pan-Squamous	C10	C27: PAN-SCC (HPV)		0
TCGA-XF-A9SY	BLCA-C2	C1:Pan-Squamous	C5	C27: PAN-SCC (HPV)		1
TCGA-DK-A3IS	BLCA-C5	C10:M	C10	C7: Mixed (Chr 9 del)	BLCA.1	1
TCGA-ZF-A9RM	BLCA-C3	C10:M	C10	C8: UCEC		1
TCGA-FD-A3SO	BLCA-C1	C5:BRCA	C5	C27: PAN-SCC (HPV)	BLCA.3	1
TCGA-SY-A9G5	BLCA-C1	C5:BRCA	C5	C10: Pan-SCC		1
TCGA-BT-A42E	BLCA-C2	C1:Pan-Squamous	C10	C10: Pan-SCC		1
TCGA-S5-AA26	BLCA-C5	C1:Pan-Squamous	C10	C7: Mixed (Chr 9 del)		0
TCGA-XF-AAMY	BLCA-C1	C2:Pan-GI	C1	C10: Pan-SCC		1
TCGA-E7-A3Y1	BLCA-C3	C10:M	C10	C27: PAN-SCC (HPV)	BLCA.1	0
TCGA-DK-AA75	BLCA-C3	C10:M	C10	C13: Mixed (Chr 8 del)
TCGA-DK-A3IU	BLCA-C2	C1:Pan-Squamous	C5	C20: Mixed (Stromal/Immune)	BLCA.4	0
TCGA-FD-A5BT	BLCA-C1	C5:BRCA	C7	C3: Mesenchymal (Immune)		1
TCGA-GU-A763	BLCA-C5	C9:THYM/TGCT	C10	C7: Mixed (Chr 9 del)		0
TCGA-CF-A47X	BLCA-C3	C10:M	C10	C27: PAN-SCC (HPV)		1
TCGA-GC-A3RB	BLCA-C3	C10:M	C10	C10: Pan-SCC	BLCA.1	0
TCGA-FD-A3N6	BLCA-C2	C1:Pan-Squamous	C10	C27: PAN-SCC (HPV)		0
TCGA-DK-A1AG	BLCA-C5	C10:M	C10	C7: Mixed (Chr 9 del)	BLCA.1	0
TCGA-XF-A9T5	BLCA-C1	C1:Pan-Squamous	C11	C10: Pan-SCC		1
TCGA-ZF-AA4T	BLCA-C1	C10:M	C10	C2: BRCA (HER2 amp)		1
TCGA-BT-A3PJ	BLCA-C2	C1:Pan-Squamous	C10	C27: PAN-SCC (HPV)	BLCA.3	1
TCGA-XF-A9T2	BLCA-C2	C1:Pan-Squamous	C5	C20: Mixed (Stromal/Immune)		0
TCGA-UY-A9PA	BLCA-C5	C1:Pan-Squamous	C10	C27: PAN-SCC (HPV)		0
TCGA-XF-AAMJ	BLCA-C1	C5:BRCA	C5	C20: Mixed (Stromal/Immune)		1
TCGA-5N-A9KI	BLCA-C1	C3:LUADwithLUSC/THCA	C12	C20: Mixed (Stromal/Immune)		1
TCGA-XF-A8HE	BLCA-C1	C1:Pan-Squamous	C10	C10: Pan-SCC		0
TCGA-GV-A3JX	BLCA-C4	C10:M	C3	C13: Mixed (Chr 8 del)	BLCA.2	1
TCGA-ZF-AA4U	BLCA-C5	C10:M	C10	C7: Mixed (Chr 9 del)		1
TCGA-CF-A47S	BLCA-C5	C10:M	C10	C27: PAN-SCC (HPV)		0
TCGA-DK-AA77	BLCA-C5	C10:M	C10	C7: Mixed (Chr 9 del)		0
TCGA-MV-A51V	BLCA-C3	C10:M	C3	C2: BRCA (HER2 amp)		1
TCGA-XF-A9SM	BLCA-C2	C1:Pan-Squamous	C5	C27: PAN-SCC (HPV)		1
TCGA-GU-A766	BLCA-C3	C10:M	C10	C27: PAN-SCC (HPV)		0
TCGA-DK-AA6S	BLCA-C1	C5:BRCA	C5	C10: Pan-SCC		0
TCGA-FD-A6TI	BLCA-C2	C8:PRAD	C10	C20: Mixed (Stromal/Immune)		1
TCGA-BT-A20P	BLCA-C5	C1:Pan-Squamous	C10	C7: Mixed (Chr 9 del)	BLCA.1	0
TCGA-ZF-A9RE	BLCA-C2	C1:Pan-Squamous	C10	C10: Pan-SCC		1
TCGA-DK-A3IL	BLCA-C1	C4:Pan-GynwithSARC	C10	C13: Mixed (Chr 8 del)	BLCA.2	1
TCGA-DK-AA6U	BLCA-C3	C10:M	C10	C13: Mixed (Chr 8 del)		0
TCGA-BT-A20J	BLCA-C4	C11:Pan-Gyn	C10	C10: Pan-SCC	BLCA.4	1
TCGA-4Z-AA87	BLCA-C1	C4:Pan-GynwithSARC	C10	C13: Mixed (Chr 8 del)		1
TCGA-FT-A61P	BLCA-C2	C1:Pan-Squamous	C5	C17: BRCA (Chr 8q amp)		1
TCGA-DK-AA71	BLCA-C1	C1:Pan-Squamous	C10	C10: Pan-SCC		1
TCGA-GD-A3OS	BLCA-C4	C11:Pan-Gyn	C7	C25: Pan-SCC (Chr 11 amp)	BLCA.4	1
TCGA-CU-A0YO	BLCA-C3	C10:M	C10	C20: Mixed (Stromal/Immune)	BLCA.2	1
TCGA-GU-A764	BLCA-C2	C1:Pan-Squamous	C5	C20: Mixed (Stromal/Immune)		1
TCGA-K4-A6MB	BLCA-C3	C10:M	C5	C10: Pan-SCC		1
TCGA-2F-A9KQ	BLCA-C3	C1:Pan-Squamous	C10	C7: Mixed (Chr 9 del)		0
TCGA-H4-A2HQ	BLCA-C5	C10:M	C10	C7: Mixed (Chr 9 del)	BLCA.1	1
TCGA-KQ-A41S	BLCA-C1	C10:M	C12	C20: Mixed (Stromal/Immune)		1
TCGA-K4-AAQO	BLCA-C3	C10:M	C7	C20: Mixed (Stromal/Immune)		1
TCGA-E7-A6ME	BLCA-C5	C8:PRAD	C10	C22: TGCT		0
TCGA-CF-A27C	BLCA-C5	C10:M	C10	C7: Mixed (Chr 9 del)	BLCA.1	0
TCGA-G2-A3IE	BLCA-C3	C10:M	C10	C10: Pan-SCC	BLCA.1	0
TCGA-FD-A6TC	BLCA-C1	C5:BRCA	C5	C13: Mixed (Chr 8 del)		1
TCGA-CF-A9FF	BLCA-C3	C10:M	C10	C10: Pan-SCC		0
TCGA-GV-A3QI	BLCA-C3	C10:M	C2	C8: UCEC	BLCA.1	1
TCGA-DK-A2HX	BLCA-C1	C3:LUADwithLUSC/THCA	C12	C20: Mixed (Stromal/Immune)	BLCA.2	1
TCGA-XF-AAN1	BLCA-C5	C10:M	C10	C7: Mixed (Chr 9 del)		0
TCGA-GU-AATQ	BLCA-C2	C1:Pan-Squamous	C10	C7: Mixed (Chr 9 del)		1
TCGA-DK-A1AB	BLCA-C1	C5:BRCA	C5	C20: Mixed (Stromal/Immune)	BLCA.3	1
TCGA-E7-A678	BLCA-C5	C10:M	C10	C27: PAN-SCC (HPV)		0
TCGA-CF-A9FM	BLCA-C5	C10:M	C10	C27: PAN-SCC (HPV)		0
TCGA-XF-AAN2	BLCA-C2	C1:Pan-Squamous	C10	C27: PAN-SCC (HPV)		0
TCGA-HQ-A2OF	BLCA-C3	C10:M	C3	C2: BRCA (HER2 amp)		1
TCGA-YC-A9TC	BLCA-C4	C6:LIHC	C10	C7: Mixed (Chr 9 del)		0
TCGA-ZF-AA56	BLCA-C2	C1:Pan-Squamous	C5	C10: Pan-SCC		1
TCGA-XF-AAMH	BLCA-C4	C11:Pan-Gyn	C10	C2: BRCA (HER2 amp)		0
TCGA-BT-A20O	BLCA-C1	C4:Pan-GynwithSARC	C7	C3: Mesenchymal (Immune)	BLCA.4	0
TCGA-GV-A3JZ	BLCA-C1	C3:LUADwithLUSC/THCA	C11	C2: BRCA (HER2 amp)	BLCA.2	1
TCGA-FJ-A3ZE	BLCA-C5	C10:M	C10	C7: Mixed (Chr 9 del)	BLCA.1	1
TCGA-DK-A1A7	BLCA-C3	C10:M	C10	C13: Mixed (Chr 8 del)	BLCA.1	1
TCGA-DK-A6B2	BLCA-C1	C5:BRCA	C1	C10: Pan-SCC		1
TCGA-FD-A6TD	BLCA-C2	C1:Pan-Squamous	C5	C20: Mixed (Stromal/Immune)		0
TCGA-DK-A3WY	BLCA-C1	C3:LUADwithLUSC/THCA	C7	C3: Mesenchymal (Immune)	BLCA.4
TCGA-XF-A8HG	BLCA-C2	C1:Pan-Squamous	C10	C17: BRCA (Chr 8q amp)		1
TCGA-CF-A1HS	BLCA-C2	C1:Pan-Squamous	C10	C27: PAN-SCC (HPV)	BLCA.3	1
TCGA-4Z-AA89	BLCA-C5	C1:Pan-Squamous	C10	C7: Mixed (Chr 9 del)		0
TCGA-GU-A42R	BLCA-C3	C10:M	C10	C10: Pan-SCC	BLCA.1	0
TCGA-XF-A9SP	BLCA-C1	C5:BRCA	C12	C20: Mixed (Stromal/Immune)		1
TCGA-C4-A0F0	BLCA-C2	C1:Pan-Squamous	C10	C27: PAN-SCC (HPV)	BLCA.3	1
TCGA-FD-A62O	BLCA-C2	C1:Pan-Squamous	C10	C10: Pan-SCC		1
TCGA-G2-AA3D	BLCA-C3	C10:M	C10	C10: Pan-SCC		0
TCGA-S5-A6DX	BLCA-C1	C4:Pan-GynwithSARC	C10	C20: Mixed (Stromal/Immune)		1
TCGA-CF-A8HX	BLCA-C5	C1:Pan-Squamous	C10	C7: Mixed (Chr 9 del)		0
TCGA-G2-A2EC	BLCA-C3	C10:M	C5		BLCA.2
TCGA-CU-A0YR	BLCA-C1	C4:Pan-GynwithSARC	C10	C2: BRCA (HER2 amp)	BLCA.2	1
TCGA-UY-A9PF	BLCA-C3	C10:M	C10	C13: Mixed (Chr 8 del)		1
TCGA-ZF-A9R2	BLCA-C5	C1:Pan-Squamous	C10	C7: Mixed (Chr 9 del)		1
TCGA-CF-A5U8	BLCA-C5	C1:Pan-Squamous	C10	C10: Pan-SCC		0
TCGA-E7-A7PW	BLCA-C5	C10:M	C10	C10: Pan-SCC		1
TCGA-4Z-AA7R	BLCA-C3	C10:M	C10	C17: BRCA (Chr 8q amp)		1
TCGA-XF-AAMQ	BLCA-C3	C10:M	C10	C7: Mixed (Chr 9 del)		1
TCGA-FT-A3EE	BLCA-C2	C1:Pan-Squamous	C10	C10: Pan-SCC	BLCA.1	1
TCGA-PQ-A6FI	BLCA-C2	C1:Pan-Squamous	C10	C10: Pan-SCC		1
TCGA-ZF-AA4N	BLCA-C2	C1:Pan-Squamous	C10	C27: PAN-SCC (HPV)		0
TCGA-XF-AAME	BLCA-C1	C1:Pan-Squamous	C5	C20: Mixed (Stromal/Immune)		0
TCGA-UY-A8OB	BLCA-C2	C1:Pan-Squamous	C10	C27: PAN-SCC (HPV)		1
TCGA-DK-AA6L	BLCA-C2	C1:Pan-Squamous	C10	C13: Mixed (Chr 8 del)		1
TCGA-BL-A13I	BLCA-C4	C4:Pan-GynwithSARC	C7	C3: Mesenchymal (Immune)	BLCA.4	0
TCGA-UY-A78L	BLCA-C2	C1:Pan-Squamous	C10	C27: PAN-SCC (HPV)		0
TCGA-E5-A4TZ	BLCA-C4	C4:Pan-GynwithSARC	C10	C13: Mixed (Chr 8 del)		1
TCGA-BT-A2LD	BLCA-C2	C1:Pan-Squamous	C10	C10: Pan-SCC	BLCA.4	0
TCGA-FD-A6TE	BLCA-C5	C10:M	C10	C13: Mixed (Chr 8 del)		1
TCGA-ZF-AA5N	BLCA-C5	C1:Pan-Squamous	C10	C27: PAN-SCC (HPV)		0
TCGA-ZF-A9RF	BLCA-C3	C14:KIRP	C10	C27: PAN-SCC (HPV)		0
TCGA-2F-A9KW	BLCA-C4	C10:M	C10	C10: Pan-SCC		0
TCGA-K4-A5RI	BLCA-C2	C1:Pan-Squamous	C10	C7: Mixed (Chr 9 del)		1
TCGA-XF-AAN5	BLCA-C2	C1:Pan-Squamous	C10	C27: PAN-SCC (HPV)		0
TCGA-E7-A7DU	BLCA-C5	C10:M	C10	C7: Mixed (Chr 9 del)		1
TCGA-XF-A9ST	BLCA-C4	C11:Pan-Gyn	C14			0
TCGA-K4-A3WS	BLCA-C1	C5:BRCA	C1	C20: Mixed (Stromal/Immune)	BLCA.2	1
TCGA-FD-A43Y	BLCA-C2	C1:Pan-Squamous	C5	C10: Pan-SCC		0
TCGA-FD-A3B6	BLCA-C1	C1:Pan-Squamous	C10	C27: PAN-SCC (HPV)	BLCA.4	1
TCGA-XF-AAMW	BLCA-C2	C1:Pan-Squamous	C5	C27: PAN-SCC (HPV)		1
TCGA-FD-A3SS	BLCA-C1	C1:Pan-Squamous	C10	C27: PAN-SCC (HPV)	BLCA.2	0
TCGA-4Z-AA7M	BLCA-C1	C1:Pan-Squamous	C10	C10: Pan-SCC		1
TCGA-DK-A3IN	BLCA-C2	C1:Pan-Squamous	C5	C10: Pan-SCC	BLCA.2	1

## Sheet: BRCA
	colCluster	PanCan colCluster	PanCan mCluster	Hoadley iCluster	TCGA Subtype	High Aneuploidy
TCGA-A7-A4SA	BRCA-C1	C5:BRCA	C1	C19: BRCA (Luminal)	BRCA.LumA	0
TCGA-C8-A26X	BRCA-C3	C5:BRCA	C1	C14: LUAD	BRCA.Her2	1
TCGA-E2-A10E	BRCA-C5	C5:BRCA	C1	C19: BRCA (Luminal)	BRCA.LumA	0
TCGA-E2-A1IL	BRCA-C1	C5:BRCA	C1	C19: BRCA (Luminal)	BRCA.LumA	0
TCGA-A2-A0YF	BRCA-C3	C5:BRCA	C1	C19: BRCA (Luminal)	BRCA.LumA	0
TCGA-E2-A10C	BRCA-C4	C5:BRCA	C1	C19: BRCA (Luminal)	BRCA.LumB	1
TCGA-C8-A130	BRCA-C5	C5:BRCA	C1	C19: BRCA (Luminal)	BRCA.LumB	1
TCGA-WT-AB41	BRCA-C5	C5:BRCA	C1	C17: BRCA (Chr 8q amp)	BRCA.LumA	0
TCGA-A2-A0YH	BRCA-C5	C5:BRCA	C1	C17: BRCA (Chr 8q amp)	BRCA.LumB	1
TCGA-B6-A0I9	BRCA-C1	C5:BRCA	C1	C2: BRCA (HER2 amp)	BRCA.Her2	1
TCGA-OL-A5RY	BRCA-C1	C5:BRCA	C1	C20: Mixed (Stromal/Immune)	BRCA.Normal	0
TCGA-E9-A22B	BRCA-C3	C5:BRCA	C1	C14: LUAD	BRCA.LumA	0
TCGA-AR-A24Z	BRCA-C3	C5:BRCA	C1	C7: Mixed (Chr 9 del)	BRCA.LumB	1
TCGA-D8-A1XM	BRCA-C3	C5:BRCA	C1	C19: BRCA (Luminal)	BRCA.LumA	0
TCGA-BH-A0E6	BRCA-C4	C2:Pan-GI	C1	C17: BRCA (Chr 8q amp)	BRCA.Basal	1
TCGA-A8-A09E	BRCA-C3
TCGA-C8-A26Z	BRCA-C5	C5:BRCA	C1	C19: BRCA (Luminal)	BRCA.LumA	1
TCGA-AR-A0TU	BRCA-C2	C11:Pan-Gyn	C14		BRCA.Basal
TCGA-BH-A1FE	BRCA-C1	C5:BRCA	C1	C19: BRCA (Luminal)	BRCA.Normal	0
TCGA-AR-A1AT	BRCA-C3	C5:BRCA	C1		BRCA.Her2
TCGA-BH-A0BV	BRCA-C3	C5:BRCA	C1	C25: Pan-SCC (Chr 11 amp)	BRCA.Normal	1
TCGA-BH-A0E0	BRCA-C4	C4:Pan-GynwithSARC	C10	C8: UCEC	BRCA.Normal	1
TCGA-A7-A26G	BRCA-C3	C5:BRCA	C1	C20: Mixed (Stromal/Immune)	BRCA.Basal	0
TCGA-AO-A1KS	BRCA-C3	C5:BRCA	C1	C19: BRCA (Luminal)	BRCA.LumB	1
TCGA-UU-A93S	BRCA-C4	C4:Pan-GynwithSARC	C10	C2: BRCA (HER2 amp)	BRCA.Her2	1
TCGA-D8-A1JD	BRCA-C3	C5:BRCA	C1	C19: BRCA (Luminal)	BRCA.LumB	1
TCGA-GM-A2DB	BRCA-C3	C5:BRCA	C1	C14: LUAD	BRCA.Her2	1
TCGA-A8-A09V	BRCA-C3	C5:BRCA	C1		BRCA.LumA	0
TCGA-AC-A2BK	BRCA-C2	C11:Pan-Gyn	C14	C8: UCEC	BRCA.Basal	1
TCGA-AR-A5QN	BRCA-C1	C5:BRCA	C1	C17: BRCA (Chr 8q amp)	BRCA.LumA	0
TCGA-BH-A0BP	BRCA-C1	C5:BRCA	C1	C19: BRCA (Luminal)	BRCA.LumA	1
TCGA-BH-A1FH	BRCA-C1	C5:BRCA	C1	C19: BRCA (Luminal)	BRCA.Normal
TCGA-EW-A6SD	BRCA-C3	C5:BRCA	C1	C2: BRCA (HER2 amp)	BRCA.Her2	1
TCGA-GM-A2DO	BRCA-C1	C5:BRCA	C1	C17: BRCA (Chr 8q amp)	BRCA.LumB	0
TCGA-D8-A1Y3	BRCA-C4	C4:Pan-GynwithSARC	C1	C17: BRCA (Chr 8q amp)	BRCA.LumB	1
TCGA-BH-A18L	BRCA-C5	C11:Pan-Gyn	C1	C25: Pan-SCC (Chr 11 amp)	BRCA.Normal	1
TCGA-A2-A04Q	BRCA-C3	C5:BRCA	C1	C20: Mixed (Stromal/Immune)	BRCA.Basal	1
TCGA-D8-A1Y2	BRCA-C3	C5:BRCA	C1	C19: BRCA (Luminal)	BRCA.LumB	1
TCGA-EW-A1OZ	BRCA-C3	C5:BRCA	C1	C2: BRCA (HER2 amp)	BRCA.LumB	1
TCGA-AO-A12B	BRCA-C5	C4:Pan-GynwithSARC	C1	C19: BRCA (Luminal)	BRCA.LumA	1
TCGA-AN-A0FN	BRCA-C3	C5:BRCA	C1	C19: BRCA (Luminal)	BRCA.LumA	0
TCGA-A2-A0CQ	BRCA-C1	C5:BRCA	C1	C19: BRCA (Luminal)	BRCA.LumA	0
TCGA-D8-A3Z6	BRCA-C1	C5:BRCA	C1	C19: BRCA (Luminal)	BRCA.LumA	0
TCGA-BH-A1FN	BRCA-C3	C5:BRCA	C1	C13: Mixed (Chr 8 del)	BRCA.Normal	1
TCGA-BH-A2L8	BRCA-C1	C5:BRCA	C1	C19: BRCA (Luminal)	BRCA.LumA	0
TCGA-PL-A8LZ	BRCA-C4	C4:Pan-GynwithSARC	C1	C20: Mixed (Stromal/Immune)	BRCA.Basal	1
TCGA-EW-A6SB	BRCA-C4	C4:Pan-GynwithSARC	C10	C27: PAN-SCC (HPV)	BRCA.Basal	1
TCGA-BH-A1F6	BRCA-C4	C4:Pan-GynwithSARC	C1	C13: Mixed (Chr 8 del)	BRCA.Normal	1
TCGA-AC-A2FB	BRCA-C1	C5:BRCA	C1	C2: BRCA (HER2 amp)	BRCA.Normal	0
TCGA-EW-A3U0	BRCA-C2	C11:Pan-Gyn	C1	C20: Mixed (Stromal/Immune)	BRCA.Basal	1
TCGA-D8-A27F	BRCA-C4	C4:Pan-GynwithSARC	C1	C10: Pan-SCC	BRCA.Basal	0
TCGA-EW-A1PG	BRCA-C1	C5:BRCA	C1	C19: BRCA (Luminal)	BRCA.Normal	0
TCGA-AC-A7VB	BRCA-C5	C4:Pan-GynwithSARC	C1	C17: BRCA (Chr 8q amp)	BRCA.LumB	0
TCGA-E2-A158	BRCA-C2	C2:Pan-GI	C14	C13: Mixed (Chr 8 del)	BRCA.Normal	0
TCGA-E2-A1IH	BRCA-C3	C5:BRCA	C1	C17: BRCA (Chr 8q amp)	BRCA.LumA	1
TCGA-A8-A06Y	BRCA-C4	C5:BRCA	C1	C7: Mixed (Chr 9 del)	BRCA.LumA	1
TCGA-BH-A0B1	BRCA-C5	C5:BRCA	C1		BRCA.LumA
TCGA-B6-A1KI	BRCA-C3	C5:BRCA	C1	C19: BRCA (Luminal)	BRCA.LumA	1
TCGA-A2-A3XV	BRCA-C4	C4:Pan-GynwithSARC	C1	C2: BRCA (HER2 amp)	BRCA.Her2	0
TCGA-A2-A0YT	BRCA-C1	C5:BRCA	C1	C25: Pan-SCC (Chr 11 amp)	BRCA.LumB	1
TCGA-E9-A1NC	BRCA-C2	C2:Pan-GI	C1		BRCA.Basal	0
TCGA-AR-A24Q	BRCA-C5	C5:BRCA	C1	C13: Mixed (Chr 8 del)	BRCA.Basal	1
TCGA-AN-A03Y	BRCA-C3	C5:BRCA	C1	C25: Pan-SCC (Chr 11 amp)	BRCA.LumB	1
TCGA-E9-A248	BRCA-C3	C3:LUADwithLUSC/THCA	C1	C20: Mixed (Stromal/Immune)	BRCA.Her2	1
TCGA-A7-A13G	BRCA-C3	C5:BRCA	C1	C19: BRCA (Luminal)	BRCA.LumA	0
TCGA-EW-A1P7	BRCA-C4	C3:LUADwithLUSC/THCA	C1	C20: Mixed (Stromal/Immune)	BRCA.Normal	0
TCGA-A2-A0EX	BRCA-C3	C5:BRCA	C1	C17: BRCA (Chr 8q amp)	BRCA.LumA	0
TCGA-B6-A402	BRCA-C2	C4:Pan-GynwithSARC	C1	C13: Mixed (Chr 8 del)	BRCA.Basal	1
TCGA-A8-A094	BRCA-C3	C5:BRCA	C1	C19: BRCA (Luminal)	BRCA.Her2	1
TCGA-AO-A0J4	BRCA-C2	C11:Pan-Gyn	C1	C13: Mixed (Chr 8 del)	BRCA.Basal	1
TCGA-A1-A0SE	BRCA-C1	C5:BRCA	C1	C19: BRCA (Luminal)	BRCA.LumA	0
TCGA-GM-A3XL	BRCA-C4	C4:Pan-GynwithSARC	C10	C13: Mixed (Chr 8 del)	BRCA.Basal	0
TCGA-BH-A18R	BRCA-C1	C5:BRCA	C1	C2: BRCA (HER2 amp)	BRCA.Normal	0
TCGA-AN-A049	BRCA-C3	C5:BRCA	C1	C2: BRCA (HER2 amp)	BRCA.LumA	0
TCGA-GM-A4E0	BRCA-C1	C5:BRCA	C1	C19: BRCA (Luminal)	BRCA.LumA	0
TCGA-A8-A08S	BRCA-C3
TCGA-A2-A04X	BRCA-C3	C5:BRCA	C1	C2: BRCA (HER2 amp)	BRCA.Her2	0
TCGA-LL-A442	BRCA-C4	C11:Pan-Gyn	C14	C19: BRCA (Luminal)	BRCA.LumA	0
TCGA-BH-A0BS	BRCA-C3	C5:BRCA	C1	C19: BRCA (Luminal)	BRCA.Normal	0
TCGA-A7-A13H	BRCA-C1	C5:BRCA	C1	C19: BRCA (Luminal)	BRCA.LumA	0
TCGA-AQ-A54N	BRCA-C2	C11:Pan-Gyn	C14	C8: UCEC	BRCA.Basal	1
TCGA-AO-A0JI	BRCA-C5	C11:Pan-Gyn	C1	C17: BRCA (Chr 8q amp)	BRCA.LumA	0
TCGA-A8-A09G	BRCA-C3	C3:LUADwithLUSC/THCA	C1	C19: BRCA (Luminal)	BRCA.Her2	0
TCGA-E9-A1RC	BRCA-C5	C5:BRCA	C1	C19: BRCA (Luminal)	BRCA.LumA	1
TCGA-AR-A24T	BRCA-C3	C5:BRCA	C1	C19: BRCA (Luminal)	BRCA.LumA
TCGA-AR-A0U0	BRCA-C3	C5:BRCA	C10		BRCA.Basal	1
TCGA-E9-A1RA	BRCA-C3	C5:BRCA	C1	C19: BRCA (Luminal)	BRCA.LumA	1
TCGA-EW-A1OX	BRCA-C3	C4:Pan-GynwithSARC	C14	C19: BRCA (Luminal)	BRCA.LumB	0
TCGA-Z7-A8R5	BRCA-C1	C1:Pan-Squamous	C1	C19: BRCA (Luminal)	BRCA.LumA	1
TCGA-BH-A0GY	BRCA-C3	C5:BRCA	C1	C17: BRCA (Chr 8q amp)	BRCA.LumA	1
TCGA-A2-A0D0	BRCA-C4	C4:Pan-GynwithSARC	C10	C13: Mixed (Chr 8 del)	BRCA.Basal	1
TCGA-BH-A0HP	BRCA-C1	C5:BRCA	C1	C19: BRCA (Luminal)	BRCA.LumA	0
TCGA-AO-A0JM	BRCA-C3	C5:BRCA	C1	C2: BRCA (HER2 amp)	BRCA.LumB	1
TCGA-B6-A409	BRCA-C4	C2:Pan-GI	C1	C13: Mixed (Chr 8 del)	BRCA.Basal	1
TCGA-AO-A12G	BRCA-C5	C5:BRCA	C1	C19: BRCA (Luminal)	BRCA.LumA	0
TCGA-AO-A1KP	BRCA-C3	C5:BRCA	C1	C17: BRCA (Chr 8q amp)	BRCA.LumB	0
TCGA-BH-A6R8	BRCA-C3	C5:BRCA	C1	C19: BRCA (Luminal)	BRCA.LumA	1
TCGA-A8-A07J	BRCA-C3	C5:BRCA	C1	C19: BRCA (Luminal)	BRCA.LumA	0
TCGA-5L-AAT0	BRCA-C3	C5:BRCA	C1	C19: BRCA (Luminal)	BRCA.LumA	0
TCGA-A8-A08I	BRCA-C5	C5:BRCA	C1	C19: BRCA (Luminal)	BRCA.LumB	1
TCGA-E2-A14R	BRCA-C4	C2:Pan-GI	C14	C8: UCEC	BRCA.Basal	1
TCGA-B6-A0RU	BRCA-C2	C11:Pan-Gyn	C1	C19: BRCA (Luminal)	BRCA.Basal	1
TCGA-BH-A0HF	BRCA-C3	C5:BRCA	C1		BRCA.LumA
TCGA-A8-A07U	BRCA-C3	C5:BRCA	C1	C20: Mixed (Stromal/Immune)	BRCA.Basal	1
TCGA-BH-A0DG	BRCA-C3	C5:BRCA	C1	C19: BRCA (Luminal)	BRCA.Normal	0
TCGA-E2-A1LG	BRCA-C4	C4:Pan-GynwithSARC	C10	C17: BRCA (Chr 8q amp)	BRCA.Basal	1
TCGA-E2-A15F	BRCA-C5	C5:BRCA	C1	C17: BRCA (Chr 8q amp)	BRCA.LumA	0
TCGA-A8-A08G	BRCA-C3	C5:BRCA	C1	C17: BRCA (Chr 8q amp)	BRCA.LumB	1
TCGA-D8-A1XQ	BRCA-C2	C5:BRCA	C1	C13: Mixed (Chr 8 del)	BRCA.Basal	0
TCGA-AC-A3TN	BRCA-C3	C5:BRCA	C1	C19: BRCA (Luminal)	BRCA.LumA	0
TCGA-A2-A1FW	BRCA-C5	C5:BRCA	C1	C13: Mixed (Chr 8 del)	BRCA.LumB	1
TCGA-BH-A0E1	BRCA-C1	C5:BRCA	C1	C19: BRCA (Luminal)	BRCA.Normal	0
TCGA-E2-A1IG	BRCA-C3	C5:BRCA	C1	C25: Pan-SCC (Chr 11 amp)	BRCA.Normal	0
TCGA-E9-A1NA	BRCA-C3	C5:BRCA	C1	C19: BRCA (Luminal)		0
TCGA-D8-A1XD	BRCA-C5	C5:BRCA	C1	C7: Mixed (Chr 9 del)	BRCA.LumA	0
TCGA-E2-A14X	BRCA-C4	C4:Pan-GynwithSARC	C1	C19: BRCA (Luminal)	BRCA.Basal	1
TCGA-B6-A0RT	BRCA-C4	C3:LUADwithLUSC/THCA	C1	C20: Mixed (Stromal/Immune)	BRCA.Basal	0
TCGA-BH-A208	BRCA-C3	C5:BRCA	C1	C19: BRCA (Luminal)	BRCA.Normal	1
TCGA-BH-A18N	BRCA-C5	C5:BRCA	C1	C13: Mixed (Chr 8 del)	BRCA.Normal	1
TCGA-C8-A137	BRCA-C3	C5:BRCA	C1	C2: BRCA (HER2 amp)	BRCA.Her2	0
TCGA-A7-A5ZV	BRCA-C2	C11:Pan-Gyn	C4	C7: Mixed (Chr 9 del)	BRCA.Basal	1
TCGA-EW-A1P3	BRCA-C1	C5:BRCA	C1	C19: BRCA (Luminal)	BRCA.LumA	0
TCGA-E9-A1N4	BRCA-C3	C5:BRCA	C1	C19: BRCA (Luminal)	BRCA.Normal	0
TCGA-A8-A085	BRCA-C3	C4:Pan-GynwithSARC	C1	C19: BRCA (Luminal)	BRCA.LumB	0
TCGA-A7-A0DB	BRCA-C3	C5:BRCA	C1	C19: BRCA (Luminal)	BRCA.Normal	1
TCGA-A8-A090	BRCA-C3	C5:BRCA	C1	C19: BRCA (Luminal)	BRCA.LumA	1
TCGA-D8-A1JS	BRCA-C4	C4:Pan-GynwithSARC	C1	C19: BRCA (Luminal)	BRCA.LumA	0
TCGA-C8-A138	BRCA-C1	C5:BRCA	C1	C2: BRCA (HER2 amp)	BRCA.Her2	1
TCGA-Z7-A8R6	BRCA-C1	C5:BRCA	C1	C25: Pan-SCC (Chr 11 amp)	BRCA.LumB	1
TCGA-B6-A0RE	BRCA-C4	C2:Pan-GI	C5	C13: Mixed (Chr 8 del)	BRCA.Basal	1
TCGA-E2-A155	BRCA-C5	C5:BRCA	C1	C19: BRCA (Luminal)	BRCA.LumB	0
TCGA-A7-A6VX	BRCA-C3	C5:BRCA	C1	C19: BRCA (Luminal)	BRCA.LumB	1
TCGA-A8-A09Q	BRCA-C3	C5:BRCA	C1	C19: BRCA (Luminal)	BRCA.LumB	1
TCGA-D8-A73U	BRCA-C3	C5:BRCA	C1	C20: Mixed (Stromal/Immune)	BRCA.LumA	1
TCGA-GM-A2DD	BRCA-C1	C5:BRCA	C1	C14: LUAD	BRCA.Normal	1
TCGA-A2-A04Y	BRCA-C3	C5:BRCA	C1	C19: BRCA (Luminal)	BRCA.LumB	0
TCGA-E2-A1IK	BRCA-C1	C5:BRCA	C1	C19: BRCA (Luminal)	BRCA.LumA	0
TCGA-AO-A0JF	BRCA-C3	C5:BRCA	C1	C19: BRCA (Luminal)	BRCA.LumA	0
TCGA-E9-A243	BRCA-C3	C3:LUADwithLUSC/THCA	C1	C20: Mixed (Stromal/Immune)	BRCA.Basal	1
TCGA-A2-A3KC	BRCA-C1	C5:BRCA	C1	C19: BRCA (Luminal)	BRCA.LumA	0
TCGA-B6-A0X4	BRCA-C1	C1:Pan-Squamous	C1	C19: BRCA (Luminal)	BRCA.LumA	0
TCGA-E9-A1NG	BRCA-C3	C5:BRCA	C1	C19: BRCA (Luminal)	BRCA.Normal	0
TCGA-AN-A0XT	BRCA-C4	C5:BRCA	C1	C19: BRCA (Luminal)	BRCA.LumA	0
TCGA-AN-A0FY	BRCA-C5	C5:BRCA	C1	C13: Mixed (Chr 8 del)	BRCA.LumB	1
TCGA-E2-A109	BRCA-C5	C5:BRCA	C1	C17: BRCA (Chr 8q amp)	BRCA.LumB	1
TCGA-BH-A0DH	BRCA-C3	C5:BRCA	C1	C19: BRCA (Luminal)	BRCA.Normal	0
TCGA-A2-A04P	BRCA-C4	C4:Pan-GynwithSARC	C1	C13: Mixed (Chr 8 del)	BRCA.Basal	0
TCGA-A2-A0EV	BRCA-C3	C5:BRCA	C1	C19: BRCA (Luminal)	BRCA.LumA	1
TCGA-OL-A5RX	BRCA-C1	C1:Pan-Squamous	C1	C19: BRCA (Luminal)	BRCA.LumA	0
TCGA-AR-A24O	BRCA-C3	C5:BRCA	C1	C19: BRCA (Luminal)	BRCA.LumA	0
TCGA-AC-A8OQ	BRCA-C2	C11:Pan-Gyn	C1	C20: Mixed (Stromal/Immune)	BRCA.Basal	1
TCGA-B6-A0RN	BRCA-C3	C5:BRCA	C1	C19: BRCA (Luminal)	BRCA.LumA	0
TCGA-BH-A0H0	BRCA-C5	C5:BRCA	C1	C19: BRCA (Luminal)	BRCA.LumB	0
TCGA-OL-A5RV	BRCA-C1	C1:Pan-Squamous	C1	C19: BRCA (Luminal)	BRCA.LumA	0
TCGA-3C-AAAU	BRCA-C3	C5:BRCA	C1	C19: BRCA (Luminal)	BRCA.LumA	1
TCGA-BH-A0BL	BRCA-C3	C5:BRCA	C1	C20: Mixed (Stromal/Immune)	BRCA.Basal	1
TCGA-BH-A42U	BRCA-C1	C1:Pan-Squamous	C1	C20: Mixed (Stromal/Immune)	BRCA.Normal
TCGA-A2-A0CU	BRCA-C5	C5:BRCA	C1	C19: BRCA (Luminal)	BRCA.LumA	1
TCGA-AR-A0TV	BRCA-C5	C4:Pan-GynwithSARC	C1	C19: BRCA (Luminal)	BRCA.LumB	1
TCGA-BH-A42V	BRCA-C1	C5:BRCA	C1	C19: BRCA (Luminal)	BRCA.LumA	0
TCGA-A2-A3XY	BRCA-C2	C11:Pan-Gyn	C1	C20: Mixed (Stromal/Immune)	BRCA.Basal	0
TCGA-AR-A24L	BRCA-C5	C5:BRCA	C1	C19: BRCA (Luminal)	BRCA.LumA	0
TCGA-EW-A423	BRCA-C4	C4:Pan-GynwithSARC	C1	C25: Pan-SCC (Chr 11 amp)	BRCA.LumA	1
TCGA-A2-A25A	BRCA-C1	C5:BRCA	C1	C19: BRCA (Luminal)	BRCA.Normal	0
TCGA-A7-A5ZW	BRCA-C1	C5:BRCA	C1	C19: BRCA (Luminal)	BRCA.LumA	0
TCGA-A2-A04W	BRCA-C3	C5:BRCA	C1	C2: BRCA (HER2 amp)	BRCA.Her2	1
TCGA-B6-A0WZ	BRCA-C3	C5:BRCA	C1	C19: BRCA (Luminal)	BRCA.LumA	1
TCGA-A8-A09N	BRCA-C3	C5:BRCA	C1	C19: BRCA (Luminal)	BRCA.LumB	1
TCGA-AO-A124	BRCA-C2	C11:Pan-Gyn	C4	C13: Mixed (Chr 8 del)	BRCA.Basal	1
TCGA-AR-A2LO	BRCA-C1	C5:BRCA	C1	C19: BRCA (Luminal)	BRCA.LumA	1
TCGA-AC-A6IX	BRCA-C1	C5:BRCA	C1	C19: BRCA (Luminal)	BRCA.LumA	0
TCGA-GI-A2C9	BRCA-C2	C5:BRCA	C1	C20: Mixed (Stromal/Immune)	BRCA.Normal	0
TCGA-A2-A25C	BRCA-C3	C5:BRCA	C1	C19: BRCA (Luminal)	BRCA.LumB	0
TCGA-C8-A134	BRCA-C4	C4:Pan-GynwithSARC	C1	C14: LUAD	BRCA.Basal	0
TCGA-BH-A0E7	BRCA-C5	C5:BRCA	C1	C19: BRCA (Luminal)	BRCA.LumA	0
TCGA-BH-A1F2	BRCA-C3	C5:BRCA	C1	C2: BRCA (HER2 amp)	BRCA.Normal	1
TCGA-D8-A1J8	BRCA-C3	C5:BRCA	C1	C19: BRCA (Luminal)	BRCA.LumB	1
TCGA-AN-A0FZ	BRCA-C3	C5:BRCA	C1	C17: BRCA (Chr 8q amp)	BRCA.LumA	1
TCGA-E2-A1LK	BRCA-C2	C11:Pan-Gyn	C10	C17: BRCA (Chr 8q amp)	BRCA.Basal	1
TCGA-BH-A0BO	BRCA-C1	C5:BRCA	C1	C19: BRCA (Luminal)	BRCA.LumA	0
TCGA-OL-A66I	BRCA-C4	C4:Pan-GynwithSARC	C1	C20: Mixed (Stromal/Immune)	BRCA.Basal	1
TCGA-AR-A251	BRCA-C4	C4:Pan-GynwithSARC	C1	C10: Pan-SCC	BRCA.Basal	1
TCGA-LL-A8F5	BRCA-C4	C2:Pan-GI	C5	C13: Mixed (Chr 8 del)	BRCA.Basal	1
TCGA-3C-AALJ	BRCA-C5	C5:BRCA	C1	C17: BRCA (Chr 8q amp)	BRCA.LumB	0
TCGA-D8-A1XW	BRCA-C5	C5:BRCA	C1	C19: BRCA (Luminal)	BRCA.Normal	1
TCGA-A1-A0SQ	BRCA-C1	C5:BRCA	C1	C19: BRCA (Luminal)	BRCA.LumA	0
TCGA-AR-A2LM	BRCA-C1	C5:BRCA	C1	C19: BRCA (Luminal)	BRCA.LumA	0
TCGA-E2-A14Z	BRCA-C1	C5:BRCA	C1	C19: BRCA (Luminal)	BRCA.LumA	1
TCGA-EW-A1IW	BRCA-C1	C5:BRCA	C1	C2: BRCA (HER2 amp)	BRCA.LumA	0
TCGA-A8-A097	BRCA-C5	C5:BRCA	C1	C17: BRCA (Chr 8q amp)	BRCA.LumA	1
TCGA-AR-A1AR	BRCA-C3	C4:Pan-GynwithSARC	C1	C17: BRCA (Chr 8q amp)	BRCA.Basal	1
TCGA-BH-A1EV	BRCA-C3	C5:BRCA	C1	C2: BRCA (HER2 amp)	BRCA.Normal	1
TCGA-AN-A0XW	BRCA-C3	C5:BRCA	C1	C19: BRCA (Luminal)	BRCA.LumA	0
TCGA-A7-A4SF	BRCA-C5	C5:BRCA	C1	C2: BRCA (HER2 amp)	BRCA.Her2	1
TCGA-D8-A1XB	BRCA-C3	C5:BRCA	C1	C19: BRCA (Luminal)	BRCA.LumA	0
TCGA-B6-A400	BRCA-C2	C11:Pan-Gyn	C5	C20: Mixed (Stromal/Immune)	BRCA.Basal	0
TCGA-GM-A2DH	BRCA-C1	C5:BRCA	C1	C19: BRCA (Luminal)	BRCA.Her2	1
TCGA-AC-A3OD	BRCA-C1	C5:BRCA	C1	C19: BRCA (Luminal)	BRCA.LumA	0
TCGA-A2-A0SX	BRCA-C4	C4:Pan-GynwithSARC	C1	C20: Mixed (Stromal/Immune)	BRCA.Basal	1
TCGA-AC-A23C	BRCA-C3	C5:BRCA	C1	C19: BRCA (Luminal)	BRCA.LumA	0
TCGA-E2-A2P6	BRCA-C4	C5:BRCA	C1	C19: BRCA (Luminal)	BRCA.LumA	0
TCGA-AC-A62Y	BRCA-C3	C5:BRCA	C1	C19: BRCA (Luminal)	BRCA.LumA	1
TCGA-A2-A0EM	BRCA-C3	C5:BRCA	C1	C19: BRCA (Luminal)	BRCA.LumA	0
TCGA-A1-A0SF	BRCA-C1	C5:BRCA	C1	C19: BRCA (Luminal)	BRCA.LumA	1
TCGA-BH-A0AU	BRCA-C5	C5:BRCA	C1	C19: BRCA (Luminal)	BRCA.Normal	1
TCGA-A8-A09I	BRCA-C3	C5:BRCA	C1	C2: BRCA (HER2 amp)	BRCA.LumB	1
TCGA-A7-A13F	BRCA-C1	C5:BRCA	C1	C19: BRCA (Luminal)	BRCA.Normal	1
TCGA-D8-A27R	BRCA-C5	C5:BRCA	C1	C17: BRCA (Chr 8q amp)	BRCA.LumB	1
TCGA-OL-A5RU	BRCA-C1	C5:BRCA	C1	C19: BRCA (Luminal)	BRCA.LumA	0
TCGA-AR-A24W	BRCA-C1	C5:BRCA	C1	C19: BRCA (Luminal)	BRCA.LumA	1
TCGA-BH-A1EW	BRCA-C1	C5:BRCA	C1	C19: BRCA (Luminal)	BRCA.LumA	1
TCGA-D8-A27P	BRCA-C1	C5:BRCA	C1	C19: BRCA (Luminal)	BRCA.LumA	0
TCGA-OL-A5D8	BRCA-C4	C5:BRCA	C1		BRCA.LumA	0
TCGA-BH-A0EI	BRCA-C3	C5:BRCA	C1	C17: BRCA (Chr 8q amp)	BRCA.LumA	0
TCGA-E9-A1NI	BRCA-C5	C5:BRCA	C1	C19: BRCA (Luminal)	BRCA.LumB	1
TCGA-A2-A0D4	BRCA-C1	C5:BRCA	C1	C17: BRCA (Chr 8q amp)	BRCA.LumB	1
TCGA-BH-A0H3	BRCA-C1	C5:BRCA	C1	C19: BRCA (Luminal)	BRCA.LumA	0
TCGA-OL-A6VR	BRCA-C1	C8:PRAD	C1	C17: BRCA (Chr 8q amp)	BRCA.LumA	0
TCGA-EW-A6SC	BRCA-C5	C5:BRCA	C1	C19: BRCA (Luminal)	BRCA.LumA	0
TCGA-EW-A1J5	BRCA-C1	C5:BRCA	C1	C19: BRCA (Luminal)	BRCA.LumA	0
TCGA-AR-A5QM	BRCA-C1	C5:BRCA	C1		BRCA.LumA	1
TCGA-A7-A6VY	BRCA-C3	C5:BRCA	C5	C27: PAN-SCC (HPV)	BRCA.Basal	0
TCGA-AR-A1AS	BRCA-C3	C5:BRCA	C1	C19: BRCA (Luminal)	BRCA.LumA	0
TCGA-A2-A0CZ	BRCA-C3	C5:BRCA	C1		BRCA.Normal
TCGA-BH-A18F	BRCA-C3	C5:BRCA	C1	C19: BRCA (Luminal)	BRCA.LumA	1
TCGA-BH-A18H	BRCA-C1	C5:BRCA	C1	C19: BRCA (Luminal)	BRCA.LumA	1
TCGA-AN-A0XO	BRCA-C3	C5:BRCA	C1	C19: BRCA (Luminal)	BRCA.LumA	0
TCGA-AO-A0JE	BRCA-C3	C5:BRCA	C1	C19: BRCA (Luminal)	BRCA.Her2	1
TCGA-E2-A1L8	BRCA-C3	C5:BRCA	C1	C19: BRCA (Luminal)	BRCA.LumA	1
TCGA-AR-A24H	BRCA-C5	C4:Pan-GynwithSARC	C1	C19: BRCA (Luminal)	BRCA.LumB	1
TCGA-BH-A0C3	BRCA-C1	C5:BRCA	C1	C25: Pan-SCC (Chr 11 amp)	BRCA.Normal	1
TCGA-LD-A9QF	BRCA-C1	C5:BRCA	C1	C2: BRCA (HER2 amp)	BRCA.Normal
TCGA-D8-A1Y1	BRCA-C5	C5:BRCA	C1	C19: BRCA (Luminal)	BRCA.LumB	1
TCGA-BH-A1FU	BRCA-C3	C5:BRCA	C1	C2: BRCA (HER2 amp)	BRCA.Normal	1
TCGA-E9-A1NF	BRCA-C3	C5:BRCA	C1	C19: BRCA (Luminal)	BRCA.LumB	1
TCGA-EW-A2FR	BRCA-C3	C5:BRCA	C1	C2: BRCA (HER2 amp)	BRCA.Her2	1
TCGA-BH-A0BR	BRCA-C3	C5:BRCA	C1	C19: BRCA (Luminal)	BRCA.LumA	1
TCGA-AC-A5XU	BRCA-C3	C5:BRCA	C1	C19: BRCA (Luminal)	BRCA.LumA	0
TCGA-A8-A076	BRCA-C3	C5:BRCA	C1	C2: BRCA (HER2 amp)	BRCA.LumB	1
TCGA-AR-A24V	BRCA-C3	C5:BRCA	C1	C19: BRCA (Luminal)	BRCA.LumA	1
TCGA-AO-A03O	BRCA-C5	C5:BRCA	C1	C25: Pan-SCC (Chr 11 amp)	BRCA.LumB	1
TCGA-E2-A15S	BRCA-C1	C11:Pan-Gyn	C1	C17: BRCA (Chr 8q amp)	BRCA.LumB	1
TCGA-GM-A2DC	BRCA-C5	C5:BRCA	C1	C19: BRCA (Luminal)	BRCA.LumA	1
TCGA-E9-A1RI	BRCA-C3	C5:BRCA	C1	C19: BRCA (Luminal)	BRCA.LumA	0
TCGA-AN-A0XV	BRCA-C3	C5:BRCA	C1	C19: BRCA (Luminal)	BRCA.LumA	0
TCGA-BH-A0BD	BRCA-C3	C5:BRCA	C1	C25: Pan-SCC (Chr 11 amp)	BRCA.LumB	0
TCGA-AC-A5EH	BRCA-C3	C5:BRCA	C1	C19: BRCA (Luminal)	BRCA.Her2	1
TCGA-AO-A125	BRCA-C1	C10:M	C9	C19: BRCA (Luminal)	BRCA.LumA	0
TCGA-A8-A0A6	BRCA-C1	C5:BRCA	C1	C19: BRCA (Luminal)	BRCA.LumA	1
TCGA-E2-A1IJ	BRCA-C3	C5:BRCA	C1	C19: BRCA (Luminal)	BRCA.LumA	0
TCGA-E2-A10F	BRCA-C3	C5:BRCA	C1	C19: BRCA (Luminal)	BRCA.LumA	0
TCGA-A7-A0CH	BRCA-C3	C5:BRCA	C1	C19: BRCA (Luminal)	BRCA.Normal	0
TCGA-OL-A66K	BRCA-C3	C5:BRCA	C1	C19: BRCA (Luminal)	BRCA.LumA	1
TCGA-W8-A86G	BRCA-C1	C5:BRCA	C1	C19: BRCA (Luminal)	BRCA.LumA	1
TCGA-C8-A12P	BRCA-C3	C3:LUADwithLUSC/THCA	C1	C2: BRCA (HER2 amp)	BRCA.Her2	1
TCGA-E2-A15L	BRCA-C3	C5:BRCA	C1	C19: BRCA (Luminal)	BRCA.LumA	0
TCGA-D8-A1XR	BRCA-C3	C5:BRCA	C1	C19: BRCA (Luminal)	BRCA.LumB	0
TCGA-A2-A0CM	BRCA-C4	C5:BRCA	C1	C27: PAN-SCC (HPV)	BRCA.Basal	1
TCGA-E2-A1BD	BRCA-C3	C5:BRCA	C1	C19: BRCA (Luminal)	BRCA.LumA	1
TCGA-E2-A14Q	BRCA-C1	C5:BRCA	C1	C19: BRCA (Luminal)	BRCA.LumA	0
TCGA-EW-A1P8	BRCA-C4	C4:Pan-GynwithSARC	C1	C10: Pan-SCC	BRCA.Basal	1
TCGA-E2-A56Z	BRCA-C5	C5:BRCA	C1	C17: BRCA (Chr 8q amp)	BRCA.LumB	1
TCGA-A2-A4S0	BRCA-C3	C5:BRCA	C1	C19: BRCA (Luminal)	BRCA.LumA	0
TCGA-AQ-A1H3	BRCA-C3	C5:BRCA	C1	C19: BRCA (Luminal)	BRCA.LumA	0
TCGA-LL-A5YM	BRCA-C4	C5:BRCA	C1	C2: BRCA (HER2 amp)	BRCA.LumB	1
TCGA-E2-A3DX	BRCA-C1	C5:BRCA	C1	C19: BRCA (Luminal)	BRCA.LumA	0
TCGA-BH-A1FD	BRCA-C3	C5:BRCA	C1		BRCA.Normal	0
TCGA-LL-A5YP	BRCA-C2	C4:Pan-GynwithSARC	C1	C13: Mixed (Chr 8 del)	BRCA.Basal	1
TCGA-AN-A0AL	BRCA-C5	C5:BRCA	C1	C7: Mixed (Chr 9 del)	BRCA.Basal	0
TCGA-A8-A07Z	BRCA-C1	C5:BRCA	C1	C19: BRCA (Luminal)	BRCA.LumA	1
TCGA-A2-A0CR	BRCA-C1	C5:BRCA	C1	C20: Mixed (Stromal/Immune)	BRCA.LumA	0
TCGA-E9-A1R0	BRCA-C1	C5:BRCA	C1	C19: BRCA (Luminal)	BRCA.LumA	0
TCGA-AR-A1AL	BRCA-C1	C5:BRCA	C1	C19: BRCA (Luminal)	BRCA.LumA	0
TCGA-LD-A7W5	BRCA-C1	C5:BRCA	C1	C19: BRCA (Luminal)	BRCA.LumA	1
TCGA-E9-A22H	BRCA-C3	C5:BRCA	C1	C19: BRCA (Luminal)	BRCA.LumB	0
TCGA-AR-A2LN	BRCA-C1	C5:BRCA	C1	C19: BRCA (Luminal)	BRCA.LumA	0
TCGA-JL-A3YX	BRCA-C1	C5:BRCA	C1	C19: BRCA (Luminal)	BRCA.LumA	1
TCGA-D8-A27M	BRCA-C3	C3:LUADwithLUSC/THCA	C1	C20: Mixed (Stromal/Immune)	BRCA.Basal	0
TCGA-OL-A66L	BRCA-C1	C4:Pan-GynwithSARC	C1	C19: BRCA (Luminal)	BRCA.LumA	0
TCGA-C8-A27B	BRCA-C4	C4:Pan-GynwithSARC	C10	C13: Mixed (Chr 8 del)	BRCA.Basal	1
TCGA-A8-A08O	BRCA-C5	C5:BRCA	C1	C19: BRCA (Luminal)	BRCA.LumA	0
TCGA-5L-AAT1	BRCA-C1
TCGA-E9-A1R5	BRCA-C3	C5:BRCA	C1	C19: BRCA (Luminal)	BRCA.LumA	1
TCGA-BH-A0BA	BRCA-C1	C5:BRCA	C1	C19: BRCA (Luminal)	BRCA.Normal	1
TCGA-A8-A07G	BRCA-C3	C5:BRCA	C1	C19: BRCA (Luminal)	BRCA.LumA	0
TCGA-D8-A13Y	BRCA-C3	C5:BRCA	C2	C17: BRCA (Chr 8q amp)	BRCA.LumB	1
TCGA-5T-A9QA	BRCA-C4	C4:Pan-GynwithSARC	C14	C17: BRCA (Chr 8q amp)	BRCA.LumB	1
TCGA-D8-A1JL	BRCA-C5	C5:BRCA	C1	C20: Mixed (Stromal/Immune)	BRCA.Basal	1
TCGA-A2-A4RY	BRCA-C1	C1:Pan-Squamous	C1	C19: BRCA (Luminal)	BRCA.Normal	0
TCGA-AC-A3YI	BRCA-C1	C5:BRCA	C1	C19: BRCA (Luminal)	BRCA.Normal	0
TCGA-LD-A7W6	BRCA-C1	C5:BRCA	C1	C17: BRCA (Chr 8q amp)	BRCA.LumA	0
TCGA-AC-A3BB	BRCA-C3	C5:BRCA	C1	C19: BRCA (Luminal)	BRCA.LumA	1
TCGA-A2-A3KD	BRCA-C1	C5:BRCA	C1	C19: BRCA (Luminal)	BRCA.LumA	0
TCGA-BH-A0B3	BRCA-C4	C5:BRCA	C5	C20: Mixed (Stromal/Immune)	BRCA.Normal	0
TCGA-A2-A0CY	BRCA-C4	C4:Pan-GynwithSARC	C10		BRCA.LumB
TCGA-D8-A27G	BRCA-C3	C5:BRCA	C1	C19: BRCA (Luminal)	BRCA.LumA	0
TCGA-D8-A27T	BRCA-C3	C5:BRCA	C1	C19: BRCA (Luminal)	BRCA.LumA	1
TCGA-E9-A1NH	BRCA-C3	C5:BRCA	C1	C19: BRCA (Luminal)	BRCA.LumA	1
TCGA-WT-AB44	BRCA-C3	C5:BRCA	C1	C19: BRCA (Luminal)	BRCA.LumA	1
TCGA-LL-A5YL	BRCA-C1	C5:BRCA	C1	C19: BRCA (Luminal)	BRCA.LumA	0
TCGA-D8-A13Z	BRCA-C3	C5:BRCA	C1	C13: Mixed (Chr 8 del)	BRCA.Her2	1
TCGA-C8-A274	BRCA-C3	C5:BRCA	C1	C19: BRCA (Luminal)	BRCA.LumB	1
TCGA-AO-A0J6	BRCA-C3	C5:BRCA	C10	C10: Pan-SCC	BRCA.Basal	0
TCGA-BH-A0B5	BRCA-C1	C5:BRCA	C1	C19: BRCA (Luminal)	BRCA.LumA	1
TCGA-AR-A0TW	BRCA-C5	C5:BRCA	C1		BRCA.LumA	1
TCGA-D8-A147	BRCA-C2	C11:Pan-Gyn	C1	C20: Mixed (Stromal/Immune)	BRCA.Basal	1
TCGA-BH-A18G	BRCA-C3	C5:BRCA	C1	C19: BRCA (Luminal)	BRCA.Basal	0
TCGA-D8-A4Z1	BRCA-C1	C10:M	C1	C19: BRCA (Luminal)	BRCA.LumA	0
TCGA-EW-A1P4	BRCA-C4	C4:Pan-GynwithSARC	C5	C10: Pan-SCC	BRCA.Basal	1
TCGA-PL-A8LX	BRCA-C2	C11:Pan-Gyn	C1	C19: BRCA (Luminal)	BRCA.LumA	1
TCGA-A8-A095	BRCA-C3	C5:BRCA	C1	C19: BRCA (Luminal)	BRCA.LumB	0
TCGA-S3-AA14	BRCA-C3	C5:BRCA	C1	C2: BRCA (HER2 amp)	BRCA.LumA	0
TCGA-EW-A1PF	BRCA-C3	C5:BRCA	C1	C19: BRCA (Luminal)	BRCA.LumA	0
TCGA-C8-A12O	BRCA-C5	C5:BRCA	C1	C17: BRCA (Chr 8q amp)	BRCA.LumA	1
TCGA-D8-A27V	BRCA-C1	C5:BRCA	C1	C19: BRCA (Luminal)	BRCA.LumA	1
TCGA-E2-A150	BRCA-C4	C4:Pan-GynwithSARC	C1	C25: Pan-SCC (Chr 11 amp)	BRCA.Basal	1
TCGA-A8-A086	BRCA-C5	C5:BRCA	C1	C17: BRCA (Chr 8q amp)	BRCA.LumA	1
TCGA-BH-A0DK	BRCA-C1	C5:BRCA	C1	C19: BRCA (Luminal)	BRCA.LumA	0
TCGA-E2-A576	BRCA-C1	C5:BRCA	C1	C17: BRCA (Chr 8q amp)	BRCA.LumA	0
TCGA-D8-A1JB	BRCA-C1	C5:BRCA	C1	C19: BRCA (Luminal)	BRCA.LumA	0
TCGA-E9-A5FK	BRCA-C1	C5:BRCA	C1		BRCA.LumA
TCGA-OK-A5Q2	BRCA-C1	C5:BRCA	C1		BRCA.LumA	0
TCGA-GM-A2DF	BRCA-C2	C11:Pan-Gyn	C1	C14: LUAD	BRCA.Basal	1
TCGA-AR-A0TQ	BRCA-C5	C5:BRCA	C1	C2: BRCA (HER2 amp)	BRCA.LumB	1
TCGA-E2-A573	BRCA-C4	C4:Pan-GynwithSARC	C5	C20: Mixed (Stromal/Immune)	BRCA.Basal	1
TCGA-4H-AAAK	BRCA-C3	C5:BRCA	C1	C19: BRCA (Luminal)	BRCA.LumA	0
TCGA-D8-A1X6	BRCA-C5	C5:BRCA	C1	C17: BRCA (Chr 8q amp)	BRCA.LumB	1
TCGA-BH-A1ES	BRCA-C5	C5:BRCA	C1	C17: BRCA (Chr 8q amp)	BRCA.LumA	0
TCGA-BH-A0H5	BRCA-C1	C5:BRCA	C1	C20: Mixed (Stromal/Immune)	BRCA.Normal	0
TCGA-BH-A1FB	BRCA-C1	C5:BRCA	C1	C19: BRCA (Luminal)	BRCA.Normal
TCGA-C8-A12K	BRCA-C4	C5:BRCA	C1	C20: Mixed (Stromal/Immune)	BRCA.Basal	0
TCGA-A2-A1FV	BRCA-C1	C5:BRCA	C1	C17: BRCA (Chr 8q amp)	BRCA.LumA	0
TCGA-E2-A1LB	BRCA-C3	C5:BRCA	C1	C2: BRCA (HER2 amp)	BRCA.Normal	0
TCGA-E9-A1N6	BRCA-C3	C5:BRCA	C1	C2: BRCA (HER2 amp)	BRCA.Normal	1
TCGA-D8-A1XO	BRCA-C3	C5:BRCA	C1	C19: BRCA (Luminal)	BRCA.LumA	0
TCGA-A8-A07I	BRCA-C3	C5:BRCA	C1	C2: BRCA (HER2 amp)	BRCA.Her2	0
TCGA-AO-A12D	BRCA-C3	C5:BRCA	C1	C2: BRCA (HER2 amp)	BRCA.Her2	1
TCGA-D8-A27I	BRCA-C1	C5:BRCA	C1	C19: BRCA (Luminal)	BRCA.LumA	0
TCGA-A8-A0AD	BRCA-C3	C5:BRCA	C1	C19: BRCA (Luminal)	BRCA.LumA	0
TCGA-E9-A5UP	BRCA-C2	C11:Pan-Gyn	C10	C17: BRCA (Chr 8q amp)	BRCA.LumA	1
TCGA-A8-A06T	BRCA-C5	C5:BRCA	C1	C19: BRCA (Luminal)	BRCA.LumA	1
TCGA-E2-A1LI	BRCA-C2	C11:Pan-Gyn	C1	C13: Mixed (Chr 8 del)	BRCA.Basal	1
TCGA-BH-A0BG	BRCA-C2	C5:BRCA	C1	C13: Mixed (Chr 8 del)	BRCA.Basal	1
TCGA-A2-A0EU	BRCA-C5	C5:BRCA	C1	C17: BRCA (Chr 8q amp)	BRCA.LumA	1
TCGA-EW-A2FS	BRCA-C5	C5:BRCA	C1	C19: BRCA (Luminal)	BRCA.LumA	0
TCGA-B6-A0IA	BRCA-C5	C5:BRCA	C1	C17: BRCA (Chr 8q amp)	BRCA.LumA	0
TCGA-EW-A1J6	BRCA-C5	C5:BRCA	C1	C19: BRCA (Luminal)	BRCA.LumB	1
TCGA-A8-A075	BRCA-C3	C5:BRCA	C1	C19: BRCA (Luminal)	BRCA.LumB	1
TCGA-E2-A15H	BRCA-C3	C5:BRCA	C1	C2: BRCA (HER2 amp)	BRCA.LumA	1
TCGA-BH-A0B8	BRCA-C3	C5:BRCA	C1		BRCA.Normal
TCGA-C8-A8HP	BRCA-C4	C4:Pan-GynwithSARC	C1	C2: BRCA (HER2 amp)	BRCA.Her2	0
TCGA-A8-A06N	BRCA-C5	C11:Pan-Gyn	C14	C17: BRCA (Chr 8q amp)	BRCA.LumB	1
TCGA-A7-A5ZX	BRCA-C1	C5:BRCA	C1	C19: BRCA (Luminal)	BRCA.LumA	0
TCGA-BH-A0HB	BRCA-C5	C5:BRCA	C1	C19: BRCA (Luminal)	BRCA.LumA	0
TCGA-B6-A0WT	BRCA-C3	C5:BRCA	C1	C17: BRCA (Chr 8q amp)	BRCA.LumA	0
TCGA-A8-A09D	BRCA-C3	C5:BRCA	C1	C19: BRCA (Luminal)	BRCA.LumA	0
TCGA-A7-A0CG	BRCA-C1	C5:BRCA	C1	C19: BRCA (Luminal)	BRCA.LumA	0
TCGA-BH-A0DT	BRCA-C1	C5:BRCA	C1	C19: BRCA (Luminal)	BRCA.Normal	1
TCGA-AR-A5QP	BRCA-C5	C5:BRCA	C1	C19: BRCA (Luminal)	BRCA.LumA	0
TCGA-C8-A133	BRCA-C4	C4:Pan-GynwithSARC	C14	C19: BRCA (Luminal)	BRCA.LumA	0
TCGA-A2-A0ET	BRCA-C5	C5:BRCA	C14	C19: BRCA (Luminal)	BRCA.LumA	1
TCGA-LD-A66U	BRCA-C1	C5:BRCA	C1	C19: BRCA (Luminal)	BRCA.LumA	0
TCGA-A8-A08J	BRCA-C3	C5:BRCA	C1	C2: BRCA (HER2 amp)	BRCA.Her2	1
TCGA-A2-A0T1	BRCA-C4	C4:Pan-GynwithSARC	C1	C2: BRCA (HER2 amp)	BRCA.Her2	1
TCGA-E9-A227	BRCA-C3	C5:BRCA	C1	C19: BRCA (Luminal)	BRCA.LumA	0
TCGA-LL-A9Q3	BRCA-C3	C5:BRCA	C1	C17: BRCA (Chr 8q amp)	BRCA.LumA	1
TCGA-B6-A1KF	BRCA-C4	C4:Pan-GynwithSARC	C1	C2: BRCA (HER2 amp)	BRCA.Basal	1
TCGA-OL-A66J	BRCA-C1	C5:BRCA	C1	C17: BRCA (Chr 8q amp)	BRCA.LumA	0
TCGA-E9-A295	BRCA-C5	C5:BRCA	C1	C19: BRCA (Luminal)	BRCA.LumA	1
TCGA-HN-A2OB	BRCA-C1	C5:BRCA	C1		BRCA.LumA	0
TCGA-AC-A2QH	BRCA-C2	C11:Pan-Gyn	C7	C23: GBM/LGG (IDH1 wt)	BRCA.Basal	1
TCGA-A2-A0T3	BRCA-C1	C5:BRCA	C1	C17: BRCA (Chr 8q amp)	BRCA.LumB	1
TCGA-BH-A18P	BRCA-C3	C5:BRCA	C1	C19: BRCA (Luminal)	BRCA.Normal	0
TCGA-BH-A0HQ	BRCA-C1	C5:BRCA	C1	C19: BRCA (Luminal)	BRCA.LumA	1
TCGA-A8-A091	BRCA-C5	C5:BRCA	C1	C17: BRCA (Chr 8q amp)	BRCA.LumA	1
TCGA-A1-A0SH	BRCA-C3	C5:BRCA	C1	C19: BRCA (Luminal)	BRCA.LumA	0
TCGA-AR-A0TR	BRCA-C4	C10:M	C14	C19: BRCA (Luminal)	BRCA.LumA	1
TCGA-BH-A0RX	BRCA-C5	C5:BRCA	C1	C20: Mixed (Stromal/Immune)	BRCA.Basal
TCGA-AC-A3TM	BRCA-C1	C5:BRCA	C1	C19: BRCA (Luminal)	BRCA.LumA	0
TCGA-PL-A8LY	BRCA-C1	C9:THYM/TGCT	C8	C20: Mixed (Stromal/Immune)	BRCA.Normal	0
TCGA-A8-A093	BRCA-C3	C5:BRCA	C1	C25: Pan-SCC (Chr 11 amp)	BRCA.LumA	1
TCGA-AN-A0AS	BRCA-C3	C5:BRCA	C1	C13: Mixed (Chr 8 del)	BRCA.LumA	1
TCGA-BH-A1EO	BRCA-C3	C5:BRCA	C1	C17: BRCA (Chr 8q amp)	BRCA.LumA	1
TCGA-C8-A275	BRCA-C3	C5:BRCA	C1	C2: BRCA (HER2 amp)	BRCA.Her2	0
TCGA-A2-A0CW	BRCA-C4	C5:BRCA	C1	C19: BRCA (Luminal)	BRCA.LumB	1
TCGA-A2-A0ER	BRCA-C3	C5:BRCA	C1	C17: BRCA (Chr 8q amp)	BRCA.LumA	0
TCGA-JL-A3YW	BRCA-C3	C5:BRCA	C1	C20: Mixed (Stromal/Immune)	BRCA.Her2	1
TCGA-BH-A209	BRCA-C5	C5:BRCA	C1	C14: LUAD	BRCA.Normal	1
TCGA-GM-A3NW	BRCA-C5	C11:Pan-Gyn	C1	C17: BRCA (Chr 8q amp)	BRCA.LumA	0
TCGA-AN-A0XR	BRCA-C3	C5:BRCA	C1	C19: BRCA (Luminal)	BRCA.LumB	0
TCGA-C8-A1HL	BRCA-C3	C5:BRCA	C1	C2: BRCA (HER2 amp)	BRCA.LumB	1
TCGA-BH-A18T	BRCA-C4	C4:Pan-GynwithSARC	C1	C13: Mixed (Chr 8 del)	BRCA.Basal	1
TCGA-AN-A041	BRCA-C3	C5:BRCA	C1	C19: BRCA (Luminal)	BRCA.LumA	1
TCGA-E9-A228	BRCA-C5	C5:BRCA	C1	C17: BRCA (Chr 8q amp)	BRCA.LumB	0
TCGA-A2-A0YL	BRCA-C1	C5:BRCA	C1	C19: BRCA (Luminal)	BRCA.LumA	0
TCGA-AR-A250	BRCA-C3	C5:BRCA	C1	C2: BRCA (HER2 amp)	BRCA.LumB	1
TCGA-B6-A0X5	BRCA-C3	C5:BRCA	C1	C17: BRCA (Chr 8q amp)	BRCA.LumB	0
TCGA-BH-A1F8	BRCA-C3	C5:BRCA	C1	C17: BRCA (Chr 8q amp)	BRCA.Normal	1
TCGA-BH-A1FM	BRCA-C3	C5:BRCA	C1	C19: BRCA (Luminal)	BRCA.Normal	1
TCGA-A2-A0T5	BRCA-C1	C5:BRCA	C1	C19: BRCA (Luminal)	BRCA.LumA	0
TCGA-GM-A2DM	BRCA-C3	C5:BRCA	C1	C19: BRCA (Luminal)	BRCA.LumA	0
TCGA-EW-A1OV	BRCA-C5	C5:BRCA	C1	C19: BRCA (Luminal)	BRCA.Her2	1
TCGA-A1-A0SG	BRCA-C5	C5:BRCA	C1	C19: BRCA (Luminal)	BRCA.LumA	0
TCGA-BH-A201	BRCA-C1	C5:BRCA	C1	C17: BRCA (Chr 8q amp)	BRCA.LumA	0
TCGA-D8-A73X	BRCA-C3	C5:BRCA	C1	C19: BRCA (Luminal)	BRCA.LumA	0
TCGA-A8-A07E	BRCA-C3	C5:BRCA	C1	C19: BRCA (Luminal)	BRCA.LumA	0
TCGA-B6-A0RG	BRCA-C3	C5:BRCA	C1	C19: BRCA (Luminal)	BRCA.LumA	0
TCGA-D8-A73W	BRCA-C4	C4:Pan-GynwithSARC	C1	C19: BRCA (Luminal)	BRCA.LumA	0
TCGA-E9-A5UO	BRCA-C4	C6:LIHC	C14	C2: BRCA (HER2 amp)	BRCA.LumB	0
TCGA-EW-A1IX	BRCA-C3	C5:BRCA	C1	C17: BRCA (Chr 8q amp)	BRCA.LumA	0
TCGA-E2-A15C	BRCA-C3	C5:BRCA	C1	C19: BRCA (Luminal)	BRCA.LumA	0
TCGA-E2-A572	BRCA-C1	C10:M	C1		BRCA.LumA
TCGA-E9-A54Y	BRCA-C5	C11:Pan-Gyn	C14	C17: BRCA (Chr 8q amp)	BRCA.LumB	0
TCGA-LL-A5YN	BRCA-C1	C5:BRCA	C1	C19: BRCA (Luminal)	BRCA.LumA	0
TCGA-AR-A2LH	BRCA-C1	C10:M	C1	C20: Mixed (Stromal/Immune)	BRCA.Normal	0
TCGA-A1-A0SB	BRCA-C1	C2:Pan-GI	C1	C19: BRCA (Luminal)	BRCA.Normal	0
TCGA-B6-A401	BRCA-C1	C5:BRCA	C1	C19: BRCA (Luminal)	BRCA.LumA	1
TCGA-AR-A252	BRCA-C1	C5:BRCA	C1	C19: BRCA (Luminal)	BRCA.LumA	1
TCGA-D8-A1Y0	BRCA-C1	C5:BRCA	C1	C19: BRCA (Luminal)	BRCA.LumA	0
TCGA-AR-A1AK	BRCA-C1	C5:BRCA	C1	C25: Pan-SCC (Chr 11 amp)	BRCA.LumA	1
TCGA-BH-A204	BRCA-C5	C5:BRCA	C1	C17: BRCA (Chr 8q amp)	BRCA.Normal	0
TCGA-BH-A0B9	BRCA-C4	C4:Pan-GynwithSARC	C14	C20: Mixed (Stromal/Immune)	BRCA.Basal	0
TCGA-AO-A12C	BRCA-C3	C5:BRCA	C1		BRCA.LumA
TCGA-AO-A1KO	BRCA-C1	C1:Pan-Squamous	C1	C19: BRCA (Luminal)	BRCA.Normal
TCGA-A8-A08T	BRCA-C3	C5:BRCA	C1	C17: BRCA (Chr 8q amp)	BRCA.LumA	0
TCGA-E2-A14P	BRCA-C1	C3:LUADwithLUSC/THCA	C1	C2: BRCA (HER2 amp)	BRCA.Her2	1
TCGA-B6-A0I6	BRCA-C3	C5:BRCA	C1		BRCA.Basal
TCGA-A8-A08Z	BRCA-C3	C5:BRCA	C1	C19: BRCA (Luminal)	BRCA.LumA	0
TCGA-BH-A0HY	BRCA-C3	C5:BRCA	C1	C2: BRCA (HER2 amp)	BRCA.LumB	1
TCGA-OL-A66H	BRCA-C3	C3:LUADwithLUSC/THCA	C1	C19: BRCA (Luminal)	BRCA.LumA	0
TCGA-C8-A26V	BRCA-C3	C5:BRCA	C1	C19: BRCA (Luminal)	BRCA.LumB	0
TCGA-D8-A1XF	BRCA-C5	C5:BRCA	C1	C17: BRCA (Chr 8q amp)	BRCA.LumB	1
TCGA-B6-A0RP	BRCA-C3	C5:BRCA	C1	C19: BRCA (Luminal)	BRCA.LumA	1
TCGA-S3-A6ZF	BRCA-C5	C5:BRCA	C1	C17: BRCA (Chr 8q amp)	BRCA.LumB	1
TCGA-BH-A0DI	BRCA-C3	C5:BRCA	C1	C17: BRCA (Chr 8q amp)	BRCA.LumA	0
TCGA-AQ-A1H2	BRCA-C5	C5:BRCA	C1	C7: Mixed (Chr 9 del)	BRCA.LumA	0
TCGA-A7-A3RF	BRCA-C3	C5:BRCA	C1	C19: BRCA (Luminal)	BRCA.LumA	0
TCGA-E9-A1R2	BRCA-C3	C5:BRCA	C1	C17: BRCA (Chr 8q amp)	BRCA.LumA	0
TCGA-E2-A1IE	BRCA-C3	C5:BRCA	C1	C17: BRCA (Chr 8q amp)	BRCA.LumA	0
TCGA-C8-A12V	BRCA-C4	C5:BRCA	C1	C20: Mixed (Stromal/Immune)	BRCA.Basal
TCGA-E9-A249	BRCA-C3	C5:BRCA	C1	C19: BRCA (Luminal)	BRCA.LumB	1
TCGA-GM-A2DA	BRCA-C3	C5:BRCA	C1	C19: BRCA (Luminal)	BRCA.LumA	0
TCGA-E2-A1IO	BRCA-C5	C5:BRCA	C1	C19: BRCA (Luminal)	BRCA.LumA	0
TCGA-AR-A0TS	BRCA-C4	C4:Pan-GynwithSARC	C1	C20: Mixed (Stromal/Immune)	BRCA.Basal	1
TCGA-D8-A1JU	BRCA-C3	C5:BRCA	C1	C19: BRCA (Luminal)	BRCA.LumA	0
TCGA-AO-A128	BRCA-C4	C4:Pan-GynwithSARC	C1	C20: Mixed (Stromal/Immune)	BRCA.Basal	1
TCGA-BH-A0HW	BRCA-C5	C11:Pan-Gyn	C14	C17: BRCA (Chr 8q amp)	BRCA.LumB	1
TCGA-BH-A0BM	BRCA-C1	C5:BRCA	C1	C19: BRCA (Luminal)	BRCA.Normal	0
TCGA-A2-A0YG	BRCA-C3	C5:BRCA	C1	C2: BRCA (HER2 amp)	BRCA.LumB	1
TCGA-A2-A0T0	BRCA-C5	C4:Pan-GynwithSARC	C1	C10: Pan-SCC	BRCA.Basal	0
TCGA-C8-A278	BRCA-C3	C5:BRCA	C1	C2: BRCA (HER2 amp)	BRCA.Her2	1
TCGA-A8-A09C	BRCA-C5	C5:BRCA	C1	C25: Pan-SCC (Chr 11 amp)	BRCA.LumB	1
TCGA-GM-A2DI	BRCA-C1	C5:BRCA	C1	C19: BRCA (Luminal)	BRCA.LumA	0
TCGA-E9-A1N8	BRCA-C2	C2:Pan-GI	C1	C13: Mixed (Chr 8 del)	BRCA.Basal	0
TCGA-AN-A0AM	BRCA-C3	C5:BRCA	C1	C19: BRCA (Luminal)	BRCA.LumB	1
TCGA-E9-A2JS	BRCA-C3	C5:BRCA	C1	C17: BRCA (Chr 8q amp)	BRCA.LumB	1
TCGA-E9-A22E	BRCA-C3	C5:BRCA	C1	C14: LUAD	BRCA.LumB	1
TCGA-C8-A12U	BRCA-C4	C4:Pan-GynwithSARC	C14	C19: BRCA (Luminal)	BRCA.LumB	1
TCGA-AO-A1KT	BRCA-C5	C5:BRCA	C1	C17: BRCA (Chr 8q amp)	BRCA.LumB	0
TCGA-A7-A425	BRCA-C1	C5:BRCA	C1	C19: BRCA (Luminal)	BRCA.LumA	1
TCGA-E2-A1B0	BRCA-C3	C5:BRCA	C1	C2: BRCA (HER2 amp)	BRCA.Her2	1
TCGA-A1-A0SO	BRCA-C2	C11:Pan-Gyn	C14	C13: Mixed (Chr 8 del)	BRCA.Basal
TCGA-A2-A0EO	BRCA-C5	C5:BRCA	C1	C19: BRCA (Luminal)	BRCA.LumA	1
TCGA-E9-A1RF	BRCA-C3	C5:BRCA	C1	C14: LUAD	BRCA.LumA	1
TCGA-C8-A1HK	BRCA-C5	C5:BRCA	C1	C17: BRCA (Chr 8q amp)	BRCA.Her2	1
TCGA-BH-A0B0	BRCA-C3	C5:BRCA	C1	C19: BRCA (Luminal)	BRCA.LumA	0
TCGA-E9-A1N9	BRCA-C5	C5:BRCA	C1	C25: Pan-SCC (Chr 11 amp)	BRCA.Normal	1
TCGA-A2-A04N	BRCA-C3	C5:BRCA	C1	C19: BRCA (Luminal)	BRCA.LumA	0
TCGA-BH-A1FG	BRCA-C5	C5:BRCA	C1	C17: BRCA (Chr 8q amp)	BRCA.Normal	0
TCGA-OL-A5S0	BRCA-C2	C11:Pan-Gyn	C1	C13: Mixed (Chr 8 del)	BRCA.Basal	1
TCGA-E9-A1R6	BRCA-C5	C5:BRCA	C1	C19: BRCA (Luminal)	BRCA.LumA	1
TCGA-BH-A1F0	BRCA-C1	C3:LUADwithLUSC/THCA	C1	C20: Mixed (Stromal/Immune)	BRCA.Normal	0
TCGA-D8-A1XC	BRCA-C5	C5:BRCA	C1	C19: BRCA (Luminal)	BRCA.LumA	0
TCGA-A7-A26F	BRCA-C3	C5:BRCA	C5	C19: BRCA (Luminal)	BRCA.Basal	0
TCGA-E9-A1RB	BRCA-C3	C5:BRCA	C1	C19: BRCA (Luminal)	BRCA.Normal	1
TCGA-A1-A0SK	BRCA-C2	C11:Pan-Gyn	C2	C17: BRCA (Chr 8q amp)	BRCA.Basal	1
TCGA-A8-A09M	BRCA-C5	C5:BRCA	C1	C19: BRCA (Luminal)	BRCA.LumB	0
TCGA-A2-A0T6	BRCA-C3	C5:BRCA	C1	C19: BRCA (Luminal)	BRCA.LumA	0
TCGA-GM-A3NY	BRCA-C3	C5:BRCA	C1	C19: BRCA (Luminal)	BRCA.LumA	0
TCGA-E2-A14O	BRCA-C5	C5:BRCA	C1	C25: Pan-SCC (Chr 11 amp)	BRCA.LumB	1
TCGA-E2-A107	BRCA-C1	C5:BRCA	C1	C19: BRCA (Luminal)	BRCA.LumA	1
TCGA-D8-A1X9	BRCA-C5	C5:BRCA	C1	C19: BRCA (Luminal)	BRCA.LumA	0
TCGA-AC-A3QQ	BRCA-C1	C5:BRCA	C1	C2: BRCA (HER2 amp)	BRCA.LumA	0
TCGA-LL-A5YO	BRCA-C4	C3:LUADwithLUSC/THCA	C1	C20: Mixed (Stromal/Immune)	BRCA.Her2
TCGA-B6-A0IN	BRCA-C3	C3:LUADwithLUSC/THCA	C1	C19: BRCA (Luminal)	BRCA.LumB	0
TCGA-D8-A1JA	BRCA-C3	C5:BRCA	C1	C19: BRCA (Luminal)	BRCA.Her2	0
TCGA-V7-A7HQ	BRCA-C5	C5:BRCA	C1	C13: Mixed (Chr 8 del)	BRCA.LumA	0
TCGA-AC-A4ZE	BRCA-C1	C4:Pan-GynwithSARC	C1	C25: Pan-SCC (Chr 11 amp)	BRCA.LumA	0
TCGA-A8-A09B	BRCA-C3	C5:BRCA	C1	C19: BRCA (Luminal)	BRCA.LumA	1
TCGA-E2-A108	BRCA-C1	C5:BRCA	C1	C20: Mixed (Stromal/Immune)	BRCA.Normal	0
TCGA-A7-A26E	BRCA-C3	C5:BRCA	C1		BRCA.LumA	0
TCGA-B6-A0IQ	BRCA-C4	C11:Pan-Gyn	C14	C13: Mixed (Chr 8 del)	BRCA.Basal	0
TCGA-C8-A27A	BRCA-C3	C5:BRCA	C1	C17: BRCA (Chr 8q amp)	BRCA.LumB	1
TCGA-A8-A07B	BRCA-C3	C5:BRCA	C1	C2: BRCA (HER2 amp)	BRCA.LumA	1
TCGA-C8-A26W	BRCA-C1	C5:BRCA	C1	C25: Pan-SCC (Chr 11 amp)	BRCA.LumB	0
TCGA-B6-A0WV	BRCA-C1	C5:BRCA	C1	C19: BRCA (Luminal)	BRCA.LumB	1
TCGA-C8-A1HG	BRCA-C3	C5:BRCA	C1	C17: BRCA (Chr 8q amp)	BRCA.LumB	1
TCGA-EW-A1OY	BRCA-C5	C5:BRCA	C1	C13: Mixed (Chr 8 del)	BRCA.LumB	1
TCGA-BH-A1EU	BRCA-C1	C5:BRCA	C1	C19: BRCA (Luminal)	BRCA.Normal	1
TCGA-B6-A0WW	BRCA-C3	C5:BRCA	C1	C25: Pan-SCC (Chr 11 amp)	BRCA.LumB	0
TCGA-LL-A6FQ	BRCA-C1	C5:BRCA	C1	C19: BRCA (Luminal)	BRCA.LumA	1
TCGA-A7-A2KD	BRCA-C3	C5:BRCA	C1	C2: BRCA (HER2 amp)	BRCA.LumB	1
TCGA-B6-A0WS	BRCA-C3	C5:BRCA	C1	C17: BRCA (Chr 8q amp)	BRCA.LumA	0
TCGA-C8-A273	BRCA-C3	C5:BRCA	C1	C19: BRCA (Luminal)	BRCA.LumA	0
TCGA-D8-A1JJ	BRCA-C3	C5:BRCA	C1	C19: BRCA (Luminal)	BRCA.LumB	1
TCGA-GM-A2DN	BRCA-C1	C5:BRCA	C1	C19: BRCA (Luminal)	BRCA.LumA	0
TCGA-B6-A0RM	BRCA-C5	C5:BRCA	C1	C17: BRCA (Chr 8q amp)	BRCA.LumA	0
TCGA-AO-A0J9	BRCA-C3	C5:BRCA	C1	C19: BRCA (Luminal)	BRCA.LumA	1
TCGA-E2-A156	BRCA-C5	C5:BRCA	C1	C19: BRCA (Luminal)	BRCA.LumA	0
TCGA-A7-A0CD	BRCA-C5	C5:BRCA	C1	C19: BRCA (Luminal)	BRCA.LumA	1
TCGA-A8-A07P	BRCA-C5	C5:BRCA	C1	C2: BRCA (HER2 amp)	BRCA.LumA	0
TCGA-AN-A0FV	BRCA-C3	C5:BRCA	C1	C2: BRCA (HER2 amp)	BRCA.Her2	1
TCGA-D8-A1XT	BRCA-C3	C5:BRCA	C1	C2: BRCA (HER2 amp)	BRCA.Her2	1
TCGA-C8-A1HF	BRCA-C3	C5:BRCA	C1	C2: BRCA (HER2 amp)	BRCA.Her2	1
TCGA-E2-A2P5	BRCA-C3	C5:BRCA	C1	C19: BRCA (Luminal)	BRCA.LumA	1
TCGA-AO-A0JB	BRCA-C1	C1:Pan-Squamous	C1	C19: BRCA (Luminal)	BRCA.Normal	0
TCGA-AC-A8OP	BRCA-C1	C5:BRCA	C1	C19: BRCA (Luminal)	BRCA.LumA	1
TCGA-A2-A1G6	BRCA-C1	C1:Pan-Squamous	C1	C20: Mixed (Stromal/Immune)	BRCA.Normal
TCGA-E2-A1L7	BRCA-C3	C5:BRCA	C1	C19: BRCA (Luminal)	BRCA.Normal	0
TCGA-C8-A26Y	BRCA-C3	C4:Pan-GynwithSARC	C10	C20: Mixed (Stromal/Immune)	BRCA.Her2	1
TCGA-AO-A03P	BRCA-C5	C5:BRCA	C1		BRCA.LumB	0
TCGA-A8-A06R	BRCA-C3	C5:BRCA	C1	C17: BRCA (Chr 8q amp)	BRCA.LumB	1
TCGA-A8-A09T	BRCA-C3	C5:BRCA	C1	C13: Mixed (Chr 8 del)	BRCA.LumA	1
TCGA-BH-A0B6	BRCA-C1
TCGA-A2-A1G4	BRCA-C3	C5:BRCA	C1	C17: BRCA (Chr 8q amp)	BRCA.LumB	0
TCGA-A8-A08B	BRCA-C4	C5:BRCA	C1	C2: BRCA (HER2 amp)	BRCA.Her2	1
TCGA-AN-A0FK	BRCA-C5	C5:BRCA	C1	C19: BRCA (Luminal)	BRCA.LumA	1
TCGA-A8-A08H	BRCA-C1	C5:BRCA	C1	C20: Mixed (Stromal/Immune)	BRCA.Normal	0
TCGA-BH-A1EN	BRCA-C3	C5:BRCA	C1	C17: BRCA (Chr 8q amp)	BRCA.Normal	1
TCGA-E9-A247	BRCA-C1	C5:BRCA	C1	C25: Pan-SCC (Chr 11 amp)	BRCA.LumA	1
TCGA-E2-A15K	BRCA-C3	C5:BRCA	C1	C19: BRCA (Luminal)	BRCA.Normal	0
TCGA-AO-A0JA	BRCA-C3	C5:BRCA	C1	C19: BRCA (Luminal)	BRCA.LumA	0
TCGA-E2-A1B4	BRCA-C1	C5:BRCA	C1	C19: BRCA (Luminal)	BRCA.LumA	0
TCGA-BH-A1FC	BRCA-C3	C4:Pan-GynwithSARC	C14	C17: BRCA (Chr 8q amp)	BRCA.Normal	1
TCGA-A2-A0CK	BRCA-C1	C5:BRCA	C1	C25: Pan-SCC (Chr 11 amp)	BRCA.LumA	0
TCGA-E9-A3X8	BRCA-C1	C5:BRCA	C1	C19: BRCA (Luminal)	BRCA.LumA	1
TCGA-B6-A0RQ	BRCA-C1	C1:Pan-Squamous	C1	C19: BRCA (Luminal)	BRCA.Normal
TCGA-A7-A0DA	BRCA-C5	C5:BRCA	C1	C13: Mixed (Chr 8 del)	BRCA.Basal	1
TCGA-E2-A15E	BRCA-C1	C5:BRCA	C1	C19: BRCA (Luminal)	BRCA.LumA	1
TCGA-AR-A1AX	BRCA-C1	C5:BRCA	C1	C19: BRCA (Luminal)	BRCA.LumA	0
TCGA-AO-A126	BRCA-C3	C5:BRCA	C1	C19: BRCA (Luminal)	BRCA.LumA	0
TCGA-B6-A0IM	BRCA-C3	C5:BRCA	C1	C17: BRCA (Chr 8q amp)	BRCA.LumA	0
TCGA-A1-A0SN	BRCA-C3	C5:BRCA	C1	C2: BRCA (HER2 amp)	BRCA.LumB	1
TCGA-A8-A06Q	BRCA-C3	C5:BRCA	C1	C17: BRCA (Chr 8q amp)	BRCA.LumB	1
TCGA-OL-A5DA	BRCA-C5	C5:BRCA	C1		BRCA.LumA	0
TCGA-E9-A3QA	BRCA-C4	C4:Pan-GynwithSARC	C5	C20: Mixed (Stromal/Immune)	BRCA.Basal	0
TCGA-A7-A13E	BRCA-C4	C2:Pan-GI	C1	C13: Mixed (Chr 8 del)	BRCA.Normal	1
TCGA-E2-A14S	BRCA-C3	C5:BRCA	C1	C19: BRCA (Luminal)	BRCA.LumB	0
TCGA-GM-A5PX	BRCA-C3	C5:BRCA	C1	C19: BRCA (Luminal)	BRCA.LumA	0
TCGA-D8-A1X5	BRCA-C5	C5:BRCA	C1	C2: BRCA (HER2 amp)	BRCA.LumB	1
TCGA-B6-A0RI	BRCA-C3	C5:BRCA	C1	C19: BRCA (Luminal)	BRCA.LumA	0
TCGA-BH-A0W7	BRCA-C3	C5:BRCA	C1	C19: BRCA (Luminal)	BRCA.LumA	1
TCGA-BH-A0EE	BRCA-C1	C3:LUADwithLUSC/THCA	C10	C2: BRCA (HER2 amp)	BRCA.Her2	1
TCGA-A8-A09R	BRCA-C3	C5:BRCA	C1	C2: BRCA (HER2 amp)	BRCA.LumB	1
TCGA-A8-A08C	BRCA-C3	C5:BRCA	C1		BRCA.LumA	1
TCGA-E2-A14V	BRCA-C3	C5:BRCA	C1	C2: BRCA (HER2 amp)	BRCA.Her2	1
TCGA-GI-A2C8	BRCA-C3	C5:BRCA	C1	C19: BRCA (Luminal)	BRCA.LumA	1
TCGA-PL-A8LV	BRCA-C4	C3:LUADwithLUSC/THCA	C1	C22: TGCT	BRCA.Basal	1
TCGA-A2-A0EN	BRCA-C3	C5:BRCA	C1	C19: BRCA (Luminal)	BRCA.LumA	0
TCGA-D8-A1JE	BRCA-C3	C5:BRCA	C1	C19: BRCA (Luminal)	BRCA.LumB	1
TCGA-AC-A62X	BRCA-C2	C11:Pan-Gyn	C4	C8: UCEC	BRCA.Basal	1
TCGA-BH-A28O	BRCA-C1	C5:BRCA	C1	C20: Mixed (Stromal/Immune)	BRCA.Normal	0
TCGA-AR-A24R	BRCA-C5	C5:BRCA	C1	C19: BRCA (Luminal)	BRCA.LumB	1
TCGA-BH-A0HX	BRCA-C5	C5:BRCA	C1	C25: Pan-SCC (Chr 11 amp)	BRCA.LumA	1
TCGA-AO-A0J2	BRCA-C3	C5:BRCA	C1	C13: Mixed (Chr 8 del)	BRCA.Her2	0
TCGA-AR-A2LK	BRCA-C5	C5:BRCA	C1	C25: Pan-SCC (Chr 11 amp)	BRCA.LumB	1
TCGA-OL-A6VO	BRCA-C2	C4:Pan-GynwithSARC	C1	C27: PAN-SCC (HPV)	BRCA.Basal	1
TCGA-B6-A2IU	BRCA-C5	C5:BRCA	C1	C19: BRCA (Luminal)	BRCA.LumA	0
TCGA-PE-A5DE	BRCA-C1	C5:BRCA	C1		BRCA.LumA	1
TCGA-A8-A092	BRCA-C5	C5:BRCA	C1	C13: Mixed (Chr 8 del)	BRCA.LumB	1
TCGA-BH-A0WA	BRCA-C2	C11:Pan-Gyn	C1	C13: Mixed (Chr 8 del)	BRCA.Basal	1
TCGA-A8-A0AB	BRCA-C1	C5:BRCA	C1	C19: BRCA (Luminal)	BRCA.LumA	1
TCGA-AC-A3W7	BRCA-C1	C5:BRCA	C1	C19: BRCA (Luminal)	BRCA.LumA	0
TCGA-EW-A1IY	BRCA-C3	C5:BRCA	C1	C19: BRCA (Luminal)	BRCA.LumB	0
TCGA-AR-A1AQ	BRCA-C4	C4:Pan-GynwithSARC	C1	C20: Mixed (Stromal/Immune)	BRCA.Basal	1
TCGA-BH-A0DX	BRCA-C3	C5:BRCA	C1	C19: BRCA (Luminal)	BRCA.LumA	0
TCGA-PE-A5DC	BRCA-C4	C5:BRCA	C1		BRCA.LumA
TCGA-BH-A0B4	BRCA-C5	C5:BRCA	C1	C19: BRCA (Luminal)	BRCA.LumA	0
TCGA-D8-A3Z5	BRCA-C1	C1:Pan-Squamous	C1	C19: BRCA (Luminal)	BRCA.LumA	0
TCGA-AR-A1AV	BRCA-C3	C5:BRCA	C1	C19: BRCA (Luminal)	BRCA.LumA	1
TCGA-BH-A0HU	BRCA-C3	C5:BRCA	C1	C13: Mixed (Chr 8 del)	BRCA.LumB	0
TCGA-BH-A8FY	BRCA-C1	C10:M	C6	C19: BRCA (Luminal)	BRCA.LumA	0
TCGA-C8-A8HR	BRCA-C1	C5:BRCA	C1	C20: Mixed (Stromal/Immune)	BRCA.Normal	0
TCGA-A8-A084	BRCA-C3
TCGA-E9-A1RH	BRCA-C3	C5:BRCA	C1	C19: BRCA (Luminal)	BRCA.Normal	1
TCGA-BH-A0BZ	BRCA-C3	C5:BRCA	C1	C19: BRCA (Luminal)	BRCA.Normal	1
TCGA-C8-A1HO	BRCA-C5	C5:BRCA	C1	C17: BRCA (Chr 8q amp)	BRCA.LumA	0
TCGA-AR-A5QQ	BRCA-C1	C1:Pan-Squamous	C5	C27: PAN-SCC (HPV)	BRCA.Basal	0
TCGA-B6-A0WX	BRCA-C1	C5:BRCA	C1	C19: BRCA (Luminal)	BRCA.Basal	1
TCGA-XX-A899	BRCA-C1	C3:LUADwithLUSC/THCA	C1	C17: BRCA (Chr 8q amp)	BRCA.LumA	0
TCGA-AC-A23E	BRCA-C3	C5:BRCA	C1	C19: BRCA (Luminal)	BRCA.LumA	1
TCGA-GM-A3XN	BRCA-C1	C5:BRCA	C1	C19: BRCA (Luminal)	BRCA.LumA	0
TCGA-A2-A0CS	BRCA-C3	C5:BRCA	C1	C19: BRCA (Luminal)	BRCA.LumA	1
TCGA-A7-A3J1	BRCA-C1	C5:BRCA	C1	C19: BRCA (Luminal)	BRCA.LumA	0
TCGA-A2-A0D3	BRCA-C3	C5:BRCA	C1	C19: BRCA (Luminal)	BRCA.LumA	0
TCGA-D8-A1JI	BRCA-C3	C5:BRCA	C1	C17: BRCA (Chr 8q amp)	BRCA.LumB	0
TCGA-D8-A27E	BRCA-C3	C5:BRCA	C1	C19: BRCA (Luminal)	BRCA.LumA	0
TCGA-XX-A89A	BRCA-C3	C5:BRCA	C1	C25: Pan-SCC (Chr 11 amp)	BRCA.LumA	1
TCGA-B6-A0X1	BRCA-C4	C4:Pan-GynwithSARC	C10		BRCA.Basal	1
TCGA-D8-A1JP	BRCA-C3	C5:BRCA	C1	C19: BRCA (Luminal)	BRCA.LumA	0
TCGA-BH-A0E2	BRCA-C3	C5:BRCA	C1	C17: BRCA (Chr 8q amp)	BRCA.LumA	0
TCGA-GM-A3XG	BRCA-C1	C8:PRAD	C1	C20: Mixed (Stromal/Immune)	BRCA.LumA
TCGA-EW-A1P0	BRCA-C5	C5:BRCA	C1	C17: BRCA (Chr 8q amp)	BRCA.LumB	0
TCGA-A8-A06P	BRCA-C5	C5:BRCA	C1	C19: BRCA (Luminal)	BRCA.LumA	0
TCGA-A2-A1FX	BRCA-C5	C5:BRCA	C1	C17: BRCA (Chr 8q amp)	BRCA.LumB	1
TCGA-D8-A1XS	BRCA-C3	C5:BRCA	C1	C19: BRCA (Luminal)	BRCA.LumB	0
TCGA-AR-A2LJ	BRCA-C1	C5:BRCA	C1	C2: BRCA (HER2 amp)	BRCA.LumA	0
TCGA-E2-A1BC	BRCA-C3	C5:BRCA	C1	C19: BRCA (Luminal)	BRCA.Normal	0
TCGA-A7-A0CE	BRCA-C4	C5:BRCA	C1	C13: Mixed (Chr 8 del)	BRCA.Normal	0
TCGA-EW-A1J2	BRCA-C1	C5:BRCA	C1	C19: BRCA (Luminal)	BRCA.LumA	0
TCGA-A8-A07O	BRCA-C4	C4:Pan-GynwithSARC	C10	C17: BRCA (Chr 8q amp)	BRCA.Basal	0
TCGA-A2-A0EW	BRCA-C1	C5:BRCA	C1	C19: BRCA (Luminal)	BRCA.LumA	0
TCGA-D8-A140	BRCA-C3	C5:BRCA	C1	C2: BRCA (HER2 amp)	BRCA.LumA	0
TCGA-E9-A229	BRCA-C3	C5:BRCA	C1	C19: BRCA (Luminal)	BRCA.LumA	0
TCGA-D8-A1X8	BRCA-C1	C5:BRCA	C1	C19: BRCA (Luminal)	BRCA.LumA	0
TCGA-D8-A1JK	BRCA-C3	C3:LUADwithLUSC/THCA	C1	C10: Pan-SCC	BRCA.Basal	1
TCGA-B6-A1KN	BRCA-C3	C5:BRCA	C1	C2: BRCA (HER2 amp)	BRCA.LumB	1
TCGA-AC-A3QP	BRCA-C1	C5:BRCA	C1	C19: BRCA (Luminal)	BRCA.LumA	0
TCGA-E2-A106	BRCA-C5	C5:BRCA	C1		BRCA.LumA
TCGA-AO-A0JJ	BRCA-C1	C5:BRCA	C1	C19: BRCA (Luminal)	BRCA.LumA	0
TCGA-GM-A2DK	BRCA-C5	C5:BRCA	C1	C19: BRCA (Luminal)	BRCA.LumA	0
TCGA-3C-AALK	BRCA-C1	C5:BRCA	C1	C2: BRCA (HER2 amp)	BRCA.LumA	0
TCGA-A2-A0YK	BRCA-C1	C5:BRCA	C1	C17: BRCA (Chr 8q amp)	BRCA.Normal	0
TCGA-E2-A1IF	BRCA-C1	C5:BRCA	C1	C19: BRCA (Luminal)	BRCA.LumA	0
TCGA-A8-A06Z	BRCA-C3	C5:BRCA	C1	C13: Mixed (Chr 8 del)	BRCA.LumB	1
TCGA-A2-A25B	BRCA-C5	C5:BRCA	C1	C19: BRCA (Luminal)	BRCA.LumB
TCGA-E2-A1LA	BRCA-C5	C5:BRCA	C1	C19: BRCA (Luminal)	BRCA.LumA	0
TCGA-E9-A22D	BRCA-C5	C5:BRCA	C1	C14: LUAD	BRCA.LumB	1
TCGA-A2-A0EP	BRCA-C3	C3:LUADwithLUSC/THCA	C1	C20: Mixed (Stromal/Immune)	BRCA.LumA
TCGA-BH-A18V	BRCA-C4	C4:Pan-GynwithSARC	C1	C7: Mixed (Chr 9 del)	BRCA.Normal	0
TCGA-BH-A0GZ	BRCA-C3	C5:BRCA	C1	C19: BRCA (Luminal)	BRCA.LumA	0
TCGA-BH-A0W4	BRCA-C1	C5:BRCA	C1	C19: BRCA (Luminal)	BRCA.LumA	0
TCGA-S3-AA15	BRCA-C4	C5:BRCA	C1	C20: Mixed (Stromal/Immune)	BRCA.Basal
TCGA-D8-A1XY	BRCA-C3	C5:BRCA	C1	C19: BRCA (Luminal)	BRCA.LumA	1
TCGA-A1-A0SI	BRCA-C3	C5:BRCA	C1	C19: BRCA (Luminal)	BRCA.LumB	1
TCGA-AN-A0FW	BRCA-C1	C5:BRCA	C1	C19: BRCA (Luminal)	BRCA.LumA	1
TCGA-E9-A1N5	BRCA-C3	C5:BRCA	C1	C19: BRCA (Luminal)	BRCA.Normal	0
TCGA-BH-A0EB	BRCA-C3	C5:BRCA	C1		BRCA.LumA	1
TCGA-A8-A07F	BRCA-C3	C5:BRCA	C1	C19: BRCA (Luminal)	BRCA.LumA	1
TCGA-E9-A6HE	BRCA-C3	C5:BRCA	C1	C19: BRCA (Luminal)	BRCA.LumA	0
TCGA-A7-A6VW	BRCA-C4	C4:Pan-GynwithSARC	C5	C8: UCEC	BRCA.Basal	1
TCGA-AR-A2LR	BRCA-C2
TCGA-AC-A8OS	BRCA-C1	C5:BRCA	C1	C19: BRCA (Luminal)	BRCA.LumA	0
TCGA-E9-A1RE	BRCA-C5	C5:BRCA	C1	C17: BRCA (Chr 8q amp)	BRCA.LumB	1
TCGA-AO-A12A	BRCA-C1	C5:BRCA	C1	C19: BRCA (Luminal)	BRCA.LumA	1
TCGA-E2-A15J	BRCA-C3	C5:BRCA	C1	C19: BRCA (Luminal)	BRCA.LumA	0
TCGA-BH-A0EA	BRCA-C1	C5:BRCA	C1	C19: BRCA (Luminal)	BRCA.LumA	0
TCGA-AR-A256	BRCA-C3	C5:BRCA	C1	C19: BRCA (Luminal)	BRCA.Basal	1
TCGA-BH-A0C0	BRCA-C3	C5:BRCA	C1	C19: BRCA (Luminal)	BRCA.Normal	1
TCGA-PE-A5DD	BRCA-C3	C4:Pan-GynwithSARC	C1		BRCA.LumA	0
TCGA-B6-A0X7	BRCA-C1	C5:BRCA	C1	C19: BRCA (Luminal)	BRCA.LumA	0
TCGA-S3-AA17	BRCA-C4	C5:BRCA	C1	C19: BRCA (Luminal)	BRCA.LumB	0
TCGA-D8-A1JT	BRCA-C5	C5:BRCA	C1	C19: BRCA (Luminal)	BRCA.LumB	1
TCGA-AR-A1AJ	BRCA-C4	C4:Pan-GynwithSARC	C1	C20: Mixed (Stromal/Immune)	BRCA.Basal	1
TCGA-B6-A3ZX	BRCA-C2	C11:Pan-Gyn	C1	C20: Mixed (Stromal/Immune)	BRCA.Basal	1
TCGA-AC-A2FF	BRCA-C1	C5:BRCA	C1	C20: Mixed (Stromal/Immune)	BRCA.Normal	0
TCGA-BH-A1FJ	BRCA-C5	C5:BRCA	C1	C19: BRCA (Luminal)	BRCA.Normal	0
TCGA-AN-A046	BRCA-C3	C5:BRCA	C1	C19: BRCA (Luminal)	BRCA.LumA	0
TCGA-BH-A0DL	BRCA-C1	C5:BRCA	C5	C10: Pan-SCC	BRCA.Normal	0
TCGA-A7-A6VV	BRCA-C4	C2:Pan-GI	C1	C13: Mixed (Chr 8 del)	BRCA.Basal	1
TCGA-A7-A13D	BRCA-C5	C5:BRCA	C1	C13: Mixed (Chr 8 del)	BRCA.Basal	1
TCGA-AQ-A54O	BRCA-C5	C5:BRCA	C1	C19: BRCA (Luminal)	BRCA.LumB	1
TCGA-AC-A3EH	BRCA-C1	C5:BRCA	C1	C19: BRCA (Luminal)	BRCA.LumA	1
TCGA-EW-A1PB	BRCA-C4	C4:Pan-GynwithSARC	C10	C27: PAN-SCC (HPV)	BRCA.Basal	1
TCGA-A8-A07L	BRCA-C3	C5:BRCA	C1	C17: BRCA (Chr 8q amp)	BRCA.LumB	0
TCGA-OL-A5RW	BRCA-C4	C4:Pan-GynwithSARC	C1	C13: Mixed (Chr 8 del)	BRCA.Basal	1
TCGA-AN-A0XL	BRCA-C1	C5:BRCA	C1	C19: BRCA (Luminal)	BRCA.LumA	1
TCGA-AC-A5XS	BRCA-C1	C5:BRCA	C1	C19: BRCA (Luminal)	BRCA.LumA	0
TCGA-A8-A07R	BRCA-C5	C5:BRCA	C1	C19: BRCA (Luminal)	BRCA.Basal	1
TCGA-BH-A0BJ	BRCA-C1	C5:BRCA	C1	C19: BRCA (Luminal)	BRCA.Normal	1
TCGA-E2-A1B5	BRCA-C1	C3:LUADwithLUSC/THCA	C1	C19: BRCA (Luminal)	BRCA.LumA	0
TCGA-BH-A0DP	BRCA-C1	C5:BRCA	C1	C19: BRCA (Luminal)	BRCA.Normal	1
TCGA-E9-A226	BRCA-C3	C5:BRCA	C1	C14: LUAD	BRCA.LumB	0
TCGA-AO-A1KR	BRCA-C4	C1:Pan-Squamous	C10	C13: Mixed (Chr 8 del)	BRCA.Basal	1
TCGA-A8-A096	BRCA-C3	C5:BRCA	C1	C19: BRCA (Luminal)	BRCA.LumB	0
TCGA-AO-A129	BRCA-C2	C11:Pan-Gyn	C5	C13: Mixed (Chr 8 del)	BRCA.Basal	0
TCGA-AC-A2FE	BRCA-C1	C5:BRCA	C1	C19: BRCA (Luminal)	BRCA.LumA	0
TCGA-AR-A1AU	BRCA-C1	C5:BRCA	C1	C19: BRCA (Luminal)	BRCA.LumA	0
TCGA-E9-A2JT	BRCA-C4	C3:LUADwithLUSC/THCA	C1	C20: Mixed (Stromal/Immune)	BRCA.LumA	0
TCGA-BH-A8G0	BRCA-C1	C5:BRCA	C1	C20: Mixed (Stromal/Immune)	BRCA.LumA	0
TCGA-D8-A1JF	BRCA-C3	C5:BRCA	C1	C19: BRCA (Luminal)	BRCA.Her2	1
TCGA-E2-A15M	BRCA-C3	C5:BRCA	C1	C19: BRCA (Luminal)	BRCA.Normal	1
TCGA-E2-A1II	BRCA-C2	C5:BRCA	C14	C27: PAN-SCC (HPV)	BRCA.Basal	1
TCGA-E2-A1LS	BRCA-C4	C3:LUADwithLUSC/THCA	C1		BRCA.Normal
TCGA-A2-A3Y0	BRCA-C4	C4:Pan-GynwithSARC	C10	C27: PAN-SCC (HPV)	BRCA.Basal	0
TCGA-A2-A0EQ	BRCA-C5	C4:Pan-GynwithSARC	C1	C19: BRCA (Luminal)	BRCA.Her2	1
TCGA-A2-A3XZ	BRCA-C1	C5:BRCA	C1	C2: BRCA (HER2 amp)	BRCA.Her2	0
TCGA-BH-A0H7	BRCA-C3	C5:BRCA	C1	C17: BRCA (Chr 8q amp)	BRCA.Normal	1
TCGA-LL-A73Y	BRCA-C2	C11:Pan-Gyn	C1	C20: Mixed (Stromal/Immune)	BRCA.Basal	1
TCGA-C8-A12W	BRCA-C5	C5:BRCA	C1	C25: Pan-SCC (Chr 11 amp)	BRCA.LumB	1
TCGA-LL-A7T0	BRCA-C5	C5:BRCA	C1	C17: BRCA (Chr 8q amp)	BRCA.LumB	1
TCGA-GM-A2DL	BRCA-C3	C5:BRCA	C1	C19: BRCA (Luminal)	BRCA.LumA	0
TCGA-A7-A26J	BRCA-C3	C5:BRCA	C1		BRCA.LumA	1
TCGA-A2-A0T4	BRCA-C5	C5:BRCA	C1	C19: BRCA (Luminal)	BRCA.LumA	0
TCGA-AC-A6IV	BRCA-C5	C5:BRCA	C1	C20: Mixed (Stromal/Immune)	BRCA.LumA	0
TCGA-E9-A24A	BRCA-C3	C5:BRCA	C1	C19: BRCA (Luminal)	BRCA.LumA	0
TCGA-E2-A159	BRCA-C3	C5:BRCA	C5	C20: Mixed (Stromal/Immune)	BRCA.Basal	1
TCGA-AR-A24U	BRCA-C3	C5:BRCA	C1	C2: BRCA (HER2 amp)	BRCA.Her2	0
TCGA-A1-A0SM	BRCA-C3	C5:BRCA	C1	C2: BRCA (HER2 amp)	BRCA.LumA	0
TCGA-D8-A1XJ	BRCA-C3	C4:Pan-GynwithSARC	C1	C2: BRCA (HER2 amp)	BRCA.Her2	1
TCGA-A2-A0CV	BRCA-C1	C5:BRCA	C1	C19: BRCA (Luminal)	BRCA.LumA	1
TCGA-E2-A1IU	BRCA-C1	C5:BRCA	C1	C25: Pan-SCC (Chr 11 amp)	BRCA.LumA	0
TCGA-AR-A0U3	BRCA-C3	C5:BRCA	C1	C17: BRCA (Chr 8q amp)	BRCA.LumA	1
TCGA-A2-A0T2	BRCA-C4	C5:BRCA	C1	C8: UCEC	BRCA.Basal	1
TCGA-A8-A06U	BRCA-C3	C5:BRCA	C1	C2: BRCA (HER2 amp)	BRCA.LumA	1
TCGA-AR-A24X	BRCA-C3	C5:BRCA	C1	C19: BRCA (Luminal)	BRCA.LumA	0
TCGA-A2-A0YC	BRCA-C3	C5:BRCA	C1	C19: BRCA (Luminal)	BRCA.LumA	0
TCGA-AR-A24S	BRCA-C3	C5:BRCA	C1	C13: Mixed (Chr 8 del)	BRCA.LumB	1
TCGA-BH-A0W5	BRCA-C3	C5:BRCA	C1	C19: BRCA (Luminal)	BRCA.LumA	0
TCGA-AO-A0JD	BRCA-C1	C5:BRCA	C1	C25: Pan-SCC (Chr 11 amp)	BRCA.LumB	0
TCGA-C8-A12Q	BRCA-C3	C5:BRCA	C1	C2: BRCA (HER2 amp)	BRCA.Her2	1
TCGA-D8-A27L	BRCA-C3	C5:BRCA	C1	C19: BRCA (Luminal)	BRCA.LumA	0
TCGA-A7-A4SB	BRCA-C5	C5:BRCA	C1	C25: Pan-SCC (Chr 11 amp)	BRCA.LumA	1
TCGA-D8-A146	BRCA-C3
TCGA-D8-A27K	BRCA-C1	C5:BRCA	C1	C19: BRCA (Luminal)	BRCA.LumA	0
TCGA-A2-A4S3	BRCA-C5	C5:BRCA	C1	C17: BRCA (Chr 8q amp)	BRCA.LumB	0
TCGA-A8-A09X	BRCA-C3	C5:BRCA	C1	C19: BRCA (Luminal)	BRCA.Her2	1
TCGA-BH-A0HK	BRCA-C1	C5:BRCA	C1	C19: BRCA (Luminal)	BRCA.Normal	0
TCGA-LL-A73Z	BRCA-C1	C5:BRCA	C1	C20: Mixed (Stromal/Immune)	BRCA.Normal	1
TCGA-AN-A0XN	BRCA-C3	C5:BRCA	C1	C17: BRCA (Chr 8q amp)	BRCA.LumA	1
TCGA-A1-A0SD	BRCA-C5	C5:BRCA	C1	C19: BRCA (Luminal)	BRCA.LumA	0
TCGA-BH-A18J	BRCA-C3	C5:BRCA	C1	C19: BRCA (Luminal)	BRCA.Normal	0
TCGA-B6-A0IE	BRCA-C1	C5:BRCA	C1	C19: BRCA (Luminal)	BRCA.LumA	1
TCGA-E2-A152	BRCA-C3	C5:BRCA	C1	C2: BRCA (HER2 amp)	BRCA.Her2	1
TCGA-GM-A2D9	BRCA-C3	C5:BRCA	C1	C19: BRCA (Luminal)	BRCA.LumA	0
TCGA-BH-A18M	BRCA-C1	C5:BRCA	C1	C19: BRCA (Luminal)	BRCA.Normal	0
TCGA-BH-A0W3	BRCA-C5	C5:BRCA	C1	C19: BRCA (Luminal)	BRCA.LumB	1
TCGA-C8-A131	BRCA-C3	C5:BRCA	C1	C19: BRCA (Luminal)	BRCA.Basal	1
TCGA-AR-A2LQ	BRCA-C1	C5:BRCA	C1	C19: BRCA (Luminal)	BRCA.Normal	0
TCGA-AC-A2FM	BRCA-C5	C5:BRCA	C1	C19: BRCA (Luminal)	BRCA.Normal	0
TCGA-AN-A0AT	BRCA-C2	C11:Pan-Gyn	C5	C13: Mixed (Chr 8 del)	BRCA.Basal	0
TCGA-A2-A0CX	BRCA-C3	C5:BRCA	C1		BRCA.Her2	1
TCGA-A2-A0CP	BRCA-C1	C5:BRCA	C1	C19: BRCA (Luminal)	BRCA.LumA	0
TCGA-A2-A0CT	BRCA-C5	C5:BRCA	C1	C19: BRCA (Luminal)	BRCA.LumA	1
TCGA-A2-A0SU	BRCA-C5	C5:BRCA	C1	C19: BRCA (Luminal)	BRCA.LumA	0
TCGA-AR-A0U2	BRCA-C5	C5:BRCA	C1	C19: BRCA (Luminal)	BRCA.LumB	1
TCGA-A1-A0SP	BRCA-C2	C11:Pan-Gyn	C1	C20: Mixed (Stromal/Immune)	BRCA.Basal	1
TCGA-C8-A132	BRCA-C1	C5:BRCA	C1	C2: BRCA (HER2 amp)	BRCA.LumA	1
TCGA-A7-A0CJ	BRCA-C3	C5:BRCA	C1	C19: BRCA (Luminal)	BRCA.LumB	1
TCGA-EW-A1OW	BRCA-C2	C11:Pan-Gyn	C1	C19: BRCA (Luminal)	BRCA.Basal	1
TCGA-BH-A1F5	BRCA-C5
TCGA-A8-A082	BRCA-C3	C5:BRCA	C1	C17: BRCA (Chr 8q amp)	BRCA.LumB	0
TCGA-D8-A27H	BRCA-C2	C11:Pan-Gyn	C1	C13: Mixed (Chr 8 del)	BRCA.Basal	0
TCGA-BH-A18K	BRCA-C3	C5:BRCA	C1	C13: Mixed (Chr 8 del)	BRCA.Normal	1
TCGA-C8-A3M8	BRCA-C3	C5:BRCA	C1	C19: BRCA (Luminal)	BRCA.LumB	0
TCGA-C8-A1HE	BRCA-C3	C5:BRCA	C1	C19: BRCA (Luminal)	BRCA.LumA	0
TCGA-AO-A0JG	BRCA-C1	C5:BRCA	C1	C19: BRCA (Luminal)	BRCA.LumA	0
TCGA-AO-A0J8	BRCA-C3	C5:BRCA	C1	C19: BRCA (Luminal)	BRCA.LumA	0
TCGA-D8-A1JC	BRCA-C3	C5:BRCA	C1	C17: BRCA (Chr 8q amp)	BRCA.LumB	1
TCGA-A8-A08L	BRCA-C4	C4:Pan-GynwithSARC	C1	C19: BRCA (Luminal)	BRCA.Her2	0
TCGA-HN-A2NL	BRCA-C2	C11:Pan-Gyn	C14	C10: Pan-SCC	BRCA.Basal	0
TCGA-E2-A1L9	BRCA-C3	C5:BRCA	C1	C19: BRCA (Luminal)	BRCA.LumA	0
TCGA-B6-A0IC	BRCA-C5	C11:Pan-Gyn	C14	C19: BRCA (Luminal)	BRCA.LumA	0
TCGA-E2-A1LE	BRCA-C3	C5:BRCA	C1	C19: BRCA (Luminal)	BRCA.Her2	1
TCGA-A2-A04U	BRCA-C4	C2:Pan-GI	C1	C13: Mixed (Chr 8 del)	BRCA.Basal	1
TCGA-B6-A40B	BRCA-C3	C5:BRCA	C1	C19: BRCA (Luminal)	BRCA.LumA	0
TCGA-D8-A1XL	BRCA-C5	C5:BRCA	C1	C13: Mixed (Chr 8 del)	BRCA.LumB	1
TCGA-C8-A1HM	BRCA-C5	C5:BRCA	C1	C25: Pan-SCC (Chr 11 amp)	BRCA.LumB	1
TCGA-E9-A244	BRCA-C5	C5:BRCA	C1	C13: Mixed (Chr 8 del)	BRCA.Basal	1
TCGA-D8-A141	BRCA-C3	C5:BRCA	C1	C19: BRCA (Luminal)	BRCA.LumA	0
TCGA-AQ-A7U7	BRCA-C3	C5:BRCA	C1	C19: BRCA (Luminal)	BRCA.LumA	0
TCGA-B6-A0IH	BRCA-C1	C5:BRCA	C1	C19: BRCA (Luminal)	BRCA.LumA	1
TCGA-BH-A0H9	BRCA-C1	C5:BRCA	C1	C19: BRCA (Luminal)	BRCA.Normal	1
TCGA-C8-A12Z	BRCA-C3	C5:BRCA	C1	C2: BRCA (HER2 amp)	BRCA.Her2	0
TCGA-C8-A12M	BRCA-C3	C5:BRCA	C1	C19: BRCA (Luminal)	BRCA.LumB	1
TCGA-E2-A10A	BRCA-C3	C5:BRCA	C1	C17: BRCA (Chr 8q amp)	BRCA.LumA	0
TCGA-E2-A15G	BRCA-C3	C5:BRCA	C1	C19: BRCA (Luminal)	BRCA.LumA	1
TCGA-AN-A0XP	BRCA-C3	C5:BRCA	C1	C19: BRCA (Luminal)	BRCA.LumA	1
TCGA-BH-A42T	BRCA-C3	C5:BRCA	C1	C19: BRCA (Luminal)	BRCA.LumB	0
TCGA-OL-A5D7	BRCA-C4	C4:Pan-GynwithSARC	C14		BRCA.Basal	1
TCGA-AC-A6IW	BRCA-C1	C11:Pan-Gyn	C14	C20: Mixed (Stromal/Immune)	BRCA.Basal	1
TCGA-A8-A07W	BRCA-C3	C5:BRCA	C1	C17: BRCA (Chr 8q amp)	BRCA.LumB	1
TCGA-BH-A1FL	BRCA-C3	C5:BRCA	C1	C19: BRCA (Luminal)	BRCA.LumA	0
TCGA-A2-A3XU	BRCA-C4	C11:Pan-Gyn	C10	C13: Mixed (Chr 8 del)	BRCA.Basal	0
TCGA-C8-A1HI	BRCA-C1	C5:BRCA	C1	C19: BRCA (Luminal)	BRCA.LumA	1
TCGA-A8-A081	BRCA-C3	C5:BRCA	C1	C17: BRCA (Chr 8q amp)	BRCA.LumB	1
TCGA-BH-A1FR	BRCA-C5	C5:BRCA	C1	C19: BRCA (Luminal)	BRCA.Normal
TCGA-AN-A0FF	BRCA-C3	C5:BRCA	C1	C19: BRCA (Luminal)	BRCA.LumB	0
TCGA-AC-A2FG	BRCA-C1	C5:BRCA	C1	C19: BRCA (Luminal)	BRCA.LumA	0
TCGA-BH-A0BQ	BRCA-C1	C5:BRCA	C1	C19: BRCA (Luminal)	BRCA.Normal	0
TCGA-A2-A0CO	BRCA-C1	C3:LUADwithLUSC/THCA	C1	C19: BRCA (Luminal)	BRCA.LumA	0
TCGA-A2-A04T	BRCA-C2	C11:Pan-Gyn	C1	C13: Mixed (Chr 8 del)	BRCA.Basal	1
TCGA-LQ-A4E4	BRCA-C3	C5:BRCA	C1	C19: BRCA (Luminal)	BRCA.LumA	0
TCGA-LL-A6FP	BRCA-C5	C5:BRCA	C1	C19: BRCA (Luminal)	BRCA.LumA	1
TCGA-A8-A0A1	BRCA-C3	C5:BRCA	C1	C19: BRCA (Luminal)	BRCA.LumA	0
TCGA-AO-A0J5	BRCA-C5	C5:BRCA	C1	C19: BRCA (Luminal)	BRCA.LumA	0
TCGA-A2-A1G0	BRCA-C1	C5:BRCA	C1	C19: BRCA (Luminal)	BRCA.LumA	1
TCGA-E9-A3HO	BRCA-C1	C5:BRCA	C1		BRCA.LumB	0
TCGA-E2-A14W	BRCA-C3	C5:BRCA	C1	C19: BRCA (Luminal)	BRCA.LumB	0
TCGA-EW-A1P6	BRCA-C5	C5:BRCA	C1	C19: BRCA (Luminal)	BRCA.LumA	0
TCGA-BH-A0DV	BRCA-C3	C5:BRCA	C1	C19: BRCA (Luminal)	BRCA.Normal	0
TCGA-E9-A1N3	BRCA-C3	C5:BRCA	C1	C14: LUAD	BRCA.LumA	0
TCGA-AQ-A04J	BRCA-C4	C3:LUADwithLUSC/THCA	C1	C20: Mixed (Stromal/Immune)	BRCA.Basal	0
TCGA-E9-A1RG	BRCA-C5	C5:BRCA	C1	C19: BRCA (Luminal)	BRCA.LumB	1
TCGA-E2-A14U	BRCA-C1	C8:PRAD	C1	C19: BRCA (Luminal)	BRCA.LumA	0
TCGA-AC-A23G	BRCA-C3	C5:BRCA	C1	C19: BRCA (Luminal)	BRCA.LumA	1
TCGA-A8-A083	BRCA-C3	C5:BRCA	C1	C19: BRCA (Luminal)	BRCA.LumA	0
TCGA-E2-A15T	BRCA-C3	C5:BRCA	C1	C19: BRCA (Luminal)	BRCA.LumB	0
TCGA-E2-A9RU	BRCA-C3	C5:BRCA	C1	C17: BRCA (Chr 8q amp)	BRCA.LumB	1
TCGA-C8-A12N	BRCA-C3	C5:BRCA	C1	C19: BRCA (Luminal)	BRCA.LumA	0
TCGA-B6-A0IB	BRCA-C5	C5:BRCA	C1	C19: BRCA (Luminal)	BRCA.LumB	1
TCGA-EW-A1PD	BRCA-C3	C5:BRCA	C1	C19: BRCA (Luminal)	BRCA.LumA	0
TCGA-AR-A1AP	BRCA-C3	C5:BRCA	C1	C19: BRCA (Luminal)	BRCA.LumA	1
TCGA-C8-A1HN	BRCA-C5	C5:BRCA	C1	C17: BRCA (Chr 8q amp)	BRCA.LumB	1
TCGA-E9-A1NE	BRCA-C1	C5:BRCA	C1	C19: BRCA (Luminal)	BRCA.LumA	0
TCGA-OL-A66N	BRCA-C1	C5:BRCA	C1	C19: BRCA (Luminal)	BRCA.LumA	1
TCGA-AC-A2BM	BRCA-C3	C5:BRCA	C1	C17: BRCA (Chr 8q amp)	BRCA.LumB	1
TCGA-A7-A3J0	BRCA-C4	C4:Pan-GynwithSARC	C1	C19: BRCA (Luminal)	BRCA.LumA	1
TCGA-A7-A3IZ	BRCA-C5	C11:Pan-Gyn	C1	C17: BRCA (Chr 8q amp)	BRCA.LumA	0
TCGA-AO-A03T	BRCA-C1	C1:Pan-Squamous	C1	C19: BRCA (Luminal)	BRCA.Normal	0
TCGA-A8-A06X	BRCA-C3	C5:BRCA	C1		BRCA.LumB	1
TCGA-AO-A0J3	BRCA-C5	C11:Pan-Gyn	C14	C17: BRCA (Chr 8q amp)	BRCA.LumB	1
TCGA-EW-A1PA	BRCA-C5	C5:BRCA	C1	C17: BRCA (Chr 8q amp)	BRCA.LumA	0
TCGA-D8-A142	BRCA-C5	C5:BRCA	C1	C13: Mixed (Chr 8 del)	BRCA.Basal
TCGA-A2-A1G1	BRCA-C3	C5:BRCA	C1	C2: BRCA (HER2 amp)	BRCA.Basal	1
TCGA-EW-A6SA	BRCA-C5	C11:Pan-Gyn	C1	C17: BRCA (Chr 8q amp)	BRCA.LumB	1
TCGA-AC-A3YJ	BRCA-C4	C5:BRCA	C1	C19: BRCA (Luminal)	BRCA.LumA	0
TCGA-E2-A14Y	BRCA-C4	C5:BRCA	C10	C2: BRCA (HER2 amp)	BRCA.Basal	0
TCGA-C8-A1HJ	BRCA-C4	C2:Pan-GI	C1	C8: UCEC	BRCA.Basal	0
TCGA-BH-A0DS	BRCA-C3	C5:BRCA	C1	C19: BRCA (Luminal)	BRCA.LumA	1
TCGA-AN-A04A	BRCA-C3	C5:BRCA	C1	C19: BRCA (Luminal)	BRCA.LumA	1
TCGA-AQ-A0Y5	BRCA-C3	C5:BRCA	C1	C2: BRCA (HER2 amp)	BRCA.LumA	1
TCGA-A8-A0A7	BRCA-C3	C5:BRCA	C1	C19: BRCA (Luminal)	BRCA.Her2	1
TCGA-C8-A12Y	BRCA-C3	C5:BRCA	C1	C25: Pan-SCC (Chr 11 amp)	BRCA.LumA	0
TCGA-LL-A740	BRCA-C3	C5:BRCA	C1	C14: LUAD	BRCA.LumA	0
TCGA-AR-A1AI	BRCA-C4	C5:BRCA	C10	C10: Pan-SCC	BRCA.Basal	1
TCGA-BH-A0BC	BRCA-C1	C5:BRCA	C1	C19: BRCA (Luminal)	BRCA.Normal	0
TCGA-AN-A0FD	BRCA-C5	C5:BRCA	C1	C19: BRCA (Luminal)	BRCA.LumA	0
TCGA-BH-A0B7	BRCA-C1	C5:BRCA	C1	C2: BRCA (HER2 amp)	BRCA.Normal	0
TCGA-EW-A1IZ	BRCA-C5	C11:Pan-Gyn	C1	C19: BRCA (Luminal)	BRCA.LumA	0
TCGA-S3-A6ZH	BRCA-C5	C5:BRCA	C1	C17: BRCA (Chr 8q amp)	BRCA.LumA	1
TCGA-B6-A0I5	BRCA-C1	C5:BRCA	C1	C19: BRCA (Luminal)	BRCA.LumA	0
TCGA-D8-A1JN	BRCA-C1	C3:LUADwithLUSC/THCA	C1	C19: BRCA (Luminal)	BRCA.LumA	0
TCGA-LL-A7SZ	BRCA-C5	C5:BRCA	C1	C25: Pan-SCC (Chr 11 amp)	BRCA.LumA	1
TCGA-A2-A0YI	BRCA-C3	C5:BRCA	C1	C19: BRCA (Luminal)	BRCA.LumA	0
TCGA-A2-A04R	BRCA-C5	C5:BRCA	C1	C19: BRCA (Luminal)	BRCA.LumB	0
TCGA-E2-A15O	BRCA-C1	C5:BRCA	C1	C25: Pan-SCC (Chr 11 amp)	BRCA.LumA	0
TCGA-OL-A6VQ	BRCA-C1	C5:BRCA	C1	C19: BRCA (Luminal)	BRCA.LumA	0
TCGA-C8-A12L	BRCA-C3	C5:BRCA	C5	C2: BRCA (HER2 amp)	BRCA.Her2	1
TCGA-D8-A1XA	BRCA-C3	C5:BRCA	C1	C19: BRCA (Luminal)	BRCA.LumA	1
TCGA-A8-A08R	BRCA-C4	C5:BRCA	C1	C10: Pan-SCC	BRCA.Basal	1
TCGA-OL-A5RZ	BRCA-C5	C5:BRCA	C1	C2: BRCA (HER2 amp)	BRCA.Her2	1
TCGA-E2-A1AZ	BRCA-C3	C5:BRCA	C1	C19: BRCA (Luminal)	BRCA.Basal	1
TCGA-AN-A0FX	BRCA-C2	C11:Pan-Gyn	C1	C19: BRCA (Luminal)	BRCA.Basal	1
TCGA-AO-A12H	BRCA-C5	C5:BRCA	C1	C19: BRCA (Luminal)	BRCA.LumA	0
TCGA-C8-A3M7	BRCA-C1	C10:M	C1	C19: BRCA (Luminal)	BRCA.LumA	0
TCGA-A7-A26I	BRCA-C3	C5:BRCA	C1	C19: BRCA (Luminal)	BRCA.Basal	1
TCGA-AO-A1KQ	BRCA-C3	C5:BRCA	C1	C19: BRCA (Luminal)	BRCA.LumB
TCGA-B6-A0RV	BRCA-C1	C5:BRCA	C1	C17: BRCA (Chr 8q amp)	BRCA.LumA	0
TCGA-AN-A0FT	BRCA-C5	C5:BRCA	C1	C2: BRCA (HER2 amp)	BRCA.LumA	1
TCGA-E2-A1IN	BRCA-C5	C5:BRCA	C1	C19: BRCA (Luminal)	BRCA.LumA	1
TCGA-AR-A24M	BRCA-C3	C5:BRCA	C1	C19: BRCA (Luminal)	BRCA.LumA	0
TCGA-AN-A0AJ	BRCA-C3	C5:BRCA	C1	C25: Pan-SCC (Chr 11 amp)	BRCA.LumB	1
TCGA-BH-A5J0	BRCA-C3	C5:BRCA	C1		BRCA.LumA	1
TCGA-AN-A0G0	BRCA-C2	C11:Pan-Gyn	C1		BRCA.Basal
TCGA-LD-A74U	BRCA-C1	C5:BRCA	C1	C19: BRCA (Luminal)	BRCA.LumA	0
TCGA-A2-A3XW	BRCA-C1	C1:Pan-Squamous	C5	C20: Mixed (Stromal/Immune)	BRCA.Normal
TCGA-A2-A0YE	BRCA-C2	C11:Pan-Gyn	C1		BRCA.Basal	1
TCGA-BH-A0HL	BRCA-C5	C5:BRCA	C1		BRCA.LumA
TCGA-A2-A4S2	BRCA-C1	C5:BRCA	C1	C19: BRCA (Luminal)	BRCA.LumA	1
TCGA-S3-AA0Z	BRCA-C4	C4:Pan-GynwithSARC	C1	C19: BRCA (Luminal)	BRCA.Basal	1
TCGA-A8-A0A4	BRCA-C1	C5:BRCA	C1	C19: BRCA (Luminal)	BRCA.LumA	0
TCGA-A8-A08A	BRCA-C3	C5:BRCA	C1	C19: BRCA (Luminal)	BRCA.LumA	0
TCGA-S3-AA10	BRCA-C2	C11:Pan-Gyn	C5	C20: Mixed (Stromal/Immune)	BRCA.Basal	1
TCGA-A2-A0SV	BRCA-C3	C5:BRCA	C1	C17: BRCA (Chr 8q amp)	BRCA.LumB	1
TCGA-EW-A6S9	BRCA-C3	C5:BRCA	C1	C2: BRCA (HER2 amp)	BRCA.LumA	0
TCGA-A2-A0D1	BRCA-C3	C5:BRCA	C1	C17: BRCA (Chr 8q amp)	BRCA.Her2	0
TCGA-A8-A099	BRCA-C3	C5:BRCA	C1	C19: BRCA (Luminal)	BRCA.LumA	0
TCGA-AC-A3HN	BRCA-C3	C5:BRCA	C1	C19: BRCA (Luminal)	BRCA.LumA	0
TCGA-A7-A4SE	BRCA-C5	C5:BRCA	C1	C13: Mixed (Chr 8 del)	BRCA.Basal	1
TCGA-BH-A5IZ	BRCA-C4	C4:Pan-GynwithSARC	C5		BRCA.Basal	0
TCGA-AC-A3W5	BRCA-C3	C5:BRCA	C1	C2: BRCA (HER2 amp)	BRCA.Her2	1
TCGA-A7-A56D	BRCA-C5	C5:BRCA	C1		BRCA.LumA	1
TCGA-D8-A1XG	BRCA-C5	C5:BRCA	C1	C19: BRCA (Luminal)	BRCA.LumA	0
TCGA-A2-A0ES	BRCA-C1	C1:Pan-Squamous	C1	C19: BRCA (Luminal)	BRCA.LumA	0
TCGA-D8-A1XZ	BRCA-C5	C5:BRCA	C1	C19: BRCA (Luminal)	BRCA.LumB	1
TCGA-LL-A440	BRCA-C1	C5:BRCA	C1	C20: Mixed (Stromal/Immune)	BRCA.LumA	0
TCGA-AR-A24N	BRCA-C3	C5:BRCA	C1	C19: BRCA (Luminal)	BRCA.LumB	0
TCGA-D8-A27W	BRCA-C3	C5:BRCA	C1	C19: BRCA (Luminal)	BRCA.LumB	1
TCGA-D8-A1J9	BRCA-C3	C5:BRCA	C1	C2: BRCA (HER2 amp)	BRCA.LumB	0
TCGA-AN-A0FS	BRCA-C5	C5:BRCA	C1	C19: BRCA (Luminal)	BRCA.LumA	0
TCGA-LL-A6FR	BRCA-C2	C4:Pan-GynwithSARC	C1	C13: Mixed (Chr 8 del)	BRCA.Basal	1
TCGA-B6-A0I8	BRCA-C5	C5:BRCA	C1		BRCA.LumA
TCGA-A8-A06O	BRCA-C3	C5:BRCA	C1	C25: Pan-SCC (Chr 11 amp)	BRCA.LumB	1
TCGA-B6-A0I1	BRCA-C4	C11:Pan-Gyn	C10	C13: Mixed (Chr 8 del)	BRCA.Basal	0
TCGA-AR-A2LL	BRCA-C3
TCGA-BH-A18S	BRCA-C3	C5:BRCA	C1	C19: BRCA (Luminal)	BRCA.Normal	0
TCGA-BH-A0HN	BRCA-C1	C5:BRCA	C1		BRCA.LumA
TCGA-B6-A0IJ	BRCA-C4	C9:THYM/TGCT	C10	C13: Mixed (Chr 8 del)	BRCA.Basal	1
TCGA-A8-A08F	BRCA-C5
TCGA-BH-A202	BRCA-C3	C5:BRCA	C1	C2: BRCA (HER2 amp)	BRCA.LumB	1
TCGA-D8-A27N	BRCA-C3	C5:BRCA	C1	C2: BRCA (HER2 amp)	BRCA.LumB	0
TCGA-B6-A0WY	BRCA-C1	C1:Pan-Squamous	C1	C19: BRCA (Luminal)	BRCA.LumA	1
TCGA-AR-A0TP	BRCA-C2	C11:Pan-Gyn	C7	C13: Mixed (Chr 8 del)	BRCA.Basal	0
TCGA-E2-A570	BRCA-C3	C5:BRCA	C1	C19: BRCA (Luminal)	BRCA.LumA	0
TCGA-AR-A0TY	BRCA-C1	C5:BRCA	C1	C7: Mixed (Chr 9 del)	BRCA.LumB	0
TCGA-A2-A3XT	BRCA-C4	C2:Pan-GI	C1	C19: BRCA (Luminal)	BRCA.Basal	1
TCGA-BH-A18Q	BRCA-C5	C11:Pan-Gyn	C1	C19: BRCA (Luminal)	BRCA.Normal	1
TCGA-A2-A0YJ	BRCA-C2	C11:Pan-Gyn	C1		BRCA.Basal	1
TCGA-A8-A0A9	BRCA-C3	C5:BRCA	C1	C25: Pan-SCC (Chr 11 amp)	BRCA.LumA	1
TCGA-BH-A0HI	BRCA-C3	C5:BRCA	C1	C19: BRCA (Luminal)	BRCA.LumA	0
TCGA-BH-A1ET	BRCA-C3	C5:BRCA	C1	C19: BRCA (Luminal)	BRCA.Normal	0
TCGA-E2-A15I	BRCA-C1	C5:BRCA	C1	C19: BRCA (Luminal)	BRCA.Normal	0
TCGA-A8-A09K	BRCA-C5
TCGA-C8-A8HQ	BRCA-C3	C5:BRCA	C1	C19: BRCA (Luminal)	BRCA.LumB	0
TCGA-AN-A0FJ	BRCA-C4	C4:Pan-GynwithSARC	C1	C10: Pan-SCC	BRCA.Basal	1
TCGA-C8-A135	BRCA-C3	C5:BRCA	C1	C19: BRCA (Luminal)	BRCA.Her2	1
TCGA-B6-A40C	BRCA-C3	C5:BRCA	C1	C19: BRCA (Luminal)	BRCA.LumA	0
TCGA-A2-A4RX	BRCA-C3	C5:BRCA	C1	C20: Mixed (Stromal/Immune)	BRCA.Basal	1
TCGA-C8-A12X	BRCA-C4	C4:Pan-GynwithSARC	C1	C17: BRCA (Chr 8q amp)	BRCA.LumA	0
TCGA-E9-A1RD	BRCA-C3	C5:BRCA	C1	C14: LUAD	BRCA.Normal	0
TCGA-LL-A441	BRCA-C2	C11:Pan-Gyn	C1	C20: Mixed (Stromal/Immune)	BRCA.Normal	1
TCGA-A8-A0A2	BRCA-C5	C5:BRCA	C1	C19: BRCA (Luminal)	BRCA.LumA	1
TCGA-EW-A2FV	BRCA-C1	C5:BRCA	C1	C19: BRCA (Luminal)	BRCA.LumA	1
TCGA-A2-A0SY	BRCA-C5	C5:BRCA	C1	C2: BRCA (HER2 amp)	BRCA.LumA	0
TCGA-E9-A22G	BRCA-C2	C2:Pan-GI	C14	C14: LUAD	BRCA.Basal	0
TCGA-B6-A0IP	BRCA-C5	C5:BRCA	C1	C19: BRCA (Luminal)	BRCA.LumA	0
TCGA-GM-A5PV	BRCA-C1	C8:PRAD	C1	C19: BRCA (Luminal)	BRCA.LumA	0
TCGA-AC-A8OR	BRCA-C4	C5:BRCA	C1	C19: BRCA (Luminal)	BRCA.LumA	0
TCGA-B6-A0I2	BRCA-C4	C4:Pan-GynwithSARC	C10	C13: Mixed (Chr 8 del)	BRCA.Basal	1
TCGA-AC-A3W6	BRCA-C3	C5:BRCA	C1	C19: BRCA (Luminal)	BRCA.LumA	0
TCGA-BH-A28Q	BRCA-C3	C5:BRCA	C1	C19: BRCA (Luminal)	BRCA.LumA	0
TCGA-E2-A574	BRCA-C2	C11:Pan-Gyn	C10	C17: BRCA (Chr 8q amp)	BRCA.Basal	1
TCGA-AR-A255	BRCA-C3	C5:BRCA	C1	C19: BRCA (Luminal)	BRCA.LumA	1
TCGA-E2-A15D	BRCA-C3	C5:BRCA	C1	C19: BRCA (Luminal)	BRCA.LumA	0
TCGA-A2-A4RW	BRCA-C1	C5:BRCA	C1	C19: BRCA (Luminal)	BRCA.LumA	0
TCGA-E9-A1ND	BRCA-C4	C4:Pan-GynwithSARC	C5	C27: PAN-SCC (HPV)	BRCA.Normal	1
TCGA-BH-A18U	BRCA-C3	C5:BRCA	C1	C2: BRCA (HER2 amp)	BRCA.Normal	1
TCGA-EW-A1J3	BRCA-C3	C5:BRCA	C1	C2: BRCA (HER2 amp)	BRCA.LumA	0
TCGA-BH-A0BT	BRCA-C5	C5:BRCA	C1	C17: BRCA (Chr 8q amp)	BRCA.Normal	1
TCGA-E9-A5FL	BRCA-C1	C2:Pan-GI	C5		BRCA.Basal	1
TCGA-BH-A0BF	BRCA-C3	C5:BRCA	C1	C19: BRCA (Luminal)	BRCA.LumB	1
TCGA-EW-A1J1	BRCA-C5	C5:BRCA	C1	C19: BRCA (Luminal)	BRCA.LumA	1
TCGA-E2-A14T	BRCA-C1	C5:BRCA	C1	C19: BRCA (Luminal)	BRCA.LumA	1
TCGA-EW-A1P1	BRCA-C1	C5:BRCA	C1	C20: Mixed (Stromal/Immune)	BRCA.Normal	0
TCGA-AC-A2B8	BRCA-C3	C5:BRCA	C1	C19: BRCA (Luminal)	BRCA.LumA	0
TCGA-AN-A0FL	BRCA-C2	C11:Pan-Gyn	C1	C8: UCEC	BRCA.Basal	0
TCGA-E2-A105	BRCA-C1	C5:BRCA	C1	C17: BRCA (Chr 8q amp)	BRCA.LumA	0
TCGA-E2-A1B1	BRCA-C1	C5:BRCA	C1	C20: Mixed (Stromal/Immune)	BRCA.LumA	0
TCGA-E2-A10B	BRCA-C5	C5:BRCA	C1	C19: BRCA (Luminal)	BRCA.LumA	1
TCGA-A2-A0YD	BRCA-C3	C5:BRCA	C1	C19: BRCA (Luminal)	BRCA.LumA	0
TCGA-EW-A2FW	BRCA-C5	C5:BRCA	C1	C19: BRCA (Luminal)	BRCA.LumB	0
TCGA-BH-A0AY	BRCA-C3	C5:BRCA	C1	C19: BRCA (Luminal)	BRCA.Normal	1
TCGA-UL-AAZ6	BRCA-C1	C5:BRCA	C10	C2: BRCA (HER2 amp)	BRCA.LumA	1
TCGA-E9-A1R4	BRCA-C3	C5:BRCA	C1	C19: BRCA (Luminal)	BRCA.LumB	1
TCGA-AN-A0AR	BRCA-C4	C11:Pan-Gyn	C14	C13: Mixed (Chr 8 del)	BRCA.Basal	0
TCGA-A8-A07S	BRCA-C3	C5:BRCA	C1	C19: BRCA (Luminal)	BRCA.LumB	0
TCGA-D8-A1JM	BRCA-C4	C15:KIRC	C10		BRCA.Basal	1
TCGA-A8-A09Z	BRCA-C3	C5:BRCA	C1	C19: BRCA (Luminal)	BRCA.LumB	0
TCGA-A2-A3XS	BRCA-C4	C2:Pan-GI	C1	C13: Mixed (Chr 8 del)	BRCA.Basal	1
TCGA-AC-A2QJ	BRCA-C4	C4:Pan-GynwithSARC	C5	C3: Mesenchymal (Immune)	BRCA.Basal	1
TCGA-E9-A54X	BRCA-C5	C11:Pan-Gyn	C14	C19: BRCA (Luminal)	BRCA.LumB	0
TCGA-B6-A0IG	BRCA-C1	C5:BRCA	C1	C2: BRCA (HER2 amp)	BRCA.LumA	1
TCGA-AO-A0J7	BRCA-C3	C5:BRCA	C1	C19: BRCA (Luminal)	BRCA.LumB	1
TCGA-B6-A0RH	BRCA-C3	C5:BRCA	C1	C2: BRCA (HER2 amp)	BRCA.Her2	1
TCGA-A2-A4S1	BRCA-C4	C4:Pan-GynwithSARC	C7	C3: Mesenchymal (Immune)	BRCA.Basal	1
TCGA-A2-A0CL	BRCA-C1	C3:LUADwithLUSC/THCA	C1	C19: BRCA (Luminal)	BRCA.Normal	1
TCGA-AN-A04D	BRCA-C4	C10:M	C14	C13: Mixed (Chr 8 del)	BRCA.Basal	0
TCGA-BH-A0HO	BRCA-C3	C5:BRCA	C1	C19: BRCA (Luminal)	BRCA.LumA	0
TCGA-A2-A259	BRCA-C5	C5:BRCA	C1	C19: BRCA (Luminal)	BRCA.LumA	0
TCGA-AR-A1AY	BRCA-C3	C5:BRCA	C1	C19: BRCA (Luminal)	BRCA.Basal	1
TCGA-B6-A0RS	BRCA-C3	C5:BRCA	C1	C13: Mixed (Chr 8 del)	BRCA.Her2	1
TCGA-A1-A0SJ	BRCA-C5	C5:BRCA	C1	C19: BRCA (Luminal)	BRCA.LumA	1
TCGA-A2-A1FZ	BRCA-C3	C5:BRCA	C1	C19: BRCA (Luminal)	BRCA.LumA	0
TCGA-E2-A154	BRCA-C3	C5:BRCA	C1	C19: BRCA (Luminal)	BRCA.LumA	1
TCGA-E9-A22A	BRCA-C3	C5:BRCA	C1	C14: LUAD	BRCA.LumB	0
TCGA-BH-A0HA	BRCA-C3	C5:BRCA	C1	C19: BRCA (Luminal)	BRCA.Normal	0
TCGA-OL-A97C	BRCA-C4	C11:Pan-Gyn	C7	C19: BRCA (Luminal)	BRCA.Normal	0
TCGA-A7-A4SC	BRCA-C1	C5:BRCA	C1		BRCA.LumA
TCGA-AC-A62V	BRCA-C5	C11:Pan-Gyn	C1	C14: LUAD	BRCA.LumB	1
TCGA-A2-A0SW	BRCA-C3	C5:BRCA	C1	C19: BRCA (Luminal)	BRCA.LumB	1
TCGA-B6-A0RO	BRCA-C1	C5:BRCA	C1	C19: BRCA (Luminal)	BRCA.LumA	1
TCGA-AR-A0TX	BRCA-C4	C4:Pan-GynwithSARC	C1	C2: BRCA (HER2 amp)	BRCA.Her2	0
TCGA-AR-A254	BRCA-C3	C5:BRCA	C1	C2: BRCA (HER2 amp)	BRCA.Her2	1
TCGA-S3-AA12	BRCA-C5	C5:BRCA	C1	C17: BRCA (Chr 8q amp)	BRCA.LumA	0
TCGA-BH-A6R9	BRCA-C3	C5:BRCA	C5	C3: Mesenchymal (Immune)	BRCA.Normal	0
TCGA-A2-A0EY	BRCA-C3	C5:BRCA	C1	C2: BRCA (HER2 amp)	BRCA.LumB	1
TCGA-BH-A0DQ	BRCA-C3	C5:BRCA	C1	C19: BRCA (Luminal)	BRCA.LumA	0
TCGA-A2-A0ST	BRCA-C4	C3:LUADwithLUSC/THCA	C1	C20: Mixed (Stromal/Immune)	BRCA.Basal
TCGA-OL-A5D6	BRCA-C3	C5:BRCA	C1		BRCA.Normal	0
TCGA-AR-A1AH	BRCA-C4	C5:BRCA	C1	C10: Pan-SCC	BRCA.Basal	0
TCGA-E9-A1R7	BRCA-C3	C5:BRCA	C1	C19: BRCA (Luminal)	BRCA.Normal	1
TCGA-B6-A0RL	BRCA-C5	C11:Pan-Gyn	C14	C17: BRCA (Chr 8q amp)	BRCA.LumB	0
TCGA-BH-A0BW	BRCA-C2	C11:Pan-Gyn	C1	C10: Pan-SCC	BRCA.Normal	0
TCGA-BH-A0AV	BRCA-C5	C5:BRCA	C1	C13: Mixed (Chr 8 del)	BRCA.Basal	1
TCGA-BH-A1EX	BRCA-C3	C5:BRCA	C1	C19: BRCA (Luminal)	BRCA.LumA	0
TCGA-A2-A25D	BRCA-C5	C5:BRCA	C1	C19: BRCA (Luminal)	BRCA.LumA	0
TCGA-E9-A245	BRCA-C1	C5:BRCA	C1	C19: BRCA (Luminal)	BRCA.LumA	0
TCGA-B6-A0IK	BRCA-C1	C5:BRCA	C1	C19: BRCA (Luminal)	BRCA.Her2	1
TCGA-E2-A1LH	BRCA-C2	C11:Pan-Gyn	C1	C20: Mixed (Stromal/Immune)	BRCA.Normal	1
TCGA-E2-A15R	BRCA-C5	C5:BRCA	C1	C17: BRCA (Chr 8q amp)	BRCA.LumA	0
TCGA-B6-A0IO	BRCA-C5	C5:BRCA	C1	C7: Mixed (Chr 9 del)	BRCA.LumA	1
TCGA-E2-A1B6	BRCA-C2	C11:Pan-Gyn	C14	C20: Mixed (Stromal/Immune)	BRCA.Basal
TCGA-D8-A1JH	BRCA-C3	C5:BRCA	C1	C19: BRCA (Luminal)	BRCA.LumA	0
TCGA-BH-A18I	BRCA-C3	C5:BRCA	C1	C25: Pan-SCC (Chr 11 amp)	BRCA.LumA	0
TCGA-AN-A04C	BRCA-C4	C5:BRCA	C1	C2: BRCA (HER2 amp)	BRCA.Her2	1
TCGA-AR-A1AM	BRCA-C1	C5:BRCA	C1	C19: BRCA (Luminal)	BRCA.LumA	0
TCGA-AC-A2QI	BRCA-C3	C5:BRCA	C1	C19: BRCA (Luminal)	BRCA.LumA	0
TCGA-AC-A2FK	BRCA-C1	C10:M	C1	C20: Mixed (Stromal/Immune)	BRCA.Normal	0
TCGA-A2-A0D2	BRCA-C4	C5:BRCA	C1	C20: Mixed (Stromal/Immune)	BRCA.Basal	1
TCGA-EW-A424	BRCA-C1	C5:BRCA	C1	C19: BRCA (Luminal)	BRCA.LumA	0
TCGA-D8-A1XU	BRCA-C3	C5:BRCA	C1	C19: BRCA (Luminal)	BRCA.LumA	1
TCGA-A8-A07C	BRCA-C2	C5:BRCA	C1		BRCA.Basal
TCGA-A8-A08X	BRCA-C3	C5:BRCA	C1	C2: BRCA (HER2 amp)	BRCA.Her2	1
TCGA-D8-A1XK	BRCA-C4	C4:Pan-GynwithSARC	C5	C8: UCEC	BRCA.Basal	1
TCGA-OL-A66P	BRCA-C4	C4:Pan-GynwithSARC	C1	C20: Mixed (Stromal/Immune)	BRCA.Her2	0
TCGA-MS-A51U	BRCA-C1	C5:BRCA	C1	C19: BRCA (Luminal)	BRCA.LumA	1
TCGA-AN-A0AK	BRCA-C3	C5:BRCA	C1	C19: BRCA (Luminal)	BRCA.LumB	0
TCGA-AR-A1AW	BRCA-C3	C3:LUADwithLUSC/THCA	C1	C19: BRCA (Luminal)	BRCA.LumB	1
TCGA-BH-A0DD	BRCA-C3	C5:BRCA	C1	C2: BRCA (HER2 amp)	BRCA.LumB	1
TCGA-B6-A0X0	BRCA-C1	C1:Pan-Squamous	C1	C19: BRCA (Luminal)	BRCA.LumA	0
TCGA-AC-A6NO	BRCA-C1	C5:BRCA	C1	C19: BRCA (Luminal)	BRCA.LumA	0
TCGA-A2-A25E	BRCA-C5	C5:BRCA	C1	C19: BRCA (Luminal)	BRCA.LumB	0
TCGA-E2-A1LL	BRCA-C1	C1:Pan-Squamous	C5	C10: Pan-SCC	BRCA.Basal	1
TCGA-S3-A6ZG	BRCA-C3	C5:BRCA	C1	C19: BRCA (Luminal)	BRCA.LumA	1
TCGA-AO-A12E	BRCA-C1	C5:BRCA	C1	C19: BRCA (Luminal)	BRCA.LumA	1
TCGA-D8-A1XV	BRCA-C5	C5:BRCA	C1	C19: BRCA (Luminal)	BRCA.LumA	0
TCGA-AO-A03R	BRCA-C1	C5:BRCA	C1	C17: BRCA (Chr 8q amp)	BRCA.Normal	0
TCGA-A8-A08P	BRCA-C3	C5:BRCA	C1		BRCA.LumB
TCGA-A7-A0D9	BRCA-C3	C5:BRCA	C1	C17: BRCA (Chr 8q amp)	BRCA.Normal	0
TCGA-A8-A079	BRCA-C3	C5:BRCA	C1	C25: Pan-SCC (Chr 11 amp)	BRCA.LumB	1
TCGA-A8-A09A	BRCA-C5	C5:BRCA	C1	C17: BRCA (Chr 8q amp)	BRCA.LumA	1
TCGA-BH-A0AW	BRCA-C3	C5:BRCA	C1	C2: BRCA (HER2 amp)	BRCA.Her2	1
TCGA-AN-A0XU	BRCA-C4	C4:Pan-GynwithSARC	C1	C13: Mixed (Chr 8 del)	BRCA.Basal	0
TCGA-3C-AALI	BRCA-C3	C5:BRCA	C1	C2: BRCA (HER2 amp)	BRCA.Her2	1
TCGA-AR-A1AN	BRCA-C3	C5:BRCA	C1	C19: BRCA (Luminal)	BRCA.LumA	0
TCGA-AN-A03X	BRCA-C5	C5:BRCA	C1	C19: BRCA (Luminal)	BRCA.LumA	1
TCGA-AR-A2LE	BRCA-C3	C5:BRCA	C1	C19: BRCA (Luminal)	BRCA.LumA	0
TCGA-BH-A0DZ	BRCA-C3	C5:BRCA	C1	C19: BRCA (Luminal)	BRCA.Normal	0
TCGA-B6-A408	BRCA-C5	C5:BRCA	C1	C17: BRCA (Chr 8q amp)	BRCA.LumA	1
TCGA-AR-A24K	BRCA-C3	C5:BRCA	C1	C19: BRCA (Luminal)	BRCA.LumB	1
TCGA-BH-A1EY	BRCA-C3	C5:BRCA	C1	C19: BRCA (Luminal)	BRCA.LumA	0
TCGA-A8-A09W	BRCA-C5	C5:BRCA	C1		BRCA.LumB	0
TCGA-EW-A1PE	BRCA-C3	C5:BRCA	C1	C19: BRCA (Luminal)	BRCA.LumA	0
TCGA-BH-A8FZ	BRCA-C1	C5:BRCA	C1	C19: BRCA (Luminal)	BRCA.Normal	0
TCGA-E9-A1QZ	BRCA-C1	C5:BRCA	C1	C19: BRCA (Luminal)	BRCA.LumA	1
TCGA-A2-A25F	BRCA-C5	C5:BRCA	C1	C20: Mixed (Stromal/Immune)	BRCA.Basal
TCGA-AO-A0JL	BRCA-C4	C11:Pan-Gyn	C1	C2: BRCA (HER2 amp)	BRCA.Basal	1
TCGA-BH-A0AZ	BRCA-C3	C5:BRCA	C1	C19: BRCA (Luminal)	BRCA.Normal	0
TCGA-A2-A04V	BRCA-C5	C5:BRCA	C1	C17: BRCA (Chr 8q amp)	BRCA.LumA	0
TCGA-D8-A145	BRCA-C1	C5:BRCA	C1	C19: BRCA (Luminal)	BRCA.LumA	0
TCGA-AR-A1AO	BRCA-C1	C5:BRCA	C1	C20: Mixed (Stromal/Immune)	BRCA.Normal	0
TCGA-BH-A203	BRCA-C3	C5:BRCA	C1	C19: BRCA (Luminal)	BRCA.Normal	1
TCGA-AO-A03V	BRCA-C1	C5:BRCA	C1	C19: BRCA (Luminal)	BRCA.LumA	0
TCGA-LL-A50Y	BRCA-C3	C5:BRCA	C1	C19: BRCA (Luminal)	BRCA.LumA	0
TCGA-E2-A1L6	BRCA-C1	C5:BRCA	C1	C19: BRCA (Luminal)	BRCA.LumA	0
TCGA-A2-A0T7	BRCA-C1	C5:BRCA	C1	C19: BRCA (Luminal)	BRCA.LumA	1
TCGA-E2-A153	BRCA-C3	C5:BRCA	C1	C19: BRCA (Luminal)	BRCA.Normal	1
TCGA-AN-A0XS	BRCA-C3	C5:BRCA	C1	C19: BRCA (Luminal)	BRCA.LumA	1
TCGA-AO-A12F	BRCA-C4	C2:Pan-GI	C1	C25: Pan-SCC (Chr 11 amp)	BRCA.Basal	1
TCGA-BH-A0H6	BRCA-C5	C5:BRCA	C1	C17: BRCA (Chr 8q amp)	BRCA.LumA	0
TCGA-E2-A15A	BRCA-C3	C5:BRCA	C1	C17: BRCA (Chr 8q amp)	BRCA.LumB	1
TCGA-EW-A1P5	BRCA-C1	C5:BRCA	C1	C19: BRCA (Luminal)	BRCA.LumA	1
TCGA-AC-A7VC	BRCA-C4	C4:Pan-GynwithSARC	C7	C3: Mesenchymal (Immune)	BRCA.Basal	0
TCGA-A7-A3IY	BRCA-C3	C5:BRCA	C1	C19: BRCA (Luminal)	BRCA.LumA	0
TCGA-A2-A3XX	BRCA-C2	C4:Pan-GynwithSARC	C1	C13: Mixed (Chr 8 del)	BRCA.Basal	1
TCGA-E2-A14N	BRCA-C1	C5:BRCA	C1	C27: PAN-SCC (HPV)	BRCA.Basal	1
TCGA-A7-A4SD	BRCA-C4	C5:BRCA	C1	C20: Mixed (Stromal/Immune)	BRCA.Basal	1
TCGA-D8-A1X7	BRCA-C3	C5:BRCA	C1	C19: BRCA (Luminal)	BRCA.LumB	0
TCGA-AR-A24P	BRCA-C3	C5:BRCA	C1	C19: BRCA (Luminal)	BRCA.LumA	0
TCGA-AR-A0U4	BRCA-C4	C4:Pan-GynwithSARC	C1	C19: BRCA (Luminal)	BRCA.Basal	1
TCGA-E2-A15P	BRCA-C1	C5:BRCA	C1	C19: BRCA (Luminal)	BRCA.LumA	0
TCGA-A7-A26H	BRCA-C3	C5:BRCA	C1	C19: BRCA (Luminal)	BRCA.LumA	0
TCGA-C8-A12T	BRCA-C3	C5:BRCA	C1	C19: BRCA (Luminal)	BRCA.Her2	0
TCGA-A7-A426	BRCA-C1	C5:BRCA	C1	C19: BRCA (Luminal)	BRCA.LumA	0
TCGA-E9-A1R3	BRCA-C3	C5:BRCA	C1	C19: BRCA (Luminal)	BRCA.LumA	1
TCGA-AR-A0TZ	BRCA-C5	C5:BRCA	C1	C19: BRCA (Luminal)	BRCA.LumA	0
TCGA-D8-A143	BRCA-C1	C5:BRCA	C1	C10: Pan-SCC	BRCA.Basal	1
TCGA-AO-A0JC	BRCA-C1	C3:LUADwithLUSC/THCA	C1	C20: Mixed (Stromal/Immune)	BRCA.LumA
TCGA-AC-A23H	BRCA-C3	C5:BRCA	C1	C1: STAD (EBV-CIMP)	BRCA.Normal	1
TCGA-S3-AA11	BRCA-C1	C1:Pan-Squamous	C1	C19: BRCA (Luminal)	BRCA.LumA	0
TCGA-A2-A0YM	BRCA-C5	C5:BRCA	C1	C17: BRCA (Chr 8q amp)	BRCA.Basal	1
TCGA-AR-A0TT	BRCA-C5	C5:BRCA	C1	C19: BRCA (Luminal)	BRCA.LumB	0
TCGA-E9-A3Q9	BRCA-C1	C5:BRCA	C1	C19: BRCA (Luminal)	BRCA.LumA	0
TCGA-BH-AB28	BRCA-C1	C5:BRCA	C1	C19: BRCA (Luminal)	BRCA.LumA	0
TCGA-AC-A2FO	BRCA-C1	C5:BRCA	C1	C19: BRCA (Luminal)	BRCA.LumA	0
TCGA-BH-A0DE	BRCA-C3	C5:BRCA	C1	C19: BRCA (Luminal)	BRCA.LumA	0
TCGA-AO-A03L	BRCA-C1	C5:BRCA	C1	C19: BRCA (Luminal)	BRCA.LumA	1
TCGA-EW-A1PH	BRCA-C2	C11:Pan-Gyn	C1	C17: BRCA (Chr 8q amp)	BRCA.Basal	0
TCGA-OL-A66O	BRCA-C5	C5:BRCA	C1	C25: Pan-SCC (Chr 11 amp)	BRCA.LumA	0

## Sheet: CESC
	colCluster	PanCan colCluster	PanCan mCluster	Hoadley iCluster	TCGA Subtype	High Aneuploidy
TCGA-C5-A3HE	CESC-C3	C10:M	C10	C27: PAN-SCC (HPV)		0
TCGA-JW-A852	CESC-C3	C9:THYM/TGCT	C10	C27: PAN-SCC (HPV)		0
TCGA-C5-A7CM	CESC-C1	C3:LUADwithLUSC/THCA	C10	C27: PAN-SCC (HPV)		0
TCGA-EA-A1QS	CESC-C1	C1:Pan-Squamous	C5	C20: Mixed (Stromal/Immune)		0
TCGA-VS-AA62	CESC-C2	C1:Pan-Squamous	C10	C27: PAN-SCC (HPV)		0
TCGA-EA-A410	CESC-C1	C4:Pan-GynwithSARC	C7	C20: Mixed (Stromal/Immune)		0
TCGA-EX-A1H5	CESC-C2	C1:Pan-Squamous	C10	C27: PAN-SCC (HPV)		1
TCGA-C5-A902	CESC-C2	C9:THYM/TGCT	C10
TCGA-JW-A5VG	CESC-C2	C1:Pan-Squamous	C10	C27: PAN-SCC (HPV)		0
TCGA-ZJ-AAXB	CESC-C1	C5:BRCA	C10	C27: PAN-SCC (HPV)		1
TCGA-C5-A7CL	CESC-C2	C1:Pan-Squamous	C10	C27: PAN-SCC (HPV)		0
TCGA-UC-A7PF	CESC-C3	C1:Pan-Squamous	C10	C27: PAN-SCC (HPV)		0
TCGA-JW-A5VI	CESC-C1	C1:Pan-Squamous	C10	C27: PAN-SCC (HPV)		0
TCGA-MY-A913	CESC-C2	C1:Pan-Squamous	C10	C27: PAN-SCC (HPV)		1
TCGA-Q1-A6DV	CESC-C3	C9:THYM/TGCT	C10	C8: UCEC		0
TCGA-MU-A8JM	CESC-C2	C1:Pan-Squamous	C10	C27: PAN-SCC (HPV)		0
TCGA-VS-A950	CESC-C1	C1:Pan-Squamous	C10	C27: PAN-SCC (HPV)		1
TCGA-EA-A50E	CESC-C1	C5:BRCA	C5	C27: PAN-SCC (HPV)		0
TCGA-C5-A2LS	CESC-C3	C10:M	C10	C8: UCEC		0
TCGA-DS-A7WH	CESC-C1	C5:BRCA	C12	C18: Pan-GI (MSI)		0
TCGA-ZJ-A8QQ	CESC-C2	C1:Pan-Squamous	C10	C27: PAN-SCC (HPV)		0
TCGA-EA-A1QT	CESC-C2	C1:Pan-Squamous	C10	C25: Pan-SCC (Chr 11 amp)		0
TCGA-FU-A3HZ	CESC-C3	C10:M	C10	C8: UCEC		0
TCGA-EK-A3GM	CESC-C3	C10:M	C3	C4: Pan-GI (CRC)		1
TCGA-EK-A2GZ	CESC-C3	C9:THYM/TGCT	C10	C10: Pan-SCC		0
TCGA-DS-A0VM	CESC-C1	C1:Pan-Squamous	C10	C27: PAN-SCC (HPV)		0
TCGA-FU-A57G	CESC-C1	C5:BRCA	C11	C20: Mixed (Stromal/Immune)		0
TCGA-JX-A5QV	CESC-C2	C1:Pan-Squamous	C10	C27: PAN-SCC (HPV)		1
TCGA-LP-A4AV	CESC-C2	C1:Pan-Squamous	C10	C27: PAN-SCC (HPV)		0
TCGA-DG-A2KL	CESC-C1	C5:BRCA	C5	C27: PAN-SCC (HPV)		1
TCGA-MA-AA43	CESC-C1	C1:Pan-Squamous	C5	C27: PAN-SCC (HPV)		1
TCGA-VS-A94W	CESC-C3	C9:THYM/TGCT	C10	C27: PAN-SCC (HPV)		0
TCGA-VS-A9UV	CESC-C2	C1:Pan-Squamous	C10	C27: PAN-SCC (HPV)		0
TCGA-DS-A7WF	CESC-C1	C1:Pan-Squamous	C4	C18: Pan-GI (MSI)		0
TCGA-VS-A9UP	CESC-C1	C11:Pan-Gyn	C4	C10: Pan-SCC		1
TCGA-C5-A7CH	CESC-C2	C1:Pan-Squamous	C10	C27: PAN-SCC (HPV)		1
TCGA-DS-A0VK	CESC-C2	C1:Pan-Squamous	C10	C27: PAN-SCC (HPV)		0
TCGA-EK-A3GK	CESC-C3	C14:KIRP	C10	C27: PAN-SCC (HPV)		0
TCGA-EA-A439	CESC-C1	C5:BRCA	C5	C13: Mixed (Chr 8 del)		1
TCGA-EA-A3HS	CESC-C1	C4:Pan-GynwithSARC	C10	C27: PAN-SCC (HPV)		0
TCGA-VS-A8EB	CESC-C2	C1:Pan-Squamous	C10	C27: PAN-SCC (HPV)		1
TCGA-HM-A3JK	CESC-C1	C5:BRCA	C5	C27: PAN-SCC (HPV)		1
TCGA-BI-A0VR	CESC-C1	C1:Pan-Squamous	C10	C27: PAN-SCC (HPV)		0
TCGA-EA-A43B	CESC-C2	C1:Pan-Squamous	C10	C27: PAN-SCC (HPV)		1
TCGA-ZJ-AAXJ	CESC-C2	C1:Pan-Squamous	C10	C27: PAN-SCC (HPV)		0
TCGA-DS-A3LQ	CESC-C1	C5:BRCA	C5	C27: PAN-SCC (HPV)		1
TCGA-IR-A3LC	CESC-C3	C10:M	C10	C27: PAN-SCC (HPV)		0
TCGA-VS-A9V3	CESC-C1	C10:M	C10	C27: PAN-SCC (HPV)		0
TCGA-C5-A2M1	CESC-C3	C10:M	C10	C18: Pan-GI (MSI)		0
TCGA-Q1-A73S	CESC-C1	C4:Pan-GynwithSARC	C10	C10: Pan-SCC		1
TCGA-VS-A9UQ	CESC-C1	C10:M	C12	C18: Pan-GI (MSI)		0
TCGA-C5-A1MH	CESC-C3	C1:Pan-Squamous	C10	C27: PAN-SCC (HPV)		1
TCGA-DS-A0VL	CESC-C3	C1:Pan-Squamous	C10	C27: PAN-SCC (HPV)		0
TCGA-FU-A23L	CESC-C3	C9:THYM/TGCT	C10	C10: Pan-SCC		1
TCGA-C5-A7UC	CESC-C2	C1:Pan-Squamous	C10	C27: PAN-SCC (HPV)		0
TCGA-EA-A556	CESC-C1	C11:Pan-Gyn	C4	C17: BRCA (Chr 8q amp)		0
TCGA-C5-A2LT	CESC-C2	C1:Pan-Squamous	C5	C27: PAN-SCC (HPV)		1
TCGA-VS-A8EL	CESC-C2	C1:Pan-Squamous	C10	C27: PAN-SCC (HPV)		0
TCGA-C5-A7X5	CESC-C2	C1:Pan-Squamous	C10	C13: Mixed (Chr 8 del)		1
TCGA-VS-A9UU	CESC-C3	C1:Pan-Squamous	C10	C27: PAN-SCC (HPV)		1
TCGA-VS-A9UI	CESC-C2	C9:THYM/TGCT	C10	C27: PAN-SCC (HPV)		1
TCGA-HM-A3JJ	CESC-C1	C1:Pan-Squamous	C5	C27: PAN-SCC (HPV)		1
TCGA-VS-A8EC	CESC-C2	C1:Pan-Squamous	C10	C27: PAN-SCC (HPV)		1
TCGA-C5-A7CG	CESC-C3	C1:Pan-Squamous	C10	C27: PAN-SCC (HPV)		1
TCGA-EK-A2RJ	CESC-C1	C10:M	C10	C27: PAN-SCC (HPV)		1
TCGA-DS-A7WI	CESC-C2	C1:Pan-Squamous	C10	C27: PAN-SCC (HPV)		0
TCGA-JX-A3PZ	CESC-C2	C1:Pan-Squamous	C10	C27: PAN-SCC (HPV)		0
TCGA-ZJ-AAXA	CESC-C1	C4:Pan-GynwithSARC	C10	C27: PAN-SCC (HPV)		1
TCGA-EX-A8YF	CESC-C3	C10:M	C10	C20: Mixed (Stromal/Immune)		0
TCGA-LP-A4AX	CESC-C2	C1:Pan-Squamous	C10	C27: PAN-SCC (HPV)		0
TCGA-VS-A9UH	CESC-C2	C1:Pan-Squamous	C5	C27: PAN-SCC (HPV)		1
TCGA-C5-A8XI	CESC-C3	C1:Pan-Squamous	C10	C27: PAN-SCC (HPV)		0
TCGA-VS-A8QF	CESC-C3	C10:M	C10	C27: PAN-SCC (HPV)		0
TCGA-VS-A94Z	CESC-C3	C1:Pan-Squamous	C10	C27: PAN-SCC (HPV)		0
TCGA-C5-A2M2	CESC-C1	C10:M	C10	C18: Pan-GI (MSI)		0
TCGA-VS-A958	CESC-C1	C10:M	C10	C27: PAN-SCC (HPV)		0
TCGA-EA-A4BA	CESC-C1	C11:Pan-Gyn	C4	C8: UCEC		0
TCGA-VS-A9UJ	CESC-C1	C10:M	C4	C8: UCEC		0
TCGA-FU-A23K	CESC-C1	C4:Pan-GynwithSARC	C10	C27: PAN-SCC (HPV)		0
TCGA-GH-A9DA	CESC-C2	C1:Pan-Squamous	C10	C27: PAN-SCC (HPV)		1
TCGA-EK-A2RN	CESC-C1	C10:M	C10	C27: PAN-SCC (HPV)		1
TCGA-LP-A5U2	CESC-C1	C1:Pan-Squamous	C10	C27: PAN-SCC (HPV)		0
TCGA-ZJ-AB0I	CESC-C2	C1:Pan-Squamous	C10	C27: PAN-SCC (HPV)		0
TCGA-LP-A4AU	CESC-C2	C1:Pan-Squamous	C10	C27: PAN-SCC (HPV)		1
TCGA-C5-A8YT	CESC-C3	C10:M	C4	C20: Mixed (Stromal/Immune)		0
TCGA-VS-A9V0	CESC-C1	C10:M	C4	C13: Mixed (Chr 8 del)		0
TCGA-WL-A834	CESC-C1	C1:Pan-Squamous	C10	C27: PAN-SCC (HPV)		1
TCGA-C5-A1MQ	CESC-C2	C1:Pan-Squamous	C10
TCGA-Q1-A5R3	CESC-C3	C1:Pan-Squamous	C10	C27: PAN-SCC (HPV)		1
TCGA-C5-A8XK	CESC-C2	C1:Pan-Squamous	C10	C27: PAN-SCC (HPV)		0
TCGA-EA-A5ZE	CESC-C1	C1:Pan-Squamous	C10	C27: PAN-SCC (HPV)		0
TCGA-ZJ-AAXT	CESC-C2	C1:Pan-Squamous	C10	C27: PAN-SCC (HPV)		0
TCGA-ZJ-AAXF	CESC-C3	C1:Pan-Squamous	C5	C27: PAN-SCC (HPV)		1
TCGA-DS-A1O9	CESC-C1	C1:Pan-Squamous	C10
TCGA-IR-A3L7	CESC-C3	C10:M	C10	C27: PAN-SCC (HPV)		0
TCGA-HM-A4S6	CESC-C1	C1:Pan-Squamous	C10	C27: PAN-SCC (HPV)		0
TCGA-VS-A9UD	CESC-C3	C1:Pan-Squamous	C10	C27: PAN-SCC (HPV)		1
TCGA-C5-A2LX	CESC-C3	C1:Pan-Squamous	C10	C27: PAN-SCC (HPV)		0
TCGA-C5-A8YR	CESC-C2	C1:Pan-Squamous	C10	C27: PAN-SCC (HPV)		1
TCGA-VS-A8EK	CESC-C3	C1:Pan-Squamous	C10
TCGA-VS-A9UO	CESC-C3	C14:KIRP	C10	C27: PAN-SCC (HPV)		0
TCGA-MA-AA42	CESC-C3	C9:THYM/TGCT	C10	C27: PAN-SCC (HPV)		0
TCGA-VS-A952	CESC-C3	C10:M	C3	C18: Pan-GI (MSI)		0
TCGA-MY-A5BE	CESC-C3	C9:THYM/TGCT	C10	C27: PAN-SCC (HPV)		0
TCGA-VS-A9UR	CESC-C3	C9:THYM/TGCT	C10	C8: UCEC		0
TCGA-C5-A1MN	CESC-C2	C1:Pan-Squamous	C10	C27: PAN-SCC (HPV)		1
TCGA-VS-A94Y	CESC-C2	C1:Pan-Squamous	C10	C10: Pan-SCC		0
TCGA-VS-A9UZ	CESC-C3	C10:M	C4	C18: Pan-GI (MSI)		0
TCGA-MY-A5BD	CESC-C3	C10:M	C10	C27: PAN-SCC (HPV)		0
TCGA-C5-A7XC	CESC-C1	C10:M	C5	C27: PAN-SCC (HPV)		0
TCGA-DS-A1OA	CESC-C1	C2:Pan-GI	C10
TCGA-C5-A3HL	CESC-C2	C1:Pan-Squamous	C10	C27: PAN-SCC (HPV)		0
TCGA-DG-A2KM	CESC-C1	C4:Pan-GynwithSARC	C10	C27: PAN-SCC (HPV)		1
TCGA-FU-A3TQ	CESC-C1	C1:Pan-Squamous	C10	C27: PAN-SCC (HPV)		0
TCGA-Q1-A5R2	CESC-C1	C1:Pan-Squamous	C10	C27: PAN-SCC (HPV)		1
TCGA-EK-A2R9	CESC-C2	C1:Pan-Squamous	C5	C27: PAN-SCC (HPV)		0
TCGA-BI-A20A	CESC-C3	C1:Pan-Squamous	C10	C27: PAN-SCC (HPV)		1
TCGA-JX-A3Q0	CESC-C2	C1:Pan-Squamous	C10	C27: PAN-SCC (HPV)		0
TCGA-C5-A905	CESC-C2	C1:Pan-Squamous	C10
TCGA-C5-A1BJ	CESC-C3	C1:Pan-Squamous	C5	C27: PAN-SCC (HPV)		0
TCGA-EK-A2RE	CESC-C2	C1:Pan-Squamous	C10	C10: Pan-SCC		0
TCGA-DR-A0ZL	CESC-C3	C1:Pan-Squamous	C10	C27: PAN-SCC (HPV)		0
TCGA-C5-A1M9	CESC-C1	C2:Pan-GI	C10	C18: Pan-GI (MSI)		0
TCGA-C5-A1MJ	CESC-C1	C4:Pan-GynwithSARC	C12	C14: LUAD		1
TCGA-PN-A8MA	CESC-C1	C11:Pan-Gyn	C4	C13: Mixed (Chr 8 del)		1
TCGA-EK-A2PM	CESC-C1	C1:Pan-Squamous	C10	C10: Pan-SCC		1
TCGA-VS-A9V4	CESC-C1	C2:Pan-GI	C3	C4: Pan-GI (CRC)		1
TCGA-DS-A0VN	CESC-C2	C1:Pan-Squamous	C10	C27: PAN-SCC (HPV)		1
TCGA-FU-A5XV	CESC-C2	C1:Pan-Squamous	C10	C27: PAN-SCC (HPV)		0
TCGA-EA-A3Y4	CESC-C2	C1:Pan-Squamous	C10	C27: PAN-SCC (HPV)		0
TCGA-C5-A0TN	CESC-C2	C1:Pan-Squamous	C10	C27: PAN-SCC (HPV)		0
TCGA-Q1-A73Q	CESC-C3	C1:Pan-Squamous	C10	C27: PAN-SCC (HPV)		0
TCGA-EA-A3QE	CESC-C3	C1:Pan-Squamous	C10	C27: PAN-SCC (HPV)		0
TCGA-C5-A1ML	CESC-C3	C9:THYM/TGCT	C5	C27: PAN-SCC (HPV)		1
TCGA-VS-A9V1	CESC-C3	C10:M	C10	C27: PAN-SCC (HPV)		0
TCGA-C5-A8ZZ	CESC-C1	C5:BRCA	C5	C27: PAN-SCC (HPV)		0
TCGA-MA-AA3W	CESC-C3	C1:Pan-Squamous	C10	C27: PAN-SCC (HPV)		0
TCGA-EK-A2RC	CESC-C1	C4:Pan-GynwithSARC	C10	C27: PAN-SCC (HPV)		0
TCGA-VS-A9UL	CESC-C2	C1:Pan-Squamous	C4	C2: BRCA (HER2 amp)		1
TCGA-VS-A9V5	CESC-C1	C10:M	C3	C18: Pan-GI (MSI)		0
TCGA-ZJ-A8QO	CESC-C1	C1:Pan-Squamous	C5	C27: PAN-SCC (HPV)		1
TCGA-C5-A7X8	CESC-C1	C10:M	C12	C13: Mixed (Chr 8 del)		1
TCGA-JX-A3Q8	CESC-C3	C11:Pan-Gyn	C4	C18: Pan-GI (MSI)		1
TCGA-C5-A1M6	CESC-C1	C1:Pan-Squamous	C10	C27: PAN-SCC (HPV)		1
TCGA-C5-A7UI	CESC-C3	C10:M	C10	C27: PAN-SCC (HPV)		0
TCGA-C5-A7CJ	CESC-C1	C1:Pan-Squamous	C5	C27: PAN-SCC (HPV)		0
TCGA-EK-A2H1	CESC-C2	C1:Pan-Squamous	C5	C27: PAN-SCC (HPV)		0
TCGA-EK-A2R7	CESC-C3	C10:M	C10	C10: Pan-SCC		0
TCGA-IR-A3LK	CESC-C2	C1:Pan-Squamous	C10	C27: PAN-SCC (HPV)		0
TCGA-EK-A2RK	CESC-C2	C1:Pan-Squamous	C10	C27: PAN-SCC (HPV)		1
TCGA-MA-AA3Z	CESC-C3	C1:Pan-Squamous	C10	C27: PAN-SCC (HPV)		0
TCGA-VS-A9UM	CESC-C1	C1:Pan-Squamous	C10	C27: PAN-SCC (HPV)		0
TCGA-EA-A97N	CESC-C1	C1:Pan-Squamous	C5	C27: PAN-SCC (HPV)		1
TCGA-FU-A3HY	CESC-C2	C1:Pan-Squamous	C10	C27: PAN-SCC (HPV)		0
TCGA-JW-A5VH	CESC-C1	C10:M	C10	C8: UCEC		0
TCGA-C5-A1BL	CESC-C3	C1:Pan-Squamous	C10	C27: PAN-SCC (HPV)		1
TCGA-FU-A3YQ	CESC-C1	C10:M	C5	C27: PAN-SCC (HPV)		0
TCGA-R2-A69V	CESC-C3	C1:Pan-Squamous	C10	C27: PAN-SCC (HPV)		0
TCGA-JW-A69B	CESC-C1	C2:Pan-GI	C3	C18: Pan-GI (MSI)		0
TCGA-DS-A1OD	CESC-C3	C10:M	C5
TCGA-VS-A8QH	CESC-C1	C2:Pan-GI	C3	C4: Pan-GI (CRC)		0
TCGA-VS-A957	CESC-C3	C1:Pan-Squamous	C10	C27: PAN-SCC (HPV)		0
TCGA-VS-A94X	CESC-C2	C1:Pan-Squamous	C10	C27: PAN-SCC (HPV)		1
TCGA-EA-A5ZD	CESC-C1	C1:Pan-Squamous	C10	C27: PAN-SCC (HPV)		0
TCGA-C5-A8XH	CESC-C2	C1:Pan-Squamous	C10	C27: PAN-SCC (HPV)		0
TCGA-Q1-A73R	CESC-C1	C10:M	C4	C18: Pan-GI (MSI)		0
TCGA-VS-A8EH	CESC-C3	C1:Pan-Squamous	C10	C27: PAN-SCC (HPV)		0
TCGA-C5-A1ME	CESC-C3	C10:M	C3	C27: PAN-SCC (HPV)		1
TCGA-EK-A2PG	CESC-C3	C9:THYM/TGCT	C10	C27: PAN-SCC (HPV)		1
TCGA-ZJ-AAX8	CESC-C1	C5:BRCA	C5	C27: PAN-SCC (HPV)		0
TCGA-VS-A9U6	CESC-C2	C1:Pan-Squamous	C5	C10: Pan-SCC		0
TCGA-MA-AA3X	CESC-C1	C4:Pan-GynwithSARC	C10	C27: PAN-SCC (HPV)		1
TCGA-JW-A5VK	CESC-C2	C1:Pan-Squamous	C10	C27: PAN-SCC (HPV)		0
TCGA-VS-A9UC	CESC-C1	C10:M	C10	C27: PAN-SCC (HPV)		0
TCGA-C5-A7UH	CESC-C2	C1:Pan-Squamous	C10	C27: PAN-SCC (HPV)		1
TCGA-MA-AA41	CESC-C2	C1:Pan-Squamous	C10	C27: PAN-SCC (HPV)		0
TCGA-C5-A1MI	CESC-C1	C4:Pan-GynwithSARC	C10	C10: Pan-SCC		1
TCGA-VS-A953	CESC-C2	C1:Pan-Squamous	C10	C27: PAN-SCC (HPV)		1
TCGA-VS-A9U7	CESC-C1	C1:Pan-Squamous	C10	C27: PAN-SCC (HPV)		0
TCGA-VS-A8EG	CESC-C3	C10:M	C10	C27: PAN-SCC (HPV)		0
TCGA-DG-A2KJ	CESC-C3	C10:M	C3	C27: PAN-SCC (HPV)		0
TCGA-VS-A8EJ	CESC-C3	C11:Pan-Gyn	C4	C13: Mixed (Chr 8 del)		1
TCGA-Q1-A73O	CESC-C2	C1:Pan-Squamous	C10	C27: PAN-SCC (HPV)		0
TCGA-FU-A40J	CESC-C3	C10:M	C4	C18: Pan-GI (MSI)		1
TCGA-C5-A7X3	CESC-C2	C1:Pan-Squamous	C5	C27: PAN-SCC (HPV)		1
TCGA-EK-A2H0	CESC-C2	C1:Pan-Squamous	C10	C27: PAN-SCC (HPV)		0
TCGA-IR-A3LH	CESC-C2	C1:Pan-Squamous	C5	C27: PAN-SCC (HPV)		0
TCGA-4J-AA1J	CESC-C3	C10:M	C10	C27: PAN-SCC (HPV)		0
TCGA-FU-A770	CESC-C3	C10:M	C10	C27: PAN-SCC (HPV)		0
TCGA-2W-A8YY	CESC-C1	C2:Pan-GI	C4	C8: UCEC		0
TCGA-VS-A8QM	CESC-C3	C1:Pan-Squamous	C5	C20: Mixed (Stromal/Immune)		0
TCGA-EX-A69M	CESC-C3	C9:THYM/TGCT	C10	C27: PAN-SCC (HPV)		0
TCGA-C5-A1MK	CESC-C1	C5:BRCA	C5	C27: PAN-SCC (HPV)		0
TCGA-VS-A9UT	CESC-C1	C11:Pan-Gyn	C7	C22: TGCT		0
TCGA-ZJ-AAXN	CESC-C2	C1:Pan-Squamous	C10	C27: PAN-SCC (HPV)		0
TCGA-EA-A3HU	CESC-C3	C10:M	C10
TCGA-IR-A3LA	CESC-C1	C2:Pan-GI	C4	C25: Pan-SCC (Chr 11 amp)		0
TCGA-C5-A8YQ	CESC-C1	C7:PCPG/GBM(IDH1wt)	C10	C10: Pan-SCC		1
TCGA-RA-A741	CESC-C3	C1:Pan-Squamous	C10	C27: PAN-SCC (HPV)		0
TCGA-MY-A5BF	CESC-C3	C1:Pan-Squamous	C10	C27: PAN-SCC (HPV)		0
TCGA-VS-A8QA	CESC-C3	C9:THYM/TGCT	C10	C18: Pan-GI (MSI)		0
TCGA-XS-A8TJ	CESC-C3	C10:M	C10	C27: PAN-SCC (HPV)		1
TCGA-C5-A8XJ	CESC-C1	C1:Pan-Squamous	C5	C27: PAN-SCC (HPV)		0
TCGA-EK-A2RL	CESC-C1	C3:LUADwithLUSC/THCA	C10	C18: Pan-GI (MSI)		0
TCGA-FU-A3NI	CESC-C1	C1:Pan-Squamous	C10	C27: PAN-SCC (HPV)		1
TCGA-ZX-AA5X	CESC-C1	C1:Pan-Squamous	C5	C27: PAN-SCC (HPV)		0
TCGA-LP-A4AW	CESC-C1	C1:Pan-Squamous	C5	C10: Pan-SCC		0
TCGA-LP-A7HU	CESC-C1	C4:Pan-GynwithSARC	C10	C18: Pan-GI (MSI)		1
TCGA-C5-A1M7	CESC-C3	C1:Pan-Squamous	C10	C27: PAN-SCC (HPV)		0
TCGA-JW-A5VL	CESC-C1	C1:Pan-Squamous	C10	C27: PAN-SCC (HPV)		0
TCGA-VS-A8QC	CESC-C1	C1:Pan-Squamous	C10	C27: PAN-SCC (HPV)		1
TCGA-FU-A3EO	CESC-C1	C2:Pan-GI	C10	C18: Pan-GI (MSI)		0
TCGA-ZJ-AAXI	CESC-C3	C1:Pan-Squamous	C10	C27: PAN-SCC (HPV)		0
TCGA-IR-A3LB	CESC-C1	C1:Pan-Squamous	C12	C18: Pan-GI (MSI)		0
TCGA-Q1-A6DT	CESC-C2	C1:Pan-Squamous	C10	C27: PAN-SCC (HPV)		1
TCGA-EX-A3L1	CESC-C2	C1:Pan-Squamous	C5	C27: PAN-SCC (HPV)		1
TCGA-EK-A2RA	CESC-C2	C1:Pan-Squamous	C10	C27: PAN-SCC (HPV)		1
TCGA-EA-A3QD	CESC-C1	C4:Pan-GynwithSARC	C10	C27: PAN-SCC (HPV)		0
TCGA-EK-A2RB	CESC-C1	C4:Pan-GynwithSARC	C10	C27: PAN-SCC (HPV)		0
TCGA-ZJ-AAXD	CESC-C2	C1:Pan-Squamous	C5	C27: PAN-SCC (HPV)		1
TCGA-C5-A1M8	CESC-C1	C4:Pan-GynwithSARC	C10	C27: PAN-SCC (HPV)		0
TCGA-EK-A2IR	CESC-C2	C1:Pan-Squamous	C10
TCGA-EA-A5ZF	CESC-C1	C5:BRCA	C5	C10: Pan-SCC		1
TCGA-ZJ-AAXU	CESC-C3	C1:Pan-Squamous	C10	C27: PAN-SCC (HPV)		0
TCGA-DG-A2KH	CESC-C3	C10:M	C3	C8: UCEC		1
TCGA-EA-A3HR	CESC-C2	C1:Pan-Squamous	C10	C10: Pan-SCC		0
TCGA-VS-A9U5	CESC-C3	C10:M	C10	C18: Pan-GI (MSI)		1
TCGA-HM-A6W2	CESC-C1	C11:Pan-Gyn	C4	C8: UCEC		0
TCGA-MU-A5YI	CESC-C3	C1:Pan-Squamous	C5	C10: Pan-SCC		0
TCGA-BI-A0VS	CESC-C1	C1:Pan-Squamous	C5	C10: Pan-SCC		1
TCGA-EK-A2PI	CESC-C2	C1:Pan-Squamous	C10	C25: Pan-SCC (Chr 11 amp)		0
TCGA-EK-A2RO	CESC-C1	C1:Pan-Squamous	C5	C27: PAN-SCC (HPV)		0
TCGA-EA-A44S	CESC-C3	C1:Pan-Squamous	C10	C27: PAN-SCC (HPV)		0
TCGA-MA-AA3Y	CESC-C2	C1:Pan-Squamous	C10	C27: PAN-SCC (HPV)		0
TCGA-C5-A907	CESC-C2	C1:Pan-Squamous	C10	C27: PAN-SCC (HPV)		0
TCGA-Q1-A5R1	CESC-C3	C10:M	C4	C18: Pan-GI (MSI)		0
TCGA-IR-A3LI	CESC-C3	C10:M	C10	C18: Pan-GI (MSI)		0
TCGA-EA-A3HT	CESC-C1	C5:BRCA	C5	C27: PAN-SCC (HPV)		0
TCGA-EX-A69L	CESC-C1	C1:Pan-Squamous	C10	C27: PAN-SCC (HPV)		0
TCGA-C5-A901	CESC-C3	C1:Pan-Squamous	C10
TCGA-Q1-A6DW	CESC-C1	C1:Pan-Squamous	C10	C27: PAN-SCC (HPV)		0
TCGA-FU-A3TX	CESC-C3	C10:M	C10	C27: PAN-SCC (HPV)		0
TCGA-Q1-A73P	CESC-C3	C10:M	C3	C18: Pan-GI (MSI)		0
TCGA-JW-AAVH	CESC-C3	C1:Pan-Squamous	C10	C27: PAN-SCC (HPV)		0
TCGA-VS-A9UY	CESC-C2	C1:Pan-Squamous	C10	C27: PAN-SCC (HPV)		0
TCGA-C5-A2LZ	CESC-C3	C9:THYM/TGCT	C10	C27: PAN-SCC (HPV)		0
TCGA-ZJ-AB0H	CESC-C1	C5:BRCA	C10	C27: PAN-SCC (HPV)		1
TCGA-EK-A2IP	CESC-C2	C1:Pan-Squamous	C10	C27: PAN-SCC (HPV)		0
TCGA-EA-A411	CESC-C1	C5:BRCA	C5	C10: Pan-SCC		1
TCGA-IR-A3LL	CESC-C2	C1:Pan-Squamous	C10	C27: PAN-SCC (HPV)		1
TCGA-VS-A959	CESC-C1	C4:Pan-GynwithSARC	C10	C27: PAN-SCC (HPV)		1
TCGA-ZJ-AAX4	CESC-C1	C4:Pan-GynwithSARC	C10	C27: PAN-SCC (HPV)		1
TCGA-LP-A5U3	CESC-C3	C1:Pan-Squamous	C10	C27: PAN-SCC (HPV)		0
TCGA-VS-A8EI	CESC-C2	C1:Pan-Squamous	C10	C27: PAN-SCC (HPV)		0
TCGA-UC-A7PI	CESC-C3	C10:M	C3	C27: PAN-SCC (HPV)		0
TCGA-VS-A8Q9	CESC-C2	C1:Pan-Squamous	C10	C25: Pan-SCC (Chr 11 amp)		0
TCGA-EK-A3GN	CESC-C2	C1:Pan-Squamous	C10	C27: PAN-SCC (HPV)		0
TCGA-EX-A449	CESC-C3
TCGA-EA-A6QX	CESC-C1	C4:Pan-GynwithSARC	C10	C27: PAN-SCC (HPV)		0
TCGA-HG-A2PA	CESC-C3	C1:Pan-Squamous	C5	C27: PAN-SCC (HPV)		0
TCGA-DR-A0ZM	CESC-C3	C1:Pan-Squamous	C10	C27: PAN-SCC (HPV)		0
TCGA-EK-A2PL	CESC-C2	C1:Pan-Squamous	C10	C27: PAN-SCC (HPV)		0
TCGA-C5-A1MF	CESC-C2	C9:THYM/TGCT	C10	C27: PAN-SCC (HPV)		0
TCGA-MU-A51Y	CESC-C1	C4:Pan-GynwithSARC	C5	C27: PAN-SCC (HPV)		0
TCGA-C5-A7UE	CESC-C3	C1:Pan-Squamous	C10	C27: PAN-SCC (HPV)		0
TCGA-VS-A9UB	CESC-C2	C1:Pan-Squamous	C10	C27: PAN-SCC (HPV)		0
TCGA-EA-A78R	CESC-C1	C1:Pan-Squamous	C10	C27: PAN-SCC (HPV)		0
TCGA-DS-A1OC	CESC-C3	C10:M	C10
TCGA-DS-A5RQ	CESC-C3	C1:Pan-Squamous	C10	C27: PAN-SCC (HPV)		0
TCGA-C5-A7CK	CESC-C1	C1:Pan-Squamous	C5	C27: PAN-SCC (HPV)		0
TCGA-DS-A1OB	CESC-C1	C1:Pan-Squamous	C10
TCGA-C5-A1BM	CESC-C3	C1:Pan-Squamous	C10	C27: PAN-SCC (HPV)		0
TCGA-FU-A3WB	CESC-C3	C1:Pan-Squamous	C10	C27: PAN-SCC (HPV)		0
TCGA-ZJ-A8QR	CESC-C2	C1:Pan-Squamous	C10	C27: PAN-SCC (HPV)		0
TCGA-IR-A3LF	CESC-C3	C10:M	C12	C18: Pan-GI (MSI)		0
TCGA-UC-A7PD	CESC-C2	C1:Pan-Squamous	C10	C27: PAN-SCC (HPV)		0
TCGA-JW-A5VJ	CESC-C1	C4:Pan-GynwithSARC	C10	C27: PAN-SCC (HPV)		0
TCGA-C5-A1MP	CESC-C1	C4:Pan-GynwithSARC	C5	C27: PAN-SCC (HPV)		0
TCGA-DG-A2KK	CESC-C3	C10:M	C10	C18: Pan-GI (MSI)		0
TCGA-EA-A5O9	CESC-C2	C1:Pan-Squamous	C10	C27: PAN-SCC (HPV)		1
TCGA-EK-A3GJ	CESC-C2	C1:Pan-Squamous	C10	C27: PAN-SCC (HPV)		0
TCGA-C5-A3HF	CESC-C3	C10:M	C12	C20: Mixed (Stromal/Immune)		0
TCGA-EA-A3HQ	CESC-C1	C5:BRCA	C10	C27: PAN-SCC (HPV)		0
TCGA-C5-A7CO	CESC-C3	C1:Pan-Squamous	C10	C27: PAN-SCC (HPV)		1
TCGA-EK-A2RM	CESC-C1	C2:Pan-GI	C10	C2: BRCA (HER2 amp)		1
TCGA-UC-A7PG	CESC-C1	C1:Pan-Squamous	C10	C27: PAN-SCC (HPV)		1
TCGA-FU-A2QG	CESC-C2	C1:Pan-Squamous	C10	C27: PAN-SCC (HPV)		0
TCGA-C5-A1M5	CESC-C3	C1:Pan-Squamous	C10	C27: PAN-SCC (HPV)		0
TCGA-EK-A2R8	CESC-C2	C1:Pan-Squamous	C10	C27: PAN-SCC (HPV)		0
TCGA-VS-A8Q8	CESC-C3	C1:Pan-Squamous	C10	C27: PAN-SCC (HPV)		0
TCGA-VS-A9V2	CESC-C3	C10:M	C10	C27: PAN-SCC (HPV)		0
TCGA-EK-A2PK	CESC-C1	C3:LUADwithLUSC/THCA	C10	C27: PAN-SCC (HPV)		1
TCGA-C5-A2LV	CESC-C2	C1:Pan-Squamous	C10	C27: PAN-SCC (HPV)		1
TCGA-EA-A5FO	CESC-C3	C1:Pan-Squamous	C10	C18: Pan-GI (MSI)		0
TCGA-VS-A954	CESC-C1	C4:Pan-GynwithSARC	C10	C27: PAN-SCC (HPV)		0
TCGA-C5-A2LY	CESC-C3	C1:Pan-Squamous	C10	C27: PAN-SCC (HPV)		0

## Sheet: COAD
	colCluster	PanCan colCluster	PanCan mCluster	Hoadley iCluster	TCGA Subtype	High Aneuploidy
TCGA-QG-A5YV	COAD-C4	C2:Pan-GI	C3	C4: Pan-GI (CRC)	GI.CIN	1
TCGA-4T-AA8H	COAD-C4	C10:M	C3	C4: Pan-GI (CRC)	GI.CIN	1
TCGA-F4-6856	COAD-C1	C2:Pan-GI	C3	C4: Pan-GI (CRC)	GI.HM-indel	0
TCGA-AA-3712	COAD-C2	C2:Pan-GI	C3	C4: Pan-GI (CRC)	GI.CIN	1
TCGA-CM-6170	COAD-C2	C2:Pan-GI	C3	C4: Pan-GI (CRC)	GI.CIN	0
TCGA-F4-6704	COAD-C1	C2:Pan-GI	C12	C20: Mixed (Stromal/Immune)	GI.CIN	1
TCGA-A6-6141	COAD-C1	C2:Pan-GI	C3	C4: Pan-GI (CRC)		0
TCGA-AZ-6605	COAD-C2	C2:Pan-GI	C12	C4: Pan-GI (CRC)	GI.CIN	1
TCGA-AD-5900	COAD-C1	C2:Pan-GI	C3	C18: Pan-GI (MSI)	GI.HM-indel	0
TCGA-G4-6586	COAD-C4	C2:Pan-GI	C3	C18: Pan-GI (MSI)	GI.HM-indel	0
TCGA-A6-2685	COAD-C2	C2:Pan-GI	C12	C20: Mixed (Stromal/Immune)	GI.CIN	1
TCGA-CA-6719	COAD-C1	C2:Pan-GI	C3	C4: Pan-GI (CRC)	GI.CIN	1
TCGA-AD-6890	COAD-C2	C2:Pan-GI	C3	C4: Pan-GI (CRC)	GI.CIN	0
TCGA-CM-5860	COAD-C2	C2:Pan-GI	C3	C4: Pan-GI (CRC)	GI.CIN	1
TCGA-CM-6675	COAD-C2	C2:Pan-GI	C3	C18: Pan-GI (MSI)	GI.CIN	0
TCGA-AA-3506	COAD-C2	C2:Pan-GI	C3	C4: Pan-GI (CRC)	GI.GS	0
TCGA-D5-6898	COAD-C1	C2:Pan-GI	C3	C4: Pan-GI (CRC)	GI.CIN	1
TCGA-CA-5256	COAD-C3	C2:Pan-GI	C3	C4: Pan-GI (CRC)	GI.CIN	1
TCGA-F4-6808	COAD-C4	C2:Pan-GI	C3	C4: Pan-GI (CRC)	GI.CIN	1
TCGA-CA-5255	COAD-C4	C2:Pan-GI	C3	C4: Pan-GI (CRC)	GI.CIN	1
TCGA-AD-6964	COAD-C1	C5:BRCA	C12	C20: Mixed (Stromal/Immune)	GI.HM-indel	0
TCGA-DM-A285	COAD-C2	C2:Pan-GI	C3	C4: Pan-GI (CRC)	GI.CIN	1
TCGA-G4-6626	COAD-C2	C2:Pan-GI	C3	C4: Pan-GI (CRC)	GI.CIN	1
TCGA-D5-6538	COAD-C4	C2:Pan-GI	C3	C18: Pan-GI (MSI)	GI.CIN	1
TCGA-DM-A1D0	COAD-C4	C2:Pan-GI	C3	C2: BRCA (HER2 amp)	GI.CIN	0
TCGA-G4-6322	COAD-C4	C10:M	C3	C18: Pan-GI (MSI)	GI.CIN	0
TCGA-D5-6922	COAD-C2	C2:Pan-GI	C3	C4: Pan-GI (CRC)	GI.CIN	1
TCGA-A6-5664	COAD-C3	C11:Pan-Gyn	C12	C20: Mixed (Stromal/Immune)	GI.GS	0
TCGA-CA-6716	COAD-C3	C2:Pan-GI	C3	C4: Pan-GI (CRC)	GI.CIN	1
TCGA-NH-A50T	COAD-C2	C2:Pan-GI	C3	C4: Pan-GI (CRC)	GI.CIN	1
TCGA-4N-A93T	COAD-C4	C2:Pan-GI	C3	C4: Pan-GI (CRC)	GI.CIN	0
TCGA-CM-6166	COAD-C3	C2:Pan-GI	C3	C4: Pan-GI (CRC)	GI.CIN	1
TCGA-CM-6167	COAD-C1	C2:Pan-GI	C12	C20: Mixed (Stromal/Immune)	GI.CIN	1
TCGA-AD-6888	COAD-C4	C2:Pan-GI	C3	C2: BRCA (HER2 amp)	GI.CIN	1
TCGA-D5-6536	COAD-C1	C2:Pan-GI	C3	C4: Pan-GI (CRC)	GI.CIN	0
TCGA-D5-5540	COAD-C3	C2:Pan-GI	C3	C4: Pan-GI (CRC)	GI.CIN	0
TCGA-DM-A28G	COAD-C3	C2:Pan-GI	C3	C4: Pan-GI (CRC)	GI.GS	0
TCGA-QL-A97D	COAD-C4	C10:M	C3	C4: Pan-GI (CRC)	GI.CIN	1
TCGA-A6-6781	COAD-C1	C3:LUADwithLUSC/THCA	C12			0
TCGA-A6-5661	COAD-C2	C2:Pan-GI	C3	C18: Pan-GI (MSI)	GI.HM-indel	0
TCGA-AZ-6600	COAD-C2	C2:Pan-GI	C3	C4: Pan-GI (CRC)	GI.CIN	1
TCGA-G4-6295	COAD-C3	C2:Pan-GI	C3	C4: Pan-GI (CRC)	GI.CIN	1
TCGA-DM-A1D6	COAD-C4	C2:Pan-GI	C3	C4: Pan-GI (CRC)	GI.CIN	0
TCGA-CM-4747	COAD-C2	C2:Pan-GI	C3	C4: Pan-GI (CRC)	GI.CIN	1
TCGA-F4-6703	COAD-C1	C5:BRCA	C12	C20: Mixed (Stromal/Immune)	GI.HM-indel	0
TCGA-CM-6165	COAD-C2	C2:Pan-GI	C3	C4: Pan-GI (CRC)	GI.CIN	0
TCGA-DM-A288	COAD-C2	C2:Pan-GI	C3	C4: Pan-GI (CRC)	GI.CIN	1
TCGA-D5-6931	COAD-C2	C2:Pan-GI	C3	C18: Pan-GI (MSI)	GI.CIN	0
TCGA-AA-A02K	COAD-C2	C2:Pan-GI	C3
TCGA-D5-6923	COAD-C2	C2:Pan-GI	C3	C4: Pan-GI (CRC)		0
TCGA-AD-6901	COAD-C1	C2:Pan-GI	C12	C4: Pan-GI (CRC)	GI.CIN	1
TCGA-DM-A28K	COAD-C4	C10:M	C3	C4: Pan-GI (CRC)	GI.CIN	0
TCGA-A6-6780	COAD-C1	C2:Pan-GI	C3			0
TCGA-D5-6928	COAD-C1	C2:Pan-GI	C12	C20: Mixed (Stromal/Immune)	GI.HM-indel	0
TCGA-AD-6548	COAD-C1	C2:Pan-GI	C3	C4: Pan-GI (CRC)	GI.GS	0
TCGA-A6-A567	COAD-C2	C2:Pan-GI	C3	C4: Pan-GI (CRC)	GI.CIN	0
TCGA-A6-5660	COAD-C3	C2:Pan-GI	C3	C4: Pan-GI (CRC)	GI.CIN	1
TCGA-CM-6164	COAD-C3	C2:Pan-GI	C3	C4: Pan-GI (CRC)	GI.CIN	1
TCGA-AZ-6599	COAD-C4	C10:M	C3	C4: Pan-GI (CRC)	GI.GS	0
TCGA-A6-6142	COAD-C1	C2:Pan-GI	C12	C4: Pan-GI (CRC)	GI.CIN	1
TCGA-CK-6751	COAD-C2	C2:Pan-GI	C3	C18: Pan-GI (MSI)	GI.GS	0
TCGA-AY-6197	COAD-C4	C10:M	C3	C18: Pan-GI (MSI)	GI.HM-indel	0
TCGA-G4-6628	COAD-C1	C2:Pan-GI	C3	C18: Pan-GI (MSI)	GI.HM-indel	0
TCGA-CM-5861	COAD-C1	C2:Pan-GI	C3	C18: Pan-GI (MSI)	GI.HM-indel	0
TCGA-AZ-6607	COAD-C1	C2:Pan-GI	C12	C14: LUAD		1
TCGA-AD-6889	COAD-C2	C2:Pan-GI	C3	C18: Pan-GI (MSI)	GI.HM-indel	0
TCGA-F4-6809	COAD-C1	C2:Pan-GI	C12	C20: Mixed (Stromal/Immune)	GI.CIN	0
TCGA-AY-6196	COAD-C1	C3:LUADwithLUSC/THCA	C12	C20: Mixed (Stromal/Immune)	GI.CIN	1
TCGA-AZ-5403	COAD-C2	C2:Pan-GI	C3	C4: Pan-GI (CRC)	GI.CIN	1
TCGA-G4-6321	COAD-C4	C10:M	C3	C18: Pan-GI (MSI)	GI.GS	0
TCGA-AY-5543	COAD-C4	C2:Pan-GI	C3	C4: Pan-GI (CRC)	GI.CIN	0
TCGA-G4-6302	COAD-C1	C5:BRCA	C12	C20: Mixed (Stromal/Immune)	GI.HM-indel	0
TCGA-DM-A0X9	COAD-C2	C2:Pan-GI	C3	C18: Pan-GI (MSI)	GI.GS	0
TCGA-CA-6715	COAD-C3	C2:Pan-GI	C3	C4: Pan-GI (CRC)	GI.CIN	0
TCGA-NH-A5IV	COAD-C1	C2:Pan-GI	C3	C4: Pan-GI (CRC)	GI.HM-indel	0
TCGA-D5-6540	COAD-C1	C2:Pan-GI	C3	C18: Pan-GI (MSI)	GI.HM-indel	0
TCGA-G4-6306	COAD-C4	C9:THYM/TGCT	C3	C4: Pan-GI (CRC)	GI.CIN	1
TCGA-AA-A01Z	COAD-C2	C2:Pan-GI	C3	C4: Pan-GI (CRC)	GI.CIN	0
TCGA-SS-A7HO	COAD-C3	C11:Pan-Gyn	C3	C4: Pan-GI (CRC)	GI.CIN	1
TCGA-5M-AAT6	COAD-C1	C2:Pan-GI	C12	C20: Mixed (Stromal/Immune)	GI.HM-indel	0
TCGA-CK-5914	COAD-C1	C2:Pan-GI	C3	C4: Pan-GI (CRC)	GI.CIN	1
TCGA-A6-6654	COAD-C1	C2:Pan-GI	C12	C20: Mixed (Stromal/Immune)	GI.CIN	1
TCGA-DM-A1HA	COAD-C4	C9:THYM/TGCT	C3	C4: Pan-GI (CRC)	GI.GS	0
TCGA-G4-6323	COAD-C4	C10:M	C3	C4: Pan-GI (CRC)	GI.GS	0
TCGA-DM-A1DB	COAD-C3	C2:Pan-GI	C3	C4: Pan-GI (CRC)	GI.CIN	1
TCGA-G4-6298	COAD-C3	C2:Pan-GI	C3	C4: Pan-GI (CRC)	GI.CIN	1
TCGA-AU-6004	COAD-C1	C2:Pan-GI	C3	C18: Pan-GI (MSI)	GI.HM-indel	0
TCGA-G4-6299	COAD-C1	C2:Pan-GI	C3	C18: Pan-GI (MSI)	GI.CIN	1
TCGA-A6-2675	COAD-C1	C2:Pan-GI	C12	C4: Pan-GI (CRC)	GI.CIN	1
TCGA-CM-6680	COAD-C2	C2:Pan-GI	C3	C4: Pan-GI (CRC)	GI.CIN	0
TCGA-G4-6311	COAD-C1	C2:Pan-GI	C3	C4: Pan-GI (CRC)	GI.CIN	1
TCGA-AA-3675	COAD-C2	C2:Pan-GI	C3			0
TCGA-AA-3496	COAD-C1	C2:Pan-GI	C3	C4: Pan-GI (CRC)	GI.CIN	1
TCGA-D5-6530	COAD-C1	C2:Pan-GI	C3	C4: Pan-GI (CRC)	GI.HM-indel	0
TCGA-AA-A01P	COAD-C1	C2:Pan-GI	C12	C18: Pan-GI (MSI)	GI.HM-indel	0
TCGA-CK-6746	COAD-C1	C2:Pan-GI	C3	C18: Pan-GI (MSI)	GI.HM-indel	0
TCGA-AA-A02Y	COAD-C4	C10:M	C3	C4: Pan-GI (CRC)	GI.GS	0
TCGA-AZ-6603	COAD-C2	C2:Pan-GI	C3	C4: Pan-GI (CRC)	GI.CIN	1
TCGA-A6-6653	COAD-C1	C2:Pan-GI	C3	C18: Pan-GI (MSI)	GI.HM-indel	0
TCGA-DM-A1D9	COAD-C2	C2:Pan-GI	C3	C4: Pan-GI (CRC)	GI.CIN	0
TCGA-G4-6588	COAD-C1	C2:Pan-GI	C3	C18: Pan-GI (MSI)	GI.HM-indel	0
TCGA-DM-A282	COAD-C3	C2:Pan-GI	C3	C4: Pan-GI (CRC)	GI.CIN	0
TCGA-D5-6920	COAD-C4	C2:Pan-GI	C3	C4: Pan-GI (CRC)	GI.GS	0
TCGA-CK-5913	COAD-C1	C2:Pan-GI	C3	C18: Pan-GI (MSI)	GI.HM-indel	0
TCGA-WS-AB45	COAD-C1	C4:Pan-GynwithSARC	C12	C18: Pan-GI (MSI)	GI.HM-indel	0
TCGA-AA-3489	COAD-C1	C3:LUADwithLUSC/THCA	C12	C20: Mixed (Stromal/Immune)	GI.CIN	0
TCGA-AM-5820	COAD-C2	C2:Pan-GI	C3	C4: Pan-GI (CRC)	GI.CIN	0
TCGA-G4-6293	COAD-C4	C2:Pan-GI	C3	C4: Pan-GI (CRC)	GI.GS	0
TCGA-A6-2682	COAD-C2	C2:Pan-GI	C3	C4: Pan-GI (CRC)
TCGA-D5-6541	COAD-C1	C2:Pan-GI	C3	C4: Pan-GI (CRC)	GI.CIN	0
TCGA-D5-5537	COAD-C2	C2:Pan-GI	C3	C4: Pan-GI (CRC)	GI.CIN	1
TCGA-CM-5864	COAD-C4	C2:Pan-GI	C3	C4: Pan-GI (CRC)	GI.CIN	1
TCGA-A6-A5ZU	COAD-C1	C2:Pan-GI	C3	C4: Pan-GI (CRC)
TCGA-F4-6460	COAD-C3	C2:Pan-GI	C3	C4: Pan-GI (CRC)	GI.CIN	1
TCGA-AY-A54L	COAD-C4	C2:Pan-GI	C3	C4: Pan-GI (CRC)	GI.CIN	1
TCGA-A6-A566	COAD-C1	C2:Pan-GI	C12	C18: Pan-GI (MSI)	GI.GS	0
TCGA-CM-6161	COAD-C2	C2:Pan-GI	C3	C4: Pan-GI (CRC)	GI.GS	1
TCGA-DM-A1D7	COAD-C4	C2:Pan-GI	C3	C4: Pan-GI (CRC)	GI.GS	0
TCGA-AA-3526	COAD-C1	C2:Pan-GI	C3	C4: Pan-GI (CRC)		0
TCGA-CA-6718	COAD-C1	C4:Pan-GynwithSARC	C3	C18: Pan-GI (MSI)	GI.HM-SNV	0
TCGA-CM-4743	COAD-C1	C2:Pan-GI	C3	C18: Pan-GI (MSI)	GI.HM-indel	0
TCGA-AD-6899	COAD-C2	C2:Pan-GI	C12	C4: Pan-GI (CRC)	GI.CIN	1
TCGA-AA-3685	COAD-C2	C2:Pan-GI	C3	C4: Pan-GI (CRC)	GI.CIN	1
TCGA-D5-6537	COAD-C3	C2:Pan-GI	C3	C4: Pan-GI (CRC)	GI.GS	1
TCGA-DM-A28E	COAD-C4	C2:Pan-GI	C3	C4: Pan-GI (CRC)	GI.CIN	0
TCGA-NH-A6GB	COAD-C4	C2:Pan-GI	C3	C4: Pan-GI (CRC)	GI.CIN	0
TCGA-A6-6650	COAD-C4	C2:Pan-GI	C3			1
TCGA-AZ-4315	COAD-C2	C2:Pan-GI	C3	C4: Pan-GI (CRC)	GI.HM-SNV	0
TCGA-CM-6171	COAD-C4	C10:M	C3	C18: Pan-GI (MSI)	GI.HM-indel	0
TCGA-D5-6932	COAD-C2	C2:Pan-GI	C3	C4: Pan-GI (CRC)	GI.CIN	1
TCGA-CM-5862	COAD-C2	C2:Pan-GI	C3	C4: Pan-GI (CRC)	GI.CIN	1
TCGA-F4-6463	COAD-C3	C2:Pan-GI	C12	C4: Pan-GI (CRC)	GI.GS	0
TCGA-A6-6140	COAD-C4	C10:M	C3	C4: Pan-GI (CRC)		1
TCGA-CK-5912	COAD-C4	C2:Pan-GI	C3	C4: Pan-GI (CRC)	GI.CIN	1
TCGA-DM-A0XD	COAD-C1	C2:Pan-GI	C3	C18: Pan-GI (MSI)	GI.CIN	0
TCGA-AZ-4616	COAD-C2	C2:Pan-GI	C3	C4: Pan-GI (CRC)	GI.CIN	1
TCGA-CM-4744	COAD-C4	C2:Pan-GI	C3	C18: Pan-GI (MSI)	GI.CIN	0
TCGA-AD-6963	COAD-C4	C2:Pan-GI	C3	C4: Pan-GI (CRC)	GI.CIN	1
TCGA-CM-5868	COAD-C1	C2:Pan-GI	C3	C4: Pan-GI (CRC)	GI.CIN	0
TCGA-AY-6386	COAD-C2	C2:Pan-GI	C3	C4: Pan-GI (CRC)	GI.GS	0
TCGA-D5-6533	COAD-C3	C2:Pan-GI	C3	C4: Pan-GI (CRC)	GI.CIN	1
TCGA-A6-6652	COAD-C3	C2:Pan-GI	C3	C4: Pan-GI (CRC)	GI.CIN	1
TCGA-A6-A565	COAD-C4	C2:Pan-GI	C3	C20: Mixed (Stromal/Immune)	GI.HM-indel	0
TCGA-CM-5344	COAD-C1	C2:Pan-GI	C3	C4: Pan-GI (CRC)	GI.CIN	1
TCGA-D5-6534	COAD-C1	C2:Pan-GI	C12	C20: Mixed (Stromal/Immune)	GI.CIN	1
TCGA-F4-6807	COAD-C1	C2:Pan-GI	C12	C20: Mixed (Stromal/Immune)	GI.CIN	0
TCGA-D5-6531	COAD-C1	C2:Pan-GI	C3	C18: Pan-GI (MSI)	GI.CIN	1
TCGA-QG-A5Z1	COAD-C2	C2:Pan-GI	C3	C4: Pan-GI (CRC)	GI.CIN	0
TCGA-5M-AATE	COAD-C4	C2:Pan-GI	C3	C4: Pan-GI (CRC)	GI.CIN	1
TCGA-A6-A56B	COAD-C2	C2:Pan-GI	C3	C4: Pan-GI (CRC)	GI.CIN	0
TCGA-DM-A28M	COAD-C4	C2:Pan-GI	C3	C4: Pan-GI (CRC)	GI.CIN	1
TCGA-QG-A5Z2	COAD-C4	C10:M	C3	C18: Pan-GI (MSI)	GI.HM-indel	0
TCGA-A6-6649	COAD-C4	C2:Pan-GI	C12	C18: Pan-GI (MSI)	GI.CIN	1
TCGA-G4-6315	COAD-C4	C10:M	C3	C4: Pan-GI (CRC)	GI.CIN	1
TCGA-AZ-6606	COAD-C4	C10:M	C3	C18: Pan-GI (MSI)	GI.CIN	0
TCGA-AA-3492	COAD-C2	C2:Pan-GI	C3	C18: Pan-GI (MSI)	GI.HM-indel	0
TCGA-AD-A5EK	COAD-C2	C2:Pan-GI	C3	C4: Pan-GI (CRC)	GI.CIN	1
TCGA-G4-6627	COAD-C2	C2:Pan-GI	C12	C20: Mixed (Stromal/Immune)	GI.GS	0
TCGA-A6-5665	COAD-C4	C2:Pan-GI	C3	C18: Pan-GI (MSI)	GI.HM-indel	0
TCGA-CA-6717	COAD-C1	C2:Pan-GI	C12	C20: Mixed (Stromal/Immune)	GI.HM-SNV
TCGA-AA-3655	COAD-C2	C2:Pan-GI	C3	C4: Pan-GI (CRC)	GI.CIN	0
TCGA-F4-6806	COAD-C2	C2:Pan-GI	C3	C4: Pan-GI (CRC)	GI.GS	0
TCGA-NH-A6GA	COAD-C2	C2:Pan-GI	C3	C4: Pan-GI (CRC)	GI.CIN	1
TCGA-3L-AA1B	COAD-C4	C2:Pan-GI	C3	C4: Pan-GI (CRC)	GI.CIN	1
TCGA-CM-6676	COAD-C2	C2:Pan-GI	C3	C4: Pan-GI (CRC)	GI.CIN	1
TCGA-CA-5796	COAD-C4	C10:M	C3	C4: Pan-GI (CRC)	GI.GS	0
TCGA-AA-3511	COAD-C2	C2:Pan-GI	C3	C4: Pan-GI (CRC)	GI.CIN	1
TCGA-A6-5659	COAD-C3	C2:Pan-GI	C3			0
TCGA-AY-A69D	COAD-C2	C2:Pan-GI	C3	C4: Pan-GI (CRC)	GI.CIN	1
TCGA-AM-5821	COAD-C1	C2:Pan-GI	C3	C18: Pan-GI (MSI)	GI.HM-indel	0
TCGA-CK-4950	COAD-C2	C2:Pan-GI	C3	C18: Pan-GI (MSI)	GI.GS	0
TCGA-CM-6162	COAD-C1	C2:Pan-GI	C12	C20: Mixed (Stromal/Immune)	GI.HM-indel	0
TCGA-A6-5657	COAD-C2	C2:Pan-GI	C12	C20: Mixed (Stromal/Immune)	GI.CIN	0
TCGA-CK-6747	COAD-C2	C2:Pan-GI	C3	C4: Pan-GI (CRC)	GI.GS	0
TCGA-CK-6748	COAD-C2	C2:Pan-GI	C3	C4: Pan-GI (CRC)	GI.CIN	1
TCGA-D5-6529	COAD-C2	C2:Pan-GI	C3	C4: Pan-GI (CRC)	GI.CIN	1
TCGA-AZ-4323	COAD-C3	C2:Pan-GI	C12	C20: Mixed (Stromal/Immune)	GI.GS	0
TCGA-F4-6854	COAD-C3	C2:Pan-GI	C3	C4: Pan-GI (CRC)	GI.CIN	0
TCGA-D5-6924	COAD-C1	C2:Pan-GI	C12	C4: Pan-GI (CRC)	GI.CIN	1
TCGA-AA-3663	COAD-C4	C2:Pan-GI	C3	C18: Pan-GI (MSI)	GI.HM-indel	0
TCGA-AA-A01X	COAD-C4	C2:Pan-GI	C3	C4: Pan-GI (CRC)	GI.CIN	1
TCGA-AZ-4614	COAD-C4	C2:Pan-GI	C3	C18: Pan-GI (MSI)	GI.CIN	0
TCGA-A6-2684	COAD-C2	C2:Pan-GI	C3			0
TCGA-D5-6539	COAD-C4	C10:M	C3	C4: Pan-GI (CRC)	GI.CIN	1
TCGA-G4-6320	COAD-C4	C2:Pan-GI	C3	C18: Pan-GI (MSI)	GI.HM-indel	0
TCGA-A6-6782	COAD-C2	C2:Pan-GI	C12	C4: Pan-GI (CRC)	GI.CIN	0
TCGA-CM-5348	COAD-C1	C2:Pan-GI	C12	C4: Pan-GI (CRC)	GI.CIN	1
TCGA-G4-6317	COAD-C3	C2:Pan-GI	C3	C4: Pan-GI (CRC)	GI.CIN	1
TCGA-F4-6805	COAD-C2	C2:Pan-GI	C12	C20: Mixed (Stromal/Immune)	GI.CIN	0
TCGA-CM-6678	COAD-C2	C2:Pan-GI	C3	C4: Pan-GI (CRC)	GI.CIN	0
TCGA-NH-A8F7	COAD-C4	C2:Pan-GI	C3	C4: Pan-GI (CRC)	GI.CIN	1
TCGA-AA-3713	COAD-C2	C2:Pan-GI	C3	C18: Pan-GI (MSI)	GI.HM-indel	0
TCGA-RU-A8FL	COAD-C4	C10:M	C3	C4: Pan-GI (CRC)	GI.CIN	1
TCGA-NH-A50V	COAD-C2	C2:Pan-GI	C3	C4: Pan-GI (CRC)	GI.CIN	0
TCGA-NH-A8F8	COAD-C1	C2:Pan-GI	C3	C4: Pan-GI (CRC)	GI.CIN	1
TCGA-AD-A5EJ	COAD-C1	C2:Pan-GI	C3	C18: Pan-GI (MSI)	GI.HM-indel	0
TCGA-DM-A0XF	COAD-C2	C2:Pan-GI	C3	C4: Pan-GI (CRC)	GI.CIN	1
TCGA-G4-6297	COAD-C2	C2:Pan-GI	C12	C4: Pan-GI (CRC)	GI.CIN	1
TCGA-DM-A1D8	COAD-C4	C2:Pan-GI	C3	C4: Pan-GI (CRC)	GI.CIN	1
TCGA-CM-6679	COAD-C2	C2:Pan-GI	C3	C4: Pan-GI (CRC)	GI.CIN	1
TCGA-D5-6930	COAD-C1	C2:Pan-GI	C3	C18: Pan-GI (MSI)	GI.HM-indel	0
TCGA-AA-3502	COAD-C4	C10:M	C3	C4: Pan-GI (CRC)	GI.GS	0
TCGA-F4-6569	COAD-C1	C5:BRCA	C12	C20: Mixed (Stromal/Immune)	GI.CIN	0
TCGA-DM-A28H	COAD-C4	C2:Pan-GI	C3	C4: Pan-GI (CRC)	GI.CIN	0
TCGA-A6-6137	COAD-C4	C10:M	C3	C4: Pan-GI (CRC)	GI.CIN	0
TCGA-AA-3660	COAD-C2	C2:Pan-GI	C3	C4: Pan-GI (CRC)	GI.CIN	1
TCGA-AZ-5407	COAD-C4	C10:M	C3	C18: Pan-GI (MSI)	GI.GS	0
TCGA-D5-6926	COAD-C1	C2:Pan-GI	C3	C4: Pan-GI (CRC)	GI.CIN	1
TCGA-CM-6163	COAD-C2	C2:Pan-GI	C3	C4: Pan-GI (CRC)	GI.CIN	1
TCGA-D5-6535	COAD-C2	C2:Pan-GI	C3	C4: Pan-GI (CRC)	GI.CIN	1
TCGA-NH-A6GC	COAD-C2	C2:Pan-GI	C3	C4: Pan-GI (CRC)	GI.CIN	1
TCGA-G4-6303	COAD-C1	C2:Pan-GI	C3	C4: Pan-GI (CRC)	GI.CIN	1
TCGA-CK-5915	COAD-C4	C10:M	C3	C4: Pan-GI (CRC)	GI.CIN	1
TCGA-D5-7000	COAD-C2	C2:Pan-GI	C3	C18: Pan-GI (MSI)	GI.CIN	0
TCGA-AZ-4313	COAD-C2	C2:Pan-GI	C3	C4: Pan-GI (CRC)		0
TCGA-DM-A28A	COAD-C1	C2:Pan-GI	C3	C4: Pan-GI (CRC)	GI.CIN	0
TCGA-5M-AAT4	COAD-C2	C2:Pan-GI	C3	C4: Pan-GI (CRC)	GI.CIN	1
TCGA-AZ-4684	COAD-C2	C2:Pan-GI	C3	C4: Pan-GI (CRC)		1
TCGA-F4-6570	COAD-C1	C2:Pan-GI	C3	C18: Pan-GI (MSI)	GI.HM-indel	0
TCGA-A6-5662	COAD-C3	C2:Pan-GI	C3	C4: Pan-GI (CRC)	GI.CIN	0
TCGA-AA-3495	COAD-C2	C2:Pan-GI	C3	C4: Pan-GI (CRC)		0
TCGA-CK-4952	COAD-C4	C2:Pan-GI	C3	C18: Pan-GI (MSI)	GI.CIN	0
TCGA-CM-6172	COAD-C4	C2:Pan-GI	C3	C4: Pan-GI (CRC)	GI.CIN	0
TCGA-DM-A28C	COAD-C4	C2:Pan-GI	C3	C4: Pan-GI (CRC)	GI.GS	0
TCGA-A6-5656	COAD-C4	C2:Pan-GI	C3			0
TCGA-AZ-6598	COAD-C1	C2:Pan-GI	C3	C18: Pan-GI (MSI)	GI.HM-indel	0
TCGA-DM-A1DA	COAD-C1	C2:Pan-GI	C3	C18: Pan-GI (MSI)	GI.CIN	1
TCGA-DM-A1HB	COAD-C1	C2:Pan-GI	C3	C18: Pan-GI (MSI)	GI.HM-indel	0
TCGA-G4-6304	COAD-C4	C2:Pan-GI	C3	C4: Pan-GI (CRC)	GI.HM-indel	0
TCGA-A6-5666	COAD-C3	C2:Pan-GI	C3	C4: Pan-GI (CRC)	GI.CIN	0
TCGA-D5-5538	COAD-C2	C2:Pan-GI	C3	C4: Pan-GI (CRC)	GI.CIN	0
TCGA-CA-5797	COAD-C2	C2:Pan-GI	C3	C4: Pan-GI (CRC)	GI.CIN	1
TCGA-CM-5349	COAD-C2	C2:Pan-GI	C3	C4: Pan-GI (CRC)	GI.CIN	0
TCGA-CM-6677	COAD-C2	C2:Pan-GI	C3	C4: Pan-GI (CRC)	GI.CIN	1
TCGA-DM-A28F	COAD-C2	C2:Pan-GI	C3	C4: Pan-GI (CRC)	GI.CIN	1
TCGA-QG-A5YW	COAD-C2	C2:Pan-GI	C3	C4: Pan-GI (CRC)	GI.CIN	1
TCGA-G4-6309	COAD-C4	C2:Pan-GI	C3	C4: Pan-GI (CRC)	GI.HM-indel	0
TCGA-AY-A8YK	COAD-C4	C2:Pan-GI	C3	C4: Pan-GI (CRC)	GI.CIN	1
TCGA-AZ-4615	COAD-C1	C2:Pan-GI	C3	C18: Pan-GI (MSI)	GI.HM-indel	0
TCGA-DM-A280	COAD-C1	C2:Pan-GI	C3	C4: Pan-GI (CRC)	GI.GS	0
TCGA-F4-6855	COAD-C1	C2:Pan-GI	C12	C4: Pan-GI (CRC)	GI.GS	1
TCGA-A6-2686	COAD-C1	C2:Pan-GI	C3	C18: Pan-GI (MSI)	GI.HM-indel	1
TCGA-A6-4105	COAD-C3	C2:Pan-GI	C3	C18: Pan-GI (MSI)	GI.CIN	1
TCGA-CM-6169	COAD-C1	C2:Pan-GI	C12	C4: Pan-GI (CRC)	GI.CIN	0
TCGA-AA-3509	COAD-C2	C2:Pan-GI	C3
TCGA-A6-6648	COAD-C4	C10:M	C3	C4: Pan-GI (CRC)	GI.CIN	1
TCGA-CM-6674	COAD-C1	C2:Pan-GI	C3	C20: Mixed (Stromal/Immune)	GI.HM-indel	0
TCGA-AD-6965	COAD-C2	C2:Pan-GI	C3	C4: Pan-GI (CRC)	GI.CIN	1
TCGA-DM-A1D4	COAD-C4	C10:M	C3	C4: Pan-GI (CRC)	GI.CIN	0
TCGA-NH-A50U	COAD-C2	C2:Pan-GI	C3	C4: Pan-GI (CRC)	GI.CIN	1
TCGA-F4-6461	COAD-C2	C2:Pan-GI	C12	C18: Pan-GI (MSI)	GI.CIN	0
TCGA-CK-5916	COAD-C1	C2:Pan-GI	C3	C18: Pan-GI (MSI)	GI.HM-indel	0
TCGA-CA-5254	COAD-C1	C5:BRCA	C3	C18: Pan-GI (MSI)	GI.CIN	1
TCGA-CM-5863	COAD-C2	C2:Pan-GI	C12	C20: Mixed (Stromal/Immune)	GI.GS
TCGA-D5-6532	COAD-C2	C2:Pan-GI	C3	C4: Pan-GI (CRC)	GI.GS	0
TCGA-D5-5539	COAD-C2	C2:Pan-GI	C3	C4: Pan-GI (CRC)	GI.CIN	1
TCGA-AD-6895	COAD-C1	C2:Pan-GI	C3	C18: Pan-GI (MSI)	GI.HM-indel	0
TCGA-QG-A5YX	COAD-C4	C10:M	C3	C4: Pan-GI (CRC)	GI.CIN	0
TCGA-CM-6168	COAD-C1	C2:Pan-GI	C12	C20: Mixed (Stromal/Immune)	GI.GS	0
TCGA-A6-5667	COAD-C2	C2:Pan-GI	C3	C4: Pan-GI (CRC)	GI.CIN	1
TCGA-CK-4951	COAD-C1	C2:Pan-GI	C3	C18: Pan-GI (MSI)	GI.HM-indel	0
TCGA-G4-6307	COAD-C4	C2:Pan-GI	C3	C4: Pan-GI (CRC)	GI.CIN	1
TCGA-A6-6138	COAD-C1	C2:Pan-GI	C3	C4: Pan-GI (CRC)	GI.CIN	0
TCGA-CM-4751	COAD-C2	C2:Pan-GI	C3	C18: Pan-GI (MSI)	GI.CIN	0
TCGA-G4-6294	COAD-C4	C2:Pan-GI	C3	C4: Pan-GI (CRC)	GI.CIN	0
TCGA-D5-5541	COAD-C1	C2:Pan-GI	C3	C4: Pan-GI (CRC)	GI.CIN	1
TCGA-D5-6929	COAD-C1	C2:Pan-GI	C3	C4: Pan-GI (CRC)	GI.CIN	1
TCGA-A6-6651	COAD-C3	C2:Pan-GI	C12	C20: Mixed (Stromal/Immune)	GI.CIN	1
TCGA-F4-6459	COAD-C1	C2:Pan-GI	C12	C4: Pan-GI (CRC)	GI.CIN	1
TCGA-AY-A71X	COAD-C4	C9:THYM/TGCT	C3	C4: Pan-GI (CRC)	GI.GS	0
TCGA-T9-A92H	COAD-C2	C2:Pan-GI	C3	C4: Pan-GI (CRC)	GI.CIN	0

## Sheet: COADREAD
	colCluster	PanCan colCluster	PanCan mCluster	Hoadley iCluster	TCGA Subtype	High Aneuploidy
TCGA-4T-AA8H	COADREAD-C4	C10:M	C3	C4: Pan-GI (CRC)	GI.CIN	1
TCGA-A6-6141	COADREAD-C3	C2:Pan-GI	C3	C4: Pan-GI (CRC)		0
TCGA-AD-5900	COADREAD-C1	C2:Pan-GI	C3	C18: Pan-GI (MSI)	GI.HM-indel	0
TCGA-A6-2685	COADREAD-C2	C2:Pan-GI	C12	C20: Mixed (Stromal/Immune)	GI.CIN	1
TCGA-AG-3902	COADREAD-C4	C2:Pan-GI	C3	C4: Pan-GI (CRC)	GI.CIN	0
TCGA-D5-6898	COADREAD-C2	C2:Pan-GI	C3	C4: Pan-GI (CRC)	GI.CIN	1
TCGA-CA-5256	COADREAD-C3	C2:Pan-GI	C3	C4: Pan-GI (CRC)	GI.CIN	1
TCGA-AD-6964	COADREAD-C1	C5:BRCA	C12	C20: Mixed (Stromal/Immune)	GI.HM-indel	0
TCGA-CI-6620	COADREAD-C2	C2:Pan-GI	C3	C4: Pan-GI (CRC)	GI.CIN	0
TCGA-G4-6322	COADREAD-C4	C10:M	C3	C18: Pan-GI (MSI)	GI.CIN	0
TCGA-AH-6544	COADREAD-C4	C2:Pan-GI	C3	C4: Pan-GI (CRC)	GI.CIN	1
TCGA-D5-6536	COADREAD-C1	C2:Pan-GI	C3	C4: Pan-GI (CRC)	GI.CIN	0
TCGA-DM-A28G	COADREAD-C4	C2:Pan-GI	C3	C4: Pan-GI (CRC)	GI.GS	0
TCGA-AZ-6600	COADREAD-C2	C2:Pan-GI	C3	C4: Pan-GI (CRC)	GI.CIN	1
TCGA-A6-5661	COADREAD-C2	C2:Pan-GI	C3	C18: Pan-GI (MSI)	GI.HM-indel	0
TCGA-AG-3591	COADREAD-C4	C10:M	C3	C4: Pan-GI (CRC)	GI.CIN	1
TCGA-DM-A1D6	COADREAD-C2	C2:Pan-GI	C3	C4: Pan-GI (CRC)	GI.CIN	0
TCGA-F4-6703	COADREAD-C1	C5:BRCA	C12	C20: Mixed (Stromal/Immune)	GI.HM-indel	0
TCGA-D5-6931	COADREAD-C2	C2:Pan-GI	C3	C18: Pan-GI (MSI)	GI.CIN	0
TCGA-AA-A02K	COADREAD-C2	C2:Pan-GI	C3
TCGA-AH-6644	COADREAD-C2	C2:Pan-GI	C3	C4: Pan-GI (CRC)	GI.CIN	1
TCGA-AA-3662	COADREAD-C4
TCGA-AZ-6599	COADREAD-C4	C10:M	C3	C4: Pan-GI (CRC)	GI.GS	0
TCGA-EI-6513	COADREAD-C2	C2:Pan-GI	C3	C4: Pan-GI (CRC)	GI.CIN	0
TCGA-AY-6197	COADREAD-C4	C10:M	C3	C18: Pan-GI (MSI)	GI.HM-indel	0
TCGA-AA-3697	COADREAD-C4
TCGA-CM-5861	COADREAD-C1	C2:Pan-GI	C3	C18: Pan-GI (MSI)	GI.HM-indel	0
TCGA-DT-5265	COADREAD-C1	C2:Pan-GI	C12	C18: Pan-GI (MSI)	GI.CIN	0
TCGA-EI-6881	COADREAD-C4	C2:Pan-GI	C3	C4: Pan-GI (CRC)	GI.CIN	1
TCGA-DM-A0X9	COADREAD-C2	C2:Pan-GI	C3	C18: Pan-GI (MSI)	GI.GS	0
TCGA-G4-6306	COADREAD-C4	C9:THYM/TGCT	C3	C4: Pan-GI (CRC)	GI.CIN	1
TCGA-CK-5914	COADREAD-C3	C2:Pan-GI	C3	C4: Pan-GI (CRC)	GI.CIN	1
TCGA-DM-A1HA	COADREAD-C4	C9:THYM/TGCT	C3	C4: Pan-GI (CRC)	GI.GS	0
TCGA-G4-6323	COADREAD-C4	C10:M	C3	C4: Pan-GI (CRC)	GI.GS	0
TCGA-DM-A1DB	COADREAD-C3	C2:Pan-GI	C3	C4: Pan-GI (CRC)	GI.CIN	1
TCGA-G4-6311	COADREAD-C1	C2:Pan-GI	C3	C4: Pan-GI (CRC)	GI.CIN	1
TCGA-AA-3675	COADREAD-C2	C2:Pan-GI	C3			0
TCGA-CK-6746	COADREAD-C1	C2:Pan-GI	C3	C18: Pan-GI (MSI)	GI.HM-indel	0
TCGA-EI-6511	COADREAD-C1	C2:Pan-GI	C3	C4: Pan-GI (CRC)	GI.CIN	0
TCGA-AF-A56L	COADREAD-C2	C2:Pan-GI	C3	C2: BRCA (HER2 amp)	GI.CIN	1
TCGA-EI-6917	COADREAD-C1	C2:Pan-GI	C3	C18: Pan-GI (MSI)	GI.HM-SNV	0
TCGA-WS-AB45	COADREAD-C1	C4:Pan-GynwithSARC	C12	C18: Pan-GI (MSI)	GI.HM-indel	0
TCGA-AH-6547	COADREAD-C1	C2:Pan-GI	C3	C20: Mixed (Stromal/Immune)	GI.GS	0
TCGA-AM-5820	COADREAD-C2	C2:Pan-GI	C3	C4: Pan-GI (CRC)	GI.CIN	0
TCGA-F5-6814	COADREAD-C1	C2:Pan-GI	C3	C4: Pan-GI (CRC)	GI.HM-SNV	0
TCGA-A6-2682	COADREAD-C2	C2:Pan-GI	C3	C4: Pan-GI (CRC)
TCGA-AG-3725	COADREAD-C4	C2:Pan-GI	C3	C4: Pan-GI (CRC)	GI.CIN	1
TCGA-CM-5864	COADREAD-C4	C2:Pan-GI	C3	C4: Pan-GI (CRC)	GI.CIN	1
TCGA-AY-A54L	COADREAD-C4	C2:Pan-GI	C3	C4: Pan-GI (CRC)	GI.CIN	1
TCGA-AH-6903	COADREAD-C4	C2:Pan-GI	C3	C4: Pan-GI (CRC)	GI.GS	0
TCGA-CA-6718	COADREAD-C1	C4:Pan-GynwithSARC	C3	C18: Pan-GI (MSI)	GI.HM-SNV	0
TCGA-EI-6885	COADREAD-C3	C2:Pan-GI	C12	C4: Pan-GI (CRC)	GI.CIN	1
TCGA-D5-6537	COADREAD-C3	C2:Pan-GI	C3	C4: Pan-GI (CRC)	GI.GS	1
TCGA-A6-6650	COADREAD-C4	C2:Pan-GI	C3			1
TCGA-F4-6463	COADREAD-C3	C2:Pan-GI	C12	C4: Pan-GI (CRC)	GI.GS	0
TCGA-F5-6464	COADREAD-C2	C2:Pan-GI	C12	C4: Pan-GI (CRC)	GI.CIN	1
TCGA-CL-4957	COADREAD-C3	C2:Pan-GI	C3	C4: Pan-GI (CRC)	GI.CIN	0
TCGA-AZ-4616	COADREAD-C1	C2:Pan-GI	C3	C4: Pan-GI (CRC)	GI.CIN	1
TCGA-CM-5868	COADREAD-C2	C2:Pan-GI	C3	C4: Pan-GI (CRC)	GI.CIN	0
TCGA-AD-6963	COADREAD-C4	C2:Pan-GI	C3	C4: Pan-GI (CRC)	GI.CIN	1
TCGA-F5-6571	COADREAD-C2	C2:Pan-GI	C3	C4: Pan-GI (CRC)	GI.CIN	0
TCGA-A6-6652	COADREAD-C3	C2:Pan-GI	C3	C4: Pan-GI (CRC)	GI.CIN	1
TCGA-A6-A565	COADREAD-C1	C2:Pan-GI	C3	C20: Mixed (Stromal/Immune)	GI.HM-indel	0
TCGA-CM-5344	COADREAD-C2	C2:Pan-GI	C3	C4: Pan-GI (CRC)	GI.CIN	1
TCGA-F4-6807	COADREAD-C2	C2:Pan-GI	C12	C20: Mixed (Stromal/Immune)	GI.CIN	0
TCGA-AA-3511	COADREAD-C2	C2:Pan-GI	C3	C4: Pan-GI (CRC)	GI.CIN	1
TCGA-DY-A1DC	COADREAD-C2	C2:Pan-GI	C3	C4: Pan-GI (CRC)	GI.CIN	0
TCGA-CM-6162	COADREAD-C2	C2:Pan-GI	C12	C20: Mixed (Stromal/Immune)	GI.HM-indel	0
TCGA-G4-6627	COADREAD-C2	C2:Pan-GI	C12	C20: Mixed (Stromal/Immune)	GI.GS	0
TCGA-F4-6805	COADREAD-C2	C2:Pan-GI	C12	C20: Mixed (Stromal/Immune)	GI.CIN	0
TCGA-NH-A8F7	COADREAD-C4	C2:Pan-GI	C3	C4: Pan-GI (CRC)	GI.CIN	1
TCGA-DC-6156	COADREAD-C1	C2:Pan-GI	C12	C4: Pan-GI (CRC)		1
TCGA-CM-6679	COADREAD-C2	C2:Pan-GI	C3	C4: Pan-GI (CRC)	GI.CIN	1
TCGA-AA-3660	COADREAD-C2	C2:Pan-GI	C3	C4: Pan-GI (CRC)	GI.CIN	1
TCGA-AA-3502	COADREAD-C4	C10:M	C3	C4: Pan-GI (CRC)	GI.GS	0
TCGA-CM-6163	COADREAD-C2	C2:Pan-GI	C3	C4: Pan-GI (CRC)	GI.CIN	1
TCGA-AG-4021	COADREAD-C1	C2:Pan-GI	C3	C4: Pan-GI (CRC)	GI.CIN	0
TCGA-G4-6303	COADREAD-C2	C2:Pan-GI	C3	C4: Pan-GI (CRC)	GI.CIN	1
TCGA-5M-AAT4	COADREAD-C3	C2:Pan-GI	C3	C4: Pan-GI (CRC)	GI.CIN	1
TCGA-A6-5662	COADREAD-C3	C2:Pan-GI	C3	C4: Pan-GI (CRC)	GI.CIN	0
TCGA-DC-6158	COADREAD-C2	C2:Pan-GI	C3	C4: Pan-GI (CRC)	GI.CIN	1
TCGA-DM-A1DA	COADREAD-C1	C2:Pan-GI	C3	C18: Pan-GI (MSI)	GI.CIN	1
TCGA-AH-6549	COADREAD-C4	C2:Pan-GI	C3
TCGA-D5-5538	COADREAD-C2	C2:Pan-GI	C3	C4: Pan-GI (CRC)	GI.CIN	0
TCGA-QG-A5YW	COADREAD-C2	C2:Pan-GI	C3	C4: Pan-GI (CRC)	GI.CIN	1
TCGA-AY-A8YK	COADREAD-C4	C2:Pan-GI	C3	C4: Pan-GI (CRC)	GI.CIN	1
TCGA-DY-A0XA	COADREAD-C1	C2:Pan-GI	C3	C4: Pan-GI (CRC)	GI.CIN	0
TCGA-CA-5254	COADREAD-C1	C5:BRCA	C3	C18: Pan-GI (MSI)	GI.CIN	1
TCGA-CM-5863	COADREAD-C2	C2:Pan-GI	C12	C20: Mixed (Stromal/Immune)	GI.GS
TCGA-D5-6532	COADREAD-C2	C2:Pan-GI	C3	C4: Pan-GI (CRC)	GI.GS	0
TCGA-D5-5539	COADREAD-C2	C2:Pan-GI	C3	C4: Pan-GI (CRC)	GI.CIN	1
TCGA-A6-6138	COADREAD-C1	C2:Pan-GI	C3	C4: Pan-GI (CRC)	GI.CIN	0
TCGA-AF-A56K	COADREAD-C3	C2:Pan-GI	C3	C4: Pan-GI (CRC)	GI.CIN	1
TCGA-F4-6856	COADREAD-C1	C2:Pan-GI	C3	C4: Pan-GI (CRC)	GI.HM-indel	0
TCGA-G4-6586	COADREAD-C1	C2:Pan-GI	C3	C18: Pan-GI (MSI)	GI.HM-indel	0
TCGA-CM-6675	COADREAD-C2	C2:Pan-GI	C3	C18: Pan-GI (MSI)	GI.CIN	0
TCGA-DC-6681	COADREAD-C2	C2:Pan-GI	C3	C4: Pan-GI (CRC)	GI.CIN	0
TCGA-CA-5255	COADREAD-C4	C2:Pan-GI	C3	C4: Pan-GI (CRC)	GI.CIN	1
TCGA-DC-6154	COADREAD-C3	C2:Pan-GI	C3	C4: Pan-GI (CRC)	GI.CIN	1
TCGA-DM-A1D0	COADREAD-C4	C2:Pan-GI	C3	C2: BRCA (HER2 amp)	GI.CIN	0
TCGA-CA-6716	COADREAD-C3	C2:Pan-GI	C3	C4: Pan-GI (CRC)	GI.CIN	1
TCGA-AD-6888	COADREAD-C4	C2:Pan-GI	C3	C2: BRCA (HER2 amp)	GI.CIN	1
TCGA-EI-6882	COADREAD-C4	C2:Pan-GI	C3	C4: Pan-GI (CRC)	GI.HM-indel	0
TCGA-DY-A1H8	COADREAD-C4	C11:Pan-Gyn	C3	C4: Pan-GI (CRC)	GI.CIN	0
TCGA-BM-6198	COADREAD-C1
TCGA-F5-6810	COADREAD-C2	C2:Pan-GI	C12	C4: Pan-GI (CRC)	GI.CIN	1
TCGA-AD-6901	COADREAD-C1	C2:Pan-GI	C12	C4: Pan-GI (CRC)	GI.CIN	1
TCGA-CK-6751	COADREAD-C2	C2:Pan-GI	C3	C18: Pan-GI (MSI)	GI.GS	0
TCGA-A6-6142	COADREAD-C3	C2:Pan-GI	C12	C4: Pan-GI (CRC)	GI.CIN	1
TCGA-G4-6628	COADREAD-C1	C2:Pan-GI	C3	C18: Pan-GI (MSI)	GI.HM-indel	0
TCGA-AD-6889	COADREAD-C2	C2:Pan-GI	C3	C18: Pan-GI (MSI)	GI.HM-indel	0
TCGA-AZ-5403	COADREAD-C2	C2:Pan-GI	C3	C4: Pan-GI (CRC)	GI.CIN	1
TCGA-AY-6196	COADREAD-C1	C3:LUADwithLUSC/THCA	C12	C20: Mixed (Stromal/Immune)	GI.CIN	1
TCGA-CA-6715	COADREAD-C3	C2:Pan-GI	C3	C4: Pan-GI (CRC)	GI.CIN	0
TCGA-A6-2675	COADREAD-C2	C2:Pan-GI	C12	C4: Pan-GI (CRC)	GI.CIN	1
TCGA-AA-A01P	COADREAD-C1	C2:Pan-GI	C12	C18: Pan-GI (MSI)	GI.HM-indel	0
TCGA-AZ-6603	COADREAD-C2	C2:Pan-GI	C3	C4: Pan-GI (CRC)	GI.CIN	1
TCGA-A6-6653	COADREAD-C1	C2:Pan-GI	C3	C18: Pan-GI (MSI)	GI.HM-indel	0
TCGA-DC-4745	COADREAD-C2	C2:Pan-GI	C3	C4: Pan-GI (CRC)	GI.CIN	1
TCGA-D5-6920	COADREAD-C4	C2:Pan-GI	C3	C4: Pan-GI (CRC)	GI.GS	0
TCGA-F5-6812	COADREAD-C2	C2:Pan-GI	C12	C20: Mixed (Stromal/Immune)	GI.CIN	0
TCGA-D5-6541	COADREAD-C1	C2:Pan-GI	C3	C4: Pan-GI (CRC)	GI.CIN	0
TCGA-D5-5537	COADREAD-C2	C2:Pan-GI	C3	C4: Pan-GI (CRC)	GI.CIN	1
TCGA-AF-A56N	COADREAD-C2	C2:Pan-GI	C3	C4: Pan-GI (CRC)	GI.CIN	0
TCGA-A6-A5ZU	COADREAD-C3	C2:Pan-GI	C3	C4: Pan-GI (CRC)
TCGA-AA-3526	COADREAD-C1	C2:Pan-GI	C3	C4: Pan-GI (CRC)		0
TCGA-AF-2687	COADREAD-C3	C2:Pan-GI	C12	C20: Mixed (Stromal/Immune)	GI.CIN	1
TCGA-CM-6171	COADREAD-C4	C10:M	C3	C18: Pan-GI (MSI)	GI.HM-indel	0
TCGA-CM-5862	COADREAD-C3	C2:Pan-GI	C3	C4: Pan-GI (CRC)	GI.CIN	1
TCGA-DC-6683	COADREAD-C3	C2:Pan-GI	C3	C4: Pan-GI (CRC)	GI.CIN	1
TCGA-A6-6140	COADREAD-C4	C10:M	C3	C4: Pan-GI (CRC)		1
TCGA-F5-6861	COADREAD-C3	C2:Pan-GI	C3	C4: Pan-GI (CRC)	GI.GS	0
TCGA-D5-6534	COADREAD-C2	C2:Pan-GI	C12	C20: Mixed (Stromal/Immune)	GI.CIN	1
TCGA-D5-6531	COADREAD-C1	C2:Pan-GI	C3	C18: Pan-GI (MSI)	GI.CIN	1
TCGA-5M-AATE	COADREAD-C4	C2:Pan-GI	C3	C4: Pan-GI (CRC)	GI.CIN	1
TCGA-A6-A56B	COADREAD-C2	C2:Pan-GI	C3	C4: Pan-GI (CRC)	GI.CIN	0
TCGA-DM-A28M	COADREAD-C4	C2:Pan-GI	C3	C4: Pan-GI (CRC)	GI.CIN	1
TCGA-DY-A1DF	COADREAD-C1	C2:Pan-GI	C3	C4: Pan-GI (CRC)	GI.CIN	1
TCGA-A6-6649	COADREAD-C4	C2:Pan-GI	C12	C18: Pan-GI (MSI)	GI.CIN	1
TCGA-EF-5830	COADREAD-C4	C2:Pan-GI	C3	C4: Pan-GI (CRC)	GI.CIN	0
TCGA-AA-3655	COADREAD-C2	C2:Pan-GI	C3	C4: Pan-GI (CRC)	GI.CIN	0
TCGA-F4-6806	COADREAD-C2	C2:Pan-GI	C3	C4: Pan-GI (CRC)	GI.GS	0
TCGA-3L-AA1B	COADREAD-C4	C2:Pan-GI	C3	C4: Pan-GI (CRC)	GI.CIN	1
TCGA-G4-6314	COADREAD-C3
TCGA-CK-6747	COADREAD-C2	C2:Pan-GI	C3	C4: Pan-GI (CRC)	GI.GS	0
TCGA-CK-4950	COADREAD-C2	C2:Pan-GI	C3	C18: Pan-GI (MSI)	GI.GS	0
TCGA-D5-6529	COADREAD-C2	C2:Pan-GI	C3	C4: Pan-GI (CRC)	GI.CIN	1
TCGA-AZ-4323	COADREAD-C3	C2:Pan-GI	C12	C20: Mixed (Stromal/Immune)	GI.GS	0
TCGA-AA-A01X	COADREAD-C4	C2:Pan-GI	C3	C4: Pan-GI (CRC)	GI.CIN	1
TCGA-A6-6782	COADREAD-C2	C2:Pan-GI	C12	C4: Pan-GI (CRC)	GI.CIN	0
TCGA-G4-6317	COADREAD-C3	C2:Pan-GI	C3	C4: Pan-GI (CRC)	GI.CIN	1
TCGA-CM-6678	COADREAD-C3	C2:Pan-GI	C3	C4: Pan-GI (CRC)	GI.CIN	0
TCGA-AA-3713	COADREAD-C2	C2:Pan-GI	C3	C18: Pan-GI (MSI)	GI.HM-indel	0
TCGA-RU-A8FL	COADREAD-C4	C10:M	C3	C4: Pan-GI (CRC)	GI.CIN	1
TCGA-D5-6535	COADREAD-C4	C2:Pan-GI	C3	C4: Pan-GI (CRC)	GI.CIN	1
TCGA-D5-6930	COADREAD-C2	C2:Pan-GI	C3	C18: Pan-GI (MSI)	GI.HM-indel	0
TCGA-G5-6572	COADREAD-C3
TCGA-AZ-4313	COADREAD-C1	C2:Pan-GI	C3	C4: Pan-GI (CRC)		0
TCGA-DM-A28A	COADREAD-C1	C2:Pan-GI	C3	C4: Pan-GI (CRC)	GI.CIN	0
TCGA-AZ-4684	COADREAD-C2	C2:Pan-GI	C3	C4: Pan-GI (CRC)		1
TCGA-G4-6310	COADREAD-C3
TCGA-AZ-6598	COADREAD-C1	C2:Pan-GI	C3	C18: Pan-GI (MSI)	GI.HM-indel	0
TCGA-DM-A28F	COADREAD-C3	C2:Pan-GI	C3	C4: Pan-GI (CRC)	GI.CIN	1
TCGA-CM-5349	COADREAD-C2	C2:Pan-GI	C3	C4: Pan-GI (CRC)	GI.CIN	0
TCGA-G4-6309	COADREAD-C4	C2:Pan-GI	C3	C4: Pan-GI (CRC)	GI.HM-indel	0
TCGA-A6-2686	COADREAD-C1	C2:Pan-GI	C3	C18: Pan-GI (MSI)	GI.HM-indel	1
TCGA-CM-6169	COADREAD-C2	C2:Pan-GI	C12	C4: Pan-GI (CRC)	GI.CIN	0
TCGA-A6-6648	COADREAD-C4	C10:M	C3	C4: Pan-GI (CRC)	GI.CIN	1
TCGA-EI-6507	COADREAD-C1	C2:Pan-GI	C3	C20: Mixed (Stromal/Immune)	GI.HM-indel	0
TCGA-F4-6461	COADREAD-C2	C2:Pan-GI	C12	C18: Pan-GI (MSI)	GI.CIN	0
TCGA-CM-6168	COADREAD-C2	C2:Pan-GI	C12	C20: Mixed (Stromal/Immune)	GI.GS	0
TCGA-A6-5667	COADREAD-C2	C2:Pan-GI	C3	C4: Pan-GI (CRC)	GI.CIN	1
TCGA-DY-A1DG	COADREAD-C4	C10:M	C3	C4: Pan-GI (CRC)	GI.CIN	1
TCGA-CM-4751	COADREAD-C2	C2:Pan-GI	C3	C18: Pan-GI (MSI)	GI.CIN	0
TCGA-G5-6233	COADREAD-C4
TCGA-AY-A71X	COADREAD-C4	C9:THYM/TGCT	C3	C4: Pan-GI (CRC)	GI.GS	0
TCGA-QG-A5YV	COADREAD-C4	C2:Pan-GI	C3	C4: Pan-GI (CRC)	GI.CIN	1
TCGA-AZ-6605	COADREAD-C2	C2:Pan-GI	C12	C4: Pan-GI (CRC)	GI.CIN	1
TCGA-F4-6704	COADREAD-C2	C2:Pan-GI	C12	C20: Mixed (Stromal/Immune)	GI.CIN	1
TCGA-AD-6890	COADREAD-C2	C2:Pan-GI	C3	C4: Pan-GI (CRC)	GI.CIN	0
TCGA-CM-5860	COADREAD-C2	C2:Pan-GI	C3	C4: Pan-GI (CRC)	GI.CIN	1
TCGA-AA-3506	COADREAD-C2	C2:Pan-GI	C3	C4: Pan-GI (CRC)	GI.GS	0
TCGA-F4-6808	COADREAD-C4	C2:Pan-GI	C3	C4: Pan-GI (CRC)	GI.CIN	1
TCGA-AG-3731	COADREAD-C3	C2:Pan-GI	C12	C20: Mixed (Stromal/Immune)	GI.CIN	1
TCGA-G4-6626	COADREAD-C1	C2:Pan-GI	C3	C4: Pan-GI (CRC)	GI.CIN	1
TCGA-CI-6622	COADREAD-C3	C2:Pan-GI	C3	C4: Pan-GI (CRC)	GI.CIN	0
TCGA-A6-5664	COADREAD-C3	C11:Pan-Gyn	C12	C20: Mixed (Stromal/Immune)	GI.GS	0
TCGA-F5-6863	COADREAD-C3	C2:Pan-GI	C3	C4: Pan-GI (CRC)	GI.CIN	1
TCGA-NH-A50T	COADREAD-C2	C2:Pan-GI	C3	C4: Pan-GI (CRC)	GI.CIN	1
TCGA-CM-6166	COADREAD-C3	C2:Pan-GI	C3	C4: Pan-GI (CRC)	GI.CIN	1
TCGA-CM-6167	COADREAD-C2	C2:Pan-GI	C12	C20: Mixed (Stromal/Immune)	GI.CIN	1
TCGA-EF-5831	COADREAD-C2	C2:Pan-GI	C3	C4: Pan-GI (CRC)		1
TCGA-A6-6781	COADREAD-C1	C3:LUADwithLUSC/THCA	C12			0
TCGA-G4-6295	COADREAD-C3	C2:Pan-GI	C3	C4: Pan-GI (CRC)	GI.CIN	1
TCGA-CM-6165	COADREAD-C2	C2:Pan-GI	C3	C4: Pan-GI (CRC)	GI.CIN	0
TCGA-AH-6897	COADREAD-C4	C2:Pan-GI	C3	C4: Pan-GI (CRC)	GI.CIN	0
TCGA-A6-6780	COADREAD-C1	C2:Pan-GI	C3			0
TCGA-D5-6928	COADREAD-C1	C2:Pan-GI	C12	C20: Mixed (Stromal/Immune)	GI.HM-indel	0
TCGA-DM-A28K	COADREAD-C4	C10:M	C3	C4: Pan-GI (CRC)	GI.CIN	0
TCGA-AD-6548	COADREAD-C1	C2:Pan-GI	C3	C4: Pan-GI (CRC)	GI.GS	0
TCGA-CM-6164	COADREAD-C3	C2:Pan-GI	C3	C4: Pan-GI (CRC)	GI.CIN	1
TCGA-AZ-6607	COADREAD-C1	C2:Pan-GI	C12	C14: LUAD		1
TCGA-G5-6235	COADREAD-C4
TCGA-CL-5917	COADREAD-C3	C2:Pan-GI	C3	C4: Pan-GI (CRC)	GI.CIN	1
TCGA-AF-2690	COADREAD-C2	C2:Pan-GI	C12	C20: Mixed (Stromal/Immune)	GI.CIN	1
TCGA-G4-6625	COADREAD-C3
TCGA-AF-3911	COADREAD-C2	C2:Pan-GI	C3	C4: Pan-GI (CRC)	GI.CIN	1
TCGA-D5-6540	COADREAD-C1	C2:Pan-GI	C3	C18: Pan-GI (MSI)	GI.HM-indel	0
TCGA-AA-A01Z	COADREAD-C2	C2:Pan-GI	C3	C4: Pan-GI (CRC)	GI.CIN	0
TCGA-AF-5654	COADREAD-C4	C2:Pan-GI	C3			0
TCGA-AU-6004	COADREAD-C1	C2:Pan-GI	C3	C18: Pan-GI (MSI)	GI.HM-indel	0
TCGA-AA-3496	COADREAD-C1	C2:Pan-GI	C3	C4: Pan-GI (CRC)	GI.CIN	1
TCGA-D5-6530	COADREAD-C1	C2:Pan-GI	C3	C4: Pan-GI (CRC)	GI.HM-indel	0
TCGA-DM-A1D9	COADREAD-C2	C2:Pan-GI	C3	C4: Pan-GI (CRC)	GI.CIN	0
TCGA-G4-6588	COADREAD-C1	C2:Pan-GI	C3	C18: Pan-GI (MSI)	GI.HM-indel	0
TCGA-DM-A282	COADREAD-C3	C2:Pan-GI	C3	C4: Pan-GI (CRC)	GI.CIN	0
TCGA-CK-5913	COADREAD-C1	C2:Pan-GI	C3	C18: Pan-GI (MSI)	GI.HM-indel	0
TCGA-F5-6465	COADREAD-C2	C2:Pan-GI	C12	C20: Mixed (Stromal/Immune)	GI.GS	1
TCGA-G4-6293	COADREAD-C4	C2:Pan-GI	C3	C4: Pan-GI (CRC)	GI.GS	0
TCGA-AG-4022	COADREAD-C3	C2:Pan-GI	C3	C4: Pan-GI (CRC)	GI.CIN	1
TCGA-AH-6643	COADREAD-C3	C2:Pan-GI	C3	C4: Pan-GI (CRC)	GI.CIN	1
TCGA-F5-6811	COADREAD-C2	C2:Pan-GI	C3	C4: Pan-GI (CRC)	GI.CIN	1
TCGA-F4-6460	COADREAD-C3	C2:Pan-GI	C3	C4: Pan-GI (CRC)	GI.CIN	1
TCGA-EI-6508	COADREAD-C2	C2:Pan-GI	C3	C4: Pan-GI (CRC)	GI.CIN	0
TCGA-CM-6161	COADREAD-C2	C2:Pan-GI	C3	C4: Pan-GI (CRC)	GI.GS	1
TCGA-DM-A1D7	COADREAD-C4	C2:Pan-GI	C3	C4: Pan-GI (CRC)	GI.GS	0
TCGA-CM-4743	COADREAD-C1	C2:Pan-GI	C3	C18: Pan-GI (MSI)	GI.HM-indel	0
TCGA-AD-6899	COADREAD-C2	C2:Pan-GI	C12	C4: Pan-GI (CRC)	GI.CIN	1
TCGA-AA-3685	COADREAD-C2	C2:Pan-GI	C3	C4: Pan-GI (CRC)	GI.CIN	1
TCGA-CI-6621	COADREAD-C3	C11:Pan-Gyn	C3	C4: Pan-GI (CRC)	GI.CIN	1
TCGA-DM-A28E	COADREAD-C4	C2:Pan-GI	C3	C4: Pan-GI (CRC)	GI.CIN	0
TCGA-NH-A6GB	COADREAD-C4	C2:Pan-GI	C3	C4: Pan-GI (CRC)	GI.CIN	0
TCGA-AZ-4315	COADREAD-C2	C2:Pan-GI	C3	C4: Pan-GI (CRC)	GI.HM-SNV	0
TCGA-DC-6155	COADREAD-C4	C2:Pan-GI	C3	C4: Pan-GI (CRC)	GI.CIN	1
TCGA-DY-A1DD	COADREAD-C3	C2:Pan-GI	C3	C4: Pan-GI (CRC)	GI.CIN	0
TCGA-CM-4744	COADREAD-C4	C2:Pan-GI	C3	C18: Pan-GI (MSI)	GI.CIN	0
TCGA-AY-6386	COADREAD-C2	C2:Pan-GI	C3	C4: Pan-GI (CRC)	GI.GS	0
TCGA-D5-6533	COADREAD-C4	C2:Pan-GI	C3	C4: Pan-GI (CRC)	GI.CIN	1
TCGA-DC-5337	COADREAD-C3	C2:Pan-GI	C3	C4: Pan-GI (CRC)	GI.GS	0
TCGA-QG-A5Z2	COADREAD-C4	C10:M	C3	C18: Pan-GI (MSI)	GI.HM-indel	0
TCGA-AA-3492	COADREAD-C2	C2:Pan-GI	C3	C18: Pan-GI (MSI)	GI.HM-indel	0
TCGA-AZ-6601	COADREAD-C1
TCGA-CM-6676	COADREAD-C2	C2:Pan-GI	C3	C4: Pan-GI (CRC)	GI.CIN	1
TCGA-CA-5796	COADREAD-C4	C10:M	C3	C4: Pan-GI (CRC)	GI.GS	0
TCGA-A6-5659	COADREAD-C3	C2:Pan-GI	C3			0
TCGA-AY-A69D	COADREAD-C2	C2:Pan-GI	C3	C4: Pan-GI (CRC)	GI.CIN	1
TCGA-A6-5657	COADREAD-C2	C2:Pan-GI	C12	C20: Mixed (Stromal/Immune)	GI.CIN	0
TCGA-CK-6748	COADREAD-C2	C2:Pan-GI	C3	C4: Pan-GI (CRC)	GI.CIN	1
TCGA-F4-6854	COADREAD-C3	C2:Pan-GI	C3	C4: Pan-GI (CRC)	GI.CIN	0
TCGA-D5-6924	COADREAD-C3	C2:Pan-GI	C12	C4: Pan-GI (CRC)	GI.CIN	1
TCGA-AZ-4614	COADREAD-C4	C2:Pan-GI	C3	C18: Pan-GI (MSI)	GI.CIN	0
TCGA-D5-6539	COADREAD-C4	C10:M	C3	C4: Pan-GI (CRC)	GI.CIN	1
TCGA-CM-5348	COADREAD-C1	C2:Pan-GI	C12	C4: Pan-GI (CRC)	GI.CIN	1
TCGA-EI-6510	COADREAD-C4	C10:M	C3	C4: Pan-GI (CRC)	GI.GS	0
TCGA-AG-3592	COADREAD-C4	C2:Pan-GI	C3	C4: Pan-GI (CRC)	GI.CIN	1
TCGA-AZ-6608	COADREAD-C4
TCGA-NH-A8F8	COADREAD-C3	C2:Pan-GI	C3	C4: Pan-GI (CRC)	GI.CIN	1
TCGA-DM-A0XF	COADREAD-C2	C2:Pan-GI	C3	C4: Pan-GI (CRC)	GI.CIN	1
TCGA-AF-4110	COADREAD-C3	C2:Pan-GI	C3	C4: Pan-GI (CRC)	GI.CIN	1
TCGA-DM-A1D8	COADREAD-C4	C2:Pan-GI	C3	C4: Pan-GI (CRC)	GI.CIN	1
TCGA-NH-A6GA	COADREAD-C2	C2:Pan-GI	C3	C4: Pan-GI (CRC)	GI.CIN	1
TCGA-DM-A28H	COADREAD-C4	C2:Pan-GI	C3	C4: Pan-GI (CRC)	GI.CIN	0
TCGA-A6-6137	COADREAD-C4	C10:M	C3	C4: Pan-GI (CRC)	GI.CIN	0
TCGA-D5-6926	COADREAD-C1	C2:Pan-GI	C3	C4: Pan-GI (CRC)	GI.CIN	1
TCGA-AZ-5407	COADREAD-C4	C10:M	C3	C18: Pan-GI (MSI)	GI.GS	0
TCGA-NH-A6GC	COADREAD-C2	C2:Pan-GI	C3	C4: Pan-GI (CRC)	GI.CIN	1
TCGA-CK-5915	COADREAD-C4	C10:M	C3	C4: Pan-GI (CRC)	GI.CIN	1
TCGA-DC-4749	COADREAD-C3	C2:Pan-GI	C3	C4: Pan-GI (CRC)	GI.CIN	1
TCGA-AA-3495	COADREAD-C2	C2:Pan-GI	C3	C4: Pan-GI (CRC)		0
TCGA-CK-4952	COADREAD-C4	C2:Pan-GI	C3	C18: Pan-GI (MSI)	GI.CIN	0
TCGA-CM-6172	COADREAD-C4	C2:Pan-GI	C3	C4: Pan-GI (CRC)	GI.CIN	0
TCGA-DM-A1HB	COADREAD-C1	C2:Pan-GI	C3	C18: Pan-GI (MSI)	GI.HM-indel	0
TCGA-AF-2693	COADREAD-C2	C2:Pan-GI	C3	C4: Pan-GI (CRC)	GI.CIN	0
TCGA-AZ-4615	COADREAD-C1	C2:Pan-GI	C3	C18: Pan-GI (MSI)	GI.HM-indel	0
TCGA-F4-6855	COADREAD-C1	C2:Pan-GI	C12	C4: Pan-GI (CRC)	GI.GS	1
TCGA-AA-3509	COADREAD-C4	C2:Pan-GI	C3
TCGA-CM-6674	COADREAD-C1	C2:Pan-GI	C3	C20: Mixed (Stromal/Immune)	GI.HM-indel	0
TCGA-DM-A1D4	COADREAD-C4	C10:M	C3	C4: Pan-GI (CRC)	GI.CIN	0
TCGA-NH-A50U	COADREAD-C2	C2:Pan-GI	C3	C4: Pan-GI (CRC)	GI.CIN	1
TCGA-CK-5916	COADREAD-C1	C2:Pan-GI	C3	C18: Pan-GI (MSI)	GI.HM-indel	0
TCGA-EI-6512	COADREAD-C4	C2:Pan-GI	C3	C4: Pan-GI (CRC)	GI.CIN	1
TCGA-DC-6157	COADREAD-C3	C2:Pan-GI	C3	C4: Pan-GI (CRC)	GI.CIN	1
TCGA-F5-6864	COADREAD-C2	C2:Pan-GI	C12	C4: Pan-GI (CRC)	GI.CIN	0
TCGA-G4-6294	COADREAD-C4	C2:Pan-GI	C3	C4: Pan-GI (CRC)	GI.CIN	0
TCGA-D5-6929	COADREAD-C1	C2:Pan-GI	C3	C4: Pan-GI (CRC)	GI.CIN	1
TCGA-A6-6651	COADREAD-C3	C2:Pan-GI	C12	C20: Mixed (Stromal/Immune)	GI.CIN	1
TCGA-F4-6459	COADREAD-C2	C2:Pan-GI	C12	C4: Pan-GI (CRC)	GI.CIN	1
TCGA-EI-6506	COADREAD-C4	C10:M	C3	C4: Pan-GI (CRC)	GI.CIN	0
TCGA-T9-A92H	COADREAD-C2	C2:Pan-GI	C3	C4: Pan-GI (CRC)	GI.CIN	0
TCGA-AA-3712	COADREAD-C2	C2:Pan-GI	C3	C4: Pan-GI (CRC)	GI.CIN	1
TCGA-CM-6170	COADREAD-C2	C2:Pan-GI	C3	C4: Pan-GI (CRC)	GI.CIN	0
TCGA-CA-6719	COADREAD-C2	C2:Pan-GI	C3	C4: Pan-GI (CRC)	GI.CIN	1
TCGA-DM-A285	COADREAD-C2	C2:Pan-GI	C3	C4: Pan-GI (CRC)	GI.CIN	1
TCGA-D5-6538	COADREAD-C4	C2:Pan-GI	C3	C18: Pan-GI (MSI)	GI.CIN	1
TCGA-DC-6160	COADREAD-C4	C10:M	C3	C4: Pan-GI (CRC)	GI.CIN	0
TCGA-D5-6922	COADREAD-C2	C2:Pan-GI	C3	C4: Pan-GI (CRC)	GI.CIN	1
TCGA-4N-A93T	COADREAD-C4	C2:Pan-GI	C3	C4: Pan-GI (CRC)	GI.CIN	0
TCGA-D5-5540	COADREAD-C3	C2:Pan-GI	C3	C4: Pan-GI (CRC)	GI.CIN	0
TCGA-QL-A97D	COADREAD-C4	C10:M	C3	C4: Pan-GI (CRC)	GI.CIN	1
TCGA-CM-4747	COADREAD-C2	C2:Pan-GI	C3	C4: Pan-GI (CRC)	GI.CIN	1
TCGA-EI-7004	COADREAD-C2	C2:Pan-GI	C12	C20: Mixed (Stromal/Immune)	GI.CIN	0
TCGA-DM-A288	COADREAD-C1	C2:Pan-GI	C3	C4: Pan-GI (CRC)	GI.CIN	1
TCGA-D5-6923	COADREAD-C2	C2:Pan-GI	C3	C4: Pan-GI (CRC)		0
TCGA-DY-A1DE	COADREAD-C1	C2:Pan-GI	C3	C13: Mixed (Chr 8 del)		1
TCGA-F5-6702	COADREAD-C2	C2:Pan-GI	C12	C4: Pan-GI (CRC)	GI.CIN	1
TCGA-A6-A567	COADREAD-C2	C2:Pan-GI	C3	C4: Pan-GI (CRC)	GI.CIN	0
TCGA-A6-5660	COADREAD-C3	C2:Pan-GI	C3	C4: Pan-GI (CRC)	GI.CIN	1
TCGA-F4-6809	COADREAD-C1	C2:Pan-GI	C12	C20: Mixed (Stromal/Immune)	GI.CIN	0
TCGA-G4-6321	COADREAD-C4	C10:M	C3	C18: Pan-GI (MSI)	GI.GS	0
TCGA-G4-6302	COADREAD-C1	C5:BRCA	C12	C20: Mixed (Stromal/Immune)	GI.HM-indel	0
TCGA-AY-5543	COADREAD-C4	C2:Pan-GI	C3	C4: Pan-GI (CRC)	GI.CIN	0
TCGA-NH-A5IV	COADREAD-C1	C2:Pan-GI	C3	C4: Pan-GI (CRC)	GI.HM-indel	0
TCGA-SS-A7HO	COADREAD-C4	C11:Pan-Gyn	C3	C4: Pan-GI (CRC)	GI.CIN	1
TCGA-5M-AAT6	COADREAD-C1	C2:Pan-GI	C12	C20: Mixed (Stromal/Immune)	GI.HM-indel	0
TCGA-AG-3742	COADREAD-C2	C2:Pan-GI	C3	C4: Pan-GI (CRC)	GI.CIN	0
TCGA-A6-6654	COADREAD-C1	C2:Pan-GI	C12	C20: Mixed (Stromal/Immune)	GI.CIN	1
TCGA-CM-6680	COADREAD-C2	C2:Pan-GI	C3	C4: Pan-GI (CRC)	GI.CIN	0
TCGA-G4-6298	COADREAD-C3	C2:Pan-GI	C3	C4: Pan-GI (CRC)	GI.CIN	1
TCGA-G4-6299	COADREAD-C1	C2:Pan-GI	C3	C18: Pan-GI (MSI)	GI.CIN	1
TCGA-G5-6641	COADREAD-C4	C10:M	C3	C4: Pan-GI (CRC)	GI.CIN	0
TCGA-CL-5918	COADREAD-C4	C2:Pan-GI	C3	C4: Pan-GI (CRC)	GI.CIN	0
TCGA-AA-A02Y	COADREAD-C4	C10:M	C3	C4: Pan-GI (CRC)	GI.GS	0
TCGA-AF-6136	COADREAD-C4	C2:Pan-GI	C3	C4: Pan-GI (CRC)	GI.CIN	1
TCGA-AA-3489	COADREAD-C1	C3:LUADwithLUSC/THCA	C12	C20: Mixed (Stromal/Immune)	GI.CIN	0
TCGA-A6-A566	COADREAD-C1	C2:Pan-GI	C12	C18: Pan-GI (MSI)	GI.GS	0
TCGA-D5-6932	COADREAD-C3	C2:Pan-GI	C3	C4: Pan-GI (CRC)	GI.CIN	1
TCGA-CK-5912	COADREAD-C4	C2:Pan-GI	C3	C4: Pan-GI (CRC)	GI.CIN	1
TCGA-DM-A0XD	COADREAD-C1	C2:Pan-GI	C3	C18: Pan-GI (MSI)	GI.CIN	0
TCGA-QG-A5Z1	COADREAD-C3	C2:Pan-GI	C3	C4: Pan-GI (CRC)	GI.CIN	0
TCGA-EI-6884	COADREAD-C2	C2:Pan-GI	C3	C4: Pan-GI (CRC)	GI.CIN	0
TCGA-G4-6315	COADREAD-C4	C10:M	C3	C4: Pan-GI (CRC)	GI.CIN	1
TCGA-AZ-6606	COADREAD-C4	C10:M	C3	C18: Pan-GI (MSI)	GI.CIN	0
TCGA-AD-A5EK	COADREAD-C2	C2:Pan-GI	C3	C4: Pan-GI (CRC)	GI.CIN	1
TCGA-A6-5665	COADREAD-C1	C2:Pan-GI	C3	C18: Pan-GI (MSI)	GI.HM-indel	0
TCGA-CA-6717	COADREAD-C1	C2:Pan-GI	C12	C20: Mixed (Stromal/Immune)	GI.HM-SNV
TCGA-CM-6677	COADREAD-C2	C2:Pan-GI	C3	C4: Pan-GI (CRC)	GI.CIN	1
TCGA-EI-6514	COADREAD-C3	C2:Pan-GI	C3	C4: Pan-GI (CRC)	GI.CIN	1
TCGA-AM-5821	COADREAD-C1	C2:Pan-GI	C3	C18: Pan-GI (MSI)	GI.HM-indel	0
TCGA-AA-3663	COADREAD-C4	C2:Pan-GI	C3	C18: Pan-GI (MSI)	GI.HM-indel	0
TCGA-A6-2684	COADREAD-C2	C2:Pan-GI	C3			0
TCGA-G4-6320	COADREAD-C4	C2:Pan-GI	C3	C18: Pan-GI (MSI)	GI.HM-indel	0
TCGA-AF-6655	COADREAD-C2	C2:Pan-GI	C3	C4: Pan-GI (CRC)	GI.CIN	1
TCGA-NH-A50V	COADREAD-C2	C2:Pan-GI	C3	C4: Pan-GI (CRC)	GI.CIN	0
TCGA-AF-6672	COADREAD-C4	C2:Pan-GI	C3	C4: Pan-GI (CRC)	GI.CIN	1
TCGA-AD-A5EJ	COADREAD-C1	C2:Pan-GI	C3	C18: Pan-GI (MSI)	GI.HM-indel	0
TCGA-G4-6297	COADREAD-C2	C2:Pan-GI	C12	C4: Pan-GI (CRC)	GI.CIN	1
TCGA-F5-6813	COADREAD-C3	C2:Pan-GI	C3	C4: Pan-GI (CRC)	GI.CIN	1
TCGA-EI-6509	COADREAD-C1	C2:Pan-GI	C3	C4: Pan-GI (CRC)	GI.CIN	0
TCGA-F4-6569	COADREAD-C1	C5:BRCA	C12	C20: Mixed (Stromal/Immune)	GI.CIN	0
TCGA-D5-7000	COADREAD-C2	C2:Pan-GI	C3	C18: Pan-GI (MSI)	GI.CIN	0
TCGA-DC-6682	COADREAD-C2	C2:Pan-GI	C3	C4: Pan-GI (CRC)	GI.CIN	1
TCGA-F4-6570	COADREAD-C1	C2:Pan-GI	C3	C18: Pan-GI (MSI)	GI.HM-indel	0
TCGA-DC-5869	COADREAD-C2	C2:Pan-GI	C3	C4: Pan-GI (CRC)	GI.CIN	1
TCGA-DM-A28C	COADREAD-C4	C2:Pan-GI	C3	C4: Pan-GI (CRC)	GI.GS	0
TCGA-A6-5656	COADREAD-C4	C2:Pan-GI	C3			0
TCGA-G4-6304	COADREAD-C1	C2:Pan-GI	C3	C4: Pan-GI (CRC)	GI.HM-indel	0
TCGA-A6-5666	COADREAD-C3	C2:Pan-GI	C3	C4: Pan-GI (CRC)	GI.CIN	0
TCGA-CA-5797	COADREAD-C2	C2:Pan-GI	C3	C4: Pan-GI (CRC)	GI.CIN	1
TCGA-DM-A280	COADREAD-C1	C2:Pan-GI	C3	C4: Pan-GI (CRC)	GI.GS	0
TCGA-A6-4105	COADREAD-C3	C2:Pan-GI	C3	C18: Pan-GI (MSI)	GI.CIN	1
TCGA-AD-6965	COADREAD-C2	C2:Pan-GI	C3	C4: Pan-GI (CRC)	GI.CIN	1
TCGA-EI-7002	COADREAD-C2	C2:Pan-GI	C3	C4: Pan-GI (CRC)	GI.CIN	1
TCGA-AG-3732	COADREAD-C4	C10:M	C3	C4: Pan-GI (CRC)	GI.CIN	0
TCGA-EI-6883	COADREAD-C3	C2:Pan-GI	C3	C4: Pan-GI (CRC)	GI.CIN	1
TCGA-AD-6895	COADREAD-C1	C2:Pan-GI	C3	C18: Pan-GI (MSI)	GI.HM-indel	0
TCGA-QG-A5YX	COADREAD-C4	C10:M	C3	C4: Pan-GI (CRC)	GI.CIN	0
TCGA-CK-4951	COADREAD-C1	C2:Pan-GI	C3	C18: Pan-GI (MSI)	GI.HM-indel	0
TCGA-G4-6307	COADREAD-C4	C2:Pan-GI	C3	C4: Pan-GI (CRC)	GI.CIN	1
TCGA-D5-5541	COADREAD-C3	C2:Pan-GI	C3	C4: Pan-GI (CRC)	GI.CIN	1

## Sheet: ESCA
	colCluster	PanCan colCluster	PanCan mCluster	Hoadley iCluster	TCGA Subtype	High Aneuploidy
TCGA-LN-A49M	ESCA-C4	C1:Pan-Squamous	C5	C25: Pan-SCC (Chr 11 amp)	GI.ESCC
TCGA-IG-A7DP	ESCA-C1	C3:LUADwithLUSC/THCA	C12			0
TCGA-L5-A4OW	ESCA-C1	C2:Pan-GI	C3	C18: Pan-GI (MSI)	GI.CIN	1
TCGA-Z6-A9VB	ESCA-C4	C1:Pan-Squamous	C10	C25: Pan-SCC (Chr 11 amp)	GI.ESCC	0
TCGA-L5-A88V	ESCA-C1	C2:Pan-GI	C3	C25: Pan-SCC (Chr 11 amp)	GI.CIN	1
TCGA-IG-A3Y9	ESCA-C4	C1:Pan-Squamous	C5	C25: Pan-SCC (Chr 11 amp)	GI.ESCC	1
TCGA-IG-A51D	ESCA-C4	C1:Pan-Squamous	C5	C25: Pan-SCC (Chr 11 amp)	GI.ESCC	1
TCGA-LN-A4A6	ESCA-C4	C1:Pan-Squamous	C5	C25: Pan-SCC (Chr 11 amp)	GI.ESCC
TCGA-VR-A8Q7	ESCA-C4	C1:Pan-Squamous	C10	C10: Pan-SCC		1
TCGA-IG-A50L	ESCA-C4	C1:Pan-Squamous	C5	C10: Pan-SCC	GI.ESCC	1
TCGA-LN-A49K	ESCA-C2	C1:Pan-Squamous	C5	C10: Pan-SCC	GI.ESCC	0
TCGA-V5-AASW	ESCA-C3	C10:M	C3	C18: Pan-GI (MSI)	GI.CIN	1
TCGA-L7-A6VZ	ESCA-C3	C10:M	C3	C18: Pan-GI (MSI)	GI.CIN
TCGA-IC-A6RE	ESCA-C3	C10:M	C12	C18: Pan-GI (MSI)	GI.HM-SNV	0
TCGA-2H-A9GQ	ESCA-C1	C4:Pan-GynwithSARC	C7	C10: Pan-SCC		1
TCGA-L5-A8NJ	ESCA-C3	C2:Pan-GI	C3	C18: Pan-GI (MSI)	GI.CIN	1
TCGA-2H-A9GR	ESCA-C3	C10:M	C12	C18: Pan-GI (MSI)	GI.CIN	0
TCGA-L5-A4OM	ESCA-C2	C8:PRAD	C5	C25: Pan-SCC (Chr 11 amp)	GI.ESCC	0
TCGA-Q9-A6FU	ESCA-C4	C1:Pan-Squamous	C5	C10: Pan-SCC	GI.ESCC	0
TCGA-2H-A9GF	ESCA-C1	C2:Pan-GI	C3	C2: BRCA (HER2 amp)	GI.CIN	1
TCGA-2H-A9GK	ESCA-C3	C10:M	C3	C20: Mixed (Stromal/Immune)	GI.CIN	0
TCGA-LN-A4MR	ESCA-C4	C1:Pan-Squamous	C5	C25: Pan-SCC (Chr 11 amp)	GI.ESCC	1
TCGA-L5-A8NM	ESCA-C1	C2:Pan-GI	C3	C18: Pan-GI (MSI)	GI.HM-indel	0
TCGA-2H-A9GM	ESCA-C3	C10:M	C3	C18: Pan-GI (MSI)	GI.CIN
TCGA-LN-A9FQ	ESCA-C4	C5:BRCA	C5	C10: Pan-SCC	GI.ESCC	1
TCGA-L5-A8NR	ESCA-C4	C2:Pan-GI	C3	C18: Pan-GI (MSI)	GI.CIN	1
TCGA-L5-A4OO	ESCA-C1	C2:Pan-GI	C12	C20: Mixed (Stromal/Immune)	GI.CIN	0
TCGA-L5-A4OH	ESCA-C3	C10:M	C3	C18: Pan-GI (MSI)	GI.CIN	1
TCGA-KH-A6WC	ESCA-C2	C1:Pan-Squamous	C10	C27: PAN-SCC (HPV)	GI.ESCC	0
TCGA-L5-A891	ESCA-C1	C2:Pan-GI	C3	C4: Pan-GI (CRC)	GI.CIN	0
TCGA-LN-A4A3	ESCA-C2	C1:Pan-Squamous	C10	C25: Pan-SCC (Chr 11 amp)	GI.ESCC	1
TCGA-LN-A49O	ESCA-C4	C1:Pan-Squamous	C10	C27: PAN-SCC (HPV)	GI.ESCC	1
TCGA-LN-A5U7	ESCA-C4	C1:Pan-Squamous	C10	C25: Pan-SCC (Chr 11 amp)	GI.ESCC	1
TCGA-S8-A6BV	ESCA-C3	C10:M	C12	C20: Mixed (Stromal/Immune)	GI.CIN	1
TCGA-Z6-A8JE	ESCA-C4	C5:BRCA	C5	C25: Pan-SCC (Chr 11 amp)	GI.ESCC	1
TCGA-JY-A6FG	ESCA-C4	C1:Pan-Squamous	C10	C27: PAN-SCC (HPV)	GI.ESCC	0
TCGA-L5-A4OS	ESCA-C1	C10:M	C12	C20: Mixed (Stromal/Immune)	GI.CIN	0
TCGA-L5-A8NU	ESCA-C1	C10:M	C12	C20: Mixed (Stromal/Immune)	GI.CIN	0
TCGA-2H-A9GI	ESCA-C3	C10:M	C3	C18: Pan-GI (MSI)	GI.CIN	1
TCGA-LN-A49X	ESCA-C4	C1:Pan-Squamous	C5	C10: Pan-SCC	GI.ESCC	0
TCGA-L5-A4OF	ESCA-C3	C10:M	C12	C20: Mixed (Stromal/Immune)	GI.GS	0
TCGA-VR-AA4D	ESCA-C3	C2:Pan-GI	C3	C2: BRCA (HER2 amp)	GI.CIN	1
TCGA-L5-A43I	ESCA-C3	C10:M	C3	C18: Pan-GI (MSI)	GI.CIN	0
TCGA-LN-A49W	ESCA-C4	C1:Pan-Squamous	C5	C25: Pan-SCC (Chr 11 amp)	GI.ESCC
TCGA-IG-A97H	ESCA-C4	C1:Pan-Squamous	C10	C10: Pan-SCC	GI.ESCC
TCGA-LN-A49Y	ESCA-C4	C1:Pan-Squamous	C5	C7: Mixed (Chr 9 del)	GI.ESCC	0
TCGA-RE-A7BO	ESCA-C4	C2:Pan-GI	C3	C18: Pan-GI (MSI)	GI.CIN	1
TCGA-L5-A8NV	ESCA-C3	C10:M	C12	C18: Pan-GI (MSI)	GI.CIN	1
TCGA-IG-A3I8	ESCA-C2	C1:Pan-Squamous	C5	C25: Pan-SCC (Chr 11 amp)	GI.ESCC	1
TCGA-LN-A9FP	ESCA-C3	C10:M	C7	C20: Mixed (Stromal/Immune)	GI.ESCC	0
TCGA-V5-A7RB	ESCA-C3	C10:M	C3	C18: Pan-GI (MSI)	GI.CIN	0
TCGA-L5-A4OG	ESCA-C3	C10:M	C3	C18: Pan-GI (MSI)	GI.CIN	1
TCGA-L5-A8NW	ESCA-C4	C1:Pan-Squamous	C5	C18: Pan-GI (MSI)	GI.CIN	0
TCGA-IG-A5S3	ESCA-C3	C9:THYM/TGCT	C5	C25: Pan-SCC (Chr 11 amp)	GI.ESCC	1
TCGA-IG-A4QT	ESCA-C3	C14:KIRP	C14			0
TCGA-LN-A4A5	ESCA-C4	C1:Pan-Squamous	C5	C25: Pan-SCC (Chr 11 amp)	GI.ESCC	0
TCGA-LN-A4A8	ESCA-C1	C3:LUADwithLUSC/THCA	C5	C25: Pan-SCC (Chr 11 amp)	GI.ESCC	0
TCGA-R6-A8WG	ESCA-C3	C10:M	C3	C10: Pan-SCC	GI.CIN	1
TCGA-IG-A4QS	ESCA-C4	C2:Pan-GI	C3	C4: Pan-GI (CRC)	GI.CIN	1
TCGA-LN-A7HZ	ESCA-C4	C1:Pan-Squamous	C5	C25: Pan-SCC (Chr 11 amp)	GI.ESCC	1
TCGA-IG-A3QL	ESCA-C4	C1:Pan-Squamous	C5	C10: Pan-SCC	GI.ESCC
TCGA-L5-A8NE	ESCA-C3	C10:M	C3	C20: Mixed (Stromal/Immune)	GI.CIN	0
TCGA-VR-A8ER	ESCA-C4	C5:BRCA	C5	C25: Pan-SCC (Chr 11 amp)	GI.ESCC	0
TCGA-2H-A9GG	ESCA-C1	C2:Pan-GI	C12
TCGA-LN-A4MQ	ESCA-C4	C1:Pan-Squamous	C10	C10: Pan-SCC	GI.ESCC	0
TCGA-LN-A9FR	ESCA-C4	C1:Pan-Squamous	C5	C10: Pan-SCC	GI.ESCC	0
TCGA-L5-A8NK	ESCA-C4	C1:Pan-Squamous	C5	C25: Pan-SCC (Chr 11 amp)	GI.ESCC	0
TCGA-R6-A6KZ	ESCA-C1	C2:Pan-GI	C12	C20: Mixed (Stromal/Immune)	GI.CIN	1
TCGA-VR-AA7B	ESCA-C4	C1:Pan-Squamous	C5	C25: Pan-SCC (Chr 11 amp)	GI.ESCC	1
TCGA-L5-A43C	ESCA-C1	C2:Pan-GI	C12	C18: Pan-GI (MSI)	GI.CIN	1
TCGA-IG-A97I	ESCA-C4	C1:Pan-Squamous	C5	C25: Pan-SCC (Chr 11 amp)	GI.ESCC	0
TCGA-L5-A43J	ESCA-C4	C1:Pan-Squamous	C5	C10: Pan-SCC	GI.ESCC	1
TCGA-Q9-A6FW	ESCA-C3	C10:M	C12	C20: Mixed (Stromal/Immune)	GI.CIN	0
TCGA-L5-A8NL	ESCA-C1	C4:Pan-GynwithSARC	C12	C18: Pan-GI (MSI)	GI.CIN	0
TCGA-VR-A8EP	ESCA-C2	C10:M	C10	C10: Pan-SCC	GI.ESCC	1
TCGA-IG-A3YA	ESCA-C4	C1:Pan-Squamous	C5	C25: Pan-SCC (Chr 11 amp)	GI.ESCC	0
TCGA-Z6-AAPN	ESCA-C4	C1:Pan-Squamous	C10	C10: Pan-SCC	GI.ESCC	1
TCGA-IG-A625	ESCA-C4	C1:Pan-Squamous	C5	C10: Pan-SCC	GI.ESCC	0
TCGA-JY-A93F	ESCA-C2	C1:Pan-Squamous	C10	C27: PAN-SCC (HPV)	GI.ESCC	0
TCGA-JY-A6FE	ESCA-C2	C10:M	C5	C17: BRCA (Chr 8q amp)	GI.ESCC	1
TCGA-L5-A88Z	ESCA-C4	C1:Pan-Squamous	C5	C27: PAN-SCC (HPV)	GI.ESCC	0
TCGA-LN-A49R	ESCA-C4	C1:Pan-Squamous	C5	C25: Pan-SCC (Chr 11 amp)	GI.ESCC	1
TCGA-IC-A6RF	ESCA-C2
TCGA-L5-A43H	ESCA-C4	C1:Pan-Squamous	C5	C25: Pan-SCC (Chr 11 amp)	GI.ESCC	0
TCGA-L5-A8NI	ESCA-C1	C4:Pan-GynwithSARC	C12	C20: Mixed (Stromal/Immune)	GI.CIN	0
TCGA-LN-A4A1	ESCA-C4	C1:Pan-Squamous	C5	C25: Pan-SCC (Chr 11 amp)	GI.ESCC
TCGA-X8-AAAR	ESCA-C3	C10:M	C12	C18: Pan-GI (MSI)	GI.CIN	0
TCGA-LN-A9FO	ESCA-C2	C1:Pan-Squamous	C5	C25: Pan-SCC (Chr 11 amp)	GI.ESCC	1
TCGA-L5-A8NS	ESCA-C1	C2:Pan-GI	C12	C18: Pan-GI (MSI)	GI.HM-SNV	0
TCGA-2H-A9GH	ESCA-C1	C2:Pan-GI	C3	C18: Pan-GI (MSI)	GI.CIN
TCGA-L5-A8NT	ESCA-C1	C2:Pan-GI	C12	C18: Pan-GI (MSI)	GI.CIN	1
TCGA-LN-A4A9	ESCA-C4	C1:Pan-Squamous	C5	C10: Pan-SCC	GI.ESCC	0
TCGA-LN-A5U6	ESCA-C4	C1:Pan-Squamous	C5	C7: Mixed (Chr 9 del)	GI.ESCC	1
TCGA-IG-A4P3	ESCA-C2	C1:Pan-Squamous	C5	C25: Pan-SCC (Chr 11 amp)	GI.ESCC	0
TCGA-L5-A8NQ	ESCA-C2	C1:Pan-Squamous	C5	C25: Pan-SCC (Chr 11 amp)	GI.ESCC	1
TCGA-VR-A8EU	ESCA-C4	C1:Pan-Squamous	C10	C25: Pan-SCC (Chr 11 amp)	GI.ESCC	1
TCGA-L5-A4ON	ESCA-C3	C10:M	C3	C18: Pan-GI (MSI)	GI.CIN
TCGA-L7-A56G	ESCA-C3	C9:THYM/TGCT	C10	C25: Pan-SCC (Chr 11 amp)	GI.ESCC	1
TCGA-IG-A5B8	ESCA-C4	C1:Pan-Squamous	C10	C27: PAN-SCC (HPV)	GI.ESCC	1
TCGA-L5-A43M	ESCA-C1	C10:M	C12			1
TCGA-LN-A8I0	ESCA-C4	C1:Pan-Squamous	C5	C27: PAN-SCC (HPV)	GI.ESCC
TCGA-LN-A4A2	ESCA-C4	C1:Pan-Squamous	C5	C25: Pan-SCC (Chr 11 amp)	GI.ESCC	1
TCGA-L5-A4OX	ESCA-C3	C10:M	C3	C18: Pan-GI (MSI)	GI.CIN	0
TCGA-VR-A8EW	ESCA-C4	C1:Pan-Squamous	C10	C25: Pan-SCC (Chr 11 amp)	GI.ESCC	1
TCGA-M9-A5M8	ESCA-C3	C10:M	C3	C18: Pan-GI (MSI)	GI.CIN	0
TCGA-JY-A93E	ESCA-C1	C3:LUADwithLUSC/THCA	C12	C18: Pan-GI (MSI)	GI.CIN	1
TCGA-VR-A8ET	ESCA-C1	C2:Pan-GI	C10	C10: Pan-SCC	GI.ESCC
TCGA-L5-A4OT	ESCA-C1	C10:M	C12	C20: Mixed (Stromal/Immune)	GI.CIN	1
TCGA-L5-A4OI	ESCA-C1	C2:Pan-GI	C3	C18: Pan-GI (MSI)	GI.HM-indel	0
TCGA-LN-A49V	ESCA-C1	C5:BRCA	C14			1
TCGA-L5-A8NG	ESCA-C1	C2:Pan-GI	C12	C18: Pan-GI (MSI)	GI.CIN	0
TCGA-L5-A8NN	ESCA-C1	C11:Pan-Gyn	C6	C20: Mixed (Stromal/Immune)	GI.CIN	1
TCGA-JY-A939	ESCA-C3	C8:PRAD	C12			0
TCGA-L5-A8NF	ESCA-C3	C10:M	C3	C25: Pan-SCC (Chr 11 amp)	GI.CIN	1
TCGA-JY-A6FH	ESCA-C1	C2:Pan-GI	C3	C13: Mixed (Chr 8 del)	GI.CIN	1
TCGA-LN-A5U5	ESCA-C2	C1:Pan-Squamous	C10	C10: Pan-SCC	GI.ESCC
TCGA-R6-A8WC	ESCA-C1	C2:Pan-GI	C3	C18: Pan-GI (MSI)	GI.CIN	1
TCGA-VR-A8EQ	ESCA-C3	C10:M	C3	C18: Pan-GI (MSI)	GI.CIN	1
TCGA-VR-A8EX	ESCA-C2	C1:Pan-Squamous	C10	C25: Pan-SCC (Chr 11 amp)	GI.ESCC	0
TCGA-VR-AA7D	ESCA-C4	C1:Pan-Squamous	C10	C25: Pan-SCC (Chr 11 amp)	GI.ESCC	0
TCGA-L5-A4OJ	ESCA-C3	C10:M	C3	C18: Pan-GI (MSI)	GI.CIN	0
TCGA-L5-A4OE	ESCA-C4	C2:Pan-GI	C10	C18: Pan-GI (MSI)	GI.CIN	1
TCGA-LN-A8I1	ESCA-C4	C1:Pan-Squamous	C10	C25: Pan-SCC (Chr 11 amp)	GI.ESCC	1
TCGA-VR-A8EY	ESCA-C4	C1:Pan-Squamous	C10	C10: Pan-SCC	GI.ESCC	0
TCGA-L5-A88Y	ESCA-C3	C10:M	C3	C18: Pan-GI (MSI)	GI.CIN
TCGA-VR-AA4G	ESCA-C4	C1:Pan-Squamous	C5	C25: Pan-SCC (Chr 11 amp)	GI.ESCC
TCGA-L5-A893	ESCA-C3	C10:M	C12			1
TCGA-JY-A6FD	ESCA-C2	C1:Pan-Squamous	C10	C27: PAN-SCC (HPV)	GI.ESCC	0
TCGA-L5-A8NH	ESCA-C3	C10:M	C3	C18: Pan-GI (MSI)	GI.CIN	0
TCGA-V5-A7RE	ESCA-C3	C10:M	C3	C18: Pan-GI (MSI)	GI.CIN	1
TCGA-L5-A88S	ESCA-C4	C1:Pan-Squamous	C5	C10: Pan-SCC	GI.ESCC	0
TCGA-L5-A4OP	ESCA-C3	C10:M	C3	C4: Pan-GI (CRC)	GI.CIN	0
TCGA-JY-A6F8	ESCA-C3	C10:M	C3	C18: Pan-GI (MSI)	GI.CIN	1
TCGA-IG-A6QS	ESCA-C4	C1:Pan-Squamous	C10	C25: Pan-SCC (Chr 11 amp)	GI.ESCC	0
TCGA-VR-A8EO	ESCA-C2	C1:Pan-Squamous	C5	C25: Pan-SCC (Chr 11 amp)	GI.ESCC
TCGA-2H-A9GN	ESCA-C1	C10:M	C3	C20: Mixed (Stromal/Immune)	GI.CIN	1
TCGA-2H-A9GO	ESCA-C3	C10:M	C3	C10: Pan-SCC	GI.CIN	0
TCGA-LN-A8HZ	ESCA-C4	C1:Pan-Squamous	C10	C10: Pan-SCC	GI.ESCC	0
TCGA-L5-A4OR	ESCA-C1	C10:M	C3	C18: Pan-GI (MSI)	GI.CIN	1
TCGA-IG-A3YC	ESCA-C4	C1:Pan-Squamous	C5	C25: Pan-SCC (Chr 11 amp)	GI.ESCC	1
TCGA-L5-A4OU	ESCA-C3	C10:M	C12	C18: Pan-GI (MSI)	GI.CIN	0
TCGA-2H-A9GJ	ESCA-C3	C10:M	C3			0
TCGA-IG-A3YB	ESCA-C1	C1:Pan-Squamous	C5	C27: PAN-SCC (HPV)	GI.ESCC	1
TCGA-XP-A8T8	ESCA-C2	C1:Pan-Squamous	C10	C25: Pan-SCC (Chr 11 amp)	GI.ESCC	1
TCGA-LN-A49U	ESCA-C4	C5:BRCA	C5	C10: Pan-SCC	GI.ESCC	0
TCGA-LN-A49S	ESCA-C2	C1:Pan-Squamous	C10	C10: Pan-SCC	GI.ESCC	1
TCGA-JY-A93D	ESCA-C1	C3:LUADwithLUSC/THCA	C12	C20: Mixed (Stromal/Immune)	GI.CIN	0
TCGA-L5-A4OQ	ESCA-C1	C11:Pan-Gyn	C12	C20: Mixed (Stromal/Immune)	GI.CIN
TCGA-LN-A7HY	ESCA-C4	C5:BRCA	C5	C10: Pan-SCC	GI.ESCC	1
TCGA-VR-A8EZ	ESCA-C1	C5:BRCA	C5	C25: Pan-SCC (Chr 11 amp)	GI.ESCC	0
TCGA-LN-A49L	ESCA-C1	C1:Pan-Squamous	C5	C10: Pan-SCC	GI.ESCC	1
TCGA-V5-AASX	ESCA-C3	C10:M	C3	C18: Pan-GI (MSI)	GI.CIN	0
TCGA-LN-A49P	ESCA-C1	C1:Pan-Squamous	C5	C10: Pan-SCC	GI.ESCC	0
TCGA-LN-A4A4	ESCA-C4	C5:BRCA	C5	C10: Pan-SCC	GI.ESCC	1
TCGA-Z6-A8JD	ESCA-C4	C1:Pan-Squamous	C5	C10: Pan-SCC	GI.ESCC	0
TCGA-JY-A93C	ESCA-C1	C2:Pan-GI	C3	C18: Pan-GI (MSI)	GI.CIN	1
TCGA-LN-A7HW	ESCA-C4	C1:Pan-Squamous	C5	C7: Mixed (Chr 9 del)	GI.ESCC	1
TCGA-S8-A6BW	ESCA-C4	C1:Pan-Squamous	C5	C17: BRCA (Chr 8q amp)	GI.ESCC	1
TCGA-V5-AASV	ESCA-C2	C1:Pan-Squamous	C10	C27: PAN-SCC (HPV)	GI.ESCC	0
TCGA-LN-A7HX	ESCA-C4	C1:Pan-Squamous	C10	C25: Pan-SCC (Chr 11 amp)	GI.ESCC	1
TCGA-L5-A43E	ESCA-C3	C10:M	C3			1
TCGA-VR-AA7I	ESCA-C4	C1:Pan-Squamous	C5	C25: Pan-SCC (Chr 11 amp)	GI.ESCC
TCGA-LN-A7HV	ESCA-C2	C1:Pan-Squamous	C10	C10: Pan-SCC	GI.ESCC	0
TCGA-R6-A6L4	ESCA-C3	C10:M	C10	C4: Pan-GI (CRC)	GI.CIN	0
TCGA-2H-A9GL	ESCA-C1	C2:Pan-GI	C12	C18: Pan-GI (MSI)	GI.CIN	1
TCGA-JY-A6FB	ESCA-C3	C10:M	C3	C18: Pan-GI (MSI)	GI.CIN	0
TCGA-L5-A88T	ESCA-C3
TCGA-JY-A6FA	ESCA-C3	C10:M	C10			0
TCGA-IG-A8O2	ESCA-C2	C1:Pan-Squamous	C10	C7: Mixed (Chr 9 del)	GI.ESCC	1
TCGA-L5-A88W	ESCA-C4	C1:Pan-Squamous	C10	C27: PAN-SCC (HPV)	GI.ESCC	0
TCGA-LN-A49N	ESCA-C4	C1:Pan-Squamous	C5	C25: Pan-SCC (Chr 11 amp)	GI.ESCC	0
TCGA-XP-A8T6	ESCA-C2	C10:M	C5	C10: Pan-SCC	GI.ESCC	0
TCGA-JY-A938	ESCA-C1	C2:Pan-GI	C12	C18: Pan-GI (MSI)	GI.CIN	0

## Sheet: GBM
TCGA ID	colCluster	PanCan colCluster	PanCan mCluster	Hoadley iCluster	TCGA Subtype	High Aneuploidy
TCGA-06-5417	GBM-C3	C12:GBM/LGG(IDH1mutants)	C2		GBM_LGG.
TCGA-06-5416	GBM-C3	C7:PCPG/GBM(IDH1wt)	C2	C5: CNS/Endocrine	GBM_LGG.	0
TCGA-06-2565	GBM-C4	C12:GBM/LGG(IDH1mutants)	C2	C23: GBM/LGG (IDH1 wt)	GBM_LGG.Classic-like	0
TCGA-19-2624	GBM-C3	C12:GBM/LGG(IDH1mutants)	C2	C23: GBM/LGG (IDH1 wt)	GBM_LGG.Mesenchymal-like	0
TCGA-06-2564	GBM-C4	C12:GBM/LGG(IDH1mutants)	C2	C23: GBM/LGG (IDH1 wt)	GBM_LGG.Mesenchymal-like	0
TCGA-06-5859	GBM-C2	C12:GBM/LGG(IDH1mutants)	C2	C23: GBM/LGG (IDH1 wt)	GBM_LGG.Classic-like	0
TCGA-02-0047	GBM-C1	C7:PCPG/GBM(IDH1wt)	C2	C5: CNS/Endocrine	GBM_LGG.LGm6-GBM	0
TCGA-06-2569	GBM-C1	C11:Pan-Gyn	C7	C22: TGCT	GBM_LGG.LGm6-GBM	0
TCGA-32-4213	GBM-C1	C7:PCPG/GBM(IDH1wt)	C2	C23: GBM/LGG (IDH1 wt)	GBM_LGG.Mesenchymal-like	0
TCGA-28-5216	GBM-C3	C7:PCPG/GBM(IDH1wt)	C2	C23: GBM/LGG (IDH1 wt)	GBM_LGG.Mesenchymal-like	0
TCGA-06-0882	GBM-C3	C12:GBM/LGG(IDH1mutants)	C2	C23: GBM/LGG (IDH1 wt)	GBM_LGG.LGm6-GBM	0
TCGA-06-0743	GBM-C4	C12:GBM/LGG(IDH1mutants)	C2		GBM_LGG.	0
TCGA-41-2571	GBM-C3	C12:GBM/LGG(IDH1mutants)	C2	C23: GBM/LGG (IDH1 wt)	GBM_LGG.Mesenchymal-like	0
TCGA-19-2620	GBM-C1	C12:GBM/LGG(IDH1mutants)	C2	C23: GBM/LGG (IDH1 wt)	GBM_LGG.Classic-like	0
TCGA-27-2521	GBM-C3	C12:GBM/LGG(IDH1mutants)	C2	C7: Mixed (Chr 9 del)	GBM_LGG.G-CIMP-low	0
TCGA-06-2567	GBM-C2	C7:PCPG/GBM(IDH1wt)	C2	C23: GBM/LGG (IDH1 wt)	GBM_LGG.Mesenchymal-like	0
TCGA-06-0750	GBM-C1	C7:PCPG/GBM(IDH1wt)	C2		GBM_LGG.	0
TCGA-41-2572	GBM-C4	C12:GBM/LGG(IDH1mutants)	C2	C23: GBM/LGG (IDH1 wt)	GBM_LGG.Classic-like	0
TCGA-12-3650	GBM-C4	C12:GBM/LGG(IDH1mutants)	C2	C23: GBM/LGG (IDH1 wt)	GBM_LGG.Classic-like	0
TCGA-28-5218	GBM-C1	C4:Pan-GynwithSARC	C7	C22: TGCT	GBM_LGG.LGm6-GBM	1
TCGA-06-0744	GBM-C3	C12:GBM/LGG(IDH1mutants)	C2		GBM_LGG.	0
TCGA-06-0168	GBM-C1	C7:PCPG/GBM(IDH1wt)	C2		GBM_LGG.	0
TCGA-26-5134	GBM-C3	C12:GBM/LGG(IDH1mutants)	C2	C23: GBM/LGG (IDH1 wt)	GBM_LGG.Mesenchymal-like	0
TCGA-32-1980	GBM-C1	C7:PCPG/GBM(IDH1wt)	C2	C5: CNS/Endocrine	GBM_LGG.LGm6-GBM	0
TCGA-76-4929	GBM-C2	C12:GBM/LGG(IDH1mutants)	C2	C23: GBM/LGG (IDH1 wt)	GBM_LGG.Classic-like	1
TCGA-06-2559	GBM-C4	C12:GBM/LGG(IDH1mutants)	C2	C5: CNS/Endocrine	GBM_LGG.Mesenchymal-like	0
TCGA-12-0821	GBM-C2	C7:PCPG/GBM(IDH1wt)	C2	C23: GBM/LGG (IDH1 wt)	GBM_LGG.LGm6-GBM	0
TCGA-14-0787	GBM-C4	C7:PCPG/GBM(IDH1wt)	C2	C23: GBM/LGG (IDH1 wt)	GBM_LGG.Classic-like	0
TCGA-26-5139	GBM-C4	C7:PCPG/GBM(IDH1wt)	C2	C23: GBM/LGG (IDH1 wt)	GBM_LGG.Mesenchymal-like	0
TCGA-19-5960	GBM-C2	C12:GBM/LGG(IDH1mutants)	C2	C23: GBM/LGG (IDH1 wt)	GBM_LGG.Classic-like	0
TCGA-06-2557	GBM-C4	C12:GBM/LGG(IDH1mutants)	C2	C23: GBM/LGG (IDH1 wt)	GBM_LGG.Classic-like	0
TCGA-15-1444	GBM-C3	C12:GBM/LGG(IDH1mutants)	C2	C11: LGG (IDH1 mut)	GBM_LGG.G-CIMP-high	0
TCGA-19-2619	GBM-C3	C12:GBM/LGG(IDH1mutants)	C2	C23: GBM/LGG (IDH1 wt)	GBM_LGG.Mesenchymal-like	0
TCGA-06-5415	GBM-C4	C12:GBM/LGG(IDH1mutants)	C2	C23: GBM/LGG (IDH1 wt)	GBM_LGG.Classic-like	0
TCGA-02-2485	GBM-C2	C12:GBM/LGG(IDH1mutants)	C2	C23: GBM/LGG (IDH1 wt)	GBM_LGG.Classic-like	0
TCGA-27-1835	GBM-C4	C12:GBM/LGG(IDH1mutants)	C2	C5: CNS/Endocrine	GBM_LGG.Mesenchymal-like	0
TCGA-06-5412	GBM-C1	C7:PCPG/GBM(IDH1wt)	C2	C3: Mesenchymal (Immune)	GBM_LGG.Mesenchymal-like	0
TCGA-27-2524	GBM-C1	C7:PCPG/GBM(IDH1wt)	C2	C23: GBM/LGG (IDH1 wt)	GBM_LGG.Mesenchymal-like	0
TCGA-32-2616	GBM-C3	C7:PCPG/GBM(IDH1wt)	C2	C5: CNS/Endocrine	GBM_LGG.	0
TCGA-06-2562	GBM-C1	C7:PCPG/GBM(IDH1wt)	C2	C23: GBM/LGG (IDH1 wt)	GBM_LGG.Classic-like	0
TCGA-06-0646	GBM-C3	C12:GBM/LGG(IDH1mutants)	C2		GBM_LGG.	0
TCGA-28-2513	GBM-C1	C7:PCPG/GBM(IDH1wt)	C2	C3: Mesenchymal (Immune)	GBM_LGG.Mesenchymal-like	0
TCGA-28-5207	GBM-C2	C7:PCPG/GBM(IDH1wt)	C2	C5: CNS/Endocrine	GBM_LGG.Mesenchymal-like	0
TCGA-28-5220	GBM-C2	C8:PRAD	C2	C23: GBM/LGG (IDH1 wt)	GBM_LGG.Mesenchymal-like	0
TCGA-32-1982	GBM-C4	C12:GBM/LGG(IDH1mutants)	C2	C23: GBM/LGG (IDH1 wt)	GBM_LGG.Classic-like	0
TCGA-06-5856	GBM-C4	C7:PCPG/GBM(IDH1wt)	C2	C23: GBM/LGG (IDH1 wt)	GBM_LGG.Classic-like	0
TCGA-12-5299	GBM-C1	C7:PCPG/GBM(IDH1wt)	C2	C23: GBM/LGG (IDH1 wt)	GBM_LGG.Mesenchymal-like	0
TCGA-06-5418	GBM-C4	C7:PCPG/GBM(IDH1wt)	C2	C23: GBM/LGG (IDH1 wt)	GBM_LGG.Mesenchymal-like	0
TCGA-06-5411	GBM-C3	C7:PCPG/GBM(IDH1wt)	C2	C5: CNS/Endocrine	GBM_LGG.Mesenchymal-like	0
TCGA-06-0878	GBM-C4	C7:PCPG/GBM(IDH1wt)	C2	C23: GBM/LGG (IDH1 wt)	GBM_LGG.Mesenchymal-like	0
TCGA-41-4097	GBM-C1	C7:PCPG/GBM(IDH1wt)	C2	C3: Mesenchymal (Immune)	GBM_LGG.Classic-like	0
TCGA-06-2561	GBM-C1	C7:PCPG/GBM(IDH1wt)	C2	C23: GBM/LGG (IDH1 wt)	GBM_LGG.Mesenchymal-like	0
TCGA-76-4925	GBM-C4	C7:PCPG/GBM(IDH1wt)	C2	C23: GBM/LGG (IDH1 wt)	GBM_LGG.Classic-like	0
TCGA-27-1831	GBM-C1	C7:PCPG/GBM(IDH1wt)	C2	C23: GBM/LGG (IDH1 wt)	GBM_LGG.Mesenchymal-like	0
TCGA-06-0219	GBM-C4	C12:GBM/LGG(IDH1mutants)	C2		GBM_LGG.	0
TCGA-02-0055	GBM-C1	C4:Pan-GynwithSARC	C7	C3: Mesenchymal (Immune)	GBM_LGG.Mesenchymal-like	1
TCGA-06-5413	GBM-C1	C7:PCPG/GBM(IDH1wt)	C2	C23: GBM/LGG (IDH1 wt)	GBM_LGG.Classic-like	0
TCGA-28-2499	GBM-C4	C7:PCPG/GBM(IDH1wt)	C2		GBM_LGG.Classic-like
TCGA-06-1804	GBM-C2	C12:GBM/LGG(IDH1mutants)	C2	C23: GBM/LGG (IDH1 wt)	GBM_LGG.Classic-like	0
TCGA-27-2523	GBM-C4	C12:GBM/LGG(IDH1mutants)	C2	C23: GBM/LGG (IDH1 wt)	GBM_LGG.Classic-like	0
TCGA-14-1829	GBM-C1	C7:PCPG/GBM(IDH1wt)	C2	C23: GBM/LGG (IDH1 wt)	GBM_LGG.Mesenchymal-like	0
TCGA-06-0210	GBM-C1	C7:PCPG/GBM(IDH1wt)	C2	C23: GBM/LGG (IDH1 wt)	GBM_LGG.	0
TCGA-06-0178	GBM-C3	C12:GBM/LGG(IDH1mutants)	C2		GBM_LGG.
TCGA-76-4932	GBM-C4	C12:GBM/LGG(IDH1mutants)	C2		GBM_LGG.Classic-like
TCGA-06-0190	GBM-C1	C7:PCPG/GBM(IDH1wt)	C7	C3: Mesenchymal (Immune)	GBM_LGG.	0
TCGA-15-0742	GBM-C3	C12:GBM/LGG(IDH1mutants)	C2		GBM_LGG.	0
TCGA-32-2615	GBM-C1	C7:PCPG/GBM(IDH1wt)	C2	C23: GBM/LGG (IDH1 wt)	GBM_LGG.Mesenchymal-like	0
TCGA-27-1832	GBM-C1	C7:PCPG/GBM(IDH1wt)	C2	C23: GBM/LGG (IDH1 wt)	GBM_LGG.Mesenchymal-like	0
TCGA-14-1825	GBM-C3	C12:GBM/LGG(IDH1mutants)	C2	C23: GBM/LGG (IDH1 wt)	GBM_LGG.Mesenchymal-like	0
TCGA-06-5410	GBM-C1	C7:PCPG/GBM(IDH1wt)	C2	C3: Mesenchymal (Immune)	GBM_LGG.LGm6-GBM
TCGA-06-5408	GBM-C4	C12:GBM/LGG(IDH1mutants)	C2	C23: GBM/LGG (IDH1 wt)	GBM_LGG.Mesenchymal-like	0
TCGA-06-0138	GBM-C4	C7:PCPG/GBM(IDH1wt)	C2		GBM_LGG.
TCGA-06-0238	GBM-C3	C12:GBM/LGG(IDH1mutants)	C2		GBM_LGG.	0
TCGA-32-1970	GBM-C4	C12:GBM/LGG(IDH1mutants)	C2	C23: GBM/LGG (IDH1 wt)	GBM_LGG.Mesenchymal-like	0
TCGA-12-0618	GBM-C3	C12:GBM/LGG(IDH1mutants)	C2		GBM_LGG.	0
TCGA-06-0645	GBM-C1	C7:PCPG/GBM(IDH1wt)	C2		GBM_LGG.	0
TCGA-12-3653	GBM-C4	C12:GBM/LGG(IDH1mutants)	C2	C23: GBM/LGG (IDH1 wt)	GBM_LGG.Mesenchymal-like	1
TCGA-06-0644	GBM-C1	C4:Pan-GynwithSARC	C7		GBM_LGG.	0
TCGA-19-2629	GBM-C3	C12:GBM/LGG(IDH1mutants)	C2	C11: LGG (IDH1 mut)	GBM_LGG.G-CIMP-low	1
TCGA-19-4065	GBM-C1	C7:PCPG/GBM(IDH1wt)	C2	C23: GBM/LGG (IDH1 wt)	GBM_LGG.	0
TCGA-26-1442	GBM-C3	C12:GBM/LGG(IDH1mutants)	C2	C11: LGG (IDH1 mut)	GBM_LGG.G-CIMP-high	0
TCGA-06-0156	GBM-C3	C7:PCPG/GBM(IDH1wt)	C2		GBM_LGG.
TCGA-06-0686	GBM-C3	C12:GBM/LGG(IDH1mutants)	C2		GBM_LGG.	0
TCGA-14-0789	GBM-C1	C7:PCPG/GBM(IDH1wt)	C2	C23: GBM/LGG (IDH1 wt)	GBM_LGG.Classic-like	0
TCGA-06-0130	GBM-C1	C4:Pan-GynwithSARC	C7	C3: Mesenchymal (Immune)	GBM_LGG.Mesenchymal-like	1
TCGA-28-5204	GBM-C4	C7:PCPG/GBM(IDH1wt)	C2	C23: GBM/LGG (IDH1 wt)	GBM_LGG.Classic-like	0
TCGA-32-2632	GBM-C2	C11:Pan-Gyn	C2	C23: GBM/LGG (IDH1 wt)	GBM_LGG.Mesenchymal-like	1
TCGA-28-5208	GBM-C4	C7:PCPG/GBM(IDH1wt)	C2	C23: GBM/LGG (IDH1 wt)	GBM_LGG.Classic-like	0
TCGA-32-5222	GBM-C4	C12:GBM/LGG(IDH1mutants)	C2	C23: GBM/LGG (IDH1 wt)	GBM_LGG.Classic-like	1
TCGA-28-1753	GBM-C1	C7:PCPG/GBM(IDH1wt)	C2	C23: GBM/LGG (IDH1 wt)	GBM_LGG.Mesenchymal-like	0
TCGA-12-0616	GBM-C3	C12:GBM/LGG(IDH1mutants)	C2		GBM_LGG.	0
TCGA-19-2625	GBM-C2	C7:PCPG/GBM(IDH1wt)	C2	C3: Mesenchymal (Immune)	GBM_LGG.Mesenchymal-like	0
TCGA-06-0184	GBM-C1	C7:PCPG/GBM(IDH1wt)	C2		GBM_LGG.	0
TCGA-27-1830	GBM-C1	C7:PCPG/GBM(IDH1wt)	C2	C23: GBM/LGG (IDH1 wt)	GBM_LGG.Mesenchymal-like	0
TCGA-12-3652	GBM-C4	C12:GBM/LGG(IDH1mutants)	C2	C23: GBM/LGG (IDH1 wt)	GBM_LGG.Classic-like	0
TCGA-06-0749	GBM-C3	C12:GBM/LGG(IDH1mutants)	C2		GBM_LGG.	0
TCGA-32-2634	GBM-C3	C12:GBM/LGG(IDH1mutants)	C2	C5: CNS/Endocrine	GBM_LGG.Classic-like	0
TCGA-27-2519	GBM-C2	C7:PCPG/GBM(IDH1wt)	C2	C3: Mesenchymal (Immune)	GBM_LGG.Mesenchymal-like	0
TCGA-06-2558	GBM-C3	C7:PCPG/GBM(IDH1wt)	C2	C5: CNS/Endocrine	GBM_LGG.Mesenchymal-like	0
TCGA-28-5209	GBM-C4	C7:PCPG/GBM(IDH1wt)	C2	C23: GBM/LGG (IDH1 wt)	GBM_LGG.Classic-like	0
TCGA-06-0747	GBM-C4	C12:GBM/LGG(IDH1mutants)	C2		GBM_LGG.	0
TCGA-14-0817	GBM-C4	C12:GBM/LGG(IDH1mutants)	C2	C23: GBM/LGG (IDH1 wt)	GBM_LGG.Classic-like	0
TCGA-26-5132	GBM-C2	C7:PCPG/GBM(IDH1wt)	C2	C23: GBM/LGG (IDH1 wt)	GBM_LGG.Classic-like	0
TCGA-06-0157	GBM-C3	C12:GBM/LGG(IDH1mutants)	C2		GBM_LGG.	0
TCGA-06-2570	GBM-C3	C12:GBM/LGG(IDH1mutants)	C2	C11: LGG (IDH1 mut)	GBM_LGG.G-CIMP-low	0
TCGA-06-0158	GBM-C3	C12:GBM/LGG(IDH1mutants)	C2		GBM_LGG.	0
TCGA-06-0129	GBM-C3	C12:GBM/LGG(IDH1mutants)	C2	C11: LGG (IDH1 mut)	GBM_LGG.G-CIMP-low	0
TCGA-28-2514	GBM-C4	C12:GBM/LGG(IDH1mutants)	C2	C23: GBM/LGG (IDH1 wt)	GBM_LGG.Mesenchymal-like	0
TCGA-76-4927	GBM-C1	C7:PCPG/GBM(IDH1wt)	C2		GBM_LGG.Classic-like
TCGA-28-2509	GBM-C2	C7:PCPG/GBM(IDH1wt)	C2	C5: CNS/Endocrine	GBM_LGG.Classic-like	1
TCGA-06-5858	GBM-C2	C7:PCPG/GBM(IDH1wt)	C2	C5: CNS/Endocrine	GBM_LGG.LGm6-GBM	0
TCGA-41-3915	GBM-C1	C7:PCPG/GBM(IDH1wt)	C2	C5: CNS/Endocrine	GBM_LGG.Mesenchymal-like	0
TCGA-02-2486	GBM-C1	C7:PCPG/GBM(IDH1wt)	C2	C23: GBM/LGG (IDH1 wt)	GBM_LGG.Classic-like	0
TCGA-06-0187	GBM-C4	C7:PCPG/GBM(IDH1wt)	C2		GBM_LGG.	0
TCGA-16-0846	GBM-C3	C12:GBM/LGG(IDH1mutants)	C2	C5: CNS/Endocrine	GBM_LGG.Classic-like	1
TCGA-26-5133	GBM-C3	C12:GBM/LGG(IDH1mutants)	C2	C11: LGG (IDH1 mut)	GBM_LGG.LGm6-GBM	0
TCGA-12-5295	GBM-C4	C12:GBM/LGG(IDH1mutants)	C2	C23: GBM/LGG (IDH1 wt)	GBM_LGG.Classic-like	0
TCGA-26-5135	GBM-C3	C7:PCPG/GBM(IDH1wt)	C2	C5: CNS/Endocrine	GBM_LGG.Mesenchymal-like	0
TCGA-14-2554	GBM-C4	C7:PCPG/GBM(IDH1wt)	C2	C23: GBM/LGG (IDH1 wt)	GBM_LGG.Mesenchymal-like	0
TCGA-27-2528	GBM-C1	C7:PCPG/GBM(IDH1wt)	C2	C23: GBM/LGG (IDH1 wt)	GBM_LGG.Classic-like	0
TCGA-28-5213	GBM-C1	C7:PCPG/GBM(IDH1wt)	C2	C3: Mesenchymal (Immune)	GBM_LGG.Mesenchymal-like	0
TCGA-14-1034	GBM-C2	C7:PCPG/GBM(IDH1wt)	C2	C5: CNS/Endocrine	GBM_LGG.Classic-like	0
TCGA-32-2638	GBM-C4	C7:PCPG/GBM(IDH1wt)	C2	C23: GBM/LGG (IDH1 wt)	GBM_LGG.Classic-like	0
TCGA-06-0141	GBM-C1	C7:PCPG/GBM(IDH1wt)	C2	C3: Mesenchymal (Immune)	GBM_LGG.LGm6-GBM	0
TCGA-06-0745	GBM-C3	C7:PCPG/GBM(IDH1wt)	C2		GBM_LGG.	0
TCGA-08-0386	GBM-C2	C7:PCPG/GBM(IDH1wt)	C2		GBM_LGG.	0
TCGA-06-5414	GBM-C4	C7:PCPG/GBM(IDH1wt)	C2	C23: GBM/LGG (IDH1 wt)	GBM_LGG.Classic-like	0
TCGA-27-1834	GBM-C2	C12:GBM/LGG(IDH1mutants)	C2	C23: GBM/LGG (IDH1 wt)	GBM_LGG.Mesenchymal-like	0
TCGA-06-0174	GBM-C3	C12:GBM/LGG(IDH1mutants)	C2		GBM_LGG.	0
TCGA-12-0619	GBM-C1	C7:PCPG/GBM(IDH1wt)	C2		GBM_LGG.	0
TCGA-06-0132	GBM-C1	C7:PCPG/GBM(IDH1wt)	C2		GBM_LGG.	0
TCGA-28-5215	GBM-C1	C7:PCPG/GBM(IDH1wt)	C2	C3: Mesenchymal (Immune)	GBM_LGG.Mesenchymal-like	0
TCGA-19-1390	GBM-C3	C12:GBM/LGG(IDH1mutants)	C2	C23: GBM/LGG (IDH1 wt)	GBM_LGG.Classic-like	1
TCGA-06-2563	GBM-C4	C7:PCPG/GBM(IDH1wt)	C2	C23: GBM/LGG (IDH1 wt)	GBM_LGG.Classic-like	0
TCGA-76-4931	GBM-C3	C12:GBM/LGG(IDH1mutants)	C2	C23: GBM/LGG (IDH1 wt)	GBM_LGG.Mesenchymal-like	0
TCGA-27-1837	GBM-C4	C12:GBM/LGG(IDH1mutants)	C2	C23: GBM/LGG (IDH1 wt)	GBM_LGG.Mesenchymal-like	0
TCGA-14-1823	GBM-C1	C7:PCPG/GBM(IDH1wt)	C2	C23: GBM/LGG (IDH1 wt)	GBM_LGG.Classic-like	1
TCGA-41-5651	GBM-C3	C12:GBM/LGG(IDH1mutants)	C2	C5: CNS/Endocrine	GBM_LGG.Classic-like	0
TCGA-06-0125	GBM-C4	C7:PCPG/GBM(IDH1wt)	C2	C23: GBM/LGG (IDH1 wt)	GBM_LGG.Classic-like	0
TCGA-27-2526	GBM-C4	C12:GBM/LGG(IDH1mutants)	C2	C23: GBM/LGG (IDH1 wt)	GBM_LGG.Mesenchymal-like	0
TCGA-02-2483	GBM-C3	C7:PCPG/GBM(IDH1wt)	C2	C11: LGG (IDH1 mut)	GBM_LGG.G-CIMP-low	0

## Sheet: HNSC
	colCluster	PanCan colCluster	PanCan mCluster	Hoadley iCluster	TCGA Subtype	High Aneuploidy
TCGA-DQ-5630	HNSC-C1	C1:Pan-Squamous	C5	C27: PAN-SCC (HPV)	HNSC.Mesenchymal	0
TCGA-P3-A5Q6	HNSC-C1	C1:Pan-Squamous	C5	C10: Pan-SCC		1
TCGA-QK-AA3K	HNSC-C1	C1:Pan-Squamous	C5	C25: Pan-SCC (Chr 11 amp)		0
TCGA-MT-A7BN	HNSC-C1	C4:Pan-GynwithSARC	C5	C13: Mixed (Chr 8 del)		1
TCGA-CV-7235	HNSC-C1	C5:BRCA	C5	C25: Pan-SCC (Chr 11 amp)	HNSC.Mesenchymal	1
TCGA-P3-A5QF	HNSC-C2	C1:Pan-Squamous	C10	C27: PAN-SCC (HPV)		0
TCGA-CQ-A4CE	HNSC-C2	C1:Pan-Squamous	C10	C27: PAN-SCC (HPV)		1
TCGA-F7-A622	HNSC-C2	C1:Pan-Squamous	C10	C27: PAN-SCC (HPV)		0
TCGA-BA-A4IG	HNSC-C2	C1:Pan-Squamous	C10	C27: PAN-SCC (HPV)		0
TCGA-BB-7863	HNSC-C2	C1:Pan-Squamous	C10	C27: PAN-SCC (HPV)		0
TCGA-CV-7245	HNSC-C2	C1:Pan-Squamous	C5	C10: Pan-SCC	HNSC.Classical	1
TCGA-UF-A718	HNSC-C1	C1:Pan-Squamous	C5	C10: Pan-SCC		0
TCGA-CV-A6JZ	HNSC-C1	C1:Pan-Squamous	C5	C27: PAN-SCC (HPV)		0
TCGA-DQ-7594	HNSC-C3	C1:Pan-Squamous	C5	C20: Mixed (Stromal/Immune)		0
TCGA-BB-7862	HNSC-C1	C1:Pan-Squamous	C5	C17: BRCA (Chr 8q amp)		0
TCGA-CV-A45V	HNSC-C1	C1:Pan-Squamous	C5	C27: PAN-SCC (HPV)		0
TCGA-MT-A67A	HNSC-C2	C1:Pan-Squamous	C10	C27: PAN-SCC (HPV)		0
TCGA-D6-A6EK	HNSC-C2	C1:Pan-Squamous	C10	C27: PAN-SCC (HPV)		0
TCGA-CV-6936	HNSC-C1	C1:Pan-Squamous	C10	C25: Pan-SCC (Chr 11 amp)	HNSC.Classical	0
TCGA-BA-5151	HNSC-C1	C1:Pan-Squamous	C5	C27: PAN-SCC (HPV)	HNSC.Basal	0
TCGA-UF-A7JK	HNSC-C2	C1:Pan-Squamous	C10	C10: Pan-SCC		1
TCGA-CQ-7065	HNSC-C2	C1:Pan-Squamous	C10	C10: Pan-SCC	HNSC.Basal	0
TCGA-UP-A6WW	HNSC-C3	C1:Pan-Squamous	C5	C10: Pan-SCC		0
TCGA-CR-5249	HNSC-C3	C1:Pan-Squamous	C5	C27: PAN-SCC (HPV)	HNSC.Atypical	0
TCGA-UF-A7JV	HNSC-C2	C1:Pan-Squamous	C5	C27: PAN-SCC (HPV)		0
TCGA-CQ-5326	HNSC-C1	C1:Pan-Squamous	C5	C25: Pan-SCC (Chr 11 amp)	HNSC.Basal	0
TCGA-CV-6941	HNSC-C1	C1:Pan-Squamous	C5	C10: Pan-SCC	HNSC.Classical	1
TCGA-D6-A6EO	HNSC-C2	C1:Pan-Squamous	C10	C10: Pan-SCC		0
TCGA-BB-8601	HNSC-C2	C1:Pan-Squamous	C10	C10: Pan-SCC		1
TCGA-BA-A6DA	HNSC-C2	C1:Pan-Squamous	C10	C25: Pan-SCC (Chr 11 amp)		0
TCGA-QK-AA3J	HNSC-C2	C1:Pan-Squamous	C10	C13: Mixed (Chr 8 del)		0
TCGA-TN-A7HJ	HNSC-C2	C1:Pan-Squamous	C10	C27: PAN-SCC (HPV)		1
TCGA-IQ-A6SG	HNSC-C1	C1:Pan-Squamous	C10			1
TCGA-CN-5361	HNSC-C1	C1:Pan-Squamous	C5
TCGA-CV-7407	HNSC-C2	C1:Pan-Squamous	C10	C27: PAN-SCC (HPV)	HNSC.Atypical	1
TCGA-CV-7177	HNSC-C1	C5:BRCA	C5	C10: Pan-SCC	HNSC.Classical	0
TCGA-MZ-A5BI	HNSC-C3	C9:THYM/TGCT	C5	C27: PAN-SCC (HPV)		0
TCGA-CR-7367	HNSC-C1	C5:BRCA	C5	C10: Pan-SCC	HNSC.Mesenchymal	0
TCGA-T2-A6WZ	HNSC-C2	C1:Pan-Squamous	C10	C27: PAN-SCC (HPV)		1
TCGA-CV-7253	HNSC-C2	C1:Pan-Squamous	C10	C10: Pan-SCC	HNSC.Classical	0
TCGA-CN-5360	HNSC-C1	C1:Pan-Squamous	C5	C10: Pan-SCC	HNSC.Atypical	1
TCGA-F7-A61S	HNSC-C2	C1:Pan-Squamous	C10	C27: PAN-SCC (HPV)		0
TCGA-UF-A7JC	HNSC-C2	C1:Pan-Squamous	C10	C25: Pan-SCC (Chr 11 amp)		0
TCGA-CR-7379	HNSC-C1	C5:BRCA	C5	C10: Pan-SCC	HNSC.Basal	1
TCGA-BA-A8YP	HNSC-C1	C2:Pan-GI	C5	C10: Pan-SCC		0
TCGA-UF-A7JJ	HNSC-C1	C2:Pan-GI	C5	C20: Mixed (Stromal/Immune)		0
TCGA-BA-6873	HNSC-C2	C1:Pan-Squamous	C5	C27: PAN-SCC (HPV)	HNSC.Basal	1
TCGA-CQ-7068	HNSC-C2	C1:Pan-Squamous	C10	C27: PAN-SCC (HPV)	HNSC.Basal	0
TCGA-CV-7100	HNSC-C1	C1:Pan-Squamous	C5	C27: PAN-SCC (HPV)	HNSC.Mesenchymal	0
TCGA-BB-A5HZ	HNSC-C1	C1:Pan-Squamous	C10	C27: PAN-SCC (HPV)		0
TCGA-DQ-7589	HNSC-C1	C1:Pan-Squamous	C5	C25: Pan-SCC (Chr 11 amp)
TCGA-CR-7386	HNSC-C1	C1:Pan-Squamous	C5	C27: PAN-SCC (HPV)	HNSC.Mesenchymal	0
TCGA-D6-A6ES	HNSC-C2	C1:Pan-Squamous	C10	C25: Pan-SCC (Chr 11 amp)		0
TCGA-CN-A49B	HNSC-C1	C1:Pan-Squamous	C5	C25: Pan-SCC (Chr 11 amp)		0
TCGA-CV-A464	HNSC-C1	C1:Pan-Squamous	C5	C10: Pan-SCC		0
TCGA-CX-7086	HNSC-C2	C1:Pan-Squamous	C10	C25: Pan-SCC (Chr 11 amp)	HNSC.Atypical	1
TCGA-CN-6010	HNSC-C1	C1:Pan-Squamous	C5	C27: PAN-SCC (HPV)	HNSC.Classical	0
TCGA-P3-A6T2	HNSC-C2	C1:Pan-Squamous	C10	C27: PAN-SCC (HPV)		0
TCGA-BB-7861	HNSC-C3	C1:Pan-Squamous	C10	C27: PAN-SCC (HPV)		1
TCGA-CV-7410	HNSC-C1	C1:Pan-Squamous	C5	C20: Mixed (Stromal/Immune)	HNSC.Mesenchymal	0
TCGA-CR-7374	HNSC-C2	C10:M	C5	C10: Pan-SCC	HNSC.Atypical	0
TCGA-CV-6954	HNSC-C1	C1:Pan-Squamous	C5	C27: PAN-SCC (HPV)	HNSC.Basal	1
TCGA-CN-A63W	HNSC-C2	C1:Pan-Squamous	C10	C7: Mixed (Chr 9 del)		0
TCGA-F7-8489	HNSC-C2	C1:Pan-Squamous	C5	C27: PAN-SCC (HPV)		0
TCGA-CR-7393	HNSC-C1	C1:Pan-Squamous	C5	C20: Mixed (Stromal/Immune)	HNSC.Atypical	0
TCGA-CV-7261	HNSC-C1	C1:Pan-Squamous	C5	C10: Pan-SCC	HNSC.Classical	1
TCGA-BA-A4IH	HNSC-C3	C9:THYM/TGCT	C5	C22: TGCT		0
TCGA-CN-A6V3	HNSC-C2	C1:Pan-Squamous	C10	C10: Pan-SCC		0
TCGA-CQ-6224	HNSC-C1	C1:Pan-Squamous	C5	C10: Pan-SCC	HNSC.Mesenchymal	1
TCGA-HD-A633	HNSC-C1	C1:Pan-Squamous	C10	C10: Pan-SCC		0
TCGA-QK-A8Z8	HNSC-C2	C1:Pan-Squamous	C10	C10: Pan-SCC		0
TCGA-CN-5373	HNSC-C1	C1:Pan-Squamous	C5	C27: PAN-SCC (HPV)	HNSC.Basal	0
TCGA-D6-6824	HNSC-C1	C1:Pan-Squamous	C5	C20: Mixed (Stromal/Immune)	HNSC.Atypical	0
TCGA-CV-6952	HNSC-C2	C1:Pan-Squamous	C5	C27: PAN-SCC (HPV)	HNSC.Basal	0
TCGA-CR-7377	HNSC-C1	C1:Pan-Squamous	C5	C27: PAN-SCC (HPV)	HNSC.Mesenchymal	0
TCGA-CV-5973	HNSC-C2	C1:Pan-Squamous	C10	C25: Pan-SCC (Chr 11 amp)	HNSC.Basal	1
TCGA-BA-6870	HNSC-C2	C1:Pan-Squamous	C5	C10: Pan-SCC	HNSC.Basal	1
TCGA-CQ-6218	HNSC-C1	C1:Pan-Squamous	C5	C27: PAN-SCC (HPV)	HNSC.Basal	0
TCGA-DQ-5629	HNSC-C1	C1:Pan-Squamous	C5	C10: Pan-SCC	HNSC.Classical	1
TCGA-D6-A6EQ	HNSC-C2	C1:Pan-Squamous	C5	C10: Pan-SCC		1
TCGA-HD-A4C1	HNSC-C1	C1:Pan-Squamous	C10	C27: PAN-SCC (HPV)		0
TCGA-CN-6023	HNSC-C1	C1:Pan-Squamous	C10	C27: PAN-SCC (HPV)	HNSC.Classical	1
TCGA-CV-5976	HNSC-C2	C1:Pan-Squamous	C5	C10: Pan-SCC	HNSC.Basal	0
TCGA-CQ-5325	HNSC-C1	C1:Pan-Squamous	C5	C27: PAN-SCC (HPV)	HNSC.Mesenchymal	0
TCGA-CV-7421	HNSC-C1	C1:Pan-Squamous	C5	C10: Pan-SCC	HNSC.Classical	1
TCGA-CV-6956	HNSC-C2	C1:Pan-Squamous	C10	C27: PAN-SCC (HPV)	HNSC.Basal	0
TCGA-CV-A45O	HNSC-C1	C1:Pan-Squamous	C10	C27: PAN-SCC (HPV)		0
TCGA-CR-6493	HNSC-C2	C1:Pan-Squamous	C10	C27: PAN-SCC (HPV)	HNSC.Basal	0
TCGA-P3-A6SW	HNSC-C3	C1:Pan-Squamous	C10	C27: PAN-SCC (HPV)		0
TCGA-BA-A4IF	HNSC-C2	C1:Pan-Squamous	C5	C10: Pan-SCC		1
TCGA-CR-7402	HNSC-C3	C1:Pan-Squamous	C5	C27: PAN-SCC (HPV)	HNSC.Atypical	0
TCGA-CV-A468	HNSC-C1	C1:Pan-Squamous	C5	C20: Mixed (Stromal/Immune)
TCGA-CV-A6JT	HNSC-C1	C1:Pan-Squamous	C5	C27: PAN-SCC (HPV)		0
TCGA-BB-4225	HNSC-C3	C9:THYM/TGCT	C10	C27: PAN-SCC (HPV)	HNSC.Atypical	1
TCGA-CN-A6V1	HNSC-C3	C9:THYM/TGCT	C10	C27: PAN-SCC (HPV)		0
TCGA-BB-7870	HNSC-C2	C1:Pan-Squamous	C10	C7: Mixed (Chr 9 del)		0
TCGA-IQ-7631	HNSC-C1	C5:BRCA	C5	C10: Pan-SCC	HNSC.Mesenchymal	0
TCGA-CX-7219	HNSC-C1	C5:BRCA	C5	C10: Pan-SCC	HNSC.Mesenchymal	0
TCGA-HD-7832	HNSC-C1	C1:Pan-Squamous	C10	C27: PAN-SCC (HPV)	HNSC.Basal	0
TCGA-UF-A7JT	HNSC-C1	C1:Pan-Squamous	C5	C27: PAN-SCC (HPV)		0
TCGA-RS-A6TP	HNSC-C2	C1:Pan-Squamous	C10	C27: PAN-SCC (HPV)		0
TCGA-CV-7243	HNSC-C1	C1:Pan-Squamous	C5	C10: Pan-SCC	HNSC.Basal	1
TCGA-QK-A652	HNSC-C2	C1:Pan-Squamous	C5	C27: PAN-SCC (HPV)		0
TCGA-CN-6018	HNSC-C1	C1:Pan-Squamous	C5	C27: PAN-SCC (HPV)	HNSC.Mesenchymal	1
TCGA-CQ-A4CH	HNSC-C2	C1:Pan-Squamous	C10	C27: PAN-SCC (HPV)
TCGA-BA-A6DG	HNSC-C1	C1:Pan-Squamous	C5	C20: Mixed (Stromal/Immune)		0
TCGA-UF-A7J9	HNSC-C1	C1:Pan-Squamous	C5	C10: Pan-SCC		1
TCGA-DQ-7593	HNSC-C3	C9:THYM/TGCT	C10	C20: Mixed (Stromal/Immune)		0
TCGA-CV-7099	HNSC-C2	C1:Pan-Squamous	C10	C27: PAN-SCC (HPV)	HNSC.Basal	0
TCGA-BB-A6UO	HNSC-C1	C1:Pan-Squamous	C5	C27: PAN-SCC (HPV)		0
TCGA-CN-A49C	HNSC-C3	C1:Pan-Squamous	C10	C25: Pan-SCC (Chr 11 amp)		0
TCGA-CN-5355	HNSC-C1	C1:Pan-Squamous	C5	C27: PAN-SCC (HPV)	HNSC.Basal	0
TCGA-CV-6951	HNSC-C1	C1:Pan-Squamous	C5	C10: Pan-SCC	HNSC.Classical	1
TCGA-D6-6516	HNSC-C2	C1:Pan-Squamous	C10	C27: PAN-SCC (HPV)	HNSC.Basal	1
TCGA-CV-A45W	HNSC-C1	C1:Pan-Squamous	C5	C10: Pan-SCC		1
TCGA-HD-7831	HNSC-C1	C5:BRCA	C5	C10: Pan-SCC	HNSC.Mesenchymal	1
TCGA-BB-4227	HNSC-C2	C1:Pan-Squamous	C10	C25: Pan-SCC (Chr 11 amp)		0
TCGA-CV-6948	HNSC-C1	C1:Pan-Squamous	C5	C7: Mixed (Chr 9 del)	HNSC.Atypical	0
TCGA-CV-5970	HNSC-C1	C1:Pan-Squamous	C5	C10: Pan-SCC	HNSC.Basal	0
TCGA-WA-A7GZ	HNSC-C1	C1:Pan-Squamous	C5			1
TCGA-CR-7365	HNSC-C1	C1:Pan-Squamous	C5	C27: PAN-SCC (HPV)	HNSC.Basal	1
TCGA-CR-6481	HNSC-C3	C1:Pan-Squamous	C5	C27: PAN-SCC (HPV)	HNSC.Atypical	0
TCGA-CV-7102	HNSC-C1	C1:Pan-Squamous	C5	C25: Pan-SCC (Chr 11 amp)	HNSC.Mesenchymal	1
TCGA-CV-7411	HNSC-C1	C1:Pan-Squamous	C5	C27: PAN-SCC (HPV)	HNSC.Basal	0
TCGA-MT-A67D	HNSC-C1	C1:Pan-Squamous	C5	C25: Pan-SCC (Chr 11 amp)		0
TCGA-P3-A6T7	HNSC-C1	C1:Pan-Squamous	C10	C25: Pan-SCC (Chr 11 amp)		0
TCGA-P3-A5QE	HNSC-C3	C9:THYM/TGCT	C10	C27: PAN-SCC (HPV)		0
TCGA-IQ-A6SH	HNSC-C2	C1:Pan-Squamous	C10	C10: Pan-SCC		1
TCGA-QK-A6VC	HNSC-C1	C1:Pan-Squamous	C5	C10: Pan-SCC		1
TCGA-WA-A7H4	HNSC-C1	C1:Pan-Squamous	C5	C20: Mixed (Stromal/Immune)		0
TCGA-CR-6472	HNSC-C1	C5:BRCA	C10	C10: Pan-SCC	HNSC.Atypical	0
TCGA-F7-A50J	HNSC-C2	C1:Pan-Squamous	C5	C10: Pan-SCC		1
TCGA-F7-8298	HNSC-C2	C1:Pan-Squamous	C5	C27: PAN-SCC (HPV)		1
TCGA-BA-A6DD	HNSC-C1	C1:Pan-Squamous	C5	C27: PAN-SCC (HPV)		0
TCGA-BA-5558	HNSC-C2	C1:Pan-Squamous	C10	C27: PAN-SCC (HPV)	HNSC.Basal	0
TCGA-BA-5149	HNSC-C2	C1:Pan-Squamous	C10	C25: Pan-SCC (Chr 11 amp)	HNSC.Basal	1
TCGA-CV-7178	HNSC-C1	C5:BRCA	C5	C25: Pan-SCC (Chr 11 amp)	HNSC.Mesenchymal	1
TCGA-CR-6473	HNSC-C3	C1:Pan-Squamous	C10	C27: PAN-SCC (HPV)	HNSC.Atypical	0
TCGA-CR-6478	HNSC-C1	C1:Pan-Squamous	C5	C25: Pan-SCC (Chr 11 amp)	HNSC.Mesenchymal	1
TCGA-CR-7385	HNSC-C3	C1:Pan-Squamous	C10	C27: PAN-SCC (HPV)	HNSC.Atypical	0
TCGA-CR-7383	HNSC-C1	C1:Pan-Squamous	C5	C25: Pan-SCC (Chr 11 amp)	HNSC.Mesenchymal	1
TCGA-CV-5434	HNSC-C1	C1:Pan-Squamous	C5	C10: Pan-SCC	HNSC.Mesenchymal	1
TCGA-MT-A51W	HNSC-C2	C1:Pan-Squamous	C10	C25: Pan-SCC (Chr 11 amp)		1
TCGA-CV-7434	HNSC-C2	C1:Pan-Squamous	C10	C27: PAN-SCC (HPV)	HNSC.Basal	0
TCGA-QK-A6IJ	HNSC-C2	C1:Pan-Squamous	C10	C25: Pan-SCC (Chr 11 amp)		1
TCGA-BA-4074	HNSC-C1	C1:Pan-Squamous	C5	C25: Pan-SCC (Chr 11 amp)	HNSC.Mesenchymal	1
TCGA-CR-7364	HNSC-C2	C1:Pan-Squamous	C5	C10: Pan-SCC	HNSC.Atypical	0
TCGA-HD-7754	HNSC-C1	C5:BRCA	C5	C10: Pan-SCC	HNSC.Atypical	0
TCGA-F7-A624	HNSC-C1	C4:Pan-GynwithSARC	C10	C3: Mesenchymal (Immune)		0
TCGA-CV-7429	HNSC-C1	C1:Pan-Squamous	C5	C27: PAN-SCC (HPV)	HNSC.Mesenchymal	0
TCGA-UF-A71E	HNSC-C1	C1:Pan-Squamous	C10	C25: Pan-SCC (Chr 11 amp)		1
TCGA-T2-A6X2	HNSC-C1	C1:Pan-Squamous	C5	C27: PAN-SCC (HPV)		0
TCGA-CN-4725	HNSC-C2	C1:Pan-Squamous	C10	C27: PAN-SCC (HPV)	HNSC.Basal	1
TCGA-CN-4741	HNSC-C1	C1:Pan-Squamous	C5	C27: PAN-SCC (HPV)	HNSC.Atypical	0
TCGA-DQ-7595	HNSC-C2	C1:Pan-Squamous	C10	C10: Pan-SCC		0
TCGA-CR-7395	HNSC-C1	C1:Pan-Squamous	C5	C27: PAN-SCC (HPV)	HNSC.Basal	0
TCGA-CQ-6221	HNSC-C1
TCGA-CR-7401	HNSC-C1	C1:Pan-Squamous	C5	C27: PAN-SCC (HPV)	HNSC.Basal	0
TCGA-CV-5971	HNSC-C1	C3:LUADwithLUSC/THCA	C5	C20: Mixed (Stromal/Immune)	HNSC.Mesenchymal	0
TCGA-CV-6961	HNSC-C1	C1:Pan-Squamous	C5	C10: Pan-SCC	HNSC.Classical	0
TCGA-DQ-7590	HNSC-C3	C1:Pan-Squamous	C5	C27: PAN-SCC (HPV)		0
TCGA-CN-A6V7	HNSC-C2	C1:Pan-Squamous	C10	C27: PAN-SCC (HPV)		0
TCGA-CN-4740	HNSC-C1	C5:BRCA	C5	C10: Pan-SCC	HNSC.Mesenchymal	1
TCGA-UF-A7JH	HNSC-C1	C1:Pan-Squamous	C5	C10: Pan-SCC		1
TCGA-CR-5250	HNSC-C3	C3:LUADwithLUSC/THCA	C5	C27: PAN-SCC (HPV)	HNSC.Atypical	0
TCGA-CV-6962	HNSC-C1	C1:Pan-Squamous	C10	C27: PAN-SCC (HPV)	HNSC.Classical	1
TCGA-D6-6827	HNSC-C2	C9:THYM/TGCT	C5	C20: Mixed (Stromal/Immune)		0
TCGA-D6-A6EN	HNSC-C2	C9:THYM/TGCT	C10	C27: PAN-SCC (HPV)		0
TCGA-CN-4742	HNSC-C1	C1:Pan-Squamous	C5	C25: Pan-SCC (Chr 11 amp)	HNSC.Basal	0
TCGA-CN-4723	HNSC-C1	C1:Pan-Squamous	C5	C10: Pan-SCC	HNSC.Classical	0
TCGA-BA-6872	HNSC-C2	C1:Pan-Squamous	C5	C25: Pan-SCC (Chr 11 amp)	HNSC.Basal	1
TCGA-CV-6003	HNSC-C2	C1:Pan-Squamous	C10	C27: PAN-SCC (HPV)	HNSC.Basal	1
TCGA-CN-A49A	HNSC-C1	C1:Pan-Squamous	C5	C10: Pan-SCC		1
TCGA-CV-7409	HNSC-C2	C1:Pan-Squamous	C10	C27: PAN-SCC (HPV)		1
TCGA-CV-6436	HNSC-C2	C1:Pan-Squamous	C10	C27: PAN-SCC (HPV)	HNSC.Basal	0
TCGA-T2-A6WX	HNSC-C2	C1:Pan-Squamous	C10	C27: PAN-SCC (HPV)		0
TCGA-CV-A45Z	HNSC-C2	C1:Pan-Squamous	C5	C10: Pan-SCC		1
TCGA-CN-6012	HNSC-C1	C1:Pan-Squamous	C5	C25: Pan-SCC (Chr 11 amp)	HNSC.Atypical	1
TCGA-CR-6482	HNSC-C3	C3:LUADwithLUSC/THCA	C5	C20: Mixed (Stromal/Immune)	HNSC.Atypical	0
TCGA-CN-4734	HNSC-C1	C1:Pan-Squamous	C5
TCGA-CR-7389	HNSC-C2	C1:Pan-Squamous	C5	C10: Pan-SCC	HNSC.Atypical	1
TCGA-HD-A6I0	HNSC-C2	C1:Pan-Squamous	C10	C27: PAN-SCC (HPV)		0
TCGA-IQ-A61E	HNSC-C2	C1:Pan-Squamous	C10	C27: PAN-SCC (HPV)		0
TCGA-CQ-6225	HNSC-C2	C1:Pan-Squamous	C10	C2: BRCA (HER2 amp)	HNSC.Atypical	1
TCGA-D6-6515	HNSC-C1	C1:Pan-Squamous	C5	C27: PAN-SCC (HPV)	HNSC.Mesenchymal	0
TCGA-D6-6825	HNSC-C1	C1:Pan-Squamous	C5	C25: Pan-SCC (Chr 11 amp)	HNSC.Basal	0
TCGA-CN-6019	HNSC-C1	C5:BRCA	C5	C20: Mixed (Stromal/Immune)	HNSC.Mesenchymal	0
TCGA-QK-A8ZA	HNSC-C2	C1:Pan-Squamous	C10	C25: Pan-SCC (Chr 11 amp)		1
TCGA-P3-A6T0	HNSC-C2	C1:Pan-Squamous	C10	C10: Pan-SCC		0
TCGA-CN-A642	HNSC-C1	C1:Pan-Squamous	C10	C27: PAN-SCC (HPV)		0
TCGA-HD-8634	HNSC-C2	C1:Pan-Squamous	C10	C27: PAN-SCC (HPV)		0
TCGA-CQ-5331	HNSC-C1	C1:Pan-Squamous	C10	C27: PAN-SCC (HPV)	HNSC.Basal	0
TCGA-QK-A8Z7	HNSC-C1	C1:Pan-Squamous	C5	C10: Pan-SCC		0
TCGA-F7-A50I	HNSC-C2	C1:Pan-Squamous	C5	C27: PAN-SCC (HPV)		1
TCGA-F7-7848	HNSC-C2	C1:Pan-Squamous	C5	C25: Pan-SCC (Chr 11 amp)	HNSC.Atypical	1
TCGA-CV-5440	HNSC-C2	C1:Pan-Squamous	C5	C25: Pan-SCC (Chr 11 amp)	HNSC.Classical	1
TCGA-IQ-A61G	HNSC-C2	C1:Pan-Squamous	C10	C25: Pan-SCC (Chr 11 amp)		1
TCGA-CV-7180	HNSC-C2	C1:Pan-Squamous	C10	C27: PAN-SCC (HPV)	HNSC.Basal	0
TCGA-CV-5436	HNSC-C2	C1:Pan-Squamous	C5	C10: Pan-SCC	HNSC.Basal	1
TCGA-CQ-5323	HNSC-C1	C1:Pan-Squamous	C10	C27: PAN-SCC (HPV)	HNSC.Atypical	0
TCGA-CV-6960	HNSC-C2	C1:Pan-Squamous	C5	C10: Pan-SCC	HNSC.Classical	0
TCGA-H7-A6C4	HNSC-C2	C1:Pan-Squamous	C5	C27: PAN-SCC (HPV)		0
TCGA-CV-A45R	HNSC-C1	C1:Pan-Squamous	C5	C27: PAN-SCC (HPV)		1
TCGA-DQ-7588	HNSC-C2	C1:Pan-Squamous	C10	C25: Pan-SCC (Chr 11 amp)	HNSC.Basal	1
TCGA-CV-7415	HNSC-C1	C1:Pan-Squamous	C5	C25: Pan-SCC (Chr 11 amp)	HNSC.Mesenchymal	1
TCGA-CN-A63V	HNSC-C1	C5:BRCA	C5	C10: Pan-SCC		0
TCGA-DQ-7591	HNSC-C3	C1:Pan-Squamous	C10	C27: PAN-SCC (HPV)	HNSC.Atypical	0
TCGA-D6-8569	HNSC-C2	C1:Pan-Squamous	C5	C27: PAN-SCC (HPV)		1
TCGA-DQ-7592	HNSC-C1	C1:Pan-Squamous	C5	C10: Pan-SCC	HNSC.Basal	1
TCGA-CV-6953	HNSC-C2	C1:Pan-Squamous	C10	C27: PAN-SCC (HPV)	HNSC.Basal	0
TCGA-CV-7422	HNSC-C1	C1:Pan-Squamous	C5	C25: Pan-SCC (Chr 11 amp)	HNSC.Classical	0
TCGA-DQ-5624	HNSC-C2	C1:Pan-Squamous	C5	C10: Pan-SCC	HNSC.Basal	1
TCGA-T3-A92N	HNSC-C2	C1:Pan-Squamous	C10	C27: PAN-SCC (HPV)		1
TCGA-CV-A6K1	HNSC-C2	C1:Pan-Squamous	C10	C27: PAN-SCC (HPV)		0
TCGA-F7-A61V	HNSC-C2	C1:Pan-Squamous	C10	C27: PAN-SCC (HPV)		0
TCGA-H7-A76A	HNSC-C3	C3:LUADwithLUSC/THCA	C5	C27: PAN-SCC (HPV)		0
TCGA-CR-7382	HNSC-C1	C1:Pan-Squamous	C5	C20: Mixed (Stromal/Immune)	HNSC.Mesenchymal	0
TCGA-CN-5363	HNSC-C1	C1:Pan-Squamous	C5	C25: Pan-SCC (Chr 11 amp)	HNSC.Mesenchymal	0
TCGA-CR-6474	HNSC-C1	C1:Pan-Squamous	C5	C25: Pan-SCC (Chr 11 amp)	HNSC.Mesenchymal	1
TCGA-BA-5556	HNSC-C2	C1:Pan-Squamous	C10	C27: PAN-SCC (HPV)	HNSC.Basal	0
TCGA-CQ-A4C6	HNSC-C2	C1:Pan-Squamous	C5	C27: PAN-SCC (HPV)		0
TCGA-CQ-5333	HNSC-C2	C1:Pan-Squamous	C10	C27: PAN-SCC (HPV)		0
TCGA-CR-7372	HNSC-C1	C1:Pan-Squamous	C5	C10: Pan-SCC	HNSC.Basal	1
TCGA-KU-A6H8	HNSC-C3	C1:Pan-Squamous	C5	C20: Mixed (Stromal/Immune)		0
TCGA-BA-4075	HNSC-C2
TCGA-CQ-6220	HNSC-C2	C1:Pan-Squamous	C10	C27: PAN-SCC (HPV)	HNSC.Basal	1
TCGA-CR-6487	HNSC-C3	C3:LUADwithLUSC/THCA	C5	C27: PAN-SCC (HPV)	HNSC.Atypical	0
TCGA-CR-6492	HNSC-C2	C1:Pan-Squamous	C5	C27: PAN-SCC (HPV)	HNSC.Atypical
TCGA-BA-4078	HNSC-C1	C1:Pan-Squamous	C5	C25: Pan-SCC (Chr 11 amp)	HNSC.Classical	1
TCGA-P3-A6T4	HNSC-C2	C1:Pan-Squamous	C10	C25: Pan-SCC (Chr 11 amp)		1
TCGA-CV-A45Y	HNSC-C1	C1:Pan-Squamous	C5	C27: PAN-SCC (HPV)		0
TCGA-CR-7388	HNSC-C1	C1:Pan-Squamous	C5	C10: Pan-SCC	HNSC.Atypical	0
TCGA-UF-A719	HNSC-C2	C1:Pan-Squamous	C10	C10: Pan-SCC
TCGA-CR-7394	HNSC-C1	C1:Pan-Squamous	C5	C27: PAN-SCC (HPV)	HNSC.Basal	0
TCGA-CN-5356	HNSC-C1	C1:Pan-Squamous	C5	C10: Pan-SCC	HNSC.Mesenchymal	1
TCGA-CN-6994	HNSC-C1	C1:Pan-Squamous	C5	C25: Pan-SCC (Chr 11 amp)	HNSC.Classical	1
TCGA-BA-A6DI	HNSC-C2	C1:Pan-Squamous	C10	C27: PAN-SCC (HPV)		0
TCGA-BA-5557	HNSC-C1	C1:Pan-Squamous	C5	C27: PAN-SCC (HPV)	HNSC.Basal	0
TCGA-CQ-A4CG	HNSC-C1	C1:Pan-Squamous	C5	C27: PAN-SCC (HPV)		0
TCGA-CN-6020	HNSC-C1	C1:Pan-Squamous	C5	C10: Pan-SCC	HNSC.Basal	1
TCGA-CN-4722	HNSC-C2	C1:Pan-Squamous	C5	C14: LUAD		0
TCGA-CV-A6JU	HNSC-C2	C1:Pan-Squamous	C5	C10: Pan-SCC		0
TCGA-BB-7866	HNSC-C3	C1:Pan-Squamous	C10	C27: PAN-SCC (HPV)		0
TCGA-CR-7371	HNSC-C1	C1:Pan-Squamous	C5	C20: Mixed (Stromal/Immune)	HNSC.Atypical	0
TCGA-TN-A7HL	HNSC-C3	C9:THYM/TGCT	C10	C27: PAN-SCC (HPV)		0
TCGA-CR-6471	HNSC-C1	C1:Pan-Squamous	C5	C27: PAN-SCC (HPV)	HNSC.Basal	0
TCGA-CV-A45T	HNSC-C2	C1:Pan-Squamous	C5	C27: PAN-SCC (HPV)		0
TCGA-CN-4738	HNSC-C2	C1:Pan-Squamous	C5	C10: Pan-SCC	HNSC.Atypical	0
TCGA-UF-A7JS	HNSC-C2	C1:Pan-Squamous	C10	C25: Pan-SCC (Chr 11 amp)		0
TCGA-CV-7424	HNSC-C1	C5:BRCA	C5	C10: Pan-SCC	HNSC.Classical	1
TCGA-CV-5442	HNSC-C2	C1:Pan-Squamous	C10	C27: PAN-SCC (HPV)	HNSC.Basal	1
TCGA-HD-7229	HNSC-C2	C1:Pan-Squamous	C10	C27: PAN-SCC (HPV)	HNSC.Basal	0
TCGA-CR-7398	HNSC-C1	C1:Pan-Squamous	C5	C10: Pan-SCC	HNSC.Classical	1
TCGA-HD-8224	HNSC-C1	C3:LUADwithLUSC/THCA	C5	C10: Pan-SCC		0
TCGA-BA-5559	HNSC-C3	C3:LUADwithLUSC/THCA	C5	C27: PAN-SCC (HPV)	HNSC.Atypical	1
TCGA-CV-7423	HNSC-C2	C1:Pan-Squamous	C5	C10: Pan-SCC	HNSC.Basal	1
TCGA-CV-7183	HNSC-C1	C1:Pan-Squamous	C10	C27: PAN-SCC (HPV)	HNSC.Basal	0
TCGA-P3-A6T8	HNSC-C1	C1:Pan-Squamous	C5	C10: Pan-SCC		0
TCGA-BB-4217	HNSC-C3	C1:Pan-Squamous	C5	C25: Pan-SCC (Chr 11 amp)	HNSC.Atypical	0
TCGA-DQ-5625	HNSC-C2	C1:Pan-Squamous	C5	C27: PAN-SCC (HPV)	HNSC.Basal	1
TCGA-HD-A634	HNSC-C3	C3:LUADwithLUSC/THCA	C14	C8: UCEC		0
TCGA-CV-6950	HNSC-C2	C1:Pan-Squamous	C5	C25: Pan-SCC (Chr 11 amp)	HNSC.Mesenchymal	1
TCGA-CN-4735	HNSC-C3	C1:Pan-Squamous	C5	C25: Pan-SCC (Chr 11 amp)	HNSC.Mesenchymal	0
TCGA-CQ-5332	HNSC-C1	C1:Pan-Squamous	C5	C10: Pan-SCC	HNSC.Classical	1
TCGA-CV-6441	HNSC-C2	C1:Pan-Squamous	C10	C7: Mixed (Chr 9 del)	HNSC.Atypical	1
TCGA-P3-A6SX	HNSC-C2	C1:Pan-Squamous	C10	C25: Pan-SCC (Chr 11 amp)		0
TCGA-CR-7390	HNSC-C1	C1:Pan-Squamous	C5	C10: Pan-SCC	HNSC.Classical	1
TCGA-HD-8635	HNSC-C2	C1:Pan-Squamous	C5	C10: Pan-SCC		0
TCGA-BA-6871	HNSC-C1	C1:Pan-Squamous	C5	C25: Pan-SCC (Chr 11 amp)	HNSC.Mesenchymal	1
TCGA-CQ-7071	HNSC-C1	C1:Pan-Squamous	C5	C27: PAN-SCC (HPV)		0
TCGA-CN-6997	HNSC-C1	C1:Pan-Squamous	C5	C10: Pan-SCC	HNSC.Classical	0
TCGA-CV-5444	HNSC-C1	C1:Pan-Squamous	C5	C10: Pan-SCC	HNSC.Mesenchymal	1
TCGA-CV-6955	HNSC-C2	C1:Pan-Squamous	C10	C27: PAN-SCC (HPV)	HNSC.Atypical	0
TCGA-CR-6467	HNSC-C3	C1:Pan-Squamous	C10	C27: PAN-SCC (HPV)	HNSC.Atypical	1
TCGA-BB-A5HY	HNSC-C1	C1:Pan-Squamous	C10	C10: Pan-SCC		1
TCGA-CN-5366	HNSC-C1	C1:Pan-Squamous	C5	C27: PAN-SCC (HPV)	HNSC.Basal	1
TCGA-CQ-6228	HNSC-C1	C1:Pan-Squamous	C5	C25: Pan-SCC (Chr 11 amp)	HNSC.Classical	0
TCGA-CV-7248	HNSC-C1	C1:Pan-Squamous	C5	C10: Pan-SCC	HNSC.Atypical	1
TCGA-CV-7568	HNSC-C1	C1:Pan-Squamous	C5
TCGA-CV-7247	HNSC-C2	C1:Pan-Squamous	C5	C25: Pan-SCC (Chr 11 amp)	HNSC.Classical	1
TCGA-CV-7414	HNSC-C1	C1:Pan-Squamous	C5	C25: Pan-SCC (Chr 11 amp)	HNSC.Atypical	0
TCGA-CV-6939	HNSC-C3	C3:LUADwithLUSC/THCA	C5	C20: Mixed (Stromal/Immune)	HNSC.Atypical	0
TCGA-CN-5364	HNSC-C1	C1:Pan-Squamous	C5	C25: Pan-SCC (Chr 11 amp)	HNSC.Atypical	0
TCGA-CV-7242	HNSC-C2	C1:Pan-Squamous	C5	C10: Pan-SCC	HNSC.Atypical	0
TCGA-CV-5430	HNSC-C1	C1:Pan-Squamous	C5	C10: Pan-SCC	HNSC.Atypical	1
TCGA-CR-7391	HNSC-C1	C1:Pan-Squamous	C5	C20: Mixed (Stromal/Immune)	HNSC.Atypical
TCGA-CN-6017	HNSC-C1	C1:Pan-Squamous	C5	C20: Mixed (Stromal/Immune)	HNSC.Mesenchymal	0
TCGA-CN-5369	HNSC-C1	C1:Pan-Squamous	C5	C27: PAN-SCC (HPV)	HNSC.Basal	0
TCGA-CV-7238	HNSC-C2	C1:Pan-Squamous	C5	C27: PAN-SCC (HPV)	HNSC.Mesenchymal	0
TCGA-CR-7369	HNSC-C1	C1:Pan-Squamous	C5	C27: PAN-SCC (HPV)	HNSC.Atypical	0
TCGA-BA-A6DL	HNSC-C2	C1:Pan-Squamous	C10	C10: Pan-SCC		1
TCGA-CN-A6UY	HNSC-C3	C9:THYM/TGCT	C10	C27: PAN-SCC (HPV)		0
TCGA-CV-7432	HNSC-C2	C1:Pan-Squamous	C10	C25: Pan-SCC (Chr 11 amp)	HNSC.Basal	0
TCGA-BA-5153	HNSC-C3	C3:LUADwithLUSC/THCA	C5	C27: PAN-SCC (HPV)	HNSC.Atypical	0
TCGA-CV-6945	HNSC-C2	C1:Pan-Squamous	C5	C25: Pan-SCC (Chr 11 amp)	HNSC.Basal	1
TCGA-CV-7435	HNSC-C1	C5:BRCA	C5	C25: Pan-SCC (Chr 11 amp)	HNSC.Mesenchymal	1
TCGA-CQ-5327	HNSC-C1	C1:Pan-Squamous	C10	C27: PAN-SCC (HPV)		0
TCGA-CV-5435	HNSC-C1	C1:Pan-Squamous	C5	C10: Pan-SCC	HNSC.Classical	1
TCGA-CV-A45Q	HNSC-C2	C1:Pan-Squamous	C10	C27: PAN-SCC (HPV)		0
TCGA-UF-A7JD	HNSC-C1	C5:BRCA	C5	C10: Pan-SCC		1
TCGA-CV-7433	HNSC-C1	C5:BRCA	C5	C25: Pan-SCC (Chr 11 amp)	HNSC.Mesenchymal	1
TCGA-CN-6988	HNSC-C2	C1:Pan-Squamous	C10	C10: Pan-SCC	HNSC.Atypical	1
TCGA-F7-A623	HNSC-C1	C1:Pan-Squamous	C10	C10: Pan-SCC		1
TCGA-UF-A7JA	HNSC-C1	C1:Pan-Squamous	C5	C25: Pan-SCC (Chr 11 amp)		1
TCGA-CR-7373	HNSC-C2	C1:Pan-Squamous	C10	C27: PAN-SCC (HPV)	HNSC.Basal	1
TCGA-CR-7404	HNSC-C1	C1:Pan-Squamous	C5	C27: PAN-SCC (HPV)	HNSC.Atypical	0
TCGA-CQ-6223	HNSC-C2	C1:Pan-Squamous	C10	C27: PAN-SCC (HPV)	HNSC.Basal	0
TCGA-UF-A71A	HNSC-C1	C1:Pan-Squamous	C5	C10: Pan-SCC		1
TCGA-QK-A64Z	HNSC-C2	C1:Pan-Squamous	C10	C10: Pan-SCC		0
TCGA-CV-6934	HNSC-C1	C1:Pan-Squamous	C5	C20: Mixed (Stromal/Immune)	HNSC.Mesenchymal	0
TCGA-CV-A6JY	HNSC-C2	C1:Pan-Squamous	C10	C10: Pan-SCC		0
TCGA-HD-8314	HNSC-C1	C3:LUADwithLUSC/THCA	C5	C27: PAN-SCC (HPV)		0
TCGA-CQ-5334	HNSC-C1	C1:Pan-Squamous	C5	C27: PAN-SCC (HPV)	HNSC.Mesenchymal	0
TCGA-D6-6823	HNSC-C2	C1:Pan-Squamous	C10	C10: Pan-SCC	HNSC.Classical	1
TCGA-D6-6517	HNSC-C2	C1:Pan-Squamous	C5	C27: PAN-SCC (HPV)	HNSC.Basal	0
TCGA-CN-6024	HNSC-C1	C1:Pan-Squamous	C5	C10: Pan-SCC	HNSC.Classical	1
TCGA-CV-A460	HNSC-C3	C1:Pan-Squamous	C5	C25: Pan-SCC (Chr 11 amp)		0
TCGA-CV-5966	HNSC-C2	C1:Pan-Squamous	C10	C27: PAN-SCC (HPV)	HNSC.Mesenchymal	1
TCGA-CV-A6JN	HNSC-C2	C1:Pan-Squamous	C10	C25: Pan-SCC (Chr 11 amp)		0
TCGA-BB-A6UM	HNSC-C2	C1:Pan-Squamous	C10			0
TCGA-CN-A497	HNSC-C1	C1:Pan-Squamous	C5	C10: Pan-SCC		0
TCGA-P3-A6T3	HNSC-C2	C1:Pan-Squamous	C10	C25: Pan-SCC (Chr 11 amp)		1
TCGA-CV-7097	HNSC-C1	C1:Pan-Squamous	C5	C25: Pan-SCC (Chr 11 amp)	HNSC.Mesenchymal	0
TCGA-H7-8502	HNSC-C1	C1:Pan-Squamous	C5	C25: Pan-SCC (Chr 11 amp)		0
TCGA-D6-8568	HNSC-C2	C1:Pan-Squamous	C5	C10: Pan-SCC		0
TCGA-CV-A6JM	HNSC-C2	C1:Pan-Squamous	C10	C25: Pan-SCC (Chr 11 amp)		1
TCGA-BA-A4II	HNSC-C1	C1:Pan-Squamous	C10	C25: Pan-SCC (Chr 11 amp)		0
TCGA-IQ-A61H	HNSC-C1	C5:BRCA	C5	C25: Pan-SCC (Chr 11 amp)		0
TCGA-CV-7416	HNSC-C1	C1:Pan-Squamous	C5	C27: PAN-SCC (HPV)	HNSC.Mesenchymal	1
TCGA-F7-A620	HNSC-C2	C1:Pan-Squamous	C10	C27: PAN-SCC (HPV)		0
TCGA-BA-A6D8	HNSC-C1	C1:Pan-Squamous	C5	C10: Pan-SCC		1
TCGA-BA-A6DE	HNSC-C2	C1:Pan-Squamous	C10	C10: Pan-SCC		0
TCGA-IQ-A61I	HNSC-C3	C9:THYM/TGCT	C10	C27: PAN-SCC (HPV)		0
TCGA-CR-7368	HNSC-C2	C1:Pan-Squamous	C5	C10: Pan-SCC	HNSC.Atypical	0
TCGA-CV-6943	HNSC-C1	C1:Pan-Squamous	C5	C27: PAN-SCC (HPV)	HNSC.Mesenchymal	0
TCGA-CN-6013	HNSC-C2	C1:Pan-Squamous	C5	C25: Pan-SCC (Chr 11 amp)	HNSC.Atypical	1
TCGA-C9-A480	HNSC-C2	C1:Pan-Squamous	C10	C27: PAN-SCC (HPV)		0
TCGA-CV-6933	HNSC-C1	C1:Pan-Squamous	C5	C10: Pan-SCC	HNSC.Classical	1
TCGA-TN-A7HI	HNSC-C1	C1:Pan-Squamous	C5	C27: PAN-SCC (HPV)		1
TCGA-D6-A4Z9	HNSC-C2	C1:Pan-Squamous	C5	C25: Pan-SCC (Chr 11 amp)		0
TCGA-F7-A61W	HNSC-C2	C1:Pan-Squamous	C10	C10: Pan-SCC		0
TCGA-CV-7103	HNSC-C1	C5:BRCA	C5	C10: Pan-SCC	HNSC.Classical	0
TCGA-CR-7380	HNSC-C1	C1:Pan-Squamous	C5	C27: PAN-SCC (HPV)	HNSC.Basal	0
TCGA-P3-A5Q5	HNSC-C3	C4:Pan-GynwithSARC	C10	C27: PAN-SCC (HPV)		0
TCGA-CV-6433	HNSC-C3	C9:THYM/TGCT	C10	C27: PAN-SCC (HPV)	HNSC.Atypical	0
TCGA-CN-5370	HNSC-C1	C1:Pan-Squamous	C5	C27: PAN-SCC (HPV)	HNSC.Mesenchymal	0
TCGA-CQ-7072	HNSC-C1	C1:Pan-Squamous	C5	C10: Pan-SCC		1
TCGA-HD-A6HZ	HNSC-C1	C1:Pan-Squamous	C5	C10: Pan-SCC		1
TCGA-CN-A6V6	HNSC-C3	C1:Pan-Squamous	C10	C27: PAN-SCC (HPV)		1
TCGA-C9-A47Z	HNSC-C2	C1:Pan-Squamous	C10	C27: PAN-SCC (HPV)		1
TCGA-D6-A6EP	HNSC-C2	C11:Pan-Gyn	C7	C7: Mixed (Chr 9 del)		1
TCGA-HL-7533	HNSC-C2	C1:Pan-Squamous	C10	C27: PAN-SCC (HPV)		0
TCGA-CQ-5330	HNSC-C1	C1:Pan-Squamous	C5	C27: PAN-SCC (HPV)	HNSC.Mesenchymal	0
TCGA-CR-6470	HNSC-C3	C3:LUADwithLUSC/THCA	C5	C27: PAN-SCC (HPV)	HNSC.Atypical	0
TCGA-CQ-A4CD	HNSC-C2	C1:Pan-Squamous	C10	C27: PAN-SCC (HPV)		0
TCGA-CN-6022	HNSC-C1	C5:BRCA	C5	C10: Pan-SCC	HNSC.Mesenchymal	0
TCGA-CV-6959	HNSC-C2	C1:Pan-Squamous	C5	C27: PAN-SCC (HPV)	HNSC.Basal	1
TCGA-P3-A6T5	HNSC-C2	C1:Pan-Squamous	C5	C27: PAN-SCC (HPV)		1
TCGA-CV-6935	HNSC-C1	C1:Pan-Squamous	C5	C25: Pan-SCC (Chr 11 amp)	HNSC.Classical	0
TCGA-BA-7269	HNSC-C1	C1:Pan-Squamous	C5	C25: Pan-SCC (Chr 11 amp)	HNSC.Classical	1
TCGA-CN-A499	HNSC-C2	C1:Pan-Squamous	C10	C27: PAN-SCC (HPV)		1
TCGA-CN-5365	HNSC-C2	C1:Pan-Squamous	C10	C25: Pan-SCC (Chr 11 amp)	HNSC.Basal	0
TCGA-CV-7438	HNSC-C1	C1:Pan-Squamous	C5	C27: PAN-SCC (HPV)	HNSC.Mesenchymal	0
TCGA-CR-7392	HNSC-C1	C1:Pan-Squamous	C5	C20: Mixed (Stromal/Immune)	HNSC.Mesenchymal	0
TCGA-UF-A71B	HNSC-C1	C1:Pan-Squamous	C5	C10: Pan-SCC		0
TCGA-CV-7428	HNSC-C2	C1:Pan-Squamous	C5	C27: PAN-SCC (HPV)
TCGA-CR-7397	HNSC-C1	C5:BRCA	C5	C10: Pan-SCC	HNSC.Mesenchymal	1
TCGA-CV-7413	HNSC-C1	C1:Pan-Squamous	C5	C10: Pan-SCC	HNSC.Mesenchymal	0
TCGA-CV-A463	HNSC-C2	C1:Pan-Squamous	C10	C27: PAN-SCC (HPV)		0
TCGA-CR-7399	HNSC-C3	C1:Pan-Squamous	C5	C25: Pan-SCC (Chr 11 amp)	HNSC.Atypical	1
TCGA-RS-A6TO	HNSC-C1	C1:Pan-Squamous	C5	C27: PAN-SCC (HPV)		1
TCGA-CN-5358	HNSC-C1	C1:Pan-Squamous	C5	C20: Mixed (Stromal/Immune)	HNSC.Mesenchymal	0
TCGA-CV-7263	HNSC-C1	C1:Pan-Squamous	C5	C10: Pan-SCC	HNSC.Mesenchymal	1
TCGA-D6-6826	HNSC-C2	C1:Pan-Squamous	C5	C10: Pan-SCC	HNSC.Mesenchymal	1
TCGA-CQ-6229	HNSC-C1	C1:Pan-Squamous	C5	C27: PAN-SCC (HPV)	HNSC.Basal	1
TCGA-CQ-7069	HNSC-C2	C1:Pan-Squamous	C5	C10: Pan-SCC		0
TCGA-QK-A6IG	HNSC-C2	C1:Pan-Squamous	C5	C27: PAN-SCC (HPV)		1
TCGA-H7-8501	HNSC-C1	C1:Pan-Squamous	C10	C27: PAN-SCC (HPV)		0
TCGA-CV-5432	HNSC-C2	C1:Pan-Squamous	C5	C10: Pan-SCC	HNSC.Classical	1
TCGA-CX-A4AQ	HNSC-C3	C9:THYM/TGCT	C5	C25: Pan-SCC (Chr 11 amp)		0
TCGA-CV-A45U	HNSC-C2	C1:Pan-Squamous	C5	C25: Pan-SCC (Chr 11 amp)		1
TCGA-BA-6869	HNSC-C2	C1:Pan-Squamous	C10	C10: Pan-SCC	HNSC.Atypical	0
TCGA-CV-A6JE	HNSC-C2	C1:Pan-Squamous	C10	C25: Pan-SCC (Chr 11 amp)		0
TCGA-CN-6989	HNSC-C1	C1:Pan-Squamous	C5	C25: Pan-SCC (Chr 11 amp)	HNSC.Mesenchymal	1
TCGA-CV-A461	HNSC-C2	C1:Pan-Squamous	C5	C27: PAN-SCC (HPV)		0
TCGA-CN-4731	HNSC-C1	C1:Pan-Squamous	C5	C10: Pan-SCC	HNSC.Classical	0
TCGA-CV-A45X	HNSC-C2	C1:Pan-Squamous	C10	C25: Pan-SCC (Chr 11 amp)		1
TCGA-CN-A63U	HNSC-C2	C1:Pan-Squamous	C10	C10: Pan-SCC		1
TCGA-P3-A5QA	HNSC-C2	C1:Pan-Squamous	C5	C10: Pan-SCC		1
TCGA-CN-4726	HNSC-C1	C1:Pan-Squamous	C5	C27: PAN-SCC (HPV)	HNSC.Basal	0
TCGA-D6-A6EM	HNSC-C2	C9:THYM/TGCT	C10	C27: PAN-SCC (HPV)		1
TCGA-CV-7250	HNSC-C3	C2:Pan-GI	C10	C27: PAN-SCC (HPV)	HNSC.Atypical	0
TCGA-CV-5441	HNSC-C2	C1:Pan-Squamous	C5	C25: Pan-SCC (Chr 11 amp)	HNSC.Basal	0
TCGA-CV-5979	HNSC-C2	C1:Pan-Squamous	C10	C10: Pan-SCC	HNSC.Basal	0
TCGA-IQ-A61O	HNSC-C1	C5:BRCA	C7	C3: Mesenchymal (Immune)		1
TCGA-BB-7872	HNSC-C2	C1:Pan-Squamous	C5	C10: Pan-SCC		0
TCGA-CV-7418	HNSC-C1	C1:Pan-Squamous	C5	C25: Pan-SCC (Chr 11 amp)	HNSC.Classical	1
TCGA-CV-5439	HNSC-C2	C1:Pan-Squamous	C10	C27: PAN-SCC (HPV)	HNSC.Basal	1
TCGA-T3-A92M	HNSC-C1	C1:Pan-Squamous	C5	C17: BRCA (Chr 8q amp)		1
TCGA-BB-A5HU	HNSC-C1	C1:Pan-Squamous	C5	C10: Pan-SCC		1
TCGA-CN-4737	HNSC-C1	C1:Pan-Squamous	C5	C10: Pan-SCC	HNSC.Mesenchymal	1
TCGA-MT-A51X	HNSC-C1	C1:Pan-Squamous	C5	C27: PAN-SCC (HPV)		1
TCGA-CV-7440	HNSC-C2	C1:Pan-Squamous	C10	C10: Pan-SCC	HNSC.Classical	0
TCGA-T2-A6X0	HNSC-C1	C1:Pan-Squamous	C10	C27: PAN-SCC (HPV)		0
TCGA-CV-6937	HNSC-C1	C1:Pan-Squamous	C5	C10: Pan-SCC	HNSC.Classical	1
TCGA-BB-8596	HNSC-C1	C1:Pan-Squamous	C5	C20: Mixed (Stromal/Immune)		1
TCGA-BB-4223	HNSC-C3	C1:Pan-Squamous	C5	C27: PAN-SCC (HPV)	HNSC.Atypical	0
TCGA-CN-6992	HNSC-C1	C1:Pan-Squamous	C5	C10: Pan-SCC	HNSC.Classical	0
TCGA-CN-6016	HNSC-C1	C5:BRCA	C5	C27: PAN-SCC (HPV)	HNSC.Mesenchymal	0
TCGA-CN-4739	HNSC-C1	C1:Pan-Squamous	C5	C25: Pan-SCC (Chr 11 amp)	HNSC.Atypical	1
TCGA-CN-6998	HNSC-C2	C1:Pan-Squamous	C10	C27: PAN-SCC (HPV)	HNSC.Basal	1
TCGA-DQ-5631	HNSC-C2	C1:Pan-Squamous	C5	C10: Pan-SCC	HNSC.Mesenchymal	1
TCGA-CR-7376	HNSC-C1	C5:BRCA	C5	C20: Mixed (Stromal/Immune)	HNSC.Mesenchymal	0
TCGA-CV-A6K2	HNSC-C2	C1:Pan-Squamous	C10	C27: PAN-SCC (HPV)		0
TCGA-D6-A4ZB	HNSC-C2	C1:Pan-Squamous	C5	C10: Pan-SCC		0
TCGA-CV-6940	HNSC-C1	C1:Pan-Squamous	C5	C7: Mixed (Chr 9 del)	HNSC.Classical	1
TCGA-CR-6480	HNSC-C3	C1:Pan-Squamous	C10	C27: PAN-SCC (HPV)		0
TCGA-MT-A67F	HNSC-C2	C1:Pan-Squamous	C10	C27: PAN-SCC (HPV)		0
TCGA-BB-7864	HNSC-C1	C1:Pan-Squamous	C10	C27: PAN-SCC (HPV)		0
TCGA-CN-4728	HNSC-C1	C5:BRCA	C5	C25: Pan-SCC (Chr 11 amp)	HNSC.Mesenchymal	0
TCGA-CQ-6222	HNSC-C1	C1:Pan-Squamous	C5
TCGA-KU-A66S	HNSC-C2	C10:M	C5	C20: Mixed (Stromal/Immune)		0
TCGA-CN-4733	HNSC-C1	C1:Pan-Squamous	C5	C20: Mixed (Stromal/Immune)	HNSC.Mesenchymal	0
TCGA-H7-7774	HNSC-C2	C1:Pan-Squamous	C10	C27: PAN-SCC (HPV)	HNSC.Atypical	0
TCGA-CV-7236	HNSC-C1	C1:Pan-Squamous	C5	C10: Pan-SCC	HNSC.Mesenchymal	0
TCGA-CN-4727	HNSC-C1	C1:Pan-Squamous	C10	C27: PAN-SCC (HPV)	HNSC.Classical	1
TCGA-CN-6021	HNSC-C2	C1:Pan-Squamous	C10	C10: Pan-SCC	HNSC.Atypical	0
TCGA-CV-7104	HNSC-C1	C1:Pan-Squamous	C5	C10: Pan-SCC	HNSC.Mesenchymal	0
TCGA-QK-A6VB	HNSC-C1	C1:Pan-Squamous	C10	C10: Pan-SCC		1
TCGA-CX-7082	HNSC-C1
TCGA-IQ-7630	HNSC-C2	C1:Pan-Squamous	C10	C27: PAN-SCC (HPV)	HNSC.Basal	0
TCGA-CQ-A4CI	HNSC-C1	C1:Pan-Squamous	C5	C10: Pan-SCC		0
TCGA-CN-5367	HNSC-C2	C1:Pan-Squamous	C5	C25: Pan-SCC (Chr 11 amp)	HNSC.Basal	0
TCGA-CV-7427	HNSC-C2	C1:Pan-Squamous	C10	C27: PAN-SCC (HPV)	HNSC.Basal	0
TCGA-QK-A6IH	HNSC-C2	C1:Pan-Squamous	C10	C25: Pan-SCC (Chr 11 amp)		0
TCGA-CV-7252	HNSC-C1	C1:Pan-Squamous	C5	C27: PAN-SCC (HPV)	HNSC.Basal	0
TCGA-CQ-A4C9	HNSC-C1	C1:Pan-Squamous	C5	C10: Pan-SCC		1
TCGA-CV-5977	HNSC-C2	C1:Pan-Squamous	C10	C27: PAN-SCC (HPV)	HNSC.Basal	1
TCGA-CR-6484	HNSC-C1	C5:BRCA	C5	C27: PAN-SCC (HPV)	HNSC.Mesenchymal	1
TCGA-CN-4729	HNSC-C1	C1:Pan-Squamous	C5	C10: Pan-SCC	HNSC.Basal	1
TCGA-CV-7101	HNSC-C1	C1:Pan-Squamous	C5	C10: Pan-SCC	HNSC.Atypical	1
TCGA-QK-A8ZB	HNSC-C1	C1:Pan-Squamous	C5	C10: Pan-SCC		0
TCGA-BA-5555	HNSC-C2	C1:Pan-Squamous	C5	C10: Pan-SCC	HNSC.Atypical	1
TCGA-BA-A6DJ	HNSC-C2	C1:Pan-Squamous	C10	C27: PAN-SCC (HPV)		0
TCGA-CV-A6JD	HNSC-C2	C1:Pan-Squamous	C5	C27: PAN-SCC (HPV)		0
TCGA-CN-A63T	HNSC-C2	C1:Pan-Squamous	C5	C27: PAN-SCC (HPV)		1
TCGA-CV-7095	HNSC-C2	C1:Pan-Squamous	C10	C25: Pan-SCC (Chr 11 amp)	HNSC.Basal	0
TCGA-CV-5443	HNSC-C3	C3:LUADwithLUSC/THCA	C5	C27: PAN-SCC (HPV)	HNSC.Atypical	0
TCGA-BA-4076	HNSC-C2	C1:Pan-Squamous	C10	C25: Pan-SCC (Chr 11 amp)	HNSC.Basal	0
TCGA-CR-5243	HNSC-C3	C3:LUADwithLUSC/THCA	C5	C27: PAN-SCC (HPV)	HNSC.Atypical	0
TCGA-CN-4736	HNSC-C1	C1:Pan-Squamous	C5	C27: PAN-SCC (HPV)	HNSC.Mesenchymal	0
TCGA-CQ-6219	HNSC-C1	C1:Pan-Squamous	C5
TCGA-CV-6938	HNSC-C2	C1:Pan-Squamous	C10	C27: PAN-SCC (HPV)	HNSC.Basal	0
TCGA-CR-5247	HNSC-C1	C1:Pan-Squamous	C5	C25: Pan-SCC (Chr 11 amp)	HNSC.Classical	1
TCGA-CN-6011	HNSC-C2	C1:Pan-Squamous	C10	C25: Pan-SCC (Chr 11 amp)	HNSC.Basal	1
TCGA-CN-5359	HNSC-C1	C5:BRCA	C5	C27: PAN-SCC (HPV)	HNSC.Mesenchymal	1
TCGA-CV-7091	HNSC-C1	C1:Pan-Squamous	C5	C10: Pan-SCC	HNSC.Basal	1
TCGA-4P-AA8J	HNSC-C1	C1:Pan-Squamous	C5	C20: Mixed (Stromal/Immune)		0
TCGA-BB-7871	HNSC-C1	C5:BRCA	C5	C25: Pan-SCC (Chr 11 amp)		0
TCGA-CR-6488	HNSC-C1	C1:Pan-Squamous	C5	C10: Pan-SCC	HNSC.Mesenchymal	1
TCGA-CQ-A4CB	HNSC-C1	C1:Pan-Squamous	C5	C25: Pan-SCC (Chr 11 amp)		0
TCGA-BB-4228	HNSC-C3	C3:LUADwithLUSC/THCA	C5	C27: PAN-SCC (HPV)	HNSC.Atypical	0
TCGA-CN-A641	HNSC-C2	C1:Pan-Squamous	C10	C10: Pan-SCC		0
TCGA-UF-A71D	HNSC-C2	C1:Pan-Squamous	C10	C25: Pan-SCC (Chr 11 amp)		0
TCGA-CV-7425	HNSC-C2	C1:Pan-Squamous	C10	C27: PAN-SCC (HPV)		0
TCGA-F7-A50G	HNSC-C2	C1:Pan-Squamous	C5	C27: PAN-SCC (HPV)		0
TCGA-CV-7437	HNSC-C1	C1:Pan-Squamous	C10	C10: Pan-SCC	HNSC.Classical	1
TCGA-D6-A74Q	HNSC-C2	C1:Pan-Squamous	C5	C10: Pan-SCC		0
TCGA-MZ-A6I9	HNSC-C2	C1:Pan-Squamous	C10	C27: PAN-SCC (HPV)		0
TCGA-CN-5374	HNSC-C3	C3:LUADwithLUSC/THCA	C10	C27: PAN-SCC (HPV)	HNSC.Atypical	1
TCGA-HD-7753	HNSC-C1	C1:Pan-Squamous	C5	C25: Pan-SCC (Chr 11 amp)	HNSC.Basal	1
TCGA-P3-A6T6	HNSC-C2	C1:Pan-Squamous	C10	C27: PAN-SCC (HPV)		0
TCGA-CV-7446	HNSC-C1	C1:Pan-Squamous	C5
TCGA-CQ-A4C7	HNSC-C1
TCGA-CR-6477	HNSC-C1	C1:Pan-Squamous	C5	C25: Pan-SCC (Chr 11 amp)	HNSC.Mesenchymal	1
TCGA-CQ-6227	HNSC-C1	C1:Pan-Squamous	C5	C10: Pan-SCC	HNSC.Mesenchymal	0
TCGA-CV-7254	HNSC-C1	C5:BRCA	C5	C20: Mixed (Stromal/Immune)	HNSC.Mesenchymal	1
TCGA-CR-6491	HNSC-C2	C1:Pan-Squamous	C10	C25: Pan-SCC (Chr 11 amp)	HNSC.Basal	0
TCGA-QK-A6V9	HNSC-C3	C1:Pan-Squamous	C10	C27: PAN-SCC (HPV)		0
TCGA-CV-7255	HNSC-C2	C1:Pan-Squamous	C10	C10: Pan-SCC	HNSC.Basal	1
TCGA-CX-7085	HNSC-C1	C1:Pan-Squamous	C5	C20: Mixed (Stromal/Immune)	HNSC.Mesenchymal	0
TCGA-DQ-7596	HNSC-C3	C1:Pan-Squamous	C10	C27: PAN-SCC (HPV)		0
TCGA-IQ-7632	HNSC-C2	C1:Pan-Squamous	C10	C10: Pan-SCC	HNSC.Basal	0
TCGA-CV-A465	HNSC-C2	C1:Pan-Squamous	C10	C10: Pan-SCC		1
TCGA-CN-6995	HNSC-C1	C1:Pan-Squamous	C10	C25: Pan-SCC (Chr 11 amp)	HNSC.Basal	1
TCGA-UF-A7JO	HNSC-C1	C1:Pan-Squamous	C5	C27: PAN-SCC (HPV)		0
TCGA-CV-7089	HNSC-C2	C1:Pan-Squamous	C10	C27: PAN-SCC (HPV)	HNSC.Atypical	0
TCGA-KU-A66T	HNSC-C2	C1:Pan-Squamous	C10	C25: Pan-SCC (Chr 11 amp)		1
TCGA-CQ-7067	HNSC-C2	C1:Pan-Squamous	C5	C10: Pan-SCC		1
TCGA-KU-A6H7	HNSC-C3	C1:Pan-Squamous	C10	C27: PAN-SCC (HPV)		0
TCGA-CN-A498	HNSC-C2	C1:Pan-Squamous	C10	C25: Pan-SCC (Chr 11 amp)		0
TCGA-CQ-7063	HNSC-C2	C1:Pan-Squamous	C10	C27: PAN-SCC (HPV)		0
TCGA-CQ-5329	HNSC-C1	C1:Pan-Squamous	C5	C27: PAN-SCC (HPV)	HNSC.Mesenchymal	1
TCGA-CV-7430	HNSC-C1	C1:Pan-Squamous	C10	C7: Mixed (Chr 9 del)	HNSC.Classical	0
TCGA-BA-5152	HNSC-C1	C1:Pan-Squamous	C10	C27: PAN-SCC (HPV)	HNSC.Atypical	0
TCGA-CV-7090	HNSC-C1	C1:Pan-Squamous	C5	C27: PAN-SCC (HPV)	HNSC.Mesenchymal	1
TCGA-UF-A7JF	HNSC-C2	C1:Pan-Squamous	C10	C10: Pan-SCC		0
TCGA-MZ-A7D7	HNSC-C2	C1:Pan-Squamous	C10	C25: Pan-SCC (Chr 11 amp)		0
TCGA-HD-7917	HNSC-C2	C1:Pan-Squamous	C10	C27: PAN-SCC (HPV)		0
TCGA-CQ-5324	HNSC-C1	C1:Pan-Squamous	C5	C27: PAN-SCC (HPV)	HNSC.Classical	0
TCGA-CV-5978	HNSC-C1	C1:Pan-Squamous	C5	C10: Pan-SCC	HNSC.Classical	1
TCGA-IQ-A61J	HNSC-C1	C1:Pan-Squamous	C5	C10: Pan-SCC		0
TCGA-CN-4730	HNSC-C2	C1:Pan-Squamous	C10	C10: Pan-SCC	HNSC.Basal	1
TCGA-QK-A6II	HNSC-C2	C1:Pan-Squamous	C10	C27: PAN-SCC (HPV)		0
TCGA-CR-5248	HNSC-C3	C3:LUADwithLUSC/THCA	C10	C27: PAN-SCC (HPV)	HNSC.Atypical	0
TCGA-QK-A6IF	HNSC-C3	C9:THYM/TGCT	C5	C22: TGCT		0
TCGA-CV-A45P	HNSC-C2	C1:Pan-Squamous	C10	C27: PAN-SCC (HPV)		0
TCGA-CN-6996	HNSC-C2	C1:Pan-Squamous	C5	C27: PAN-SCC (HPV)		0
TCGA-CV-6942	HNSC-C1	C1:Pan-Squamous	C5	C27: PAN-SCC (HPV)	HNSC.Mesenchymal	0
TCGA-CV-7406	HNSC-C1	C3:LUADwithLUSC/THCA	C5	C10: Pan-SCC	HNSC.Atypical	0
TCGA-CR-7370	HNSC-C1	C1:Pan-Squamous	C5	C10: Pan-SCC	HNSC.Classical	1
TCGA-BA-A6DB	HNSC-C1	C1:Pan-Squamous	C5	C27: PAN-SCC (HPV)		0
TCGA-CV-5431	HNSC-C1	C1:Pan-Squamous	C5	C2: BRCA (HER2 amp)	HNSC.Mesenchymal	1

## Sheet: KIRC
	colCluster	PanCan colCluster	PanCan mCluster	Hoadley iCluster	TCGA Subtype	High Aneuploidy
TCGA-CZ-4865	KIRC-C1
TCGA-B8-4619	KIRC-C3	C13:THCA(BRAFmutants)	C15	C28: Pan-Kidney		0
TCGA-CZ-5986	KIRC-C2	C15:KIRC	C15	C28: Pan-Kidney	KIRC.1	0
TCGA-B0-5698	KIRC-C2	C15:KIRC	C15	C28: Pan-Kidney	KIRC.2	0
TCGA-CZ-4866	KIRC-C2	C15:KIRC	C15	C28: Pan-Kidney	KIRC.1	1
TCGA-BP-4337	KIRC-C1	C15:KIRC	C15	C28: Pan-Kidney	KIRC.2	1
TCGA-GK-A6C7	KIRC-C2	C15:KIRC	C15	C28: Pan-Kidney		0
TCGA-CZ-4860	KIRC-C1	C4:Pan-GynwithSARC	C15	C7: Mixed (Chr 9 del)		1
TCGA-CJ-4886	KIRC-C1	C15:KIRC	C15	C28: Pan-Kidney	KIRC.1	0
TCGA-DV-5567	KIRC-C3	C15:KIRC	C15	C28: Pan-Kidney	KIRC.3	0
TCGA-B0-5077	KIRC-C2	C15:KIRC	C15	C28: Pan-Kidney	KIRC.2	1
TCGA-B4-5838	KIRC-C1	C15:KIRC	C15	C28: Pan-Kidney		1
TCGA-BP-4977	KIRC-C2	C15:KIRC	C15	C28: Pan-Kidney	KIRC.1	1
TCGA-CZ-5466	KIRC-C2	C15:KIRC	C15	C28: Pan-Kidney	KIRC.	1
TCGA-CJ-5676	KIRC-C1	C15:KIRC	C15	C28: Pan-Kidney	KIRC.2	0
TCGA-CJ-4891	KIRC-C1	C15:KIRC	C15	C28: Pan-Kidney	KIRC.4	0
TCGA-A3-3359	KIRC-C2	C15:KIRC	C15		KIRC.2	0
TCGA-B4-5844	KIRC-C2	C15:KIRC	C15	C28: Pan-Kidney		0
TCGA-A3-A8OU	KIRC-C2	C15:KIRC	C15	C28: Pan-Kidney		0
TCGA-BP-5173	KIRC-C2	C15:KIRC	C15	C28: Pan-Kidney	KIRC.4	1
TCGA-MM-A84U	KIRC-C1	C15:KIRC	C15	C28: Pan-Kidney		0
TCGA-BP-4995	KIRC-C2
TCGA-CJ-4638	KIRC-C2	C15:KIRC	C15	C28: Pan-Kidney	KIRC.2	0
TCGA-BP-4968	KIRC-C2	C15:KIRC	C15	C28: Pan-Kidney	KIRC.4	0
TCGA-BP-4972	KIRC-C1	C15:KIRC	C15	C28: Pan-Kidney	KIRC.1	0
TCGA-CJ-4887	KIRC-C2	C15:KIRC	C15	C28: Pan-Kidney	KIRC.4	0
TCGA-B0-5121	KIRC-C2	C15:KIRC	C15	C28: Pan-Kidney	KIRC.2	0
TCGA-BP-4170	KIRC-C1	C15:KIRC	C15		KIRC.1	0
TCGA-B4-5843	KIRC-C1	C15:KIRC	C15	C28: Pan-Kidney		0
TCGA-BP-5175	KIRC-C1	C15:KIRC	C15	C28: Pan-Kidney	KIRC.4	1
TCGA-BP-4959	KIRC-C2	C15:KIRC	C15	C28: Pan-Kidney	KIRC.1	0
TCGA-BP-4345	KIRC-C1	C15:KIRC	C15		KIRC.3
TCGA-DV-5568	KIRC-C1
TCGA-B0-5697	KIRC-C2	C15:KIRC	C15	C28: Pan-Kidney	KIRC.4	0
TCGA-B2-5633	KIRC-C2	C15:KIRC	C15		KIRC.1	0
TCGA-CJ-4636	KIRC-C2	C15:KIRC	C15	C28: Pan-Kidney	KIRC.2	1
TCGA-G6-A8L8	KIRC-C2	C15:KIRC	C15	C28: Pan-Kidney		0
TCGA-A3-3308	KIRC-C1	C15:KIRC	C15	C28: Pan-Kidney	KIRC.3	0
TCGA-CW-5587	KIRC-C2	C15:KIRC	C15	C28: Pan-Kidney	KIRC.1	0
TCGA-BP-4973	KIRC-C2	C15:KIRC	C15	C28: Pan-Kidney	KIRC.2	0
TCGA-CJ-4903	KIRC-C2	C15:KIRC	C15	C28: Pan-Kidney	KIRC.1	0
TCGA-B8-5158	KIRC-C1	C15:KIRC	C15	C28: Pan-Kidney	KIRC.3	1
TCGA-CW-5581	KIRC-C2	C15:KIRC	C15	C28: Pan-Kidney	KIRC.1	0
TCGA-B0-5712	KIRC-C2	C15:KIRC	C15	C28: Pan-Kidney		0
TCGA-B0-4714	KIRC-C2	C15:KIRC	C15	C28: Pan-Kidney	KIRC.2	0
TCGA-BP-4774	KIRC-C2	C15:KIRC	C15		KIRC.2	0
TCGA-B8-A54I	KIRC-C1	C15:KIRC	C15	C28: Pan-Kidney		1
TCGA-BP-5001	KIRC-C2	C15:KIRC	C15	C28: Pan-Kidney	KIRC.2	0
TCGA-AK-3444	KIRC-C2	C15:KIRC	C15	C28: Pan-Kidney	KIRC.	0
TCGA-B0-4837	KIRC-C1	C15:KIRC	C15	C28: Pan-Kidney	KIRC.3	0
TCGA-BP-5194	KIRC-C2	C15:KIRC	C15	C28: Pan-Kidney	KIRC.1	0
TCGA-B8-4622	KIRC-C2	C15:KIRC	C15	C28: Pan-Kidney	KIRC.1	1
TCGA-BP-4762	KIRC-C1	C15:KIRC	C15	C28: Pan-Kidney	KIRC.3	0
TCGA-CJ-5689	KIRC-C1	C15:KIRC	C15	C28: Pan-Kidney	KIRC.3	0
TCGA-B0-4707	KIRC-C1	C15:KIRC	C15	C28: Pan-Kidney	KIRC.4	1
TCGA-CJ-5672	KIRC-C2	C15:KIRC	C15	C28: Pan-Kidney	KIRC.2	0
TCGA-B0-5094	KIRC-C2	C15:KIRC	C15	C28: Pan-Kidney	KIRC.3	1
TCGA-BP-4970	KIRC-C1	C15:KIRC	C15	C28: Pan-Kidney	KIRC.1	0
TCGA-B4-5834	KIRC-C2	C15:KIRC	C15	C28: Pan-Kidney		0
TCGA-A3-3307	KIRC-C2	C15:KIRC	C15		KIRC.1	0
TCGA-A3-3320	KIRC-C2	C15:KIRC	C15	C28: Pan-Kidney	KIRC.1	0
TCGA-CJ-5678	KIRC-C2	C15:KIRC	C15	C28: Pan-Kidney	KIRC.4	0
TCGA-B0-5104	KIRC-C2	C15:KIRC	C15	C28: Pan-Kidney	KIRC.1	0
TCGA-CZ-5470	KIRC-C2	C15:KIRC	C15	C28: Pan-Kidney	KIRC.4	0
TCGA-CZ-4859	KIRC-C2	C15:KIRC	C15	C28: Pan-Kidney	KIRC.1	0
TCGA-A3-3328	KIRC-C3	C6:LIHC	C9
TCGA-AK-3431	KIRC-C1	C15:KIRC	C15	C28: Pan-Kidney	KIRC.3	0
TCGA-B0-4703	KIRC-C1	C15:KIRC	C15	C20: Mixed (Stromal/Immune)	KIRC.3	0
TCGA-CJ-4872	KIRC-C1	C15:KIRC	C15	C28: Pan-Kidney	KIRC.3
TCGA-B0-5812	KIRC-C2	C15:KIRC	C15	C28: Pan-Kidney	KIRC.1	0
TCGA-B2-3923	KIRC-C3	C6:LIHC	C2	C9: ACC/KICH		1
TCGA-BP-4355	KIRC-C2	C15:KIRC	C15	C28: Pan-Kidney	KIRC.2	0
TCGA-B0-4843	KIRC-C1	C15:KIRC	C15	C28: Pan-Kidney	KIRC.2	0
TCGA-BP-4756	KIRC-C2	C14:KIRP	C9	C28: Pan-Kidney	KIRC.1	1
TCGA-BP-4768	KIRC-C2	C15:KIRC	C15	C28: Pan-Kidney	KIRC.2	1
TCGA-CZ-5467	KIRC-C2	C15:KIRC	C15	C28: Pan-Kidney	KIRC.1	0
TCGA-CZ-5452	KIRC-C2	C15:KIRC	C15	C28: Pan-Kidney	KIRC.4	0
TCGA-BP-4795	KIRC-C3	C15:KIRC	C15	C20: Mixed (Stromal/Immune)		0
TCGA-BP-4174	KIRC-C2	C15:KIRC	C15	C28: Pan-Kidney	KIRC.4	1
TCGA-BP-4770	KIRC-C1	C4:Pan-GynwithSARC	C7	C3: Mesenchymal (Immune)	KIRC.3	1
TCGA-A3-3323	KIRC-C1	C15:KIRC	C15	C28: Pan-Kidney	KIRC.2	0
TCGA-DV-5574	KIRC-C1	C15:KIRC	C15	C28: Pan-Kidney	KIRC.3
TCGA-CZ-5453	KIRC-C2	C15:KIRC	C15	C28: Pan-Kidney	KIRC.1	0
TCGA-BP-4967	KIRC-C2	C15:KIRC	C15	C28: Pan-Kidney	KIRC.2	1
TCGA-CJ-5683	KIRC-C2	C15:KIRC	C15	C28: Pan-Kidney	KIRC.4	0
TCGA-BP-4159	KIRC-C2	C15:KIRC	C15	C28: Pan-Kidney	KIRC.4	0
TCGA-BP-4965	KIRC-C2	C15:KIRC	C15	C28: Pan-Kidney		0
TCGA-CZ-5458	KIRC-C2	C15:KIRC	C15	C28: Pan-Kidney	KIRC.1	0
TCGA-CZ-5459	KIRC-C1	C15:KIRC	C15	C28: Pan-Kidney	KIRC.	0
TCGA-CW-5584	KIRC-C2	C15:KIRC	C15	C28: Pan-Kidney	KIRC.1	0
TCGA-B0-4701	KIRC-C2	C15:KIRC	C15	C28: Pan-Kidney	KIRC.4	0
TCGA-CJ-6031	KIRC-C1	C15:KIRC	C15	C28: Pan-Kidney	KIRC.3	0
TCGA-BP-4801	KIRC-C2	C15:KIRC	C15	C28: Pan-Kidney	KIRC.1	0
TCGA-B4-5836	KIRC-C2	C15:KIRC	C15	C28: Pan-Kidney		0
TCGA-B0-4822	KIRC-C1	C15:KIRC	C15	C28: Pan-Kidney	KIRC.	1
TCGA-A3-3335	KIRC-C2	C15:KIRC	C15			0
TCGA-B0-4815	KIRC-C1	C15:KIRC	C15	C28: Pan-Kidney	KIRC.2	1
TCGA-BP-4975	KIRC-C1	C15:KIRC	C15	C28: Pan-Kidney	KIRC.1	0
TCGA-CZ-4854	KIRC-C1	C15:KIRC	C15	C28: Pan-Kidney	KIRC.2	1
TCGA-A3-3374	KIRC-C1	C3:LUADwithLUSC/THCA	C9	C9: ACC/KICH		1
TCGA-BP-4160	KIRC-C2	C15:KIRC	C15	C28: Pan-Kidney	KIRC.4	0
TCGA-BP-4335	KIRC-C2	C15:KIRC	C15	C28: Pan-Kidney	KIRC.2	0
TCGA-CJ-4871	KIRC-C2	C15:KIRC	C15	C28: Pan-Kidney	KIRC.3	0
TCGA-BP-4177	KIRC-C3	C15:KIRC	C15	C28: Pan-Kidney		0
TCGA-A3-3357	KIRC-C2	C15:KIRC	C15	C28: Pan-Kidney	KIRC.1	0
TCGA-BP-4176	KIRC-C1	C15:KIRC	C15	C28: Pan-Kidney	KIRC.3	1
TCGA-BP-5007	KIRC-C2	C15:KIRC	C15	C28: Pan-Kidney	KIRC.1	0
TCGA-BP-4765	KIRC-C2	C15:KIRC	C15	C28: Pan-Kidney	KIRC.1	0
TCGA-A3-3322	KIRC-C2	C15:KIRC	C15	C28: Pan-Kidney	KIRC.2	0
TCGA-BP-5184	KIRC-C2	C15:KIRC	C15	C28: Pan-Kidney	KIRC.	0
TCGA-BP-4161	KIRC-C2	C15:KIRC	C15	C28: Pan-Kidney	KIRC.1	0
TCGA-BP-4782	KIRC-C2	C15:KIRC	C15	C28: Pan-Kidney	KIRC.4	0
TCGA-A3-3319	KIRC-C2	C15:KIRC	C15	C28: Pan-Kidney	KIRC.3	1
TCGA-CJ-5686	KIRC-C1	C15:KIRC	C15	C28: Pan-Kidney	KIRC.1	0
TCGA-B0-5100	KIRC-C3	C15:KIRC	C15	C28: Pan-Kidney	KIRC.3	0
TCGA-B0-5692	KIRC-C2	C15:KIRC	C15	C28: Pan-Kidney	KIRC.4	0
TCGA-B8-4148	KIRC-C2	C15:KIRC	C15	C28: Pan-Kidney	KIRC.2	0
TCGA-BP-4981	KIRC-C2	C15:KIRC	C15	C28: Pan-Kidney	KIRC.2	0
TCGA-CJ-4885	KIRC-C2	C15:KIRC	C15	C28: Pan-Kidney	KIRC.4	1
TCGA-BP-4332	KIRC-C2	C15:KIRC	C15	C28: Pan-Kidney	KIRC.1	0
TCGA-BP-4166	KIRC-C2	C15:KIRC	C15	C28: Pan-Kidney	KIRC.3	1
TCGA-BP-4327	KIRC-C2	C15:KIRC	C15	C28: Pan-Kidney	KIRC.2	0
TCGA-B0-4834	KIRC-C3	C15:KIRC	C15	C28: Pan-Kidney		0
TCGA-B0-5110	KIRC-C2	C15:KIRC	C15	C28: Pan-Kidney	KIRC.1	0
TCGA-BP-4766	KIRC-C2	C15:KIRC	C15	C28: Pan-Kidney	KIRC.1	0
TCGA-B0-5117	KIRC-C3	C6:LIHC	C15	C9: ACC/KICH		1
TCGA-AK-3447	KIRC-C3	C15:KIRC	C9	C9: ACC/KICH		1
TCGA-MW-A4EC	KIRC-C2	C15:KIRC	C15	C28: Pan-Kidney		0
TCGA-CW-5588	KIRC-C1	C15:KIRC	C15	C28: Pan-Kidney	KIRC.	1
TCGA-BP-4162	KIRC-C2	C15:KIRC	C15	C28: Pan-Kidney	KIRC.1	1
TCGA-CZ-5457	KIRC-C2	C15:KIRC	C15	C28: Pan-Kidney	KIRC.4	1
TCGA-B0-4838	KIRC-C2	C15:KIRC	C15	C28: Pan-Kidney	KIRC.1	1
TCGA-A3-3343	KIRC-C2	C15:KIRC	C15		KIRC.1	0
TCGA-B4-5832	KIRC-C1	C15:KIRC	C15	C28: Pan-Kidney		1
TCGA-CZ-5984	KIRC-C2	C15:KIRC	C15	C28: Pan-Kidney	KIRC.4	1
TCGA-B8-5550	KIRC-C1	C15:KIRC	C15	C28: Pan-Kidney	KIRC.3	1
TCGA-CJ-5677	KIRC-C1	C4:Pan-GynwithSARC	C15	C28: Pan-Kidney	KIRC.4	0
TCGA-B4-5377	KIRC-C2	C15:KIRC	C15	C28: Pan-Kidney	KIRC.1	0
TCGA-AK-3453	KIRC-C3	C14:KIRP	C9	C28: Pan-Kidney		1
TCGA-A3-3362	KIRC-C2	C15:KIRC	C15	C28: Pan-Kidney	KIRC.1
TCGA-CJ-6027	KIRC-C1	C15:KIRC	C15	C28: Pan-Kidney	KIRC.3	1
TCGA-B0-4819	KIRC-C1	C15:KIRC	C15	C20: Mixed (Stromal/Immune)	KIRC.2	0
TCGA-EU-5907	KIRC-C2	C15:KIRC	C15	C28: Pan-Kidney	KIRC.	1
TCGA-AK-3451	KIRC-C2	C15:KIRC	C15	C28: Pan-Kidney	KIRC.4	0
TCGA-G6-A8L6	KIRC-C2	C15:KIRC	C15	C28: Pan-Kidney		0
TCGA-BP-4325	KIRC-C2	C15:KIRC	C15	C28: Pan-Kidney	KIRC.1	0
TCGA-CZ-4864	KIRC-C2	C15:KIRC	C15	C28: Pan-Kidney		0
TCGA-CJ-6030	KIRC-C1	C15:KIRC	C15	C28: Pan-Kidney	KIRC.3	0
TCGA-CZ-5985	KIRC-C2	C15:KIRC	C15	C28: Pan-Kidney	KIRC.1	0
TCGA-BP-4964	KIRC-C1	C15:KIRC	C15		KIRC.1	0
TCGA-BP-4987	KIRC-C2	C15:KIRC	C15	C28: Pan-Kidney	KIRC.1	0
TCGA-BP-4352	KIRC-C1	C4:Pan-GynwithSARC	C15	C17: BRCA (Chr 8q amp)	KIRC.2	1
TCGA-AK-3434	KIRC-C2	C15:KIRC	C15	C28: Pan-Kidney	KIRC.4	0
TCGA-CJ-4889	KIRC-C2	C15:KIRC	C15	C28: Pan-Kidney	KIRC.3
TCGA-B8-5163	KIRC-C1	C15:KIRC	C15	C28: Pan-Kidney	KIRC.3	1
TCGA-B0-5106	KIRC-C1	C15:KIRC	C15	C28: Pan-Kidney	KIRC.2	0
TCGA-B2-5639	KIRC-C2	C15:KIRC	C15	C28: Pan-Kidney		0
TCGA-BP-4986	KIRC-C1
TCGA-BP-5177	KIRC-C2	C15:KIRC	C15	C28: Pan-Kidney	KIRC.3	0
TCGA-B0-4814	KIRC-C2	C15:KIRC	C15	C28: Pan-Kidney	KIRC.4	0
TCGA-CJ-4644	KIRC-C2	C15:KIRC	C15	C28: Pan-Kidney	KIRC.4	0
TCGA-B8-5165	KIRC-C2	C15:KIRC	C15	C28: Pan-Kidney	KIRC.1	0
TCGA-BP-5000	KIRC-C2	C15:KIRC	C15	C28: Pan-Kidney	KIRC.2	1
TCGA-CZ-5988	KIRC-C1	C15:KIRC	C15	C28: Pan-Kidney	KIRC.3	0
TCGA-B0-5075	KIRC-C2	C15:KIRC	C15	C28: Pan-Kidney	KIRC.1	0
TCGA-B0-4817	KIRC-C1	C15:KIRC	C15	C28: Pan-Kidney	KIRC.4	0
TCGA-B0-5400	KIRC-C1	C15:KIRC	C15	C28: Pan-Kidney	KIRC.4	0
TCGA-B0-4697	KIRC-C1	C4:Pan-GynwithSARC	C15	C20: Mixed (Stromal/Immune)	KIRC.2
TCGA-BP-5199	KIRC-C1
TCGA-CJ-4892	KIRC-C2	C15:KIRC	C15	C28: Pan-Kidney	KIRC.4	0
TCGA-B2-A4SR	KIRC-C2	C15:KIRC	C15	C28: Pan-Kidney		0
TCGA-CZ-5987	KIRC-C2	C15:KIRC	C15	C28: Pan-Kidney	KIRC.4	1
TCGA-A3-3382	KIRC-C2	C15:KIRC	C15	C28: Pan-Kidney	KIRC.3	1
TCGA-B0-4813	KIRC-C1	C15:KIRC	C15	C28: Pan-Kidney	KIRC.2	0
TCGA-B0-4833	KIRC-C2	C15:KIRC	C15	C28: Pan-Kidney	KIRC.2	0
TCGA-CJ-5680	KIRC-C2	C15:KIRC	C15	C28: Pan-Kidney	KIRC.4	0
TCGA-CZ-5456	KIRC-C1	C15:KIRC	C15	C28: Pan-Kidney	KIRC.	1
TCGA-B0-5691	KIRC-C2	C15:KIRC	C15	C28: Pan-Kidney	KIRC.1	0
TCGA-MM-A564	KIRC-C2	C15:KIRC	C15	C28: Pan-Kidney		1
TCGA-B8-A54G	KIRC-C2	C14:KIRP	C15	C28: Pan-Kidney		0
TCGA-B0-5096	KIRC-C1	C3:LUADwithLUSC/THCA	C15	C28: Pan-Kidney	KIRC.3	0
TCGA-CZ-5460	KIRC-C2	C15:KIRC	C15	C28: Pan-Kidney	KIRC.4	0
TCGA-B0-4849	KIRC-C2	C15:KIRC	C15	C28: Pan-Kidney	KIRC.2	0
TCGA-CZ-4857	KIRC-C1	C15:KIRC	C15	C28: Pan-Kidney	KIRC.3	1
TCGA-BP-5178	KIRC-C1	C15:KIRC	C15	C28: Pan-Kidney	KIRC.4	1
TCGA-BP-4777	KIRC-C2	C15:KIRC	C15	C28: Pan-Kidney	KIRC.4	0
TCGA-B4-5378	KIRC-C3	C15:KIRC	C15	C28: Pan-Kidney		0
TCGA-B0-5098	KIRC-C3	C14:KIRP	C9	C10: Pan-SCC		0
TCGA-BP-4340	KIRC-C2	C15:KIRC	C15	C28: Pan-Kidney	KIRC.1	0
TCGA-B0-4691	KIRC-C1	C15:KIRC	C15	C28: Pan-Kidney	KIRC.4	0
TCGA-CJ-4897	KIRC-C2	C15:KIRC	C15	C28: Pan-Kidney	KIRC.1	1
TCGA-AK-3445	KIRC-C1	C4:Pan-GynwithSARC	C15	C28: Pan-Kidney	KIRC.3	1
TCGA-B0-5706	KIRC-C2	C15:KIRC	C15	C28: Pan-Kidney	KIRC.2
TCGA-A3-3346	KIRC-C1	C15:KIRC	C15	C28: Pan-Kidney	KIRC.	1
TCGA-B2-4099	KIRC-C2	C15:KIRC	C15	C28: Pan-Kidney	KIRC.4	0
TCGA-BP-5201	KIRC-C2	C15:KIRC	C15	C28: Pan-Kidney	KIRC.4	1
TCGA-BP-5196	KIRC-C1	C3:LUADwithLUSC/THCA	C15	C28: Pan-Kidney	KIRC.3	1
TCGA-B8-A54D	KIRC-C2	C15:KIRC	C15	C28: Pan-Kidney		0
TCGA-A3-3347	KIRC-C1	C15:KIRC	C15	C28: Pan-Kidney	KIRC.3	1
TCGA-BP-5010	KIRC-C1	C15:KIRC	C15	C28: Pan-Kidney	KIRC.2	0
TCGA-3Z-A93Z	KIRC-C2	C15:KIRC	C15	C28: Pan-Kidney		1
TCGA-BP-4775	KIRC-C2	C15:KIRC	C15	C28: Pan-Kidney	KIRC.1	1
TCGA-BP-4974	KIRC-C2	C15:KIRC	C15	C28: Pan-Kidney	KIRC.2	0
TCGA-G6-A5PC	KIRC-C2	C15:KIRC	C15	C28: Pan-Kidney		0
TCGA-CJ-4874	KIRC-C2	C15:KIRC	C15		KIRC.1	0
TCGA-A3-3380	KIRC-C2	C15:KIRC	C15	C28: Pan-Kidney	KIRC.1	1
TCGA-BP-4158	KIRC-C2	C15:KIRC	C15	C28: Pan-Kidney	KIRC.2	0
TCGA-CJ-4908	KIRC-C1	C15:KIRC	C15	C28: Pan-Kidney	KIRC.1	0
TCGA-BP-4790	KIRC-C1	C15:KIRC	C15	C28: Pan-Kidney	KIRC.1	0
TCGA-B0-5084	KIRC-C1	C15:KIRC	C9	C22: TGCT		1
TCGA-BP-5176	KIRC-C2	C15:KIRC	C15	C28: Pan-Kidney	KIRC.4	0
TCGA-DV-5575	KIRC-C2	C15:KIRC	C15	C28: Pan-Kidney	KIRC.1	0
TCGA-BP-4338	KIRC-C1	C15:KIRC	C15	C28: Pan-Kidney	KIRC.4
TCGA-BP-5168	KIRC-C2	C15:KIRC	C15	C28: Pan-Kidney	KIRC.1	0
TCGA-CJ-6032	KIRC-C2	C15:KIRC	C15	C28: Pan-Kidney	KIRC.1	0
TCGA-BP-5181	KIRC-C2
TCGA-CJ-4875	KIRC-C2	C15:KIRC	C15	C28: Pan-Kidney	KIRC.2	1
TCGA-B0-4712	KIRC-C1	C15:KIRC	C15	C28: Pan-Kidney	KIRC.4	1
TCGA-A3-3331	KIRC-C2	C15:KIRC	C15	C28: Pan-Kidney	KIRC.1	0
TCGA-B0-4810	KIRC-C1	C15:KIRC	C15	C28: Pan-Kidney	KIRC.3	0
TCGA-B0-5083	KIRC-C1	C3:LUADwithLUSC/THCA	C15
TCGA-BP-5170	KIRC-C1	C15:KIRC	C15	C28: Pan-Kidney	KIRC.4	0
TCGA-A3-A8OX	KIRC-C2	C15:KIRC	C15	C28: Pan-Kidney		0
TCGA-B0-5099	KIRC-C2	C15:KIRC	C15	C28: Pan-Kidney	KIRC.1	0
TCGA-CZ-5465	KIRC-C2	C15:KIRC	C15	C28: Pan-Kidney	KIRC.1	1
TCGA-BP-5195	KIRC-C1	C15:KIRC	C15	C28: Pan-Kidney	KIRC.3	0
TCGA-B0-5088	KIRC-C1	C15:KIRC	C15	C28: Pan-Kidney	KIRC.2	0
TCGA-CZ-4861	KIRC-C1	C15:KIRC	C15	C28: Pan-Kidney	KIRC.3	0
TCGA-BP-4991	KIRC-C2	C15:KIRC	C15	C28: Pan-Kidney	KIRC.1	0
TCGA-A3-3387	KIRC-C2	C15:KIRC	C15	C28: Pan-Kidney	KIRC.3	0
TCGA-B0-5115	KIRC-C2	C15:KIRC	C15	C28: Pan-Kidney	KIRC.1	0
TCGA-CW-5580	KIRC-C2	C15:KIRC	C15	C28: Pan-Kidney	KIRC.1	0
TCGA-EU-5906	KIRC-C2	C15:KIRC	C15	C28: Pan-Kidney	KIRC.	0
TCGA-CW-6090	KIRC-C1	C15:KIRC	C15	C28: Pan-Kidney	KIRC.3	1
TCGA-B0-4824	KIRC-C2	C15:KIRC	C15	C28: Pan-Kidney	KIRC.2	0
TCGA-B0-4945	KIRC-C2	C15:KIRC	C15	C28: Pan-Kidney	KIRC.1	0
TCGA-BP-4787	KIRC-C1	C3:LUADwithLUSC/THCA	C15	C28: Pan-Kidney	KIRC.3	1
TCGA-BP-4976	KIRC-C2
TCGA-CJ-6028	KIRC-C1	C15:KIRC	C15	C28: Pan-Kidney	KIRC.3	1
TCGA-B8-A54H	KIRC-C2	C15:KIRC	C15	C28: Pan-Kidney		0
TCGA-B0-5709	KIRC-C1	C15:KIRC	C15	C28: Pan-Kidney	KIRC.3	0
TCGA-DV-A4VX	KIRC-C2	C14:KIRP	C9	C28: Pan-Kidney		1
TCGA-BP-4789	KIRC-C2	C15:KIRC	C15	C28: Pan-Kidney	KIRC.1	0
TCGA-AK-3443	KIRC-C3	C6:LIHC	C9	C9: ACC/KICH		0
TCGA-BP-4758	KIRC-C2	C15:KIRC	C15	C28: Pan-Kidney	KIRC.4	0
TCGA-BP-4165	KIRC-C2	C15:KIRC	C15	C28: Pan-Kidney	KIRC.2	0
TCGA-B0-4698	KIRC-C3	C1:Pan-Squamous	C10	C3: Mesenchymal (Immune)		1
TCGA-BP-4351	KIRC-C2	C15:KIRC	C15	C28: Pan-Kidney	KIRC.2	1
TCGA-CJ-4869	KIRC-C1	C15:KIRC	C15	C28: Pan-Kidney		0
TCGA-EU-5905	KIRC-C1	C15:KIRC	C15	C28: Pan-Kidney	KIRC.	1
TCGA-CJ-5682	KIRC-C2	C15:KIRC	C15	C28: Pan-Kidney	KIRC.2	1
TCGA-AK-3465	KIRC-C3	C15:KIRC	C15	C9: ACC/KICH		1
TCGA-BP-4804	KIRC-C1	C15:KIRC	C15	C28: Pan-Kidney	KIRC.3
TCGA-BP-4760	KIRC-C3	C15:KIRC	C15	C28: Pan-Kidney		0
TCGA-CJ-4882	KIRC-C1	C15:KIRC	C15	C20: Mixed (Stromal/Immune)	KIRC.2	0
TCGA-BP-4353	KIRC-C1
TCGA-B0-5705	KIRC-C2	C15:KIRC	C15	C28: Pan-Kidney	KIRC.1	0
TCGA-CW-5590	KIRC-C1	C15:KIRC	C15		KIRC.1
TCGA-A3-3306	KIRC-C2	C15:KIRC	C15			1
TCGA-B8-5546	KIRC-C2	C14:KIRP	C9	C28: Pan-Kidney	KIRC.1	0
TCGA-BP-4330	KIRC-C2	C15:KIRC	C15	C28: Pan-Kidney	KIRC.2	0
TCGA-A3-3367	KIRC-C2	C15:KIRC	C15	C28: Pan-Kidney	KIRC.1	0
TCGA-BP-4173	KIRC-C2	C15:KIRC	C15	C28: Pan-Kidney	KIRC.3
TCGA-CJ-4643	KIRC-C2	C15:KIRC	C15	C28: Pan-Kidney	KIRC.1	0
TCGA-AK-3427	KIRC-C3	C15:KIRC	C9	C28: Pan-Kidney		0
TCGA-BP-4963	KIRC-C2	C15:KIRC	C15	C28: Pan-Kidney	KIRC.2	1
TCGA-CZ-5455	KIRC-C2	C15:KIRC	C15	C28: Pan-Kidney	KIRC.1	0
TCGA-B0-4848	KIRC-C1	C15:KIRC	C15	C28: Pan-Kidney	KIRC.4	0
TCGA-B0-4700	KIRC-C1	C15:KIRC	C15	C20: Mixed (Stromal/Immune)	KIRC.3	0
TCGA-BP-4784	KIRC-C1	C15:KIRC	C15
TCGA-B8-A54K	KIRC-C3
TCGA-A3-3365	KIRC-C2	C15:KIRC	C15	C28: Pan-Kidney	KIRC.1
TCGA-A3-3311	KIRC-C1	C15:KIRC	C15	C28: Pan-Kidney	KIRC.1	0
TCGA-CZ-5982	KIRC-C2	C15:KIRC	C15	C28: Pan-Kidney	KIRC.1	0
TCGA-BP-4759	KIRC-C2	C15:KIRC	C15	C28: Pan-Kidney	KIRC.4
TCGA-BP-4342	KIRC-C1
TCGA-B8-5164	KIRC-C2	C15:KIRC	C15	C28: Pan-Kidney	KIRC.1	0
TCGA-BP-5183	KIRC-C2	C15:KIRC	C15	C28: Pan-Kidney	KIRC.1	0
TCGA-B8-5162	KIRC-C1	C15:KIRC	C15	C28: Pan-Kidney		0
TCGA-BP-4988	KIRC-C1
TCGA-BP-5182	KIRC-C1	C15:KIRC	C15	C28: Pan-Kidney	KIRC.3	0
TCGA-B0-4823	KIRC-C2	C15:KIRC	C15	C28: Pan-Kidney	KIRC.1	0
TCGA-BP-5174	KIRC-C2	C15:KIRC	C15	C28: Pan-Kidney	KIRC.4	0
TCGA-BP-4769	KIRC-C3	C13:THCA(BRAFmutants)	C15	C28: Pan-Kidney
TCGA-BP-4334	KIRC-C3	C3:LUADwithLUSC/THCA	C9	C9: ACC/KICH		1
TCGA-AK-3440	KIRC-C3	C6:LIHC	C9	C9: ACC/KICH		1
TCGA-T7-A92I	KIRC-C3	C14:KIRP	C9	C28: Pan-Kidney		0
TCGA-B8-A54J	KIRC-C2	C15:KIRC	C15	C28: Pan-Kidney		0
TCGA-B8-4154	KIRC-C2	C15:KIRC	C15	C28: Pan-Kidney	KIRC.4	0
TCGA-BP-4960	KIRC-C1	C15:KIRC	C15	C28: Pan-Kidney	KIRC.2	1
TCGA-CZ-5468	KIRC-C1	C7:PCPG/GBM(IDH1wt)	C15	C28: Pan-Kidney	KIRC.3	1
TCGA-CJ-5684	KIRC-C2	C15:KIRC	C15	C28: Pan-Kidney	KIRC.1	0
TCGA-BP-4761	KIRC-C1	C15:KIRC	C15	C28: Pan-Kidney	KIRC.4	1
TCGA-B0-4818	KIRC-C2	C15:KIRC	C15	C28: Pan-Kidney	KIRC.1	0
TCGA-DV-5565	KIRC-C2	C15:KIRC	C15	C28: Pan-Kidney	KIRC.3	1
TCGA-BP-4326	KIRC-C2	C15:KIRC	C15	C28: Pan-Kidney	KIRC.3	0
TCGA-B0-5402	KIRC-C1	C15:KIRC	C15	C28: Pan-Kidney	KIRC.1	0
TCGA-B0-5703	KIRC-C2	C15:KIRC	C15	C28: Pan-Kidney	KIRC.2	0
TCGA-B0-5690	KIRC-C2	C15:KIRC	C15	C28: Pan-Kidney	KIRC.1	0
TCGA-BP-5004	KIRC-C2	C15:KIRC	C15	C28: Pan-Kidney	KIRC.1	0
TCGA-B0-5108	KIRC-C1	C15:KIRC	C15	C28: Pan-Kidney	KIRC.3	0
TCGA-CW-5585	KIRC-C2	C15:KIRC	C15	C28: Pan-Kidney	KIRC.1	0
TCGA-CZ-4853	KIRC-C2	C15:KIRC	C15	C28: Pan-Kidney	KIRC.1	0
TCGA-CJ-4876	KIRC-C2	C15:KIRC	C15	C28: Pan-Kidney	KIRC.4	1
TCGA-CJ-4901	KIRC-C1	C15:KIRC	C15	C28: Pan-Kidney	KIRC.3	1
TCGA-A3-A6NI	KIRC-C2	C15:KIRC	C15	C28: Pan-Kidney		0
TCGA-B0-4821	KIRC-C1	C15:KIRC	C15	C28: Pan-Kidney		1
TCGA-B8-4620	KIRC-C1	C15:KIRC	C15	C28: Pan-Kidney	KIRC.3	1
TCGA-B0-5696	KIRC-C2	C15:KIRC	C15	C28: Pan-Kidney	KIRC.4	0
TCGA-BP-4993	KIRC-C2	C15:KIRC	C15	C28: Pan-Kidney	KIRC.1	0
TCGA-AS-3777	KIRC-C3	C6:LIHC	C6	C28: Pan-Kidney		1
TCGA-CW-6087	KIRC-C3	C3:LUADwithLUSC/THCA	C9	C28: Pan-Kidney	KIRC.3
TCGA-B2-5641	KIRC-C2	C15:KIRC	C15	C28: Pan-Kidney	KIRC.1	0
TCGA-B0-4842	KIRC-C1	C15:KIRC	C15	C28: Pan-Kidney	KIRC.4	0
TCGA-BP-4344	KIRC-C2
TCGA-A3-3378	KIRC-C2	C15:KIRC	C15	C28: Pan-Kidney	KIRC.2	0
TCGA-A3-3313	KIRC-C3	C15:KIRC	C15	C28: Pan-Kidney		1
TCGA-CJ-4888	KIRC-C1	C15:KIRC	C15	C28: Pan-Kidney	KIRC.3
TCGA-CJ-4890	KIRC-C1	C15:KIRC	C15	C20: Mixed (Stromal/Immune)	KIRC.3
TCGA-B0-4693	KIRC-C2	C15:KIRC	C15	C28: Pan-Kidney	KIRC.1	0
TCGA-B0-5700	KIRC-C2	C15:KIRC	C15		KIRC.
TCGA-DV-A4W0	KIRC-C2	C15:KIRC	C15	C28: Pan-Kidney		0
TCGA-CJ-5675	KIRC-C2	C15:KIRC	C15	C28: Pan-Kidney	KIRC.4	0
TCGA-B0-5119	KIRC-C2	C15:KIRC	C15	C28: Pan-Kidney	KIRC.1	0
TCGA-CJ-4895	KIRC-C1	C15:KIRC	C15	C28: Pan-Kidney	KIRC.3	0
TCGA-B8-5159	KIRC-C2	C15:KIRC	C15	C28: Pan-Kidney	KIRC.1	0
TCGA-BP-4983	KIRC-C1	C4:Pan-GynwithSARC	C15	C28: Pan-Kidney	KIRC.3	0
TCGA-B0-4718	KIRC-C2	C15:KIRC	C15	C28: Pan-Kidney	KIRC.2	0
TCGA-A3-A8OV	KIRC-C2	C15:KIRC	C15	C28: Pan-Kidney		0
TCGA-B0-5085	KIRC-C2	C15:KIRC	C15	C28: Pan-Kidney	KIRC.2	0
TCGA-B8-5553	KIRC-C2	C15:KIRC	C15	C28: Pan-Kidney	KIRC.1	0
TCGA-EU-5904	KIRC-C2	C15:KIRC	C15	C28: Pan-Kidney	KIRC.	0
TCGA-B0-5695	KIRC-C2	C15:KIRC	C15	C28: Pan-Kidney	KIRC.1	0
TCGA-BP-5008	KIRC-C2	C15:KIRC	C15	C28: Pan-Kidney	KIRC.1	0
TCGA-B0-4839	KIRC-C2	C15:KIRC	C15	C28: Pan-Kidney	KIRC.4	1
TCGA-BP-4803	KIRC-C1	C15:KIRC	C15	C28: Pan-Kidney	KIRC.3	0
TCGA-BP-4354	KIRC-C1	C4:Pan-GynwithSARC	C15	C28: Pan-Kidney	KIRC.3	0
TCGA-BP-5192	KIRC-C2	C15:KIRC	C15	C28: Pan-Kidney	KIRC.1	0
TCGA-B0-5107	KIRC-C3	C14:KIRP	C9	C28: Pan-Kidney	KIRC.4	0
TCGA-B8-4143	KIRC-C1	C15:KIRC	C15	C28: Pan-Kidney	KIRC.3	1
TCGA-CJ-4639	KIRC-C2	C15:KIRC	C15	C28: Pan-Kidney	KIRC.1	0
TCGA-BP-5200	KIRC-C1	C15:KIRC	C15	C28: Pan-Kidney	KIRC.1	1
TCGA-CJ-4918	KIRC-C1	C15:KIRC	C15	C28: Pan-Kidney	KIRC.3	0
TCGA-B2-4098	KIRC-C3	C14:KIRP	C9	C28: Pan-Kidney	KIRC.2	0
TCGA-B0-5109	KIRC-C3	C3:LUADwithLUSC/THCA	C15	C20: Mixed (Stromal/Immune)	KIRC.3	1
TCGA-CJ-4907	KIRC-C1	C15:KIRC	C15	C28: Pan-Kidney	KIRC.1	0
TCGA-B0-5701	KIRC-C1	C15:KIRC	C15	C28: Pan-Kidney	KIRC.4	0
TCGA-B0-5702	KIRC-C3	C15:KIRC	C15	C28: Pan-Kidney	KIRC.
TCGA-CZ-5469	KIRC-C1	C15:KIRC	C15	C28: Pan-Kidney	KIRC.4	1
TCGA-CZ-5454	KIRC-C2	C15:KIRC	C15	C28: Pan-Kidney	KIRC.3	0
TCGA-BP-4781	KIRC-C1	C15:KIRC	C15	C28: Pan-Kidney	KIRC.3
TCGA-A3-A8CQ	KIRC-C2	C15:KIRC	C15	C28: Pan-Kidney		0
TCGA-BP-4343	KIRC-C1	C15:KIRC	C15	C28: Pan-Kidney	KIRC.3	1
TCGA-B0-5116	KIRC-C1	C15:KIRC	C15	C28: Pan-Kidney	KIRC.4	1
TCGA-CZ-5461	KIRC-C2	C15:KIRC	C15	C28: Pan-Kidney	KIRC.1	1
TCGA-BP-4771	KIRC-C1	C15:KIRC	C15	C28: Pan-Kidney	KIRC.2
TCGA-AK-3436	KIRC-C1	C15:KIRC	C15	C28: Pan-Kidney	KIRC.4	1
TCGA-AK-3456	KIRC-C3	C14:KIRP	C9	C28: Pan-Kidney	KIRC.1	0
TCGA-B0-5711	KIRC-C2	C15:KIRC	C15	C28: Pan-Kidney	KIRC.1	0
TCGA-B8-4151	KIRC-C2	C15:KIRC	C15	C28: Pan-Kidney	KIRC.4	0
TCGA-B0-4696	KIRC-C1	C4:Pan-GynwithSARC	C7	C3: Mesenchymal (Immune)		1
TCGA-B0-4845	KIRC-C2	C15:KIRC	C15	C28: Pan-Kidney	KIRC.2	1
TCGA-B8-4621	KIRC-C3	C14:KIRP	C9	C28: Pan-Kidney	KIRC.4	1
TCGA-BP-5186	KIRC-C2	C15:KIRC	C15	C28: Pan-Kidney	KIRC.	0
TCGA-CJ-4893	KIRC-C2	C15:KIRC	C15	C28: Pan-Kidney	KIRC.1	0
TCGA-CZ-5462	KIRC-C2	C15:KIRC	C15	C28: Pan-Kidney	KIRC.4	0
TCGA-B0-4713	KIRC-C1	C15:KIRC	C15	C28: Pan-Kidney	KIRC.4	0
TCGA-CJ-6033	KIRC-C1	C15:KIRC	C15	C28: Pan-Kidney	KIRC.3	0
TCGA-CZ-5451	KIRC-C2	C15:KIRC	C15	C28: Pan-Kidney	KIRC.	0
TCGA-B0-4688	KIRC-C3	C5:BRCA	C7	C3: Mesenchymal (Immune)		1
TCGA-BP-4776	KIRC-C2	C15:KIRC	C15	C28: Pan-Kidney	KIRC.	0
TCGA-A3-3349	KIRC-C1	C15:KIRC	C15	C28: Pan-Kidney	KIRC.3
TCGA-A3-A8OW	KIRC-C2	C15:KIRC	C15	C28: Pan-Kidney		0
TCGA-B0-5092	KIRC-C1	C15:KIRC	C15	C28: Pan-Kidney	KIRC.2	0
TCGA-BP-5185	KIRC-C2	C15:KIRC	C15	C28: Pan-Kidney	KIRC.	1
TCGA-A3-3383	KIRC-C2	C15:KIRC	C15	C28: Pan-Kidney	KIRC.	0
TCGA-DV-5573	KIRC-C2
TCGA-CJ-4640	KIRC-C2	C15:KIRC	C15	C28: Pan-Kidney	KIRC.4	1
TCGA-CJ-5681	KIRC-C2	C15:KIRC	C9	C28: Pan-Kidney	KIRC.1	0
TCGA-CJ-4902	KIRC-C1	C15:KIRC	C15	C28: Pan-Kidney	KIRC.3	0
TCGA-A3-A6NJ	KIRC-C2	C15:KIRC	C15	C28: Pan-Kidney		0
TCGA-AK-3458	KIRC-C2	C15:KIRC	C15	C28: Pan-Kidney	KIRC.4	1
TCGA-B0-5113	KIRC-C2	C15:KIRC	C15	C28: Pan-Kidney	KIRC.1	1
TCGA-BP-5190	KIRC-C2	C15:KIRC	C15	C28: Pan-Kidney	KIRC.2	0
TCGA-BP-4994	KIRC-C2	C15:KIRC	C15	C28: Pan-Kidney		1
TCGA-A3-3325	KIRC-C2	C15:KIRC	C15		KIRC.1	1
TCGA-B2-4102	KIRC-C2	C15:KIRC	C15	C28: Pan-Kidney	KIRC.1	0
TCGA-BP-5009	KIRC-C2
TCGA-BP-4962	KIRC-C1	C15:KIRC	C15	C28: Pan-Kidney	KIRC.4	0
TCGA-A3-3351	KIRC-C2	C15:KIRC	C15	C28: Pan-Kidney	KIRC.2	0
TCGA-BP-4969	KIRC-C2	C15:KIRC	C15	C28: Pan-Kidney	KIRC.2	1
TCGA-B0-4811	KIRC-C2	C15:KIRC	C15	C28: Pan-Kidney	KIRC.2	1
TCGA-BP-4164	KIRC-C2	C15:KIRC	C15	C28: Pan-Kidney	KIRC.1	1
TCGA-BP-4998	KIRC-C1	C15:KIRC	C15	C28: Pan-Kidney	KIRC.2	0
TCGA-BP-4331	KIRC-C2
TCGA-BP-4798	KIRC-C1	C15:KIRC	C15	C28: Pan-Kidney	KIRC.2	1
TCGA-B0-5713	KIRC-C2	C15:KIRC	C15	C28: Pan-Kidney	KIRC.1	0
TCGA-CJ-4900	KIRC-C1	C15:KIRC	C15	C28: Pan-Kidney		0
TCGA-CW-6097	KIRC-C1	C15:KIRC	C15	C28: Pan-Kidney		0
TCGA-AK-3433	KIRC-C3	C15:KIRC	C9	C9: ACC/KICH		1
TCGA-B0-5120	KIRC-C1	C15:KIRC	C15	C28: Pan-Kidney	KIRC.3	0
TCGA-A3-3373	KIRC-C2	C15:KIRC	C15	C28: Pan-Kidney	KIRC.1	0
TCGA-A3-3376	KIRC-C2	C15:KIRC	C15	C28: Pan-Kidney	KIRC.	0
TCGA-BP-4961	KIRC-C1	C15:KIRC	C15	C28: Pan-Kidney	KIRC.1	0
TCGA-B0-5399	KIRC-C2	C15:KIRC	C15	C28: Pan-Kidney	KIRC.4
TCGA-BP-4989	KIRC-C2	C15:KIRC	C15	C28: Pan-Kidney	KIRC.2	1
TCGA-B0-5081	KIRC-C1	C15:KIRC	C15	C28: Pan-Kidney	KIRC.2	0
TCGA-CW-6088	KIRC-C2	C15:KIRC	C15	C28: Pan-Kidney	KIRC.1	0
TCGA-CW-6093	KIRC-C2	C15:KIRC	C15	C28: Pan-Kidney	KIRC.1	0
TCGA-CJ-4634	KIRC-C2	C15:KIRC	C15	C28: Pan-Kidney	KIRC.1	0
TCGA-CZ-4863	KIRC-C2	C15:KIRC	C15	C28: Pan-Kidney	KIRC.1	0
TCGA-CJ-4868	KIRC-C1	C15:KIRC	C15		KIRC.3	0
TCGA-B2-4101	KIRC-C2	C15:KIRC	C15	C28: Pan-Kidney	KIRC.2	0
TCGA-BP-4807	KIRC-C1	C15:KIRC	C15	C28: Pan-Kidney	KIRC.1	0
TCGA-DV-A4VZ	KIRC-C3	C13:THCA(BRAFmutants)	C15	C28: Pan-Kidney		0
TCGA-BP-4999	KIRC-C2	C15:KIRC	C15		KIRC.1	0
TCGA-A3-3316	KIRC-C1	C15:KIRC	C15	C28: Pan-Kidney	KIRC.3	1
TCGA-CJ-4923	KIRC-C1	C15:KIRC	C15	C28: Pan-Kidney	KIRC.4	0
TCGA-BP-5187	KIRC-C2	C15:KIRC	C15	C28: Pan-Kidney	KIRC.2	0
TCGA-B0-4710	KIRC-C1	C15:KIRC	C15	C28: Pan-Kidney	KIRC.	1
TCGA-DV-5576	KIRC-C3	C15:KIRC	C15	C28: Pan-Kidney	KIRC.3	0
TCGA-BP-4163	KIRC-C2	C15:KIRC	C15	C28: Pan-Kidney	KIRC.4	0
TCGA-B0-5097	KIRC-C1	C15:KIRC	C15	C28: Pan-Kidney	KIRC.3	0
TCGA-B0-5102	KIRC-C2	C15:KIRC	C15	C28: Pan-Kidney	KIRC.4	1
TCGA-AK-3460	KIRC-C2	C15:KIRC	C15	C28: Pan-Kidney	KIRC.1	0
TCGA-B2-5635	KIRC-C2	C15:KIRC	C15		KIRC.2	0
TCGA-B0-5080	KIRC-C1	C15:KIRC	C15	C20: Mixed (Stromal/Immune)	KIRC.3	0
TCGA-CJ-4641	KIRC-C1	C15:KIRC	C15	C28: Pan-Kidney	KIRC.4
TCGA-DV-5569	KIRC-C2	C15:KIRC	C15	C28: Pan-Kidney	KIRC.1	0
TCGA-B0-4690	KIRC-C1	C3:LUADwithLUSC/THCA	C15	C28: Pan-Kidney	KIRC.3	1
TCGA-B8-A54F	KIRC-C1	C15:KIRC	C15	C28: Pan-Kidney		0
TCGA-CZ-4858	KIRC-C1	C15:KIRC	C15	C3: Mesenchymal (Immune)	KIRC.3	1
TCGA-CJ-4637	KIRC-C1	C15:KIRC	C15	C28: Pan-Kidney	KIRC.3	0
TCGA-6D-AA2E	KIRC-C3	C14:KIRP	C9	C28: Pan-Kidney		0
TCGA-CW-5583	KIRC-C2	C15:KIRC	C15	C28: Pan-Kidney	KIRC.1	0
TCGA-A3-3317	KIRC-C1	C15:KIRC	C15	C28: Pan-Kidney	KIRC.2	1
TCGA-CJ-4881	KIRC-C1	C15:KIRC	C15	C28: Pan-Kidney	KIRC.4	1
TCGA-AK-3429	KIRC-C2	C15:KIRC	C15	C28: Pan-Kidney	KIRC.4
TCGA-AS-3778	KIRC-C1	C15:KIRC	C15			0
TCGA-A3-3324	KIRC-C2	C15:KIRC	C15	C28: Pan-Kidney	KIRC.2	0
TCGA-BP-4341	KIRC-C2	C15:KIRC	C15	C28: Pan-Kidney	KIRC.2	0
TCGA-A3-3352	KIRC-C2	C15:KIRC	C15		KIRC.1	1
TCGA-AK-3461	KIRC-C2	C15:KIRC	C15	C28: Pan-Kidney	KIRC.1
TCGA-B0-5707	KIRC-C3	C14:KIRP	C9		KIRC.
TCGA-B0-4847	KIRC-C2	C15:KIRC	C15	C28: Pan-Kidney	KIRC.2	0
TCGA-AK-3428	KIRC-C2	C15:KIRC	C15	C28: Pan-Kidney	KIRC.4	0
TCGA-BP-5189	KIRC-C1	C15:KIRC	C15	C28: Pan-Kidney	KIRC.1	0
TCGA-CJ-4920	KIRC-C1	C15:KIRC	C15	C28: Pan-Kidney	KIRC.3	0
TCGA-A3-3372	KIRC-C2	C15:KIRC	C15	C28: Pan-Kidney	KIRC.2	1
TCGA-B0-4706	KIRC-C2	C15:KIRC	C15	C28: Pan-Kidney	KIRC.2	0
TCGA-B2-3924	KIRC-C2	C15:KIRC	C15		KIRC.4	0
TCGA-B8-5549	KIRC-C2	C15:KIRC	C15	C28: Pan-Kidney	KIRC.1	1
TCGA-A3-3370	KIRC-C2	C15:KIRC	C15	C28: Pan-Kidney	KIRC.1	0
TCGA-B8-A54E	KIRC-C2	C14:KIRP	C9	C28: Pan-Kidney		0
TCGA-B4-5835	KIRC-C3	C14:KIRP	C9	C28: Pan-Kidney		1
TCGA-B0-4846	KIRC-C2	C15:KIRC	C15	C28: Pan-Kidney	KIRC.1	0
TCGA-A3-A6NN	KIRC-C2	C15:KIRC	C15	C28: Pan-Kidney		0
TCGA-CJ-4878	KIRC-C2	C15:KIRC	C15	C28: Pan-Kidney	KIRC.2	0
TCGA-B0-4828	KIRC-C2	C15:KIRC	C15	C28: Pan-Kidney	KIRC.2	0
TCGA-B0-5095	KIRC-C1	C15:KIRC	C15	C28: Pan-Kidney	KIRC.3	0
TCGA-AK-3455	KIRC-C2	C15:KIRC	C15	C28: Pan-Kidney	KIRC.4	0
TCGA-AK-3454	KIRC-C2	C15:KIRC	C15	C28: Pan-Kidney	KIRC.1	0
TCGA-BP-4763	KIRC-C1	C15:KIRC	C15	C28: Pan-Kidney	KIRC.3	1
TCGA-CZ-4856	KIRC-C2	C15:KIRC	C15	C28: Pan-Kidney	KIRC.1	0
TCGA-CZ-5463	KIRC-C2	C15:KIRC	C15	C28: Pan-Kidney	KIRC.1	0
TCGA-CZ-5464	KIRC-C1	C15:KIRC	C15	C28: Pan-Kidney	KIRC.4	1
TCGA-B0-4816	KIRC-C2	C15:KIRC	C15	C28: Pan-Kidney	KIRC.3	0
TCGA-CJ-4635	KIRC-C1	C15:KIRC	C15	C28: Pan-Kidney	KIRC.2	1
TCGA-B0-4852	KIRC-C2	C15:KIRC	C15	C28: Pan-Kidney	KIRC.1	0
TCGA-B0-5693	KIRC-C2	C15:KIRC	C15	C28: Pan-Kidney	KIRC.1	0
TCGA-B8-5545	KIRC-C1	C15:KIRC	C15	C28: Pan-Kidney	KIRC.3	0
TCGA-CJ-4905	KIRC-C2	C15:KIRC	C15	C28: Pan-Kidney	KIRC.1	0
TCGA-B0-4844	KIRC-C1	C15:KIRC	C15	C28: Pan-Kidney	KIRC.4	1
TCGA-B8-A7U6	KIRC-C2	C15:KIRC	C15	C28: Pan-Kidney		0
TCGA-CJ-5679	KIRC-C1	C15:KIRC	C15	C28: Pan-Kidney	KIRC.4	1
TCGA-BP-5006	KIRC-C2
TCGA-BP-5169	KIRC-C1	C15:KIRC	C15	C28: Pan-Kidney	KIRC.2	1
TCGA-CJ-4899	KIRC-C1	C15:KIRC	C15	C28: Pan-Kidney	KIRC.1	0
TCGA-CZ-5989	KIRC-C2	C15:KIRC	C15	C28: Pan-Kidney	KIRC.1	0
TCGA-A3-3385	KIRC-C2	C15:KIRC	C15	C28: Pan-Kidney	KIRC.1	1
TCGA-BP-4982	KIRC-C2	C15:KIRC	C15	C28: Pan-Kidney	KIRC.1	0
TCGA-BP-4169	KIRC-C1	C15:KIRC	C15	C28: Pan-Kidney	KIRC.3	0
TCGA-CJ-4894	KIRC-C2	C15:KIRC	C15	C28: Pan-Kidney	KIRC.1	0
TCGA-BP-5191	KIRC-C2	C15:KIRC	C15	C28: Pan-Kidney	KIRC.2	1
TCGA-BP-4346	KIRC-C2	C15:KIRC	C15	C28: Pan-Kidney	KIRC.2	0
TCGA-BP-5202	KIRC-C2	C15:KIRC	C15	C28: Pan-Kidney	KIRC.1	0
TCGA-BP-4349	KIRC-C2	C15:KIRC	C15		KIRC.2	0
TCGA-CJ-5671	KIRC-C1	C15:KIRC	C15	C28: Pan-Kidney	KIRC.3	1
TCGA-CJ-4904	KIRC-C2	C15:KIRC	C15	C28: Pan-Kidney	KIRC.1	0
TCGA-CJ-4873	KIRC-C1	C15:KIRC	C15	C28: Pan-Kidney	KIRC.4	1
TCGA-B0-5710	KIRC-C2	C15:KIRC	C15	C28: Pan-Kidney	KIRC.1	0
TCGA-B0-4699	KIRC-C3	C5:BRCA	C7	C20: Mixed (Stromal/Immune)		1
TCGA-BP-4971	KIRC-C1	C15:KIRC	C15	C28: Pan-Kidney	KIRC.2	0
TCGA-AK-3450	KIRC-C2	C15:KIRC	C15	C28: Pan-Kidney	KIRC.4	0
TCGA-BP-4329	KIRC-C2	C15:KIRC	C15	C28: Pan-Kidney	KIRC.4	0
TCGA-B2-5636	KIRC-C3	C15:KIRC	C15		KIRC.3
TCGA-CJ-4870	KIRC-C2	C15:KIRC	C15	C28: Pan-Kidney
TCGA-CJ-4884	KIRC-C2	C15:KIRC	C15	C28: Pan-Kidney	KIRC.2	0
TCGA-BP-4797	KIRC-C1	C15:KIRC	C15	C28: Pan-Kidney	KIRC.1	1
TCGA-BP-4799	KIRC-C1	C15:KIRC	C15	C28: Pan-Kidney	KIRC.3	1
TCGA-B0-4827	KIRC-C1	C15:KIRC	C15	C28: Pan-Kidney	KIRC.3	0
TCGA-BP-5180	KIRC-C2	C15:KIRC	C15	C28: Pan-Kidney	KIRC.4	0
TCGA-CZ-4862	KIRC-C1	C15:KIRC	C15	C28: Pan-Kidney	KIRC.1	0
TCGA-B0-5699	KIRC-C2	C15:KIRC	C15	C28: Pan-Kidney	KIRC.1	0
TCGA-CJ-4916	KIRC-C2	C15:KIRC	C15	C28: Pan-Kidney	KIRC.2	0
TCGA-A3-A6NL	KIRC-C2	C15:KIRC	C15	C28: Pan-Kidney		0
TCGA-CJ-4912	KIRC-C2	C15:KIRC	C15	C28: Pan-Kidney	KIRC.2	1
TCGA-DV-5566	KIRC-C2	C15:KIRC	C15	C28: Pan-Kidney	KIRC.4	0
TCGA-BP-4985	KIRC-C1	C15:KIRC	C15	C28: Pan-Kidney	KIRC.3	1
TCGA-AK-3425	KIRC-C1
TCGA-A3-3329	KIRC-C2	C15:KIRC	C15		KIRC.1
TCGA-B0-4836	KIRC-C2	C15:KIRC	C15	C28: Pan-Kidney	KIRC.3	1
TCGA-A3-3363	KIRC-C3	C14:KIRP	C9	C28: Pan-Kidney	KIRC.4	0
TCGA-BP-4992	KIRC-C2	C14:KIRP	C15	C28: Pan-Kidney	KIRC.2	1
TCGA-B0-4694	KIRC-C1	C15:KIRC	C15	C28: Pan-Kidney	KIRC.4	0
TCGA-B0-5694	KIRC-C2	C15:KIRC	C15	C28: Pan-Kidney	KIRC.2	0
TCGA-G6-A8L7	KIRC-C1	C6:LIHC	C15	C28: Pan-Kidney		1
TCGA-A3-3326	KIRC-C2	C15:KIRC	C15	C28: Pan-Kidney	KIRC.	0
TCGA-B8-5551	KIRC-C1	C15:KIRC	C15	C28: Pan-Kidney	KIRC.3	1
TCGA-BP-5198	KIRC-C1	C15:KIRC	C15	C28: Pan-Kidney	KIRC.3	1
TCGA-A3-3358	KIRC-C2	C15:KIRC	C15	C28: Pan-Kidney	KIRC.4	1
TCGA-CW-5591	KIRC-C3	C15:KIRC	C15	C28: Pan-Kidney	KIRC.1	1
TCGA-AK-3426	KIRC-C1	C15:KIRC	C15	C28: Pan-Kidney		0
TCGA-B0-4841	KIRC-C1	C15:KIRC	C15	C28: Pan-Kidney	KIRC.2	0
TCGA-CW-5589	KIRC-C2	C15:KIRC	C15	C28: Pan-Kidney	KIRC.1
TCGA-BP-4167	KIRC-C1	C15:KIRC	C15	C28: Pan-Kidney	KIRC.4	0
TCGA-BP-4347	KIRC-C2	C15:KIRC	C15	C28: Pan-Kidney	KIRC.2	1

[truncated: 17 more sheets: KIRP, LGG, LIHC, LUAD, LUSC, OV, PAAD, PCPG, PRAD, READ, SARC, SKCM, STAD, TGCT, THCA, THYM, UCEC]
